# Supplementary material for: Gain of 1q confers an MDM4-driven growth advantage to undifferentiated and differentiating hESC while altering their differentiation capacity
Source: Research Square preprint supplement (doi:10.21203/rs.3.rs-3467111/v1), 2023-12-13
Supplement: Supplementary file 1 [file 02befef73da99a680bdafcfc.xlsx]

## Sheet: Sheet1
Gene list	Reference	Cell type
SOX2,OTX2,ZIC2,SOX4,FEZF1,POU3F1,LHX5,HESX1,SIX3,PAX6,NES,CDH2,CNTN4,GLI3,DLX5,OTX1,MSX2,TFAP2B,GRHL3,WNT6	Shang et al., 2018	NE
SOX1,PAX6,SOX2,NESTIN,NCAM1,GBX2,SIX3,TUJ1,TUBB3	Vallier et al., 2009	NE
CDX2,HAND1,SOX7,GATA6	Vallier et al., 2009	Extraembryonic
TBXT,EOMES, FOXA2,SOX17,AFP,MIXL1	Vallier et al., 2009	Mesendoderm
NES,VIM,FOXG1,BRN2,TBR1,NEUROG1,NEUROG2,ASCL1,ELAVL4,MAP2	Barry et al., 2017	Neocortex
SYT4,DCX,MAP1B,TUBB3,CTIP2,SYT11,VGLUT2,SNAP25,GAT1,GABBR1,GABARAP,GAD1,GRIA2,OLIG2,STMN2,GLAST,GFAP	Barry et al., 2017	Neurogenesis
POU3F2,TBL1X,STAT2,ZKSCAN1,BAZ2B,TCEA2,ZNF235,RFX2,POU3F3,ANKRD45,SP110,SIX1	Yilmaz et al., 2020	NE
HEXIM1,CDX2,ZBTB10,KLF11,DLX4,FEV	Yilmaz et al., 2020	Early mesoderm
ANKRD1,ZNF114,HNF4A,CBX7,GLIS1,KLF1,FOXL1,MSC,ISL1,STAT4,FOXA1,AIRE	Yilmaz et al., 2020	Def endoderm
POU3F3, HOXA1, HOXB1,	Russo et al., 2021	NE
HES5,NR2E1,FOXG1	Tchieu et al., 2017	NE
PAX6, ZEB2, ZNF521, NES, NR2F2, OTX2, HDAC1, ZIC3, ZEB2, NEUROG2, SOX11, DACH1, ASCL1, HES5, SOX1, SOX21, MEIS2,DLL1,IGFBP3, ZNF503, MEOM, MIR124, FAM222A, FJX1, C6orf141, CCDC177, OTX2, FEZF2, LIX1, LMX1A, ZEB2, LHX5, DLK1, FEZF1, SIX3, LHX2, LRP2, SMOC1, PAMR1, FRZB, EPHA4, KCNC1, ME3, RAX, MYB, NEUROG2, ZNF385B, FZD5, IRS4, LRRC3B, LGI1, ZIC1, HESX1, ARHGAP15, HPSE2, LMO1, SIX6, HTR1A, CYP26A1	Gupta et al., 2023	NE
TFAP2A,GBX2,MSX1,PAX3,HES4,SNAI2,FOXD3,TFZP2E,ZIC1,GATA2,FOXI1,DIX3,EYA1,SIX1,DACH	Seal et al., 2020	Non-neural ectoderm
TFAP2A,TFAP2C, MSX1, DLX3,GATA2,GATA3,DLX5,DLX6	Ealy et al., 2016	Non-neural ectoderm
SIX1,SIX4,EYA1,EYA2,PAX3,PAX6,PAX2,PAX8, JAG1,ATOH1	Ealy et al., 2016	Pre-placode
SIX1,TFAP2A,HMX1,ELAVL4	Tchieu et al., 2017	Placode
SOX10,TFAP2A,ZNF229,HIST1H4F,ZNF542	Tchieu et al., 2017	Neural crest
SIX1, EYA1, PAX8, PAX2, GATA3, FBXO2, JAG1, GBX2, DLX5, FOXG1	Saeki et al., 2022	Placode
ERP27,DLX5,DLX3,TFAP2A,HAPLN1,MSX2,GATA3,MAP1LC3C,FOXC1,EYA1,EPSTI1,PRDM1,SYTL4,POU4F1, DKK1	Dincer et al., 2013	Placode
FOXA2,LMX1B,DDC,DLK1,GFAP,AQP4,ALDH1L1,ALDOC,MAOB,S100A10,S100A16,NFIX,CLU,FGF8,TOP2A,NUSAP1,KIF23,TPX2,SYN1,STAT3,BNIP3,FAT1,CLIP3,BLACAT1	Chandrasekaran et al., 2016; Engel et al., 2016, Cell Signalling Technology, 2018; Lendemeijer et al., 2022; Spreng et al., 2022	Astrocytes
GFAP, AQP1, AQP4, MAOB, S100A10, SLC1A2, SLC1A3, MLC1, CD44, SOX9, S100B, S100A16, GJA1, EDNRB, VIM, A2M, FGF8, NES, SOX1, CENPF, LMNB1, TOP2A, NUSAP1, KIF23, EZH2, TPX2	Spreng et al., 2022	Astrocytes
FAT1, TNC, HES1,NOTCH1, EGFR, STAT3, NFIA, NFIB, NFIX, S100B,SOX9, CLU	Jovanovic, 2023	Astrocytes
MOG,MBP	Cell Signaling Technology, 2018	Oligodendrocytes
NEUROD1,MAP2,TUBB3,DCLK1,NEFH	Cell Signaling Technology, 2018	Neural
NANOG,POU5F1,DNMT3B, ZFP42,DPPA3,KLF2,KLF4,LIN28A	Son et al., 20133; Giammartino et al., 2019; Sang et al., 2009	Pluripotency
EOMES,MESP1,MIXL1,TBXT,ISL1,TMEM88,HAND1,GATA4,ATP2A2,PLN,MYH6,MYH7,MYL7,NKX2-5,TBX5,TNNI1	Friedman et al., 2018	Cardiomyocyte differentiation time course
ATP2A2,TTN,RBM24,LDB3,QKI,PLD3,MYLK3,FHOD3,SORBS2,ALPK2,TMOD1,MEF2A,SMYD1,ADAMTS5,SLC8A1,OBSL1,HNRNPU,HEY2,TNNT2,ACTN2,NKX2-5,COL1A1,DCN,LUM,MKI67,HMGB2,PAX6,AFP,FOXA2,EPCAM,TFAP2A,GATA3,IRX1,PECAM1,CD34,KDR,GATA4	Cheng et al., 2023	Cardiac cell type
SPINK1,BRI3,NPW,FST,MAP2K2,MT1H,IGF2,AMN,APOM,DLK1,RSPO3,GSTP1,BAAT,AFP,CYP3A7,F2,AHSG,APOA1,LIPC,AGT,ALB,ANGPTL3,CFHR1,LEPR,APOB,GC,VTN,AKR1C1, CYP2E1,SAA1,HP,C9,ADH1B,F9,CES1,TAT,AZGP1,APCS,NNMT	Wesley et al., 2022	Hepatocyte differentiation stages
AFP,APOA1,APOC3,TTR,FGB,AHSG,FABP1,APOC1,MT1X,TF,APOM,RBP4,FGA,FGG,AMBP,MT1E,SERPINA1,ALB,VTN,KRT8,KRT18,TM4SF4,FXYD2,C3,SERPING1,CD5L,TIMD4,LILRB5,CETP,FCGR3A,SLC40A1,CD163,MARCO,FOLR2,VSIG4,MCOLN1,LGMN,MS4A7,CREG1,LIPA,C1QQC,C1QB,C1QA,CD68,HLA-DRA,HLA-DPA1,HLA-DPB1, LSP1,CD37,MNDA,CORO1A,RETN,CD48,RNASE6,HCST,VLYZ,RAMP2,DNASE1L3,FCN3,CLDN5,CAV1,LDB2,CRHBP,SDPR,OIT3,MYCT1,KDR,ESAM,HYAL2,CLEC1B,S…	Wesley et al., 2022	Hepatoblast
GATA2,GATA3,ITGA6,TP63,KRT7,KRT18,HAND1,NR2F2	Pham et al., 2022	Trophoblast
LUM,NID2,FOXF1,VIM,POSTN,ANXA1,DCN	Pham et al., 2022	Extraembryonic mesoderm
WNT6,GABRP,ISL1,HEY1,CDH10,CTSV,TPM1	Pham et al., 2022	Amnion
