# Supplementary material for: Gain of 1q confers an MDM4-driven growth advantage to undifferentiated and differentiating hESC while altering their differentiation capacity
Source: Research Square preprint supplement (doi:10.21203/rs.3.rs-3467111/v1), 2023-12-13
Supplement: Supplementary file 2 [file 599c09c44fc1874523aed622.xlsx]

## Sheet: Gene expression assays
Gene	Supplier	Catalog number
GUSB	Applied Biosystems	4326320E
PAX6	Thermo Scientific	Hs0024087
SOX1	Thermo Scientific	Hs01057642
AFP	Thermo Scientific	Hs00173490
HNF4A	Thermo Scientific	Hs00604435
GATA4	Thermo Scientific	Hs01034629
NKX2-5	Thermo Scientific	Hs00231763
POU5F1	Thermo Scientific	Hs00742896
NANOG	Thermo Scientific	Hs02387400
MDM4	Thermo Scientific	Hs00910358
NOXA1	Thermo Scientific	Hs00611456
PUMA	Thermo Scientific	Hs00248075
CDKN1A	Thermo Scientific	Hs00355782
BAX	Thermo Scientific	Hs00180269
Gene	Supplier	Catalog number
RNaseP	Thermo Scientific	4403326
ID1	Thermo Scientific	Hs01892845
KIF14	Thermo Scientific	Hs00637799
NANOG	Thermo Scientific	Hs03820140

## Sheet: Antibodies
Protein	Species	Supplier	Catalog number	Dilution
PAX6	Mouse	Abcam	ab78545	1:200
HNF4A	Mouse	Santa Cruz Biotechnology	Sc-374229	1:200
GATA4	Rabbit	Cell Signaling Technology	36966S	1:400
POU5F1	Rabbit	Cell Signaling Technology	2840S	1:400
POU5F1	Mouse	Santa Cruz Biotechnology	sc-5279	1:200
SOX17	Mouse	R&D Systems	MAB1924	1:100
TFAP2A	Mouse	Thermo Scientific	MA1-872	1:200
PAX6	Rabbit	BioLegend	PRB-278P	1:200
Histone H2A	Mouse	Sigma-Aldrich	05-636-25UG	1:500
Species	Conjugate	Supplier	Catalog number	Dilution
Donkey anti Mouse	Alexa Fluor 488	Thermo Fischer Scientific	A-21202	1:200
Donkey anti Mouse	Alexa Fluor 594	Thermo Fischer Scientific	A-21203	1:200
Donkey anti Rabbit	Alexa Fluor 488	Thermo Fischer Scientific	A-21206	1:200
Donkey anti Rabbit	Alexa Fluor 594	Thermo Fischer Scientific	A-21207	1:200
Hoechst 33342		Invitrogen	H3570	1:200
Donkey anti Rabbit	Alexa Fluor 647	Thermo Fischer Scientific	A-31573	1:200
Donkey anti Mouse	Alexa Fluor 647	Thermo Fischer Scientific	A-31571	1:200
