# Supplementary material for: Gain of 1q confers an MDM4-driven growth advantage to undifferentiated and differentiating hESC while altering their differentiation capacity
Source: Research Square preprint supplement (doi:10.21203/rs.3.rs-3467111/v1), 2023-12-13
Supplement: Supplementary file 4 [file b4d4807a7698a3800e40e021.xlsx]

## Sheet: Sheet1
ID	Description	GeneRatio	BgRatio	pvalue	p.adjust	qvalue	geneID	Count
R-HSA-3700989	Transcriptional Regulation by TP53	85/142	362/10955	2.20558e-91	1.5814e-88	8.28835e-89	PRKAB2/MDM4/CHM/RMI2/GATAD2B/ARID3A/RFFL/USP2/CHEK2/GPI/PIP4K2C/TAF1/PRKAG1/COX7A2L/MOV10/TP53BP2/EXO1/GTF2H4/LAMTOR2/GSR/PRDM1/PHF20/PCBP4/CDK1/PPP1R13L/RHNO1/TP63/TAF4B/CASP10/AGO4/TP73/PRDX5/COX6B1/PERP/GTF2H5/CSNK2A2/PRR5/PLAGL1/RRAGB/RBBP8/PIN1/HDAC2/RNF34/RPTOR/BID/PRKAG2/PRMT5/TXNRD1/SESN2/KMT5A/CCNE2/BAX/HIPK2/CDKN1B/RABGGTB/PPP1R13B/TP53/SESN1/POLR2D/MLH1/CNOT7/JUN/ELOA/DNA2/DYRK2/NELFCD…	85
R-HSA-5633007	Regulation of TP53 Activity	40/142	160/10955	2.24311e-41	8.04155e-39	4.21469e-39	PRKAB2/MDM4/RMI2/GATAD2B/RFFL/USP2/CHEK2/PIP4K2C/TAF1/PRKAG1/TP53BP2/EXO1/PRDM1/PHF20/CDK1/PPP1R13L/RHNO1/TP63/TAF4B/TP73/CSNK2A2/PRR5/RBBP8/PIN1/HDAC2/RNF34/PRKAG2/PRMT5/KMT5A/HIPK2/PPP1R13B/TP53/DNA2/DYRK2/PPP2R1B/PPP2CA/ING5/TP53INP1/USP7/BRPF3	40
R-HSA-69563	p53-Dependent G1 DNA Damage Response	21/142	66/10955	2.75922e-24	4.94591e-22	2.59222e-22	PSMB8/MDM4/PSMB4/CHEK2/PHF20/PCBP4/PSMD5/PSMD4/PSME4/PSMA4/CCNE2/PSME3/CDKN1B/PSMC5/TP53/PSMA6/PSMC3/PSMD7/PSMD11/PSMC4/PSMC2	21
R-HSA-69580	p53-Dependent G1/S DNA damage checkpoint	21/142	66/10955	2.75922e-24	4.94591e-22	2.59222e-22	PSMB8/MDM4/PSMB4/CHEK2/PHF20/PCBP4/PSMD5/PSMD4/PSME4/PSMA4/CCNE2/PSME3/CDKN1B/PSMC5/TP53/PSMA6/PSMC3/PSMD7/PSMD11/PSMC4/PSMC2	21
R-HSA-69615	G1/S DNA Damage Checkpoints	21/142	68/10955	5.69198e-24	8.1623e-22	4.27798e-22	PSMB8/MDM4/PSMB4/CHEK2/PHF20/PCBP4/PSMD5/PSMD4/PSME4/PSMA4/CCNE2/PSME3/CDKN1B/PSMC5/TP53/PSMA6/PSMC3/PSMD7/PSMD11/PSMC4/PSMC2	21
R-HSA-6807070	PTEN Regulation	26/142	140/10955	3.09222e-23	3.69521e-21	1.93671e-21	PSMB8/GATAD2B/PSMB4/MOV10/SNAI2/LAMTOR2/AGO4/PSMD5/CSNK2A2/RRAGB/PSMD4/HDAC2/RPTOR/PSME4/PSMA4/PSME3/PSMC5/TP53/PSMA6/PSMC3/JUN/PSMD7/PSMD11/PSMC4/PSMC2/USP7	26
R-HSA-1257604	PIP3 activates AKT signaling	32/142	267/10955	2.28279e-22	2.33823e-20	1.2255e-20	PSMB8/GATAD2B/PSMB4/PIP4K2C/MOV10/SNAI2/LAMTOR2/AGO4/PSMD5/CSNK2A2/PRR5/RRAGB/PSMD4/HDAC2/RPTOR/PSME4/PSMA4/PSME3/CDKN1B/PSMC5/TP53/PSMA6/PSMC3/JUN/PSMD7/AKT1S1/PPP2R1B/PPP2CA/PSMD11/PSMC4/PSMC2/USP7	32
R-HSA-9755511	KEAP1-NFE2L2 pathway	23/142	107/10955	3.59324e-22	3.22044e-20	1.68788e-20	PSMB8/PSMB4/GSR/PSMD5/CSNK2A2/PSMD4/SKP2/TXNRD1/PSME4/PSMA4/SESN2/PSME3/SLC7A11/PSMC5/PSMA6/SESN1/PSMC3/PSMD7/MYC/PSMD11/PSMC4/PSMC2/PRDX1	23
R-HSA-5633008	TP53 Regulates Transcription of Cell Death Genes	17/142	44/10955	1.57412e-21	1.25405e-19	6.57265e-20	CHM/TP53BP2/TP63/CASP10/TP73/PERP/BID/BAX/RABGGTB/PPP1R13B/TP53/TRIAP1/TP53INP1/TP53I3/BCL6/BBC3/TNFRSF10B	17
R-HSA-69541	Stabilization of p53	18/142	57/10955	7.15335e-21	5.12895e-19	2.68815e-19	PSMB8/MDM4/PSMB4/CHEK2/PHF20/PSMD5/PSMD4/PSME4/PSMA4/PSME3/PSMC5/TP53/PSMA6/PSMC3/PSMD7/PSMD11/PSMC4/PSMC2	18
R-HSA-9006925	Intracellular signaling by second messengers	32/142	309/10955	2.11109e-20	1.37605e-18	7.21206e-19	PSMB8/GATAD2B/PSMB4/PIP4K2C/MOV10/SNAI2/LAMTOR2/AGO4/PSMD5/CSNK2A2/PRR5/RRAGB/PSMD4/HDAC2/RPTOR/PSME4/PSMA4/PSME3/CDKN1B/PSMC5/TP53/PSMA6/PSMC3/JUN/PSMD7/AKT1S1/PPP2R1B/PPP2CA/PSMD11/PSMC4/PSMC2/USP7	32
R-HSA-109581	Apoptosis	26/142	180/10955	2.50848e-20	1.49882e-18	7.85551e-19	PSMB8/PSMB4/TP53BP2/CASP8/TP63/TP73/PSMD5/PSMD4/BID/PSME4/PSMA4/BAX/PSME3/PSMC5/PPP1R13B/TP53/PSMA6/PSMC3/PSMD7/PSMD11/PSMC4/PSMC2/APC/BCL2/BBC3/TNFRSF10B	26
R-HSA-5628897	TP53 Regulates Metabolic Genes	20/142	87/10955	5.19561e-20	2.86558e-18	1.50189e-18	PRKAB2/GPI/PRKAG1/COX7A2L/MOV10/LAMTOR2/GSR/TP63/AGO4/PRDX5/COX6B1/RRAGB/RPTOR/PRKAG2/TXNRD1/SESN2/TP53/SESN1/TSC1/PRDX1	20
R-HSA-5357801	Programmed Cell Death	27/142	213/10955	1.44922e-19	7.42207e-18	3.89001e-18	PSMB8/PSMB4/TP53BP2/CASP8/TP63/TP73/PSMD5/PSMD4/BID/PSME4/PSMA4/BAX/PSME3/PSMC5/PPP1R13B/TP53/PSMA6/PSMC3/PSMD7/PSMD11/PSMC4/PSMC2/HSP90AA1/APC/BCL2/BBC3/TNFRSF10B	27
R-HSA-9711123	Cellular response to chemical stress	26/142	199/10955	3.38123e-19	1.61623e-17	8.47086e-18	PSMB8/PSMB4/COX7A2L/GSR/PRDX5/COX6B1/PSMD5/CSNK2A2/PSMD4/SKP2/TXNRD1/PSME4/PSMA4/SESN2/PSME3/SLC7A11/PSMC5/PSMA6/SESN1/PSMC3/PSMD7/MYC/PSMD11/PSMC4/PSMC2/PRDX1	26
R-HSA-453279	Mitotic G1 phase and G1/S transition	23/142	149/10955	1.00042e-18	4.48314e-17	2.34968e-17	PSMB8/PSMB4/CDK1/PSMD5/PSMD4/SKP2/RB1/E2F3/PSMA4/CCNE2/PSME3/CDKN1B/PSMC5/PSMA6/PSMC3/PSMD7/MYC/PPP2R1B/PPP2CA/PSMD11/CCND2/PSMC4/PSMC2	23
R-HSA-5687128	MAPK6/MAPK4 signaling	19/142	89/10955	2.12455e-18	8.96059e-17	4.69637e-17	PSMB8/PSMB4/MOV10/CDK1/AGO4/PSMD5/PSMD4/PSME4/PSMA4/PSME3/PSMC5/PSMA6/PSMC3/JUN/PSMD7/MYC/PSMD11/PSMC4/PSMC2	19
R-HSA-9759194	Nuclear events mediated by NFE2L2	18/142	79/10955	5.00055e-18	1.99189e-16	1.04397e-16	PSMB8/PSMB4/GSR/PSMD5/PSMD4/TXNRD1/PSMA4/PSME3/SLC7A11/PSMC5/PSMA6/PSMC3/PSMD7/MYC/PSMD11/PSMC4/PSMC2/PRDX1	18
R-HSA-69620	Cell Cycle Checkpoints	29/142	293/10955	5.70057e-18	2.15121e-16	1.12748e-16	PSMB8/MDM4/RMI2/PSMB4/CHEK2/EXO1/PHF20/PCBP4/CDK1/RHNO1/PSMD5/PSMD4/RBBP8/PSME4/PSMA4/CCNE2/PSME3/CDKN1B/PSMC5/TP53/PSMA6/PSMC3/PSMD7/DNA2/PPP2R1B/PPP2CA/PSMD11/PSMC4/PSMC2	29
R-HSA-195253	Degradation of beta-catenin by the destruction complex	18/142	83/10955	1.29967e-17	4.43745e-16	2.32573e-16	PSMB8/PSMB4/PSMD5/PSMD4/PSME4/PSMA4/PSME3/PSMC5/PSMA6/PSMC3/CSNK1A1/PSMD7/PPP2R1B/PPP2CA/PSMD11/PSMC4/PSMC2/APC	18
R-HSA-69202	Cyclin E associated events during G1/S transition	18/142	83/10955	1.29967e-17	4.43745e-16	2.32573e-16	PSMB8/PSMB4/PSMD5/PSMD4/SKP2/RB1/PSMA4/CCNE2/PSME3/CDKN1B/PSMC5/PSMA6/PSMC3/PSMD7/MYC/PSMD11/PSMC4/PSMC2	18
R-HSA-69206	G1/S Transition	21/142	131/10955	1.61618e-17	5.26726e-16	2.76065e-16	PSMB8/PSMB4/CDK1/PSMD5/PSMD4/SKP2/RB1/PSMA4/CCNE2/PSME3/CDKN1B/PSMC5/PSMA6/PSMC3/PSMD7/MYC/PPP2R1B/PPP2CA/PSMD11/PSMC4/PSMC2	21
R-HSA-69656	Cyclin A:Cdk2-associated events at S phase entry	18/142	85/10955	2.05352e-17	6.40162e-16	3.35518e-16	PSMB8/PSMB4/PSMD5/PSMD4/SKP2/RB1/PSMA4/CCNE2/PSME3/CDKN1B/PSMC5/PSMA6/PSMC3/PSMD7/MYC/PSMD11/PSMC4/PSMC2	18
R-HSA-187577	SCF(Skp2)-mediated degradation of p27/p21	16/142	60/10955	2.47107e-17	7.38233e-16	3.86918e-16	PSMB8/PSMB4/PSMD5/PSMD4/SKP2/PSMA4/CCNE2/PSME3/CDKN1B/PSMC5/PSMA6/PSMC3/PSMD7/PSMD11/PSMC4/PSMC2	16
R-HSA-349425	Autodegradation of the E3 ubiquitin ligase COP1	15/142	52/10955	6.87201e-17	1.75972e-15	9.22296e-16	PSMB8/PSMB4/PSMD5/PSMD4/PSME4/PSMA4/PSME3/PSMC5/TP53/PSMA6/PSMC3/PSMD7/PSMD11/PSMC4/PSMC2	15
R-HSA-69601	Ubiquitin Mediated Degradation of Phosphorylated Cdc25A	15/142	52/10955	6.87201e-17	1.75972e-15	9.22296e-16	PSMB8/PSMB4/CHEK2/PSMD5/PSMD4/PSME4/PSMA4/PSME3/PSMC5/PSMA6/PSMC3/PSMD7/PSMD11/PSMC4/PSMC2	15
R-HSA-69610	p53-Independent DNA Damage Response	15/142	52/10955	6.87201e-17	1.75972e-15	9.22296e-16	PSMB8/PSMB4/CHEK2/PSMD5/PSMD4/PSME4/PSMA4/PSME3/PSMC5/PSMA6/PSMC3/PSMD7/PSMD11/PSMC4/PSMC2	15
R-HSA-69613	p53-Independent G1/S DNA damage checkpoint	15/142	52/10955	6.87201e-17	1.75972e-15	9.22296e-16	PSMB8/PSMB4/CHEK2/PSMD5/PSMD4/PSME4/PSMA4/PSME3/PSMC5/PSMA6/PSMC3/PSMD7/PSMD11/PSMC4/PSMC2	15
R-HSA-8852276	The role of GTSE1 in G2/M progression after G2 checkpoint	17/142	77/10955	7.85757e-17	1.94272e-15	1.0182e-15	PSMB8/PSMB4/CDK1/PSMD5/PSMD4/PSME4/PSMA4/PSME3/PSMC5/TP53/PSMA6/PSMC3/PSMD7/PSMD11/PSMC4/PSMC2/HSP90AA1	17
R-HSA-6804756	Regulation of TP53 Activity through Phosphorylation	18/142	92/10955	9.26619e-17	2.15367e-15	1.12877e-15	PRKAB2/MDM4/RMI2/CHEK2/TAF1/PRKAG1/EXO1/RHNO1/TAF4B/CSNK2A2/RBBP8/PIN1/PRKAG2/HIPK2/TP53/DNA2/DYRK2/TP53INP1	18
R-HSA-6803205	TP53 regulates transcription of several additional cell death genes whose specific roles in p53-dependent apoptosis remain uncertain	10/142	14/10955	9.31156e-17	2.15367e-15	1.12877e-15	CHM/TP53BP2/TP63/TP73/PERP/RABGGTB/PPP1R13B/TP53/TP53I3/BCL6	10
R-HSA-69481	G2/M Checkpoints	22/142	167/10955	1.97585e-16	4.42713e-15	2.32032e-15	PSMB8/RMI2/PSMB4/CHEK2/EXO1/CDK1/RHNO1/PSMD5/PSMD4/RBBP8/PSME4/PSMA4/PSME3/PSMC5/TP53/PSMA6/PSMC3/PSMD7/DNA2/PSMD11/PSMC4/PSMC2	22
R-HSA-450408	AUF1 (hnRNP D0) binds and destabilizes mRNA	15/142	56/10955	2.38546e-16	5.18295e-15	2.71645e-15	PSMB8/PSMB4/HSPA1A/PSMD5/PSMD4/PSME4/PSMA4/PSME3/PSMC5/PSMA6/PSMC3/PSMD7/PSMD11/PSMC4/PSMC2	15
R-HSA-6806003	Regulation of TP53 Expression and Degradation	13/142	37/10955	4.56016e-16	9.61657e-15	5.04018e-15	MDM4/RFFL/USP2/CHEK2/PRDM1/PHF20/CDK1/PRR5/RNF34/TP53/PPP2R1B/PPP2CA/USP7	13
R-HSA-351202	Metabolism of polyamines	15/142	59/10955	5.66596e-16	1.16071e-14	6.08345e-15	PSMB8/PSMB4/SAT1/PSMD5/PSMD4/PSME4/PSMA4/PSME3/PSMC5/PSMA6/PSMC3/PSMD7/PSMD11/PSMC4/PSMC2	15
R-HSA-5610783	Degradation of GLI2 by the proteasome	15/142	60/10955	7.47225e-16	1.448e-14	7.58917e-15	PSMB8/PSMB4/PSMD5/PSMD4/PSME4/PSMA4/PSME3/PSMC5/PSMA6/PSMC3/CSNK1A1/PSMD7/PSMD11/PSMC4/PSMC2	15
R-HSA-5610785	GLI3 is processed to GLI3R by the proteasome	15/142	60/10955	7.47225e-16	1.448e-14	7.58917e-15	PSMB8/PSMB4/PSMD5/PSMD4/PSME4/PSMA4/PSME3/PSMC5/PSMA6/PSMC3/CSNK1A1/PSMD7/PSMD11/PSMC4/PSMC2	15
R-HSA-174143	APC/C-mediated degradation of cell cycle proteins	17/142	88/10955	8.71305e-16	1.60186e-14	8.39557e-15	PSMB8/PSMB4/CDK1/PSMD5/PSMD4/SKP2/RB1/PSME4/PSMA4/PSME3/PSMC5/PSMA6/PSMC3/PSMD7/PSMD11/PSMC4/PSMC2	17
R-HSA-453276	Regulation of mitotic cell cycle	17/142	88/10955	8.71305e-16	1.60186e-14	8.39557e-15	PSMB8/PSMB4/CDK1/PSMD5/PSMD4/SKP2/RB1/PSME4/PSMA4/PSME3/PSMC5/PSMA6/PSMC3/PSMD7/PSMD11/PSMC4/PSMC2	17
R-HSA-1236978	Cross-presentation of soluble exogenous antigens (endosomes)	14/142	49/10955	9.03583e-16	1.60665e-14	8.42065e-15	PSMB8/PSMB4/PSMD5/PSMD4/PSME4/PSMA4/PSME3/PSMC5/PSMA6/PSMC3/PSMD7/PSMD11/PSMC4/PSMC2	14
R-HSA-8878166	Transcriptional regulation by RUNX2	19/142	121/10955	9.18723e-16	1.60665e-14	8.42065e-15	PSMB8/PSMB4/CDK1/PSMD5/PSMD4/SKP2/RB1/PSME4/PSMA4/BAX/PSME3/PSMC5/PSMA6/PSMC3/PSMD7/PSMD11/PSMC4/PSMC2/PPM1D	19
R-HSA-174178	APC/C:Cdh1 mediated degradation of Cdc20 and other APC/C:Cdh1 targeted proteins in late mitosis/early G1	16/142	74/10955	9.53359e-16	1.62752e-14	8.53006e-15	PSMB8/PSMB4/PSMD5/PSMD4/SKP2/RB1/PSME4/PSMA4/PSME3/PSMC5/PSMA6/PSMC3/PSMD7/PSMD11/PSMC4/PSMC2	16
R-HSA-211733	Regulation of activated PAK-2p34 by proteasome mediated degradation	14/142	50/10955	1.24126e-15	2.06972e-14	1.08477e-14	PSMB8/PSMB4/PSMD5/PSMD4/PSME4/PSMA4/PSME3/PSMC5/PSMA6/PSMC3/PSMD7/PSMD11/PSMC4/PSMC2	14
R-HSA-350562	Regulation of ornithine decarboxylase (ODC)	14/142	51/10955	1.69221e-15	2.75754e-14	1.44526e-14	PSMB8/PSMB4/PSMD5/PSMD4/PSME4/PSMA4/PSME3/PSMC5/PSMA6/PSMC3/PSMD7/PSMD11/PSMC4/PSMC2	14
R-HSA-162906	HIV Infection	24/142	231/10955	1.87666e-15	2.99014e-14	1.56717e-14	PSMB8/PSMB4/TAF1/GTF2H4/TAF4B/PSMD5/GTF2H5/PSMD4/PSME4/PSMA4/PSME3/PSMC5/PSMA6/POLR2D/PSMC3/PSMD7/ELOA/NELFCD/PSMD11/PSMC4/POLR2L/POLR2A/PSMC2/GTF2H1	24
R-HSA-180534	Vpu mediated degradation of CD4	14/142	52/10955	2.29034e-15	3.49399e-14	1.83125e-14	PSMB8/PSMB4/PSMD5/PSMD4/PSME4/PSMA4/PSME3/PSMC5/PSMA6/PSMC3/PSMD7/PSMD11/PSMC4/PSMC2	14
R-HSA-75815	Ubiquitin-dependent degradation of Cyclin D	14/142	52/10955	2.29034e-15	3.49399e-14	1.83125e-14	PSMB8/PSMB4/PSMD5/PSMD4/PSME4/PSMA4/PSME3/PSMC5/PSMA6/PSMC3/PSMD7/PSMD11/PSMC4/PSMC2	14
R-HSA-169911	Regulation of Apoptosis	14/142	53/10955	3.07849e-15	4.59849e-14	2.41013e-14	PSMB8/PSMB4/PSMD5/PSMD4/PSME4/PSMA4/PSME3/PSMC5/PSMA6/PSMC3/PSMD7/PSMD11/PSMC4/PSMC2	14
R-HSA-180585	Vif-mediated degradation of APOBEC3G	14/142	54/10955	4.11052e-15	5.89448e-14	3.08938e-14	PSMB8/PSMB4/PSMD5/PSMD4/PSME4/PSMA4/PSME3/PSMC5/PSMA6/PSMC3/PSMD7/PSMD11/PSMC4/PSMC2	14
R-HSA-8854050	FBXL7 down-regulates AURKA during mitotic entry and in early mitosis	14/142	54/10955	4.11052e-15	5.89448e-14	3.08938e-14	PSMB8/PSMB4/PSMD5/PSMD4/PSME4/PSMA4/PSME3/PSMC5/PSMA6/PSMC3/PSMD7/PSMD11/PSMC4/PSMC2	14
R-HSA-174113	SCF-beta-TrCP mediated degradation of Emi1	14/142	55/10955	5.45381e-15	7.51997e-14	3.94132e-14	PSMB8/PSMB4/PSMD5/PSMD4/PSME4/PSMA4/PSME3/PSMC5/PSMA6/PSMC3/PSMD7/PSMD11/PSMC4/PSMC2	14
R-HSA-4641257	Degradation of AXIN	14/142	55/10955	5.45381e-15	7.51997e-14	3.94132e-14	PSMB8/PSMB4/PSMD5/PSMD4/PSME4/PSMA4/PSME3/PSMC5/PSMA6/PSMC3/PSMD7/PSMD11/PSMC4/PSMC2	14
R-HSA-5362768	Hh mutants are degraded by ERAD	14/142	56/10955	7.19224e-15	9.57951e-14	5.02075e-14	PSMB8/PSMB4/PSMD5/PSMD4/PSME4/PSMA4/PSME3/PSMC5/PSMA6/PSMC3/PSMD7/PSMD11/PSMC4/PSMC2	14
R-HSA-8948751	Regulation of PTEN stability and activity	15/142	69/10955	7.21469e-15	9.57951e-14	5.02075e-14	PSMB8/PSMB4/PSMD5/CSNK2A2/PSMD4/PSME4/PSMA4/PSME3/PSMC5/PSMA6/PSMC3/PSMD7/PSMD11/PSMC4/PSMC2	15
R-HSA-4641258	Degradation of DVL	14/142	57/10955	9.42964e-15	1.22928e-13	6.44284e-14	PSMB8/PSMB4/PSMD5/PSMD4/PSME4/PSMA4/PSME3/PSMC5/PSMA6/PSMC3/PSMD7/PSMD11/PSMC4/PSMC2	14
R-HSA-68949	Orc1 removal from chromatin	15/142	71/10955	1.13893e-14	1.45824e-13	7.64282e-14	PSMB8/PSMB4/PSMD5/PSMD4/SKP2/PSME4/PSMA4/PSME3/PSMC5/PSMA6/PSMC3/PSMD7/PSMD11/PSMC4/PSMC2	15
R-HSA-6804757	Regulation of TP53 Degradation	12/142	36/10955	1.34813e-14	1.69581e-13	8.88795e-14	MDM4/RFFL/USP2/CHEK2/PHF20/CDK1/PRR5/RNF34/TP53/PPP2R1B/PPP2CA/USP7	12
R-HSA-5387390	Hh mutants abrogate ligand secretion	14/142	59/10955	1.59426e-14	1.92234e-13	1.00752e-13	PSMB8/PSMB4/PSMD5/PSMD4/PSME4/PSMA4/PSME3/PSMC5/PSMA6/PSMC3/PSMD7/PSMD11/PSMC4/PSMC2	14
R-HSA-5676590	NIK-->noncanonical NF-kB signaling	14/142	59/10955	1.59426e-14	1.92234e-13	1.00752e-13	PSMB8/PSMB4/PSMD5/PSMD4/PSME4/PSMA4/PSME3/PSMC5/PSMA6/PSMC3/PSMD7/PSMD11/PSMC4/PSMC2	14
R-HSA-6803204	TP53 Regulates Transcription of Genes Involved in Cytochrome C Release	10/142	20/10955	1.60865e-14	1.92234e-13	1.00752e-13	TP53BP2/TP63/TP73/BID/BAX/PPP1R13B/TP53/TRIAP1/TP53INP1/BBC3	10
R-HSA-174184	Cdc20:Phospho-APC/C mediated degradation of Cyclin A	15/142	73/10955	1.77142e-14	2.01605e-13	1.05664e-13	PSMB8/PSMB4/CDK1/PSMD5/PSMD4/PSME4/PSMA4/PSME3/PSMC5/PSMA6/PSMC3/PSMD7/PSMD11/PSMC4/PSMC2	15
R-HSA-69017	CDK-mediated phosphorylation and removal of Cdc6	15/142	73/10955	1.77142e-14	2.01605e-13	1.05664e-13	PSMB8/PSMB4/PSMD5/PSMD4/PSME4/PSMA4/CCNE2/PSME3/PSMC5/PSMA6/PSMC3/PSMD7/PSMD11/PSMC4/PSMC2	15
R-HSA-8939902	Regulation of RUNX2 expression and activity	15/142	73/10955	1.77142e-14	2.01605e-13	1.05664e-13	PSMB8/PSMB4/PSMD5/PSMD4/SKP2/PSME4/PSMA4/PSME3/PSMC5/PSMA6/PSMC3/PSMD7/PSMD11/PSMC4/PSMC2	15
R-HSA-5607761	Dectin-1 mediated noncanonical NF-kB signaling	14/142	60/10955	2.05673e-14	2.24335e-13	1.17577e-13	PSMB8/PSMB4/PSMD5/PSMD4/PSME4/PSMA4/PSME3/PSMC5/PSMA6/PSMC3/PSMD7/PSMD11/PSMC4/PSMC2	14
R-HSA-5610780	Degradation of GLI1 by the proteasome	14/142	60/10955	2.05673e-14	2.24335e-13	1.17577e-13	PSMB8/PSMB4/PSMD5/PSMD4/PSME4/PSMA4/PSME3/PSMC5/PSMA6/PSMC3/PSMD7/PSMD11/PSMC4/PSMC2	14
R-HSA-69242	S Phase	20/142	163/10955	2.06501e-14	2.24335e-13	1.17577e-13	PSMB8/PSMB4/PSMD5/PSMD4/SKP2/RB1/PSME4/PSMA4/CCNE2/PSME3/CDKN1B/PSMC5/PSMA6/PSMC3/PSMD7/MYC/DNA2/PSMD11/PSMC4/PSMC2	20
R-HSA-179419	APC:Cdc20 mediated degradation of cell cycle proteins prior to satisfation of the cell cycle checkpoint	15/142	74/10955	2.19755e-14	2.3517e-13	1.23256e-13	PSMB8/PSMB4/CDK1/PSMD5/PSMD4/PSME4/PSMA4/PSME3/PSMC5/PSMA6/PSMC3/PSMD7/PSMD11/PSMC4/PSMC2	15
R-HSA-5678895	Defective CFTR causes cystic fibrosis	14/142	61/10955	2.64018e-14	2.78383e-13	1.45904e-13	PSMB8/PSMB4/PSMD5/PSMD4/PSME4/PSMA4/PSME3/PSMC5/PSMA6/PSMC3/PSMD7/PSMD11/PSMC4/PSMC2	14
R-HSA-176409	APC/C:Cdc20 mediated degradation of mitotic proteins	15/142	76/10955	3.34814e-14	3.46476e-13	1.81593e-13	PSMB8/PSMB4/CDK1/PSMD5/PSMD4/PSME4/PSMA4/PSME3/PSMC5/PSMA6/PSMC3/PSMD7/PSMD11/PSMC4/PSMC2	15
R-HSA-8878171	Transcriptional regulation by RUNX1	23/142	237/10955	3.38261e-14	3.46476e-13	1.81593e-13	PSMB8/PSMB4/MOV10/AGO4/TP73/PSMD5/CSNK2A2/PSMD4/PSME4/PSMA4/HIPK2/PSME3/PSMC5/PSMA6/PSMC3/PSMD7/PRMT1/PSMD11/CCND2/PSMC4/PSMC2/KAT2B/THBS1	23
R-HSA-69052	Switching of origins to a post-replicative state	16/142	92/10955	3.67065e-14	3.70684e-13	1.9428e-13	PSMB8/PSMB4/PSMD5/PSMD4/SKP2/PSME4/PSMA4/CCNE2/PSME3/PSMC5/PSMA6/PSMC3/PSMD7/PSMD11/PSMC4/PSMC2	16
R-HSA-176814	Activation of APC/C and APC/C:Cdc20 mediated degradation of mitotic proteins	15/142	77/10955	4.11281e-14	4.09567e-13	2.1466e-13	PSMB8/PSMB4/CDK1/PSMD5/PSMD4/PSME4/PSMA4/PSME3/PSMC5/PSMA6/PSMC3/PSMD7/PSMD11/PSMC4/PSMC2	15
R-HSA-4608870	Asymmetric localization of PCP proteins	14/142	64/10955	5.43012e-14	5.33341e-13	2.79532e-13	PSMB8/PSMB4/PSMD5/PSMD4/PSME4/PSMA4/PSME3/PSMC5/PSMA6/PSMC3/PSMD7/PSMD11/PSMC4/PSMC2	14
R-HSA-5358346	Hedgehog ligand biogenesis	14/142	65/10955	6.84504e-14	6.5872e-13	3.45244e-13	PSMB8/PSMB4/PSMD5/PSMD4/PSME4/PSMA4/PSME3/PSMC5/PSMA6/PSMC3/PSMD7/PSMD11/PSMC4/PSMC2	14
R-HSA-9762114	GSK3B and BTRC:CUL1-mediated-degradation of NFE2L2	13/142	52/10955	6.89037e-14	6.5872e-13	3.45244e-13	PSMB8/PSMB4/PSMD5/PSMD4/PSMA4/PSME3/PSMC5/PSMA6/PSMC3/PSMD7/PSMD11/PSMC4/PSMC2	13
R-HSA-8878159	Transcriptional regulation by RUNX3	16/142	96/10955	7.37975e-14	6.96222e-13	3.64899e-13	PSMB8/PSMB4/PSMD5/PSMD4/PSMA4/PSME3/PSMC5/TP53/PSMA6/PSMC3/PSMD7/MYC/PSMD11/PSMC4/PSMC2/KAT2B	16
R-HSA-1234176	Oxygen-dependent proline hydroxylation of Hypoxia-inducible Factor Alpha	14/142	66/10955	8.5929e-14	8.00144e-13	4.19366e-13	PSMB8/PSMB4/PSMD5/PSMD4/PSME4/PSMA4/PSME3/PSMC5/PSMA6/PSMC3/PSMD7/PSMD11/PSMC4/PSMC2	14
R-HSA-176408	Regulation of APC/C activators between G1/S and early anaphase	15/142	81/10955	9.08653e-14	8.35262e-13	4.37772e-13	PSMB8/PSMB4/CDK1/PSMD5/PSMD4/PSME4/PSMA4/PSME3/PSMC5/PSMA6/PSMC3/PSMD7/PSMD11/PSMC4/PSMC2	15
R-HSA-1169091	Activation of NF-kappaB in B cells	14/142	67/10955	1.07439e-13	9.75111e-13	5.11069e-13	PSMB8/PSMB4/PSMD5/PSMD4/PSME4/PSMA4/PSME3/PSMC5/PSMA6/PSMC3/PSMD7/PSMD11/PSMC4/PSMC2	14
R-HSA-9604323	Negative regulation of NOTCH4 signaling	13/142	54/10955	1.17624e-13	1.05421e-12	5.52525e-13	PSMB8/PSMB4/PSMD5/PSMD4/PSMA4/PSME3/PSMC5/PSMA6/PSMC3/PSMD7/PSMD11/PSMC4/PSMC2	13
R-HSA-174154	APC/C:Cdc20 mediated degradation of Securin	14/142	68/10955	1.33814e-13	1.17005e-12	6.1324e-13	PSMB8/PSMB4/PSMD5/PSMD4/PSME4/PSMA4/PSME3/PSMC5/PSMA6/PSMC3/PSMD7/PSMD11/PSMC4/PSMC2	14
R-HSA-5658442	Regulation of RAS by GAPs	14/142	68/10955	1.33814e-13	1.17005e-12	6.1324e-13	PSMB8/PSMB4/PSMD5/PSMD4/PSME4/PSMA4/PSME3/PSMC5/PSMA6/PSMC3/PSMD7/PSMD11/PSMC4/PSMC2	14
R-HSA-8941858	Regulation of RUNX3 expression and activity	13/142	55/10955	1.52344e-13	1.31603e-12	6.89749e-13	PSMB8/PSMB4/PSMD5/PSMD4/PSMA4/PSME3/PSMC5/PSMA6/PSMC3/PSMD7/PSMD11/PSMC4/PSMC2	13
R-HSA-5663202	Diseases of signal transduction by growth factor receptors and second messengers	29/142	433/10955	1.79453e-13	1.53176e-12	8.02816e-13	PSMB8/PSMB4/DKK1/PSMD5/PRR5/PSMD4/HDAC2/PSME4/PSMA4/PSME3/CDKN1B/PSMC5/PSMA6/POLR2D/PSMC3/CSNK1A1/PSMD7/MYC/AKT1S1/PPP2R1B/PPP2CA/PSMD11/PSMC4/POLR2L/POLR2A/PSMC2/HSP90AA1/APC/KAT2B	29
R-HSA-5632684	Hedgehog 'on' state	15/142	85/10955	1.92041e-13	1.61993e-12	8.49025e-13	PSMB8/PSMB4/PSMD5/PSMD4/PSME4/PSMA4/PSME3/PSMC5/PSMA6/PSMC3/CSNK1A1/PSMD7/PSMD11/PSMC4/PSMC2	15
R-HSA-201681	TCF dependent signaling in response to WNT	22/142	232/10955	2.07561e-13	1.73048e-12	9.06969e-13	PSMB8/PSMB4/DKK1/PSMD5/CSNK2A2/PSMD4/PSME4/PSMA4/PSME3/PSMC5/PSMA6/PSMC3/CSNK1A1/PSMD7/MYC/TRRAP/PPP2R1B/PPP2CA/PSMD11/PSMC4/PSMC2/APC	22
R-HSA-69239	Synthesis of DNA	17/142	121/10955	2.19126e-13	1.8059e-12	9.46496e-13	PSMB8/PSMB4/PSMD5/PSMD4/SKP2/PSME4/PSMA4/CCNE2/PSME3/PSMC5/PSMA6/PSMC3/PSMD7/DNA2/PSMD11/PSMC4/PSMC2	17
R-HSA-450531	Regulation of mRNA stability by proteins that bind AU-rich elements	15/142	88/10955	3.27856e-13	2.67128e-12	1.40005e-12	PSMB8/PSMB4/HSPA1A/PSMD5/PSMD4/PSME4/PSMA4/PSME3/PSMC5/PSMA6/PSMC3/PSMD7/PSMD11/PSMC4/PSMC2	15
R-HSA-5688426	Deubiquitination	24/142	298/10955	5.54419e-13	4.4665e-12	2.34095e-12	PSMB8/MDM4/PSMB4/USP2/CDK1/PSMD5/PSMD4/SKP2/PSME4/PSMA4/PSME3/PSMC5/TP53/PSMA6/PSMC3/PSMD7/MYC/TRRAP/PSMD11/PSMC4/PSMC2/APC/USP7/KAT2B	24
R-HSA-1234174	Cellular response to hypoxia	14/142	75/10955	5.63669e-13	4.49056e-12	2.35356e-12	PSMB8/PSMB4/PSMD5/PSMD4/PSME4/PSMA4/PSME3/PSMC5/PSMA6/PSMC3/PSMD7/PSMD11/PSMC4/PSMC2	14
R-HSA-5689880	Ub-specific processing proteases	21/142	220/10955	6.7564e-13	5.32345e-12	2.79009e-12	PSMB8/MDM4/PSMB4/USP2/PSMD5/PSMD4/SKP2/PSME4/PSMA4/PSME3/PSMC5/TP53/PSMA6/PSMC3/PSMD7/MYC/TRRAP/PSMD11/PSMC4/PSMC2/USP7	21
R-HSA-453274	Mitotic G2-G2/M phases	20/142	198/10955	8.65123e-13	6.74232e-12	3.53374e-12	PSMB8/PSMB4/CDK1/PSMD5/PSMD4/E2F3/PSME4/PSMA4/PSME3/PSMC5/TP53/PSMA6/PSMC3/PSMD7/PPP2R1B/PPP2CA/PSMD11/PSMC4/PSMC2/HSP90AA1	20
R-HSA-5619084	ABC transporter disorders	14/142	78/10955	9.95808e-13	7.67736e-12	4.02381e-12	PSMB8/PSMB4/PSMD5/PSMD4/PSME4/PSMA4/PSME3/PSMC5/PSMA6/PSMC3/PSMD7/PSMD11/PSMC4/PSMC2	14
R-HSA-174084	Autodegradation of Cdh1 by Cdh1:APC/C	13/142	64/10955	1.24887e-12	9.52593e-12	4.99267e-12	PSMB8/PSMB4/PSMD5/PSMD4/PSMA4/PSME3/PSMC5/PSMA6/PSMC3/PSMD7/PSMD11/PSMC4/PSMC2	13
R-HSA-9020702	Interleukin-1 signaling	16/142	115/10955	1.35588e-12	1.02333e-11	5.36342e-12	PSMB8/PSMB4/CASP8/PSMD5/PSMD4/PSME4/PSMA4/PSME3/PSMC5/TP53/PSMA6/PSMC3/PSMD7/PSMD11/PSMC4/PSMC2	16
R-HSA-2871837	FCERI mediated NF-kB activation	14/142	82/10955	2.04661e-12	1.5128e-11	7.9288e-12	PSMB8/PSMB4/PSMD5/PSMD4/PSME4/PSMA4/PSME3/PSMC5/PSMA6/PSMC3/PSMD7/PSMD11/PSMC4/PSMC2	14
R-HSA-9013694	Signaling by NOTCH4	14/142	82/10955	2.04661e-12	1.5128e-11	7.9288e-12	PSMB8/PSMB4/PSMD5/PSMD4/PSMA4/PSME3/PSMC5/PSMA6/PSMC3/PSMD7/PSMD11/PSMC4/PSMC2/KAT2B	14
R-HSA-1168372	Downstream signaling events of B Cell Receptor (BCR)	14/142	83/10955	2.43492e-12	1.77511e-11	9.30361e-12	PSMB8/PSMB4/PSMD5/PSMD4/PSME4/PSMA4/PSME3/PSMC5/PSMA6/PSMC3/PSMD7/PSMD11/PSMC4/PSMC2	14
R-HSA-157118	Signaling by NOTCH	21/142	235/10955	2.45099e-12	1.77511e-11	9.30361e-12	PSMB8/PSMB4/MOV10/AGO4/PSMD5/PSMD4/HDAC2/E2F3/PSMA4/PSME3/PSMC5/TP53/PSMA6/PSMC3/JUN/PSMD7/MYC/PSMD11/PSMC4/PSMC2/KAT2B	21
R-HSA-5607764	CLEC7A (Dectin-1) signaling	15/142	101/10955	2.66527e-12	1.911e-11	1.00158e-11	PSMB8/PSMB4/CASP8/PSMD5/PSMD4/PSME4/PSMA4/PSME3/PSMC5/PSMA6/PSMC3/PSMD7/PSMD11/PSMC4/PSMC2	15
R-HSA-382556	ABC-family proteins mediated transport	15/142	103/10955	3.57799e-12	2.54002e-11	1.33126e-11	PSMB8/PSMB4/PSMD5/PSMD4/PSME4/PSMA4/PSME3/PSMC5/PSMA6/PSMC3/PSMD7/PSMD11/PSMC4/ABCB1/PSMC2	15
R-HSA-195721	Signaling by WNT	24/142	331/10955	5.35061e-12	3.76116e-11	1.97128e-11	PSMB8/PSMB4/MOV10/DKK1/AGO4/PSMD5/CSNK2A2/PSMD4/PSME4/PSMA4/PSME3/PSMC5/PSMA6/PSMC3/CSNK1A1/PSMD7/MYC/TRRAP/PPP2R1B/PPP2CA/PSMD11/PSMC4/PSMC2/APC	24
R-HSA-69275	G2/M Transition	19/142	196/10955	7.02483e-12	4.8901e-11	2.56297e-11	PSMB8/PSMB4/CDK1/PSMD5/PSMD4/PSME4/PSMA4/PSME3/PSMC5/TP53/PSMA6/PSMC3/PSMD7/PPP2R1B/PPP2CA/PSMD11/PSMC4/PSMC2/HSP90AA1	19
R-HSA-1236974	ER-Phagosome pathway	14/142	90/10955	7.70439e-12	5.31158e-11	2.78387e-11	PSMB8/PSMB4/PSMD5/PSMD4/PSME4/PSMA4/PSME3/PSMC5/PSMA6/PSMC3/PSMD7/PSMD11/PSMC4/PSMC2	14
R-HSA-4086400	PCP/CE pathway	14/142	92/10955	1.05056e-11	7.17383e-11	3.7599e-11	PSMB8/PSMB4/PSMD5/PSMD4/PSME4/PSMA4/PSME3/PSMC5/PSMA6/PSMC3/PSMD7/PSMD11/PSMC4/PSMC2	14
R-HSA-5610787	Hedgehog 'off' state	15/142	113/10955	1.42117e-11	9.61302e-11	5.03831e-11	PSMB8/PSMB4/PSMD5/PSMD4/PSME4/PSMA4/PSME3/PSMC5/PSMA6/PSMC3/CSNK1A1/PSMD7/PSMD11/PSMC4/PSMC2	15
R-HSA-6796648	TP53 Regulates Transcription of DNA Repair Genes	12/142	62/10955	1.74639e-11	1.16924e-10	6.12813e-11	GTF2H4/GTF2H5/TP53/POLR2D/MLH1/JUN/ELOA/NELFCD/POLR2L/POLR2A/GTF2H1/CDK12	12
R-HSA-6791312	TP53 Regulates Transcription of Cell Cycle Genes	11/142	48/10955	1.76119e-11	1.16924e-10	6.12813e-11	ARID3A/PCBP4/CDK1/PLAGL1/CCNE2/BAX/CDKN1B/TP53/CNOT7/E2F8/PRMT1	11
R-HSA-202424	Downstream TCR signaling	14/142	98/10955	2.54662e-11	1.66919e-10	8.74845e-11	PSMB8/PSMB4/PSMD5/PSMD4/PSME4/PSMA4/PSME3/PSMC5/PSMA6/PSMC3/PSMD7/PSMD11/PSMC4/PSMC2	14
R-HSA-5683057	MAPK family signaling cascades	23/142	325/10955	2.56082e-11	1.66919e-10	8.74845e-11	PSMB8/PSMB4/MOV10/LAMTOR2/CDK1/AGO4/PSMD5/PSMD4/PSME4/PSMA4/PSME3/PSMC5/PSMA6/PSMC3/JUN/PSMD7/MYC/PPP2R1B/PPP2CA/PSMD11/PSMC4/PSMC2/DUSP1	23
R-HSA-5668541	TNFR2 non-canonical NF-kB pathway	14/142	102/10955	4.44094e-11	2.84299e-10	1.49005e-10	PSMB8/PSMB4/PSMD5/PSMD4/PSME4/PSMA4/PSME3/PSMC5/PSMA6/PSMC3/PSMD7/PSMD11/PSMC4/PSMC2	14
R-HSA-5689603	UCH proteinases	14/142	102/10955	4.44094e-11	2.84299e-10	1.49005e-10	PSMB8/PSMB4/PSMD5/PSMD4/PSME4/PSMA4/PSME3/PSMC5/PSMA6/PSMC3/PSMD7/PSMD11/PSMC4/PSMC2	14
R-HSA-3858494	Beta-catenin independent WNT signaling	16/142	146/10955	5.59649e-11	3.55105e-10	1.86115e-10	PSMB8/PSMB4/MOV10/AGO4/PSMD5/PSMD4/PSME4/PSMA4/PSME3/PSMC5/PSMA6/PSMC3/PSMD7/PSMD11/PSMC4/PSMC2	16
R-HSA-449147	Signaling by Interleukins	27/142	473/10955	5.70114e-11	3.58572e-10	1.87932e-10	PSMB8/PSMB4/ICAM1/MMP2/CASP8/MCL1/PSMD5/PSMD4/LIF/PSME4/PSMA4/PSME3/PSMC5/TP53/PSMA6/PSMC3/JUN/PSMD7/MYC/PPP2R1B/PPP2CA/PSMD11/PSMC4/PSMC2/HSP90AA1/BCL6/BCL2	27
R-HSA-1236975	Antigen processing-Cross presentation	14/142	105/10955	6.63e-11	4.13366e-10	2.16651e-10	PSMB8/PSMB4/PSMD5/PSMD4/PSME4/PSMA4/PSME3/PSMC5/PSMA6/PSMC3/PSMD7/PSMD11/PSMC4/PSMC2	14
R-HSA-8939236	RUNX1 regulates transcription of genes involved in differentiation of HSCs	15/142	129/10955	9.84978e-11	6.08819e-10	3.1909e-10	PSMB8/PSMB4/TP73/PSMD5/PSMD4/PSME4/PSMA4/PSME3/PSMC5/PSMA6/PSMC3/PSMD7/PSMD11/PSMC4/PSMC2	15
R-HSA-446652	Interleukin-1 family signaling	16/142	153/10955	1.1417e-10	6.99659e-10	3.66701e-10	PSMB8/PSMB4/CASP8/PSMD5/PSMD4/PSME4/PSMA4/PSME3/PSMC5/TP53/PSMA6/PSMC3/PSMD7/PSMD11/PSMC4/PSMC2	16
R-HSA-983705	Signaling by the B Cell Receptor (BCR)	14/142	112/10955	1.60736e-10	9.76678e-10	5.1189e-10	PSMB8/PSMB4/PSMD5/PSMD4/PSME4/PSMA4/PSME3/PSMC5/PSMA6/PSMC3/PSMD7/PSMD11/PSMC4/PSMC2	14
R-HSA-6804759	Regulation of TP53 Activity through Association with Co-factors	7/142	14/10955	1.68621e-10	1.01598e-09	5.32488e-10	TP53BP2/PHF20/PPP1R13L/TP63/TP73/PPP1R13B/TP53	7
R-HSA-2454202	Fc epsilon receptor (FCERI) signaling	15/142	134/10955	1.70424e-10	1.01828e-09	5.33695e-10	PSMB8/PSMB4/PSMD5/PSMD4/PSME4/PSMA4/PSME3/PSMC5/PSMA6/PSMC3/JUN/PSMD7/PSMD11/PSMC4/PSMC2	15
R-HSA-69306	DNA Replication	17/142	187/10955	2.67831e-10	1.58706e-09	8.31802e-10	PSMB8/PSMB4/PSMD5/PSMD4/SKP2/PSME4/PSMA4/CCNE2/PSME3/PSMC5/PSMA6/PSMC3/PSMD7/DNA2/PSMD11/PSMC4/PSMC2	17
R-HSA-5621481	C-type lectin receptors (CLRs)	15/142	142/10955	3.90582e-10	2.29547e-09	1.20309e-09	PSMB8/PSMB4/CASP8/PSMD5/PSMD4/PSME4/PSMA4/PSME3/PSMC5/PSMA6/PSMC3/PSMD7/PSMD11/PSMC4/PSMC2	15
R-HSA-202403	TCR signaling	14/142	120/10955	4.10067e-10	2.39039e-09	1.25283e-09	PSMB8/PSMB4/PSMD5/PSMD4/PSME4/PSMA4/PSME3/PSMC5/PSMA6/PSMC3/PSMD7/PSMD11/PSMC4/PSMC2	14
R-HSA-9010553	Regulation of expression of SLITs and ROBOs	16/142	172/10955	6.6165e-10	3.82583e-09	2.00517e-09	PSMB8/PSMB4/RPL23/PSMD5/PSMD4/PSME4/PSMA4/PSME3/PSMC5/PSMA6/PSMC3/PSMD7/RPS27L/PSMD11/PSMC4/PSMC2	16
R-HSA-5358351	Signaling by Hedgehog	15/142	149/10955	7.72532e-10	4.43124e-09	2.32247e-09	PSMB8/PSMB4/PSMD5/PSMD4/PSME4/PSMA4/PSME3/PSMC5/PSMA6/PSMC3/CSNK1A1/PSMD7/PSMD11/PSMC4/PSMC2	15
R-HSA-162909	Host Interactions of HIV factors	14/142	130/10955	1.19948e-09	6.82562e-09	3.5774e-09	PSMB8/PSMB4/PSMD5/PSMD4/PSME4/PSMA4/PSME3/PSMC5/PSMA6/PSMC3/PSMD7/PSMD11/PSMC4/PSMC2	14
R-HSA-109606	Intrinsic Pathway for Apoptosis	10/142	55/10955	1.73159e-09	9.77599e-09	5.12373e-09	TP53BP2/CASP8/TP63/TP73/BID/BAX/PPP1R13B/TP53/BCL2/BBC3	10
R-HSA-114452	Activation of BH3-only proteins	8/142	30/10955	3.00774e-09	1.68481e-08	8.8303e-09	TP53BP2/TP63/TP73/BID/PPP1R13B/TP53/BCL2/BBC3	8
R-HSA-2467813	Separation of Sister Chromatids	16/142	191/10955	3.09092e-09	1.71798e-08	9.00415e-09	PSMB8/PSMB4/PSMD5/PSMD4/PSME4/PSMA4/PSME3/PSMC5/PSMA6/PSMC3/PSMD7/PPP2R1B/PPP2CA/PSMD11/PSMC4/PSMC2	16
R-HSA-6803211	TP53 Regulates Transcription of Death Receptors and Ligands	6/142	12/10955	3.69795e-09	2.03956e-08	1.06896e-08	TP53BP2/TP63/TP73/PPP1R13B/TP53/TNFRSF10B	6
R-HSA-5684996	MAPK1/MAPK3 signaling	19/142	286/10955	4.6291e-09	2.53364e-08	1.32791e-08	PSMB8/PSMB4/LAMTOR2/CDK1/PSMD5/PSMD4/PSME4/PSMA4/PSME3/PSMC5/PSMA6/PSMC3/PSMD7/PPP2R1B/PPP2CA/PSMD11/PSMC4/PSMC2/DUSP1	19
R-HSA-68882	Mitotic Anaphase	17/142	236/10955	9.5982e-09	5.21357e-08	2.7325e-08	PSMB8/PSMB4/CDK1/PSMD5/PSMD4/PSME4/PSMA4/PSME3/PSMC5/PSMA6/PSMC3/PSMD7/PPP2R1B/PPP2CA/PSMD11/PSMC4/PSMC2	17
R-HSA-2555396	Mitotic Metaphase and Anaphase	17/142	237/10955	1.02271e-08	5.51341e-08	2.88965e-08	PSMB8/PSMB4/CDK1/PSMD5/PSMD4/PSME4/PSMA4/PSME3/PSMC5/PSMA6/PSMC3/PSMD7/PPP2R1B/PPP2CA/PSMD11/PSMC4/PSMC2	17
R-HSA-6804116	TP53 Regulates Transcription of Genes Involved in G1 Cell Cycle Arrest	6/142	14/10955	1.1764e-08	6.29463e-08	3.2991e-08	ARID3A/PCBP4/CCNE2/CDKN1B/TP53/E2F8	6
R-HSA-167172	Transcription of the HIV genome	10/142	70/10955	1.99085e-08	1.05736e-07	5.54178e-08	TAF1/GTF2H4/TAF4B/GTF2H5/POLR2D/ELOA/NELFCD/POLR2L/POLR2A/GTF2H1	10
R-HSA-5673001	RAF/MAP kinase cascade	18/142	280/10955	2.03452e-08	1.07261e-07	5.6217e-08	PSMB8/PSMB4/LAMTOR2/PSMD5/PSMD4/PSME4/PSMA4/PSME3/PSMC5/PSMA6/PSMC3/PSMD7/PPP2R1B/PPP2CA/PSMD11/PSMC4/PSMC2/DUSP1	18
R-HSA-376176	Signaling by ROBO receptors	16/142	219/10955	2.2069e-08	1.155e-07	6.05351e-08	PSMB8/PSMB4/RPL23/PSMD5/PSMD4/PSME4/PSMA4/PSME3/PSMC5/PSMA6/PSMC3/PSMD7/RPS27L/PSMD11/PSMC4/PSMC2	16
R-HSA-68867	Assembly of the pre-replicative complex	13/142	142/10955	3.49878e-08	1.81784e-07	9.52757e-08	PSMB8/PSMB4/PSMD5/PSMD4/PSMA4/PSME3/PSMC5/PSMA6/PSMC3/PSMD7/PSMD11/PSMC4/PSMC2	13
R-HSA-165159	MTOR signalling	8/142	41/10955	4.35422e-08	2.24602e-07	1.17717e-07	PRKAB2/PRKAG1/LAMTOR2/RRAGB/RPTOR/PRKAG2/AKT1S1/TSC1	8
R-HSA-5619115	Disorders of transmembrane transporters	14/142	176/10955	6.09913e-08	3.12363e-07	1.63713e-07	PSMB8/PSMB4/PSMD5/PSMD4/PSME4/PSMA4/PSME3/PSMC5/PSMA6/PSMC3/PSMD7/PSMD11/PSMC4/PSMC2	14
R-HSA-167169	HIV Transcription Elongation	8/142	43/10955	6.46543e-08	3.24176e-07	1.69905e-07	GTF2H4/GTF2H5/POLR2D/ELOA/NELFCD/POLR2L/POLR2A/GTF2H1	8
R-HSA-167200	Formation of HIV-1 elongation complex containing HIV-1 Tat	8/142	43/10955	6.46543e-08	3.24176e-07	1.69905e-07	GTF2H4/GTF2H5/POLR2D/ELOA/NELFCD/POLR2L/POLR2A/GTF2H1	8
R-HSA-167246	Tat-mediated elongation of the HIV-1 transcript	8/142	43/10955	6.46543e-08	3.24176e-07	1.69905e-07	GTF2H4/GTF2H5/POLR2D/ELOA/NELFCD/POLR2L/POLR2A/GTF2H1	8
R-HSA-380972	Energy dependent regulation of mTOR by LKB1-AMPK	7/142	29/10955	6.51824e-08	3.24554e-07	1.70103e-07	PRKAB2/PRKAG1/LAMTOR2/RRAGB/RPTOR/PRKAG2/TSC1	7
R-HSA-674695	RNA Polymerase II Pre-transcription Events	10/142	81/10955	8.35105e-08	4.12945e-07	2.1643e-07	TAF1/GTF2H4/TAF4B/GTF2H5/POLR2D/ELOA/NELFCD/POLR2L/POLR2A/GTF2H1	10
R-HSA-6804758	Regulation of TP53 Activity through Acetylation	7/142	30/10955	8.41052e-08	4.13037e-07	2.16478e-07	GATAD2B/PIP4K2C/PIN1/HDAC2/TP53/ING5/BRPF3	7
R-HSA-68886	M Phase	21/142	417/10955	8.7479e-08	4.26683e-07	2.2363e-07	PSMB8/PSMB4/CDK1/PSMD5/CSNK2A2/PSMD4/RB1/PSME4/PSMA4/KMT5A/PSME3/PSMC5/PSMA6/PSMC3/PSMD7/PPP2R1B/PPP2CA/PSMD11/PSMC4/PSMC2/HSP90AA1	21
R-HSA-167152	Formation of HIV elongation complex in the absence of HIV Tat	8/142	45/10955	9.40322e-08	4.55548e-07	2.38759e-07	GTF2H4/GTF2H5/POLR2D/ELOA/NELFCD/POLR2L/POLR2A/GTF2H1	8
R-HSA-167161	HIV Transcription Initiation	8/142	47/10955	1.34216e-07	6.12987e-07	3.21275e-07	TAF1/GTF2H4/TAF4B/GTF2H5/POLR2D/POLR2L/POLR2A/GTF2H1	8
R-HSA-167162	RNA Polymerase II HIV Promoter Escape	8/142	47/10955	1.34216e-07	6.12987e-07	3.21275e-07	TAF1/GTF2H4/TAF4B/GTF2H5/POLR2D/POLR2L/POLR2A/GTF2H1	8
R-HSA-69231	Cyclin D associated events in G1	8/142	47/10955	1.34216e-07	6.12987e-07	3.21275e-07	SKP2/RB1/E2F3/CCNE2/CDKN1B/PPP2R1B/PPP2CA/CCND2	8
R-HSA-69236	G1 Phase	8/142	47/10955	1.34216e-07	6.12987e-07	3.21275e-07	SKP2/RB1/E2F3/CCNE2/CDKN1B/PPP2R1B/PPP2CA/CCND2	8
R-HSA-73776	RNA Polymerase II Promoter Escape	8/142	47/10955	1.34216e-07	6.12987e-07	3.21275e-07	TAF1/GTF2H4/TAF4B/GTF2H5/POLR2D/POLR2L/POLR2A/GTF2H1	8
R-HSA-73779	RNA Polymerase II Transcription Pre-Initiation And Promoter Opening	8/142	47/10955	1.34216e-07	6.12987e-07	3.21275e-07	TAF1/GTF2H4/TAF4B/GTF2H5/POLR2D/POLR2L/POLR2A/GTF2H1	8
R-HSA-75953	RNA Polymerase II Transcription Initiation	8/142	47/10955	1.34216e-07	6.12987e-07	3.21275e-07	TAF1/GTF2H4/TAF4B/GTF2H5/POLR2D/POLR2L/POLR2A/GTF2H1	8
R-HSA-76042	RNA Polymerase II Transcription Initiation And Promoter Clearance	8/142	47/10955	1.34216e-07	6.12987e-07	3.21275e-07	TAF1/GTF2H4/TAF4B/GTF2H5/POLR2D/POLR2L/POLR2A/GTF2H1	8
R-HSA-69002	DNA Replication Pre-Initiation	13/142	159/10955	1.34224e-07	6.12987e-07	3.21275e-07	PSMB8/PSMB4/PSMD5/PSMD4/PSMA4/PSME3/PSMC5/PSMA6/PSMC3/PSMD7/PSMD11/PSMC4/PSMC2	13
R-HSA-113418	Formation of the Early Elongation Complex	7/142	33/10955	1.70853e-07	7.7045e-07	4.03803e-07	GTF2H4/GTF2H5/POLR2D/NELFCD/POLR2L/POLR2A/GTF2H1	7
R-HSA-167158	Formation of the HIV-1 Early Elongation Complex	7/142	33/10955	1.70853e-07	7.7045e-07	4.03803e-07	GTF2H4/GTF2H5/POLR2D/NELFCD/POLR2L/POLR2A/GTF2H1	7
R-HSA-71291	Metabolism of amino acids and derivatives	19/142	376/10955	3.63575e-07	1.62927e-06	8.53923e-07	PSMB8/PSMB4/SAT1/GSR/RPL23/PSMD5/PSMD4/TXNRD1/PSME4/PSMA4/PSME3/PSMC5/PSMA6/PSMC3/PSMD7/RPS27L/PSMD11/PSMC4/PSMC2	19
R-HSA-9018519	Estrogen-dependent gene expression	12/142	149/10955	4.90797e-07	2.18573e-06	1.14557e-06	MOV10/AGO4/POLR2D/JUN/MYC/PRMT1/POLR2L/POLR2A/HSP90AA1/DDX5/BCL2/KAT2B	12
R-HSA-8951664	Neddylation	15/142	245/10955	6.23569e-07	2.75987e-06	1.44648e-06	PSMB8/PSMB4/PSMD5/PSMD4/SKP2/PSME4/PSMA4/PSME3/PSMC5/PSMA6/PSMC3/PSMD7/PSMD11/PSMC4/PSMC2	15
R-HSA-112382	Formation of RNA Pol II elongation complex	8/142	58/10955	7.25597e-07	3.17228e-06	1.66263e-06	GTF2H4/GTF2H5/POLR2D/ELOA/NELFCD/POLR2L/POLR2A/GTF2H1	8
R-HSA-75955	RNA Polymerase II Transcription Elongation	8/142	58/10955	7.25597e-07	3.17228e-06	1.66263e-06	GTF2H4/GTF2H5/POLR2D/ELOA/NELFCD/POLR2L/POLR2A/GTF2H1	8
R-HSA-167160	RNA Pol II CTD phosphorylation and interaction with CE during HIV infection	6/142	27/10955	1.00925e-06	4.35925e-06	2.28474e-06	GTF2H4/GTF2H5/POLR2D/POLR2L/POLR2A/GTF2H1	6
R-HSA-77075	RNA Pol II CTD phosphorylation and interaction with CE	6/142	27/10955	1.00925e-06	4.35925e-06	2.28474e-06	GTF2H4/GTF2H5/POLR2D/POLR2L/POLR2A/GTF2H1	6
R-HSA-8939211	ESR-mediated signaling	14/142	222/10955	1.05996e-06	4.55086e-06	2.38517e-06	MOV10/MMP2/AGO4/CDKN1B/POLR2D/JUN/MYC/PRMT1/POLR2L/POLR2A/HSP90AA1/DDX5/BCL2/KAT2B	14
R-HSA-8943724	Regulation of PTEN gene transcription	8/142	61/10955	1.07888e-06	4.60449e-06	2.41327e-06	GATAD2B/SNAI2/LAMTOR2/RRAGB/HDAC2/RPTOR/TP53/JUN	8
R-HSA-72086	mRNA Capping	6/142	29/10955	1.5854e-06	6.72623e-06	3.52531e-06	GTF2H4/GTF2H5/POLR2D/POLR2L/POLR2A/GTF2H1	6
R-HSA-9614085	FOXO-mediated transcription	8/142	65/10955	1.77027e-06	7.46635e-06	3.91322e-06	CCNG2/PCBP4/HDAC2/CDKN1B/NFYC/BCL6/BBC3/KAT2B	8
R-HSA-9659787	Aberrant regulation of mitotic G1/S transition in cancer due to RB1 defects	5/142	17/10955	1.86149e-06	7.75982e-06	4.06703e-06	RB1/E2F3/CCNE2/CDKN1B/CCND2	5
R-HSA-9661069	Defective binding of RB1 mutants to E2F1,(E2F2, E2F3)	5/142	17/10955	1.86149e-06	7.75982e-06	4.06703e-06	RB1/E2F3/CCNE2/CDKN1B/CCND2	5
R-HSA-73762	RNA Polymerase I Transcription Initiation	7/142	47/10955	2.16188e-06	8.95993e-06	4.69602e-06	GATAD2B/GTF2H4/GTF2H5/HDAC2/POLR2L/GTF2H1/KAT2B	7
R-HSA-983168	Antigen processing: Ubiquitination & Proteasome degradation	16/142	309/10955	2.38681e-06	9.83532e-06	5.15482e-06	PSMB8/PSMB4/PSMD5/PSMD4/RNF34/SKP2/PSME4/PSMA4/PSME3/PSMC5/PSMA6/PSMC3/PSMD7/PSMD11/PSMC4/PSMC2	16
R-HSA-6804760	Regulation of TP53 Activity through Methylation	5/142	19/10955	3.42561e-06	1.40352e-05	7.35604e-06	MDM4/CHEK2/PRMT5/KMT5A/TP53	5
R-HSA-2559585	Oncogene Induced Senescence	6/142	33/10955	3.54219e-06	1.44304e-05	7.56318e-06	MDM4/MOV10/AGO4/RB1/E2F3/TP53	6
R-HSA-6781823	Formation of TC-NER Pre-Incision Complex	7/142	54/10955	5.64447e-06	2.28649e-05	1.19838e-05	GTF2H4/GTF2H5/POLR2D/POLR2L/POLR2A/GTF2H1/USP7	7
R-HSA-9687139	Aberrant regulation of mitotic cell cycle due to RB1 defects	6/142	36/10955	6.03334e-06	2.43029e-05	1.27375e-05	SKP2/RB1/E2F3/CCNE2/CDKN1B/CCND2	6
R-HSA-73894	DNA Repair	16/142	335/10955	6.73213e-06	2.69661e-05	1.41333e-05	RMI2/CHEK2/EXO1/GTF2H4/ISG15/RHNO1/GTF2H5/RBBP8/TP53/POLR2D/MLH1/DNA2/POLR2L/POLR2A/GTF2H1/USP7	16
R-HSA-9675126	Diseases of mitotic cell cycle	6/142	38/10955	8.37101e-06	3.33445e-05	1.74763e-05	SKP2/RB1/E2F3/CCNE2/CDKN1B/CCND2	6
R-HSA-162599	Late Phase of HIV Life Cycle	10/142	136/10955	1.03168e-05	4.08682e-05	2.14196e-05	TAF1/GTF2H4/TAF4B/GTF2H5/POLR2D/ELOA/NELFCD/POLR2L/POLR2A/GTF2H1	10
R-HSA-6785807	Interleukin-4 and Interleukin-13 signaling	9/142	108/10955	1.05574e-05	4.15915e-05	2.17987e-05	ICAM1/MMP2/MCL1/LIF/TP53/MYC/HSP90AA1/BCL6/BCL2	9
R-HSA-203927	MicroRNA (miRNA) biogenesis	5/142	24/10955	1.18847e-05	4.65645e-05	2.44051e-05	AGO4/POLR2D/POLR2L/POLR2A/DGCR8	5
R-HSA-6803207	TP53 Regulates Transcription of Caspase Activators and Caspases	4/142	12/10955	1.23562e-05	4.81487e-05	2.52354e-05	TP63/CASP10/TP73/TP53	4
R-HSA-6782210	Gap-filling DNA repair synthesis and ligation in TC-NER	7/142	65/10955	1.97054e-05	7.63715e-05	4.00274e-05	GTF2H4/GTF2H5/POLR2D/POLR2L/POLR2A/GTF2H1/USP7	7
R-HSA-6782135	Dual incision in TC-NER	7/142	66/10955	2.18069e-05	8.40619e-05	4.4058e-05	GTF2H4/GTF2H5/POLR2D/POLR2L/POLR2A/GTF2H1/USP7	7
R-HSA-162587	HIV Life Cycle	10/142	149/10955	2.29655e-05	8.80551e-05	4.61509e-05	TAF1/GTF2H4/TAF4B/GTF2H5/POLR2D/ELOA/NELFCD/POLR2L/POLR2A/GTF2H1	10
R-HSA-4839735	Signaling by AXIN mutants	4/142	14/10955	2.44871e-05	9.09704e-05	4.76788e-05	CSNK1A1/PPP2R1B/PPP2CA/APC	4
R-HSA-4839744	Signaling by APC mutants	4/142	14/10955	2.44871e-05	9.09704e-05	4.76788e-05	CSNK1A1/PPP2R1B/PPP2CA/APC	4
R-HSA-4839748	Signaling by AMER1 mutants	4/142	14/10955	2.44871e-05	9.09704e-05	4.76788e-05	CSNK1A1/PPP2R1B/PPP2CA/APC	4
R-HSA-5467337	APC truncation mutants have impaired AXIN binding	4/142	14/10955	2.44871e-05	9.09704e-05	4.76788e-05	CSNK1A1/PPP2R1B/PPP2CA/APC	4
R-HSA-5467340	AXIN missense mutants destabilize the destruction complex	4/142	14/10955	2.44871e-05	9.09704e-05	4.76788e-05	CSNK1A1/PPP2R1B/PPP2CA/APC	4
R-HSA-5467348	Truncations of AMER1 destabilize the destruction complex	4/142	14/10955	2.44871e-05	9.09704e-05	4.76788e-05	CSNK1A1/PPP2R1B/PPP2CA/APC	4
R-HSA-69473	G2/M DNA damage checkpoint	8/142	94/10955	2.84701e-05	0.000105222	5.51483e-05	RMI2/CHEK2/EXO1/CDK1/RHNO1/RBBP8/TP53/DNA2	8
R-HSA-9006931	Signaling by Nuclear Receptors	14/142	298/10955	3.14583e-05	0.00011567	6.0624e-05	MOV10/MMP2/AGO4/CDKN1B/POLR2D/JUN/MYC/PRMT1/POLR2L/POLR2A/HSP90AA1/DDX5/BCL2/KAT2B	14
R-HSA-4839743	Signaling by CTNNB1 phospho-site mutants	4/142	15/10955	3.30561e-05	0.000117798	6.17396e-05	CSNK1A1/PPP2R1B/PPP2CA/APC	4
R-HSA-5339716	Signaling by GSK3beta mutants	4/142	15/10955	3.30561e-05	0.000117798	6.17396e-05	CSNK1A1/PPP2R1B/PPP2CA/APC	4
R-HSA-5358747	CTNNB1 S33 mutants aren't phosphorylated	4/142	15/10955	3.30561e-05	0.000117798	6.17396e-05	CSNK1A1/PPP2R1B/PPP2CA/APC	4
R-HSA-5358749	CTNNB1 S37 mutants aren't phosphorylated	4/142	15/10955	3.30561e-05	0.000117798	6.17396e-05	CSNK1A1/PPP2R1B/PPP2CA/APC	4
R-HSA-5358751	CTNNB1 S45 mutants aren't phosphorylated	4/142	15/10955	3.30561e-05	0.000117798	6.17396e-05	CSNK1A1/PPP2R1B/PPP2CA/APC	4
R-HSA-5358752	CTNNB1 T41 mutants aren't phosphorylated	4/142	15/10955	3.30561e-05	0.000117798	6.17396e-05	CSNK1A1/PPP2R1B/PPP2CA/APC	4
R-HSA-983169	Class I MHC mediated antigen processing & presentation	16/142	381/10955	3.31872e-05	0.000117798	6.17396e-05	PSMB8/PSMB4/PSMD5/PSMD4/RNF34/SKP2/PSME4/PSMA4/PSME3/PSMC5/PSMA6/PSMC3/PSMD7/PSMD11/PSMC4/PSMC2	16
R-HSA-167238	Pausing and recovery of Tat-mediated HIV elongation	5/142	31/10955	4.41651e-05	0.000155227	8.13567e-05	POLR2D/ELOA/NELFCD/POLR2L/POLR2A	5
R-HSA-167243	Tat-mediated HIV elongation arrest and recovery	5/142	31/10955	4.41651e-05	0.000155227	8.13567e-05	POLR2D/ELOA/NELFCD/POLR2L/POLR2A	5
R-HSA-9675135	Diseases of DNA repair	6/142	51/10955	4.7554e-05	0.000166323	8.71722e-05	RMI2/EXO1/RHNO1/RBBP8/MLH1/DNA2	6
R-HSA-196299	Beta-catenin phosphorylation cascade	4/142	17/10955	5.64847e-05	0.00019565	0.000102543	CSNK1A1/PPP2R1B/PPP2CA/APC	4
R-HSA-9818027	NFE2L2 regulating anti-oxidant/detoxification enzymes	4/142	17/10955	5.64847e-05	0.00019565	0.000102543	GSR/TXNRD1/SLC7A11/PRDX1	4
R-HSA-167287	HIV elongation arrest and recovery	5/142	33/10955	6.04191e-05	0.000206288	0.000108118	POLR2D/ELOA/NELFCD/POLR2L/POLR2A	5
R-HSA-167290	Pausing and recovery of HIV elongation	5/142	33/10955	6.04191e-05	0.000206288	0.000108118	POLR2D/ELOA/NELFCD/POLR2L/POLR2A	5
R-HSA-9022692	Regulation of MECP2 expression and activity	5/142	33/10955	6.04191e-05	0.000206288	0.000108118	MOV10/AGO4/HDAC2/HIPK2/HTT	5
R-HSA-1632852	Macroautophagy	9/142	136/10955	6.64978e-05	0.000225966	0.000118432	PRKAB2/PRKAG1/LAMTOR2/CSNK2A2/RRAGB/RPTOR/PRKAG2/TSC1/HSP90AA1	9
R-HSA-4791275	Signaling by WNT in cancer	5/142	34/10955	7.01024e-05	0.000237092	0.000124263	DKK1/CSNK1A1/PPP2R1B/PPP2CA/APC	5
R-HSA-6781827	Transcription-Coupled Nucleotide Excision Repair (TC-NER)	7/142	79/10955	7.05599e-05	0.000237518	0.000124487	GTF2H4/GTF2H5/POLR2D/POLR2L/POLR2A/GTF2H1/USP7	7
R-HSA-6804114	TP53 Regulates Transcription of Genes Involved in G2 Cell Cycle Arrest	4/142	18/10955	7.18945e-05	0.00024088	0.000126249	CDK1/BAX/TP53/PRMT1	4
R-HSA-9709570	Impaired BRCA2 binding to RAD51	5/142	35/10955	8.09392e-05	0.000269923	0.00014147	RMI2/EXO1/RHNO1/RBBP8/DNA2	5
R-HSA-5685938	HDR through Single Strand Annealing (SSA)	5/142	37/10955	0.000106442	0.000353328	0.000185184	RMI2/EXO1/RHNO1/RBBP8/DNA2	5
R-HSA-5218859	Regulated Necrosis	6/142	60/10955	0.000120143	0.00039697	0.000208057	CASP8/TP63/BAX/TP53/HSP90AA1/TNFRSF10B	6
R-HSA-8986944	Transcriptional Regulation by MECP2	6/142	62/10955	0.000144428	0.000475024	0.000248966	MOV10/AGO4/HDAC2/HIPK2/HTT/DGCR8	6
R-HSA-9612973	Autophagy	9/142	151/10955	0.000148746	0.000486992	0.000255239	PRKAB2/PRKAG1/LAMTOR2/CSNK2A2/RRAGB/RPTOR/PRKAG2/TSC1/HSP90AA1	9
R-HSA-5693616	Presynaptic phase of homologous DNA pairing and strand exchange	5/142	40/10955	0.000155744	0.000507584	0.000266032	RMI2/EXO1/RHNO1/RBBP8/DNA2	5
R-HSA-113510	E2F mediated regulation of DNA replication	4/142	22/10955	0.000165076	0.000535564	0.000280696	CDK1/RB1/PPP2R1B/PPP2CA	4
R-HSA-9675136	Diseases of DNA Double-Strand Break Repair	5/142	41/10955	0.000175541	0.000564408	0.000295814	RMI2/EXO1/RHNO1/RBBP8/DNA2	5
R-HSA-9701190	Defective homologous recombination repair (HRR) due to BRCA2 loss of function	5/142	41/10955	0.000175541	0.000564408	0.000295814	RMI2/EXO1/RHNO1/RBBP8/DNA2	5
R-HSA-167242	Abortive elongation of HIV-1 transcript in the absence of Tat	4/142	23/10955	0.000197827	0.000633225	0.000331882	POLR2D/NELFCD/POLR2L/POLR2A	4
R-HSA-5693579	Homologous DNA Pairing and Strand Exchange	5/142	43/10955	0.000220845	0.000703758	0.000368849	RMI2/EXO1/RHNO1/RBBP8/DNA2	5
R-HSA-2559583	Cellular Senescence	10/142	196/10955	0.000229257	0.000727334	0.000381206	MDM4/MOV10/AGO4/RB1/E2F3/CCNE2/CDKN1B/TP53/JUN/MAP4K4	10
R-HSA-166208	mTORC1-mediated signalling	4/142	24/10955	0.000235016	0.000735836	0.000385662	LAMTOR2/RRAGB/RPTOR/AKT1S1	4
R-HSA-3371571	HSF1-dependent transactivation	4/142	24/10955	0.000235016	0.000735836	0.000385662	HSPA1A/RPTOR/AKT1S1/HSP90AA1	4
R-HSA-9709603	Impaired BRCA2 binding to PALB2	4/142	24/10955	0.000235016	0.000735836	0.000385662	RMI2/EXO1/RBBP8/DNA2	4
R-HSA-2151209	Activation of PPARGC1A (PGC-1alpha) by phosphorylation	3/142	10/10955	0.000239371	0.000742984	0.000389408	PRKAB2/PRKAG1/PRKAG2	3
R-HSA-2465910	MASTL Facilitates Mitotic Progression	3/142	10/10955	0.000239371	0.000742984	0.000389408	CDK1/PPP2R1B/PPP2CA	3
R-HSA-9701192	Defective homologous recombination repair (HRR) due to BRCA1 loss of function	4/142	25/10955	0.000276981	0.000845086	0.000442921	RMI2/EXO1/RBBP8/DNA2	4
R-HSA-9701193	Defective homologous recombination repair (HRR) due to PALB2 loss of function	4/142	25/10955	0.000276981	0.000845086	0.000442921	RMI2/EXO1/RBBP8/DNA2	4
R-HSA-9704331	Defective HDR through Homologous Recombination Repair (HRR) due to PALB2 loss of BRCA1 binding function	4/142	25/10955	0.000276981	0.000845086	0.000442921	RMI2/EXO1/RBBP8/DNA2	4
R-HSA-9704646	Defective HDR through Homologous Recombination Repair (HRR) due to PALB2 loss of BRCA2/RAD51/RAD51C binding function	4/142	25/10955	0.000276981	0.000845086	0.000442921	RMI2/EXO1/RBBP8/DNA2	4
R-HSA-5693554	Resolution of D-loop Structures through Synthesis-Dependent Strand Annealing (SDSA)	4/142	27/10955	0.00037662	0.00114422	0.000599703	RMI2/EXO1/RBBP8/DNA2	4
R-HSA-5601884	PIWI-interacting RNA (piRNA) biogenesis	4/142	29/10955	0.000499554	0.00151131	0.000792098	POLR2D/POLR2L/POLR2A/HSP90AA1	4
R-HSA-73854	RNA Polymerase I Promoter Clearance	7/142	109/10955	0.000525444	0.00158296	0.000829648	GATAD2B/GTF2H4/GTF2H5/HDAC2/POLR2L/GTF2H1/KAT2B	7
R-HSA-113501	Inhibition of replication initiation of damaged DNA by RB1/E2F1	3/142	13/10955	0.000554438	0.00166331	0.000871766	RB1/PPP2R1B/PPP2CA	3
R-HSA-5696398	Nucleotide Excision Repair	7/142	111/10955	0.000586218	0.00174406	0.000914085	GTF2H4/GTF2H5/POLR2D/POLR2L/POLR2A/GTF2H1/USP7	7
R-HSA-73864	RNA Polymerase I Transcription	7/142	111/10955	0.000586218	0.00174406	0.000914085	GATAD2B/GTF2H4/GTF2H5/HDAC2/POLR2L/GTF2H1/KAT2B	7
R-HSA-4641262	Disassembly of the destruction complex and recruitment of AXIN to the membrane	4/142	31/10955	0.000648648	0.00192182	0.00100725	CSNK1A1/PPP2R1B/PPP2CA/APC	4
R-HSA-9639288	Amino acids regulate mTORC1	5/142	55/10955	0.00070472	0.00207936	0.00108982	LAMTOR2/RRAGB/RPTOR/SESN2/SESN1	5
R-HSA-73863	RNA Polymerase I Transcription Termination	4/142	32/10955	0.000733912	0.00215662	0.00113031	GTF2H4/GTF2H5/POLR2L/GTF2H1	4
R-HSA-5693568	Resolution of D-loop Structures through Holliday Junction Intermediates	4/142	34/10955	0.000927701	0.00271495	0.00142294	RMI2/EXO1/RBBP8/DNA2	4
R-HSA-168255	Influenza Infection	8/142	157/10955	0.000986456	0.00287516	0.00150691	ISG15/HSPA1A/RPL23/POLR2D/RPS27L/POLR2L/POLR2A/HSP90AA1	8
R-HSA-5693537	Resolution of D-Loop Structures	4/142	35/10955	0.00103696	0.00301012	0.00157765	RMI2/EXO1/RBBP8/DNA2	4
R-HSA-9614657	FOXO-mediated transcription of cell death genes	3/142	16/10955	0.0010551	0.00305043	0.00159877	NFYC/BCL6/BBC3	3
R-HSA-2559580	Oxidative Stress Induced Senescence	7/142	124/10955	0.00113039	0.00325498	0.00170598	MDM4/MOV10/AGO4/E2F3/TP53/JUN/MAP4K4	7
R-HSA-1912408	Pre-NOTCH Transcription and Translation	6/142	92/10955	0.0012197	0.00349809	0.0018334	MOV10/AGO4/E2F3/TP53/JUN/KAT2B	6
R-HSA-8934593	Regulation of RUNX1 Expression and Activity	3/142	17/10955	0.00126909	0.00361086	0.0018925	MOV10/AGO4/CCND2	3
R-HSA-9617828	FOXO-mediated transcription of cell cycle genes	3/142	17/10955	0.00126909	0.00361086	0.0018925	CCNG2/PCBP4/CDKN1B	3
R-HSA-3299685	Detoxification of Reactive Oxygen Species	4/142	37/10955	0.00128205	0.00363331	0.00190427	GSR/PRDX5/TXNRD1/PRDX1	4
R-HSA-8851708	Signaling by FGFR2 IIIa TM	3/142	19/10955	0.00177447	0.00500904	0.00262531	POLR2D/POLR2L/POLR2A	3
R-HSA-5685942	HDR through Homologous Recombination (HRR)	5/142	68/10955	0.00184617	0.005191	0.00272067	RMI2/EXO1/RHNO1/RBBP8/DNA2	5
R-HSA-6804115	TP53 regulates transcription of additional cell cycle genes whose exact role in the p53 pathway remain uncertain	3/142	20/10955	0.00206793	0.00579181	0.00303557	PLAGL1/TP53/CNOT7	3
R-HSA-1912422	Pre-NOTCH Expression and Processing	6/142	108/10955	0.00276553	0.00771549	0.0040438	MOV10/AGO4/E2F3/TP53/JUN/KAT2B	6
R-HSA-3247509	Chromatin modifying enzymes	10/142	272/10955	0.00282376	0.00781713	0.00409706	GATAD2B/PHF20/HDAC2/PRMT5/KMT5A/TRRAP/PRMT1/ING5/BRPF3/KAT2B	10
R-HSA-4839726	Chromatin organization	10/142	272/10955	0.00282376	0.00781713	0.00409706	GATAD2B/PHF20/HDAC2/PRMT5/KMT5A/TRRAP/PRMT1/ING5/BRPF3/KAT2B	10
R-HSA-212165	Epigenetic regulation of gene expression	8/142	188/10955	0.00307616	0.0084831	0.00444611	GATAD2B/GTF2H4/PHF20/GTF2H5/HDAC2/POLR2L/GTF2H1/KAT2B	8
R-HSA-9009391	Extra-nuclear estrogen signaling	5/142	77/10955	0.00318927	0.00876132	0.00459193	MMP2/CDKN1B/PRMT1/HSP90AA1/BCL2	5
R-HSA-9663891	Selective autophagy	5/142	81/10955	0.00396907	0.010767	0.00564311	PRKAB2/PRKAG1/CSNK2A2/PRKAG2/HSP90AA1	5
R-HSA-5674400	Constitutive Signaling by AKT1 E17K in Cancer	3/142	25/10955	0.00397942	0.010767	0.00564311	PRR5/CDKN1B/AKT1S1	3
R-HSA-69273	Cyclin A/B1/B2 associated events during G2/M transition	3/142	25/10955	0.00397942	0.010767	0.00564311	CDK1/PPP2R1B/PPP2CA	3
R-HSA-9734009	Defective Intrinsic Pathway for Apoptosis	3/142	25/10955	0.00397942	0.010767	0.00564311	TP53/JUN/PRDX1	3
R-HSA-168928	DDX58/IFIH1-mediated induction of interferon-alpha/beta	5/142	82/10955	0.00418358	0.0112768	0.00591032	ISG15/CASP8/CASP10/PIN1/HSP90AA1	5
R-HSA-9711097	Cellular response to starvation	7/142	157/10955	0.00430097	0.0115498	0.0060534	LAMTOR2/RPL23/RRAGB/RPTOR/SESN2/SESN1/RPS27L	7
R-HSA-6803529	FGFR2 alternative splicing	3/142	26/10955	0.00445621	0.011922	0.00624849	POLR2D/POLR2L/POLR2A	3
R-HSA-1538133	G0 and Early G1	3/142	27/10955	0.00496616	0.0131879	0.00691196	CDK1/CCNE2/MYC	3
R-HSA-201556	Signaling by ALK	3/142	27/10955	0.00496616	0.0131879	0.00691196	PRDM1/HDAC2/MYC	3
R-HSA-5620971	Pyroptosis	3/142	28/10955	0.00550989	0.0145778	0.00764044	TP63/BAX/TP53	3
R-HSA-9619483	Activation of AMPK downstream of NMDARs	3/142	29/10955	0.00608801	0.0160482	0.00841107	PRKAB2/PRKAG1/PRKAG2	3
R-HSA-5693532	DNA Double-Strand Break Repair	7/142	168/10955	0.006202	0.0162888	0.00853717	RMI2/CHEK2/EXO1/RHNO1/RBBP8/TP53/DNA2	7
R-HSA-9701898	STAT3 nuclear events downstream of ALK signaling	2/142	10/10955	0.00701306	0.0183517	0.00961838	PRDM1/HDAC2	2
R-HSA-450282	MAPK targets/ Nuclear events mediated by MAP kinases	3/142	31/10955	0.00734952	0.0191622	0.0100432	JUN/PPP2R1B/PPP2CA	3
R-HSA-8936459	RUNX1 regulates genes involved in megakaryocyte differentiation and platelet function	5/142	95/10955	0.00777478	0.0201975	0.0105858	MOV10/AGO4/PRMT1/KAT2B/THBS1	5
R-HSA-5213460	RIPK1-mediated regulated necrosis	3/142	32/10955	0.0080339	0.0207205	0.0108599	CASP8/HSP90AA1/TNFRSF10B	3
R-HSA-5675482	Regulation of necroptotic cell death	3/142	32/10955	0.0080339	0.0207205	0.0108599	CASP8/HSP90AA1/TNFRSF10B	3
R-HSA-168273	Influenza Viral RNA Transcription and Replication	6/142	136/10955	0.00846842	0.0212329	0.0111284	RPL23/POLR2D/RPS27L/POLR2L/POLR2A/HSP90AA1	6
R-HSA-168142	Toll Like Receptor 10 (TLR10) Cascade	5/142	97/10955	0.00847251	0.0212329	0.0111284	CASP8/TP53/JUN/PPP2R1B/PPP2CA	5
R-HSA-168176	Toll Like Receptor 5 (TLR5) Cascade	5/142	97/10955	0.00847251	0.0212329	0.0111284	CASP8/TP53/JUN/PPP2R1B/PPP2CA	5
R-HSA-5693607	Processing of DNA double-strand break ends	5/142	97/10955	0.00847251	0.0212329	0.0111284	RMI2/EXO1/RHNO1/RBBP8/DNA2	5
R-HSA-975871	MyD88 cascade initiated on plasma membrane	5/142	97/10955	0.00847251	0.0212329	0.0111284	CASP8/TP53/JUN/PPP2R1B/PPP2CA	5
R-HSA-2514853	Condensation of Prometaphase Chromosomes	2/142	11/10955	0.00849907	0.0212329	0.0111284	CDK1/CSNK2A2	2
R-HSA-3371378	Regulation by c-FLIP	2/142	11/10955	0.00849907	0.0212329	0.0111284	CASP8/TNFRSF10B	2
R-HSA-5218900	CASP8 activity is inhibited	2/142	11/10955	0.00849907	0.0212329	0.0111284	CASP8/TNFRSF10B	2
R-HSA-69416	Dimerization of procaspase-8	2/142	11/10955	0.00849907	0.0212329	0.0111284	CASP8/TNFRSF10B	2
R-HSA-1839126	FGFR2 mutant receptor activation	3/142	33/10955	0.0087546	0.0217438	0.0113962	POLR2D/POLR2L/POLR2A	3
R-HSA-211000	Gene Silencing by RNA	6/142	137/10955	0.00876422	0.0217438	0.0113962	AGO4/POLR2D/POLR2L/POLR2A/HSP90AA1/DGCR8	6
R-HSA-9634600	Regulation of glycolysis by fructose 2,6-bisphosphate metabolism	2/142	12/10955	0.0101128	0.025003	0.0131044	PPP2R1B/PPP2CA	2
R-HSA-975138	TRAF6 mediated induction of NFkB and MAP kinases upon TLR7/8 or 9 activation	5/142	103/10955	0.0108241	0.0266697	0.013978	CASP8/TP53/JUN/PPP2R1B/PPP2CA	5
R-HSA-975155	MyD88 dependent cascade initiated on endosome	5/142	104/10955	0.0112553	0.0276371	0.014485	CASP8/TP53/JUN/PPP2R1B/PPP2CA	5
R-HSA-168164	Toll Like Receptor 3 (TLR3) Cascade	5/142	105/10955	0.011698	0.0285131	0.0149441	CASP8/TP53/JUN/PPP2R1B/PPP2CA	5
R-HSA-168181	Toll Like Receptor 7/8 (TLR7/8) Cascade	5/142	105/10955	0.011698	0.0285131	0.0149441	CASP8/TP53/JUN/PPP2R1B/PPP2CA	5
R-HSA-202670	ERKs are inactivated	2/142	13/10955	0.0118507	0.0285131	0.0149441	PPP2R1B/PPP2CA	2
R-HSA-75035	Chk1/Chk2(Cds1) mediated inactivation of Cyclin B:Cdk1 complex	2/142	13/10955	0.0118507	0.0285131	0.0149441	CHEK2/CDK1	2
R-HSA-933543	NF-kB activation through FADD/RIP-1 pathway mediated by caspase-8 and -10	2/142	13/10955	0.0118507	0.0285131	0.0149441	CASP8/CASP10	2
R-HSA-9768759	Regulation of NPAS4 gene expression	2/142	13/10955	0.0118507	0.0285131	0.0149441	MOV10/AGO4	2
R-HSA-427413	NoRC negatively regulates rRNA expression	5/142	106/10955	0.0121525	0.0291416	0.0152735	GTF2H4/GTF2H5/HDAC2/POLR2L/GTF2H1	5
R-HSA-168138	Toll Like Receptor 9 (TLR9) Cascade	5/142	108/10955	0.0130971	0.0313021	0.0164059	CASP8/TP53/JUN/PPP2R1B/PPP2CA	5
R-HSA-5250941	Negative epigenetic regulation of rRNA expression	5/142	109/10955	0.0135875	0.0320181	0.0167811	GTF2H4/GTF2H5/HDAC2/POLR2L/GTF2H1	5
R-HSA-198323	AKT phosphorylates targets in the cytosol	2/142	14/10955	0.0137093	0.0320181	0.0167811	CDKN1B/AKT1S1	2
R-HSA-200425	Carnitine metabolism	2/142	14/10955	0.0137093	0.0320181	0.0167811	PRKAB2/PRKAG2	2
R-HSA-3371568	Attenuation phase	2/142	14/10955	0.0137093	0.0320181	0.0167811	HSPA1A/HSP90AA1	2
R-HSA-5358565	Mismatch repair (MMR) directed by MSH2:MSH6 (MutSalpha)	2/142	14/10955	0.0137093	0.0320181	0.0167811	EXO1/MLH1	2
R-HSA-5358606	Mismatch repair (MMR) directed by MSH2:MSH3 (MutSbeta)	2/142	14/10955	0.0137093	0.0320181	0.0167811	EXO1/MLH1	2
R-HSA-5578768	Physiological factors	2/142	14/10955	0.0137093	0.0320181	0.0167811	HIPK2/KAT2B	2
R-HSA-5689896	Ovarian tumor domain proteases	3/142	39/10955	0.0138618	0.0321649	0.016858	CDK1/TP53/APC	3
R-HSA-8853884	Transcriptional Regulation by VENTX	3/142	39/10955	0.0138618	0.0321649	0.016858	MOV10/AGO4/TP53	3
R-HSA-166166	MyD88-independent TLR4 cascade	5/142	110/10955	0.0140902	0.0324846	0.0170256	CASP8/TP53/JUN/PPP2R1B/PPP2CA	5
R-HSA-937061	TRIF(TICAM1)-mediated TLR4 signaling	5/142	110/10955	0.0140902	0.0324846	0.0170256	CASP8/TP53/JUN/PPP2R1B/PPP2CA	5
R-HSA-5654738	Signaling by FGFR2	4/142	73/10955	0.0147733	0.0339503	0.0177938	POLR2D/PPP2CA/POLR2L/POLR2A	4
R-HSA-166058	MyD88:MAL(TIRAP) cascade initiated on plasma membrane	5/142	113/10955	0.0156731	0.0353658	0.0185357	CASP8/TP53/JUN/PPP2R1B/PPP2CA	5
R-HSA-168188	Toll Like Receptor TLR6:TLR2 Cascade	5/142	113/10955	0.0156731	0.0353658	0.0185357	CASP8/TP53/JUN/PPP2R1B/PPP2CA	5
R-HSA-111447	Activation of BAD and translocation to mitochondria	2/142	15/10955	0.0156852	0.0353658	0.0185357	BID/BCL2	2
R-HSA-2032785	YAP1- and WWTR1 (TAZ)-stimulated gene expression	2/142	15/10955	0.0156852	0.0353658	0.0185357	HIPK2/KAT2B	2
R-HSA-5358508	Mismatch Repair	2/142	15/10955	0.0156852	0.0353658	0.0185357	EXO1/MLH1	2
R-HSA-9694631	Maturation of nucleoprotein	2/142	15/10955	0.0156852	0.0353658	0.0185357	CSNK1A1/PRMT1	2
R-HSA-5696400	Dual Incision in GG-NER	3/142	41/10955	0.0158691	0.0356683	0.0186942	GTF2H4/GTF2H5/GTF2H1	3
R-HSA-168179	Toll Like Receptor TLR1:TLR2 Cascade	5/142	116/10955	0.0173706	0.0387998	0.0203355	CASP8/TP53/JUN/PPP2R1B/PPP2CA	5
R-HSA-181438	Toll Like Receptor 2 (TLR2) Cascade	5/142	116/10955	0.0173706	0.0387998	0.0203355	CASP8/TP53/JUN/PPP2R1B/PPP2CA	5
R-HSA-2559584	Formation of Senescence-Associated Heterochromatin Foci (SAHF)	2/142	16/10955	0.0177753	0.0395803	0.0207446	RB1/TP53	2
R-HSA-168325	Viral Messenger RNA Synthesis	3/142	43/10955	0.0180315	0.0396582	0.0207854	POLR2D/POLR2L/POLR2A	3
R-HSA-5655253	Signaling by FGFR2 in disease	3/142	43/10955	0.0180315	0.0396582	0.0207854	POLR2D/POLR2L/POLR2A	3
R-HSA-5675221	Negative regulation of MAPK pathway	3/142	43/10955	0.0180315	0.0396582	0.0207854	PPP2R1B/PPP2CA/DUSP1	3
R-HSA-5696395	Formation of Incision Complex in GG-NER	3/142	43/10955	0.0180315	0.0396582	0.0207854	GTF2H4/GTF2H5/GTF2H1	3
R-HSA-2559586	DNA Damage/Telomere Stress Induced Senescence	4/142	79/10955	0.0192232	0.04215	0.0220914	RB1/CCNE2/CDKN1B/TP53	4
R-HSA-140534	Caspase activation via Death Receptors in the presence of ligand	2/142	17/10955	0.0199761	0.0435345	0.022817	CASP8/TNFRSF10B	2
R-HSA-432142	Platelet sensitization by LDL	2/142	17/10955	0.0199761	0.0435345	0.022817	PPP2R1B/PPP2CA	2
R-HSA-9758274	Regulation of NF-kappa B signaling	2/142	18/10955	0.0222845	0.0484182	0.0253766	CASP8/TP53	2
R-HSA-2122947	NOTCH1 Intracellular Domain Regulates Transcription	3/142	48/10955	0.0241204	0.0522487	0.0273842	HDAC2/MYC/KAT2B	3
R-HSA-2995383	Initiation of Nuclear Envelope (NE) Reformation	2/142	19/10955	0.0246975	0.0533376	0.027955	CDK1/PPP2CA	2
R-HSA-190236	Signaling by FGFR	4/142	87/10955	0.026327	0.056686	0.0297099	POLR2D/PPP2CA/POLR2L/POLR2A	4
R-HSA-72165	mRNA Splicing - Minor Pathway	3/142	50/10955	0.0268297	0.0575955	0.0301866	POLR2D/POLR2L/POLR2A	3
R-HSA-9687136	Aberrant regulation of mitotic exit in cancer due to RB1 defects	2/142	20/10955	0.0272119	0.0582415	0.0305252	SKP2/RB1	2
R-HSA-3371556	Cellular response to heat stress	4/142	89/10955	0.0283182	0.0604291	0.0316717	HSPA1A/RPTOR/AKT1S1/HSP90AA1	4
R-HSA-5693567	HDR through Homologous Recombination (HRR) or Single Strand Annealing (SSA)	5/142	132/10955	0.0284815	0.0605972	0.0317598	RMI2/EXO1/RHNO1/RBBP8/DNA2	5
R-HSA-73772	RNA Polymerase I Promoter Escape	4/142	90/10955	0.0293467	0.0622531	0.0326277	GTF2H4/GTF2H5/POLR2L/GTF2H1	4
R-HSA-389513	CTLA4 inhibitory signaling	2/142	21/10955	0.0298247	0.0630806	0.0330614	PPP2R1B/PPP2CA	2
R-HSA-198753	ERK/MAPK targets	2/142	22/10955	0.0325331	0.0682053	0.0357473	PPP2R1B/PPP2CA	2
R-HSA-8862803	Deregulated CDK5 triggers multiple neurodegenerative pathways in Alzheimer's disease models	2/142	22/10955	0.0325331	0.0682053	0.0357473	JUN/PRDX1	2
R-HSA-8863678	Neurodegenerative Diseases	2/142	22/10955	0.0325331	0.0682053	0.0357473	JUN/PRDX1	2
R-HSA-5693538	Homology Directed Repair	5/142	138/10955	0.0335907	0.0702174	0.0368019	RMI2/EXO1/RHNO1/RBBP8/DNA2	5
R-HSA-112409	RAF-independent MAPK1/3 activation	2/142	23/10955	0.0353341	0.0736469	0.0385993	CDK1/DUSP1	2
R-HSA-68875	Mitotic Prophase	5/142	141/10955	0.0363461	0.0755367	0.0395898	CDK1/RB1/KMT5A/PPP2R1B/PPP2CA	5
R-HSA-3214847	HATs acetylate histones	5/142	142/10955	0.0372947	0.0772841	0.0405056	PHF20/TRRAP/ING5/BRPF3/KAT2B	5
R-HSA-9634638	Estrogen-dependent nuclear events downstream of ESR-membrane signaling	2/142	24/10955	0.0382249	0.0789834	0.0413963	CDKN1B/BCL2	2
R-HSA-2644602	Signaling by NOTCH1 PEST Domain Mutants in Cancer	3/142	58/10955	0.0392187	0.0798859	0.0418693	HDAC2/MYC/KAT2B	3
R-HSA-2644603	Signaling by NOTCH1 in Cancer	3/142	58/10955	0.0392187	0.0798859	0.0418693	HDAC2/MYC/KAT2B	3
R-HSA-2644606	Constitutive Signaling by NOTCH1 PEST Domain Mutants	3/142	58/10955	0.0392187	0.0798859	0.0418693	HDAC2/MYC/KAT2B	3
R-HSA-2894858	Signaling by NOTCH1 HD+PEST Domain Mutants in Cancer	3/142	58/10955	0.0392187	0.0798859	0.0418693	HDAC2/MYC/KAT2B	3
R-HSA-2894862	Constitutive Signaling by NOTCH1 HD+PEST Domain Mutants	3/142	58/10955	0.0392187	0.0798859	0.0418693	HDAC2/MYC/KAT2B	3
R-HSA-5357786	TNFR1-induced proapoptotic signaling	2/142	25/10955	0.0412027	0.0835298	0.0437791	USP2/CASP8	2
R-HSA-166016	Toll Like Receptor 4 (TLR4) Cascade	5/142	146/10955	0.0412406	0.0835298	0.0437791	CASP8/TP53/JUN/PPP2R1B/PPP2CA	5
R-HSA-180024	DARPP-32 events	2/142	26/10955	0.044265	0.0894027	0.0468572	PPP2R1B/PPP2CA	2
R-HSA-9645723	Diseases of programmed cell death	4/142	104/10955	0.0460682	0.0927835	0.0486291	CASP8/TP53/JUN/PRDX1	4
R-HSA-5357769	Caspase activation via extrinsic apoptotic signalling pathway	2/142	27/10955	0.0474089	0.0949914	0.0497863	CASP8/TNFRSF10B	2
R-HSA-5250913	Positive epigenetic regulation of rRNA expression	4/142	105/10955	0.0474294	0.0949914	0.0497863	GATAD2B/HDAC2/POLR2L/KAT2B	4
R-HSA-1226099	Signaling by FGFR in disease	3/142	63/10955	0.0481975	0.0962608	0.0504516	POLR2D/POLR2L/POLR2A	3
R-HSA-73887	Death Receptor Signaling	5/142	154/10955	0.0498675	0.0993194	0.0520546	USP2/CASP8/CASP10/HDAC2/TNFRSF10B	5
R-HSA-450294	MAP kinase activation	3/142	64/10955	0.0501043	0.0995146	0.052157	JUN/PPP2R1B/PPP2CA	3
R-HSA-350054	Notch-HLH transcription pathway	2/142	28/10955	0.0506319	0.100285	0.0525606	HDAC2/KAT2B	2
R-HSA-163685	Integration of energy metabolism	4/142	108/10955	0.0516462	0.102012	0.0534658	PRKAB2/PRKAG2/PPP2R1B/PPP2CA	4
R-HSA-5218920	VEGFR2 mediated vascular permeability	2/142	29/10955	0.0539314	0.106233	0.0556782	PRR5/HSP90AA1	2
R-HSA-9670095	Inhibition of DNA recombination at telomere	3/142	67/10955	0.0560418	0.110088	0.0576984	POLR2D/POLR2L/POLR2A	3
R-HSA-499943	Interconversion of nucleotide di- and triphosphates	2/142	30/10955	0.057305	0.112261	0.0588378	GSR/TXNRD1	2
R-HSA-157579	Telomere Maintenance	4/142	112/10955	0.0575778	0.112488	0.0589567	POLR2D/DNA2/POLR2L/POLR2A	4
R-HSA-388841	Costimulation by the CD28 family	3/142	69/10955	0.0601781	0.117249	0.0614519	PRR5/PPP2R1B/PPP2CA	3
R-HSA-5339562	Uptake and actions of bacterial toxins	2/142	31/10955	0.0607502	0.118043	0.061868	TXNRD1/HSP90AA1	2
R-HSA-1445148	Translocation of SLC2A4 (GLUT4) to the plasma membrane	3/142	72/10955	0.0666429	0.128795	0.0675032	PRKAB2/PRKAG1/PRKAG2	3
R-HSA-448424	Interleukin-17 signaling	3/142	72/10955	0.0666429	0.128795	0.0675032	JUN/PPP2R1B/PPP2CA	3
R-HSA-168898	Toll-like Receptor Cascades	5/142	168/10955	0.0673419	0.129796	0.0680279	CASP8/TP53/JUN/PPP2R1B/PPP2CA	5
R-HSA-2408522	Selenoamino acid metabolism	4/142	119/10955	0.0687982	0.131672	0.0690108	GSR/RPL23/TXNRD1/RPS27L	4
R-HSA-2299718	Condensation of Prophase Chromosomes	3/142	73/10955	0.0688659	0.131672	0.0690108	CDK1/RB1/KMT5A	3
R-HSA-70171	Glycolysis	3/142	73/10955	0.0688659	0.131672	0.0690108	GPI/PPP2R1B/PPP2CA	3
R-HSA-1980143	Signaling by NOTCH1	3/142	74/10955	0.0711223	0.135264	0.0708939	HDAC2/MYC/KAT2B	3
R-HSA-6807505	RNA polymerase II transcribes snRNA genes	3/142	74/10955	0.0711223	0.135264	0.0708939	POLR2D/POLR2L/POLR2A	3
R-HSA-9634815	Transcriptional Regulation by NPAS4	2/142	34/10955	0.0714918	0.135607	0.0710737	MOV10/AGO4	2
R-HSA-5617472	Activation of anterior HOX genes in hindbrain development during early embryogenesis	4/142	121/10955	0.0721974	0.136225	0.0713974	POLR2D/JUN/POLR2L/POLR2A	4
R-HSA-5619507	Activation of HOX genes during differentiation	4/142	121/10955	0.0721974	0.136225	0.0713974	POLR2D/JUN/POLR2L/POLR2A	4
R-HSA-936440	Negative regulators of DDX58/IFIH1 signaling	2/142	35/10955	0.0752	0.141518	0.0741716	ISG15/PIN1	2
R-HSA-2173796	SMAD2/SMAD3:SMAD4 heterotrimer regulates transcription	2/142	36/10955	0.0789683	0.147834	0.0774816	MYC/SERPINE1	2
R-HSA-5673000	RAF activation	2/142	36/10955	0.0789683	0.147834	0.0774816	PPP2R1B/PPP2CA	2
R-HSA-9029569	NR1H3 & NR1H2 regulate gene expression linked to cholesterol transport and efflux	2/142	37/10955	0.0827946	0.154593	0.0810243	MOV10/AGO4	2
R-HSA-438064	Post NMDA receptor activation events	3/142	80/10955	0.0853413	0.158934	0.0832997	PRKAB2/PRKAG1/PRKAG2	3
R-HSA-114608	Platelet degranulation	4/142	129/10955	0.0866308	0.159761	0.0837332	IGF1/SERPINE1/BRPF3/THBS1	4
R-HSA-111465	Apoptotic cleavage of cellular proteins	2/142	38/10955	0.0866767	0.159761	0.0837332	CASP8/APC	2
R-HSA-8939243	RUNX1 interacts with co-factors whose precise effect on RUNX1 targets is not known	2/142	38/10955	0.0866767	0.159761	0.0837332	CSNK2A2/HIPK2	2
R-HSA-9772572	Early SARS-CoV-2 Infection Events	2/142	38/10955	0.0866767	0.159761	0.0837332	RB1/DDX5	2
R-HSA-9679506	SARS-CoV Infections	9/142	414/10955	0.0892263	0.164039	0.0859752	GATAD2B/ISG15/HDAC2/RB1/CSNK1A1/RPS27L/PRMT1/HSP90AA1/DDX5	9
R-HSA-390471	Association of TriC/CCT with target proteins during biosynthesis	2/142	39/10955	0.0906127	0.166162	0.0870877	CCNE2/TP53	2
R-HSA-9694516	SARS-CoV-2 Infection	7/142	299/10955	0.0938891	0.171731	0.0900065	ISG15/RB1/CSNK1A1/RPS27L/PRMT1/HSP90AA1/DDX5	7
R-HSA-5696399	Global Genome Nucleotide Excision Repair (GG-NER)	3/142	84/10955	0.0954397	0.174123	0.0912602	GTF2H4/GTF2H5/GTF2H1	3
R-HSA-76005	Response to elevated platelet cytosolic Ca2+	4/142	134/10955	0.0963117	0.175268	0.0918602	IGF1/SERPINE1/BRPF3/THBS1	4
R-HSA-9772755	Formation of WDR5-containing histone-modifying complexes	2/142	42/10955	0.102723	0.186462	0.0977274	PHF20/KAT2B	2
R-HSA-73886	Chromosome Maintenance	4/142	140/10955	0.108569	0.196576	0.103028	POLR2D/DNA2/POLR2L/POLR2A	4
R-HSA-390466	Chaperonin-mediated protein folding	3/142	91/10955	0.114212	0.206272	0.10811	CSNK2A2/CCNE2/TP53	3
R-HSA-3899300	SUMOylation of transcription cofactors	2/142	45/10955	0.115248	0.207099	0.108543	HIPK2/DDX5	2
R-HSA-445989	TAK1-dependent IKK and NF-kappa-B activation	2/142	45/10955	0.115248	0.207099	0.108543	CASP8/TP53	2
R-HSA-442755	Activation of NMDA receptors and postsynaptic events	3/142	93/10955	0.119816	0.214234	0.112283	PRKAB2/PRKAG1/PRKAG2	3
R-HSA-70326	Glucose metabolism	3/142	93/10955	0.119816	0.214234	0.112283	GPI/PPP2R1B/PPP2CA	3
R-HSA-110056	MAPK3 (ERK1) activation	1/142	10/10955	0.122363	0.215036	0.112703	CDK1	1
R-HSA-2562578	TRIF-mediated programmed cell death	1/142	10/10955	0.122363	0.215036	0.112703	CASP8	1
R-HSA-381183	ATF6 (ATF6-alpha) activates chaperone genes	1/142	10/10955	0.122363	0.215036	0.112703	NFYC	1
R-HSA-450341	Activation of the AP-1 family of transcription factors	1/142	10/10955	0.122363	0.215036	0.112703	JUN	1
R-HSA-9617629	Regulation of FOXO transcriptional activity by acetylation	1/142	10/10955	0.122363	0.215036	0.112703	KAT2B	1
R-HSA-975578	Reactions specific to the complex N-glycan synthesis pathway	1/142	10/10955	0.122363	0.215036	0.112703	FUCA1	1
R-HSA-9757110	Prednisone ADME	1/142	10/10955	0.122363	0.215036	0.112703	ABCB1	1
R-HSA-6783783	Interleukin-10 signaling	2/142	47/10955	0.123803	0.216504	0.113473	ICAM1/LIF	2
R-HSA-9024446	NR1H2 and NR1H3-mediated signaling	2/142	47/10955	0.123803	0.216504	0.113473	MOV10/AGO4	2
R-HSA-1592230	Mitochondrial biogenesis	3/142	95/10955	0.125519	0.218853	0.114704	PRKAB2/PRKAG1/PRKAG2	3
R-HSA-68877	Mitotic Prometaphase	5/142	204/10955	0.125757	0.218853	0.114704	CDK1/CSNK2A2/PPP2R1B/PPP2CA/HSP90AA1	5
R-HSA-5357905	Regulation of TNFR1 signaling	2/142	48/10955	0.128137	0.222455	0.116592	USP2/CASP8	2
R-HSA-391251	Protein folding	3/142	97/10955	0.13132	0.227431	0.1192	CSNK2A2/CCNE2/TP53	3
R-HSA-8934903	Receptor Mediated Mitophagy	1/142	11/10955	0.13375	0.229973	0.120532	CSNK2A2	1
R-HSA-9634285	Constitutive Signaling by Overexpressed ERBB2	1/142	11/10955	0.13375	0.229973	0.120532	HSP90AA1	1
R-HSA-9708530	Regulation of BACH1 activity	1/142	11/10955	0.13375	0.229973	0.120532	SKP2	1
R-HSA-9679191	Potential therapeutics for SARS	3/142	99/10955	0.137213	0.235364	0.123357	GATAD2B/HDAC2/HSP90AA1	3
R-HSA-2173793	Transcriptional activity of SMAD2/SMAD3:SMAD4 heterotrimer	2/142	51/10955	0.141345	0.241872	0.126768	MYC/SERPINE1	2
R-HSA-1474151	Tetrahydrobiopterin (BH4) synthesis, recycling, salvage and regulation	1/142	12/10955	0.144989	0.244032	0.1279	HSP90AA1	1
R-HSA-264870	Caspase-mediated cleavage of cytoskeletal proteins	1/142	12/10955	0.144989	0.244032	0.1279	CASP8	1
R-HSA-3371511	HSF1 activation	1/142	12/10955	0.144989	0.244032	0.1279	HSP90AA1	1
R-HSA-381033	ATF6 (ATF6-alpha) activates chaperones	1/142	12/10955	0.144989	0.244032	0.1279	NFYC	1
R-HSA-5685939	HDR through MMEJ (alt-NHEJ)	1/142	12/10955	0.144989	0.244032	0.1279	RBBP8	1
R-HSA-9664420	Killing mechanisms	1/142	12/10955	0.144989	0.244032	0.1279	JUN	1
R-HSA-9673324	WNT5:FZD7-mediated leishmania damping	1/142	12/10955	0.144989	0.244032	0.1279	JUN	1
R-HSA-75153	Apoptotic execution phase	2/142	52/10955	0.145811	0.244839	0.128324	CASP8/APC	2
R-HSA-2219528	PI3K/AKT Signaling in Cancer	3/142	104/10955	0.15233	0.255188	0.133748	PRR5/CDKN1B/AKT1S1	3
R-HSA-5578749	Transcriptional regulation by small RNAs	3/142	105/10955	0.155415	0.259658	0.13609	POLR2D/POLR2L/POLR2A	3
R-HSA-203615	eNOS activation	1/142	13/10955	0.156084	0.259658	0.13609	HSP90AA1	1
R-HSA-75205	Dissolution of Fibrin Clot	1/142	13/10955	0.156084	0.259658	0.13609	SERPINE1	1
R-HSA-6811558	PI5P, PP2A and IER3 Regulate PI3K/AKT Signaling	3/142	106/10955	0.15852	0.263099	0.137894	PIP4K2C/PPP2R1B/PPP2CA	3
R-HSA-3371497	HSP90 chaperone cycle for steroid hormone receptors (SHR) in the presence of ligand	2/142	55/10955	0.159377	0.263911	0.13832	HSPA1A/HSP90AA1	2
R-HSA-162658	Golgi Cisternae Pericentriolar Stack Reorganization	1/142	14/10955	0.167036	0.27469	0.143969	CDK1	1
R-HSA-69166	Removal of the Flap Intermediate	1/142	14/10955	0.167036	0.27469	0.143969	DNA2	1
R-HSA-8941856	RUNX3 regulates NOTCH signaling	1/142	14/10955	0.167036	0.27469	0.143969	KAT2B	1
R-HSA-168643	Nucleotide-binding domain, leucine rich repeat containing receptor (NLR) signaling pathways	2/142	57/10955	0.168548	0.275282	0.144279	CASP8/BCL2	2
R-HSA-75893	TNF signaling	2/142	57/10955	0.168548	0.275282	0.144279	USP2/CASP8	2
R-HSA-9694635	Translation of Structural Proteins	2/142	57/10955	0.168548	0.275282	0.144279	CSNK1A1/PRMT1	2
R-HSA-6798695	Neutrophil degranulation	9/142	481/10955	0.172156	0.280536	0.147033	GPI/LAMTOR2/HSPA1A/FUCA1/PSMC3/PSMD7/PSMD11/PSMC2/HSP90AA1	9
R-HSA-3772470	Negative regulation of TCF-dependent signaling by WNT ligand antagonists	1/142	15/10955	0.177847	0.286554	0.150187	DKK1	1
R-HSA-4419969	Depolymerization of the Nuclear Lamina	1/142	15/10955	0.177847	0.286554	0.150187	CDK1	1
R-HSA-5637810	Constitutive Signaling by EGFRvIII	1/142	15/10955	0.177847	0.286554	0.150187	HSP90AA1	1
R-HSA-5637812	Signaling by EGFRvIII in Cancer	1/142	15/10955	0.177847	0.286554	0.150187	HSP90AA1	1
R-HSA-69183	Processive synthesis on the lagging strand	1/142	15/10955	0.177847	0.286554	0.150187	DNA2	1
R-HSA-199418	Negative regulation of the PI3K/AKT network	3/142	113/10955	0.180766	0.290603	0.152309	PIP4K2C/PPP2R1B/PPP2CA	3
R-HSA-198725	Nuclear Events (kinase and transcription factor activation)	2/142	61/10955	0.187142	0.298384	0.156387	PPP2R1B/PPP2CA	2
R-HSA-1295596	Spry regulation of FGF signaling	1/142	16/10955	0.188519	0.298384	0.156387	PPP2CA	1
R-HSA-1362300	Transcription of E2F targets under negative control by p107 (RBL1) and p130 (RBL2) in complex with HDAC1	1/142	16/10955	0.188519	0.298384	0.156387	CDK1	1
R-HSA-210744	Regulation of gene expression in late stage (branching morphogenesis) pancreatic bud precursor cells	1/142	16/10955	0.188519	0.298384	0.156387	KAT2B	1
R-HSA-399954	Sema3A PAK dependent Axon repulsion	1/142	16/10955	0.188519	0.298384	0.156387	HSP90AA1	1
R-HSA-418038	Nucleotide-like (purinergic) receptors	1/142	16/10955	0.188519	0.298384	0.156387	ADORA2B	1
R-HSA-9665348	Signaling by ERBB2 ECD mutants	1/142	16/10955	0.188519	0.298384	0.156387	HSP90AA1	1
R-HSA-927802	Nonsense-Mediated Decay (NMD)	3/142	116/10955	0.190549	0.300272	0.157377	RPL23/RPS27L/PPP2CA	3
R-HSA-975957	Nonsense Mediated Decay (NMD) enhanced by the Exon Junction Complex (EJC)	3/142	116/10955	0.190549	0.300272	0.157377	RPL23/RPS27L/PPP2CA	3
R-HSA-4086398	Ca2+ pathway	2/142	62/10955	0.191836	0.301637	0.158092	MOV10/AGO4	2
R-HSA-174437	Removal of the Flap Intermediate from the C-strand	1/142	17/10955	0.199052	0.309589	0.16226	DNA2	1
R-HSA-202131	Metabolism of nitric oxide: NOS3 activation and regulation	1/142	17/10955	0.199052	0.309589	0.16226	HSP90AA1	1
R-HSA-6788467	IL-6-type cytokine receptor ligand interactions	1/142	17/10955	0.199052	0.309589	0.16226	LIF	1
R-HSA-9022699	MECP2 regulates neuronal receptors and channels	1/142	17/10955	0.199052	0.309589	0.16226	HDAC2	1
R-HSA-9034015	Signaling by NTRK3 (TRKC)	1/142	17/10955	0.199052	0.309589	0.16226	BAX	1
R-HSA-9707564	Cytoprotection by HMOX1	2/142	64/10955	0.201269	0.31236	0.163712	COX7A2L/COX6B1	2
R-HSA-8873719	RAB geranylgeranylation	2/142	65/10955	0.206007	0.319021	0.167203	CHM/RABGGTB	2
R-HSA-5635838	Activation of SMO	1/142	18/10955	0.209451	0.322959	0.169267	CSNK1A1	1
R-HSA-73780	RNA Polymerase III Chain Elongation	1/142	18/10955	0.209451	0.322959	0.169267	POLR2L	1
R-HSA-3108232	SUMO E3 ligases SUMOylate target proteins	4/142	182/10955	0.210756	0.324275	0.169957	HDAC2/HIPK2/TP53/DDX5	4
R-HSA-1236382	Constitutive Signaling by Ligand-Responsive EGFR Cancer Variants	1/142	19/10955	0.219715	0.33447	0.1753	HSP90AA1	1
R-HSA-1362277	Transcription of E2F targets under negative control by DREAM complex	1/142	19/10955	0.219715	0.33447	0.1753	MYC	1
R-HSA-174414	Processive synthesis on the C-strand of the telomere	1/142	19/10955	0.219715	0.33447	0.1753	DNA2	1
R-HSA-422085	Synthesis, secretion, and deacylation of Ghrelin	1/142	19/10955	0.219715	0.33447	0.1753	IGF1	1
R-HSA-5637815	Signaling by Ligand-Responsive EGFR Variants in Cancer	1/142	19/10955	0.219715	0.33447	0.1753	HSP90AA1	1
R-HSA-381426	Regulation of Insulin-like Growth Factor (IGF) transport and uptake by Insulin-like Growth Factor Binding Proteins (IGFBPs)	3/142	125/10955	0.220649	0.33518	0.175673	SHISA5/IGF1/MMP2	3
R-HSA-2500257	Resolution of Sister Chromatid Cohesion	3/142	126/10955	0.224053	0.339632	0.178006	CDK1/PPP2R1B/PPP2CA	3
R-HSA-2990846	SUMOylation	4/142	188/10955	0.227173	0.341211	0.178833	HDAC2/HIPK2/TP53/DDX5	4
R-HSA-111471	Apoptotic factor-mediated response	1/142	20/10955	0.229846	0.341211	0.178833	BAX	1
R-HSA-176412	Phosphorylation of the APC/C	1/142	20/10955	0.229846	0.341211	0.178833	CDK1	1
R-HSA-3232118	SUMOylation of transcription factors	1/142	20/10955	0.229846	0.341211	0.178833	TP53	1
R-HSA-5625900	RHO GTPases activate CIT	1/142	20/10955	0.229846	0.341211	0.178833	CDKN1B	1
R-HSA-69186	Lagging Strand Synthesis	1/142	20/10955	0.229846	0.341211	0.178833	DNA2	1
R-HSA-9013695	NOTCH4 Intracellular Domain Regulates Transcription	1/142	20/10955	0.229846	0.341211	0.178833	KAT2B	1
R-HSA-380259	Loss of Nlp from mitotic centrosomes	2/142	70/10955	0.229853	0.341211	0.178833	CDK1/HSP90AA1	2
R-HSA-380284	Loss of proteins required for interphase microtubule organization from the centrosome	2/142	70/10955	0.229853	0.341211	0.178833	CDK1/HSP90AA1	2
R-HSA-9772573	Late SARS-CoV-2 Infection Events	2/142	70/10955	0.229853	0.341211	0.178833	CSNK1A1/PRMT1	2
R-HSA-1169408	ISG15 antiviral mechanism	2/142	72/10955	0.239448	0.352399	0.184697	ISG15/PIN1	2
R-HSA-909733	Interferon alpha/beta signaling	2/142	72/10955	0.239448	0.352399	0.184697	PSMB8/ISG15	2
R-HSA-445144	Signal transduction by L1	1/142	21/10955	0.239847	0.352399	0.184697	CSNK2A2	1
R-HSA-622312	Inflammasomes	1/142	21/10955	0.239847	0.352399	0.184697	BCL2	1
R-HSA-8978934	Metabolism of cofactors	1/142	21/10955	0.239847	0.352399	0.184697	HSP90AA1	1
R-HSA-8854518	AURKA Activation by TPX2	2/142	73/10955	0.244253	0.357407	0.187322	CDK1/HSP90AA1	2
R-HSA-9824439	Bacterial Infection Pathways	2/142	73/10955	0.244253	0.357407	0.187322	TXNRD1/HSP90AA1	2
R-HSA-389357	CD28 dependent PI3K/Akt signaling	1/142	22/10955	0.24972	0.363182	0.190349	PRR5	1
R-HSA-9613829	Chaperone Mediated Autophagy	1/142	22/10955	0.24972	0.363182	0.190349	HSP90AA1	1
R-HSA-9665686	Signaling by ERBB2 TMD/JMD mutants	1/142	22/10955	0.24972	0.363182	0.190349	HSP90AA1	1
R-HSA-166520	Signaling by NTRKs	3/142	134/10955	0.251634	0.365226	0.19142	BAX/PPP2R1B/PPP2CA	3
R-HSA-2995410	Nuclear Envelope (NE) Reassembly	2/142	75/10955	0.253874	0.366992	0.192345	CDK1/PPP2CA	2
R-HSA-427389	ERCC6 (CSB) and EHMT2 (G9a) positively regulate rRNA expression	2/142	75/10955	0.253874	0.366992	0.192345	GATAD2B/HDAC2	2
R-HSA-73980	RNA Polymerase III Transcription Termination	1/142	23/10955	0.259464	0.372817	0.195399	POLR2L	1
R-HSA-9013418	RHOBTB2 GTPase cycle	1/142	23/10955	0.259464	0.372817	0.195399	HSP90AA1	1
R-HSA-9793380	Formation of paraxial mesoderm	1/142	23/10955	0.259464	0.372817	0.195399	KAT2B	1
R-HSA-913531	Interferon Signaling	4/142	200/10955	0.260911	0.374146	0.196095	PSMB8/ICAM1/ISG15/PIN1	4
R-HSA-5693565	Recruitment and ATM-mediated phosphorylation of repair and signaling proteins at DNA double strand breaks	2/142	77/10955	0.263505	0.377112	0.19765	CHEK2/TP53	2
R-HSA-3214858	RMTs methylate histone arginines	2/142	78/10955	0.268322	0.379789	0.199053	PRMT5/PRMT1	2
R-HSA-5693606	DNA Double Strand Break Response	2/142	78/10955	0.268322	0.379789	0.199053	CHEK2/TP53	2
R-HSA-174048	APC/C:Cdc20 mediated degradation of Cyclin B	1/142	24/10955	0.269083	0.379789	0.199053	CDK1	1
R-HSA-429947	Deadenylation of mRNA	1/142	24/10955	0.269083	0.379789	0.199053	CNOT7	1
R-HSA-5668599	RHO GTPases Activate NADPH Oxidases	1/142	24/10955	0.269083	0.379789	0.199053	PIN1	1
R-HSA-6783589	Interleukin-6 family signaling	1/142	24/10955	0.269083	0.379789	0.199053	LIF	1
R-HSA-8940973	RUNX2 regulates osteoblast differentiation	1/142	24/10955	0.269083	0.379789	0.199053	RB1	1
R-HSA-1169410	Antiviral mechanism by IFN-stimulated genes	2/142	80/10955	0.277953	0.389358	0.204068	ISG15/PIN1	2
R-HSA-1643713	Signaling by EGFR in Cancer	1/142	25/10955	0.278578	0.389358	0.204068	HSP90AA1	1
R-HSA-210991	Basigin interactions	1/142	25/10955	0.278578	0.389358	0.204068	SLC7A11	1
R-HSA-9013508	NOTCH3 Intracellular Domain Regulates Transcription	1/142	25/10955	0.278578	0.389358	0.204068	KAT2B	1
R-HSA-9664565	Signaling by ERBB2 KD Mutants	1/142	25/10955	0.278578	0.389358	0.204068	HSP90AA1	1
R-HSA-9678108	SARS-CoV-1 Infection	3/142	142/10955	0.279686	0.390145	0.20448	RB1/RPS27L/DDX5	3
R-HSA-72163	mRNA Splicing - Major Pathway	4/142	207/10955	0.281032	0.391262	0.205066	POLR2D/POLR2L/POLR2A/DDX5	4
R-HSA-380270	Recruitment of mitotic centrosome proteins and complexes	2/142	82/10955	0.287578	0.397805	0.208495	CDK1/HSP90AA1	2
R-HSA-380287	Centrosome maturation	2/142	82/10955	0.287578	0.397805	0.208495	CDK1/HSP90AA1	2
R-HSA-1227990	Signaling by ERBB2 in Cancer	1/142	26/10955	0.287951	0.397805	0.208495	HSP90AA1	1
R-HSA-975576	N-glycan antennae elongation in the medial/trans-Golgi	1/142	26/10955	0.287951	0.397805	0.208495	FUCA1	1
R-HSA-1368108	BMAL1:CLOCK,NPAS2 activates circadian gene expression	1/142	27/10955	0.297203	0.407446	0.213548	SERPINE1	1
R-HSA-3000170	Syndecan interactions	1/142	27/10955	0.297203	0.407446	0.213548	THBS1	1
R-HSA-380994	ATF4 activates genes in response to endoplasmic reticulum stress	1/142	27/10955	0.297203	0.407446	0.213548	NFYC	1
R-HSA-76066	RNA Polymerase III Transcription Initiation From Type 2 Promoter	1/142	27/10955	0.297203	0.407446	0.213548	POLR2L	1
R-HSA-216083	Integrin cell surface interactions	2/142	85/10955	0.301988	0.412429	0.21616	ICAM1/THBS1	2
R-HSA-912446	Meiotic recombination	2/142	85/10955	0.301988	0.412429	0.21616	RBBP8/MLH1	2
R-HSA-72172	mRNA Splicing	4/142	215/10955	0.304315	0.413639	0.216794	POLR2D/POLR2L/POLR2A/DDX5	4
R-HSA-1483191	Synthesis of PC	1/142	28/10955	0.306335	0.413639	0.216794	CSNK2A2	1
R-HSA-69205	G1/S-Specific Transcription	1/142	28/10955	0.306335	0.413639	0.216794	CDK1	1
R-HSA-76061	RNA Polymerase III Transcription Initiation From Type 1 Promoter	1/142	28/10955	0.306335	0.413639	0.216794	POLR2L	1
R-HSA-76071	RNA Polymerase III Transcription Initiation From Type 3 Promoter	1/142	28/10955	0.306335	0.413639	0.216794	POLR2L	1
R-HSA-9619665	EGR2 and SOX10-mediated initiation of Schwann cell myelination	1/142	28/10955	0.306335	0.413639	0.216794	HDAC2	1
R-HSA-5205647	Mitophagy	1/142	29/10955	0.315349	0.421603	0.220968	CSNK2A2	1
R-HSA-5654732	Negative regulation of FGFR3 signaling	1/142	29/10955	0.315349	0.421603	0.220968	PPP2CA	1
R-HSA-5683826	Surfactant metabolism	1/142	29/10955	0.315349	0.421603	0.220968	ADORA2B	1
R-HSA-8863795	Downregulation of ERBB2 signaling	1/142	29/10955	0.315349	0.421603	0.220968	HSP90AA1	1
R-HSA-9615017	FOXO-mediated transcription of oxidative stress, metabolic and neuronal genes	1/142	29/10955	0.315349	0.421603	0.220968	HDAC2	1
R-HSA-2565942	Regulation of PLK1 Activity at G2/M Transition	2/142	88/10955	0.316349	0.421603	0.220968	CDK1/HSP90AA1	2
R-HSA-418346	Platelet homeostasis	2/142	88/10955	0.316349	0.421603	0.220968	PPP2R1B/PPP2CA	2
R-HSA-8866652	Synthesis of active ubiquitin: roles of E1 and E2 enzymes	1/142	30/10955	0.324247	0.430316	0.225534	USP7	1
R-HSA-156902	Peptide chain elongation	2/142	90/10955	0.325888	0.430316	0.225534	RPL23/RPS27L	2
R-HSA-192823	Viral mRNA Translation	2/142	90/10955	0.325888	0.430316	0.225534	RPL23/RPS27L	2
R-HSA-201722	Formation of the beta-catenin:TCF transactivating complex	2/142	90/10955	0.325888	0.430316	0.225534	MYC/TRRAP	2
R-HSA-5250924	B-WICH complex positively regulates rRNA expression	2/142	90/10955	0.325888	0.430316	0.225534	POLR2L/KAT2B	2
R-HSA-5654733	Negative regulation of FGFR4 signaling	1/142	31/10955	0.333031	0.438939	0.230054	PPP2CA	1
R-HSA-111885	Opioid Signalling	2/142	92/10955	0.335392	0.44124	0.23126	PPP2R1B/PPP2CA	2
R-HSA-1852241	Organelle biogenesis and maintenance	5/142	296/10955	0.338613	0.443839	0.232622	PRKAB2/PRKAG1/CDK1/PRKAG2/HSP90AA1	5
R-HSA-170834	Signaling by TGF-beta Receptor Complex	2/142	93/10955	0.34013	0.443839	0.232622	MYC/SERPINE1	2
R-HSA-2871796	FCERI mediated MAPK activation	1/142	32/10955	0.3417	0.443839	0.232622	JUN	1
R-HSA-381042	PERK regulates gene expression	1/142	32/10955	0.3417	0.443839	0.232622	NFYC	1
R-HSA-5656169	Termination of translesion DNA synthesis	1/142	32/10955	0.3417	0.443839	0.232622	ISG15	1
R-HSA-69190	DNA strand elongation	1/142	32/10955	0.3417	0.443839	0.232622	DNA2	1
R-HSA-8941326	RUNX2 regulates bone development	1/142	32/10955	0.3417	0.443839	0.232622	RB1	1
R-HSA-156842	Eukaryotic Translation Elongation	2/142	94/10955	0.344858	0.443919	0.232664	RPL23/RPS27L	2
R-HSA-2408557	Selenocysteine synthesis	2/142	94/10955	0.344858	0.443919	0.232664	RPL23/RPS27L	2
R-HSA-3214815	HDACs deacetylate histones	2/142	94/10955	0.344858	0.443919	0.232664	GATAD2B/HDAC2	2
R-HSA-380320	Recruitment of NuMA to mitotic centrosomes	2/142	94/10955	0.344858	0.443919	0.232664	CDK1/HSP90AA1	2
R-HSA-72764	Eukaryotic Translation Termination	2/142	94/10955	0.344858	0.443919	0.232664	RPL23/RPS27L	2
R-HSA-1592389	Activation of Matrix Metalloproteinases	1/142	33/10955	0.350258	0.446066	0.233789	MMP2	1
R-HSA-168274	Export of Viral Ribonucleoproteins from Nucleus	1/142	33/10955	0.350258	0.446066	0.233789	HSPA1A	1
R-HSA-352230	Amino acid transport across the plasma membrane	1/142	33/10955	0.350258	0.446066	0.233789	SLC7A11	1
R-HSA-389356	CD28 co-stimulation	1/142	33/10955	0.350258	0.446066	0.233789	PRR5	1
R-HSA-5357956	TNFR1-induced NF-kappa-B signaling pathway	1/142	33/10955	0.350258	0.446066	0.233789	USP2	1
R-HSA-5654726	Negative regulation of FGFR1 signaling	1/142	33/10955	0.350258	0.446066	0.233789	PPP2CA	1
R-HSA-141424	Amplification of signal from the kinetochores	2/142	96/10955	0.35428	0.448797	0.23522	PPP2R1B/PPP2CA	2
R-HSA-141444	Amplification of signal from unattached kinetochores via a MAD2 inhibitory signal	2/142	96/10955	0.35428	0.448797	0.23522	PPP2R1B/PPP2CA	2
R-HSA-975956	Nonsense Mediated Decay (NMD) independent of the Exon Junction Complex (EJC)	2/142	96/10955	0.35428	0.448797	0.23522	RPL23/RPS27L	2
R-HSA-174417	Telomere C-strand (Lagging Strand) Synthesis	1/142	34/10955	0.358706	0.452803	0.23732	DNA2	1
R-HSA-5654727	Negative regulation of FGFR2 signaling	1/142	34/10955	0.358706	0.452803	0.23732	PPP2CA	1
R-HSA-5620912	Anchoring of the basal body to the plasma membrane	2/142	98/10955	0.363656	0.458245	0.240172	CDK1/HSP90AA1	2
R-HSA-3301854	Nuclear Pore Complex (NPC) Disassembly	1/142	35/10955	0.367044	0.459285	0.240717	CDK1	1
R-HSA-70263	Gluconeogenesis	1/142	35/10955	0.367044	0.459285	0.240717	GPI	1
R-HSA-8953750	Transcriptional Regulation by E2F6	1/142	35/10955	0.367044	0.459285	0.240717	RBBP8	1
R-HSA-9706574	RHOBTB GTPase Cycle	1/142	35/10955	0.367044	0.459285	0.240717	HSP90AA1	1
R-HSA-15869	Metabolism of nucleotides	2/142	99/10955	0.368325	0.459285	0.240717	GSR/TXNRD1	2
R-HSA-4420097	VEGFA-VEGFR2 Pathway	2/142	99/10955	0.368325	0.459285	0.240717	PRR5/HSP90AA1	2
R-HSA-76046	RNA Polymerase III Transcription Initiation	1/142	36/10955	0.375275	0.467139	0.244834	POLR2L	1
R-HSA-72689	Formation of a pool of free 40S subunits	2/142	102/10955	0.382251	0.471522	0.247131	RPL23/RPS27L	2
R-HSA-9633012	Response of EIF2AK4 (GCN2) to amino acid deficiency	2/142	102/10955	0.382251	0.471522	0.247131	RPL23/RPS27L	2
R-HSA-168638	NOD1/2 Signaling Pathway	1/142	37/10955	0.383399	0.471522	0.247131	CASP8	1
R-HSA-5083635	Defective B3GALTL causes PpS	1/142	37/10955	0.383399	0.471522	0.247131	THBS1	1
R-HSA-5689901	Metalloprotease DUBs	1/142	37/10955	0.383399	0.471522	0.247131	KAT2B	1
R-HSA-77289	Mitochondrial Fatty Acid Beta-Oxidation	1/142	37/10955	0.383399	0.471522	0.247131	ACAD11	1
R-HSA-9735869	SARS-CoV-1 modulates host translation machinery	1/142	37/10955	0.383399	0.471522	0.247131	RPS27L	1
R-HSA-611105	Respiratory electron transport	2/142	103/10955	0.386864	0.474969	0.248937	COX7A2L/COX6B1	2
R-HSA-5173214	O-glycosylation of TSR domain-containing proteins	1/142	38/10955	0.391419	0.477292	0.250155	THBS1	1
R-HSA-6814122	Cooperation of PDCL (PhLP1) and TRiC/CCT in G-protein beta folding	1/142	38/10955	0.391419	0.477292	0.250155	CSNK2A2	1
R-HSA-8864260	Transcriptional regulation by the AP-2 (TFAP2) family of transcription factors	1/142	38/10955	0.391419	0.477292	0.250155	MYC	1
R-HSA-9607240	FLT3 Signaling	1/142	38/10955	0.391419	0.477292	0.250155	CDKN1B	1
R-HSA-110313	Translesion synthesis by Y family DNA polymerases bypasses lesions on DNA template	1/142	39/10955	0.399335	0.486117	0.254781	ISG15	1
R-HSA-8978868	Fatty acid metabolism	3/142	177/10955	0.403565	0.490434	0.257043	PRKAB2/ACAD11/PRKAG2	3
R-HSA-168276	NS1 Mediated Effects on Host Pathways	1/142	40/10955	0.407149	0.492286	0.258014	ISG15	1
R-HSA-5654741	Signaling by FGFR3	1/142	40/10955	0.407149	0.492286	0.258014	PPP2CA	1
R-HSA-5674135	MAP2K and MAPK activation	1/142	40/10955	0.407149	0.492286	0.258014	LAMTOR2	1
R-HSA-194138	Signaling by VEGF	2/142	108/10955	0.409701	0.494539	0.259194	PRR5/HSP90AA1	2
R-HSA-186712	Regulation of beta-cell development	1/142	41/10955	0.414861	0.497418	0.260703	KAT2B	1
R-HSA-5654743	Signaling by FGFR4	1/142	41/10955	0.414861	0.497418	0.260703	PPP2CA	1
R-HSA-74158	RNA Polymerase III Transcription	1/142	41/10955	0.414861	0.497418	0.260703	POLR2L	1
R-HSA-749476	RNA Polymerase III Abortive And Retractive Initiation	1/142	41/10955	0.414861	0.497418	0.260703	POLR2L	1
R-HSA-2173782	Binding and Uptake of Ligands by Scavenger Receptors	1/142	42/10955	0.422475	0.504017	0.264162	HSP90AA1	1
R-HSA-2426168	Activation of gene expression by SREBF (SREBP)	1/142	42/10955	0.422475	0.504017	0.264162	NFYC	1
R-HSA-3769402	Deactivation of the beta-catenin transactivating complex	1/142	42/10955	0.422475	0.504017	0.264162	APC	1
R-HSA-2559582	Senescence-Associated Secretory Phenotype (SASP)	2/142	111/10955	0.423206	0.504051	0.26418	CDKN1B/JUN	2
R-HSA-156827	L13a-mediated translational silencing of Ceruloplasmin expression	2/142	112/10955	0.427673	0.508527	0.266526	RPL23/RPS27L	2
R-HSA-9646399	Aggrephagy	1/142	43/10955	0.429989	0.509591	0.267083	HSP90AA1	1
R-HSA-9660821	ADORA2B mediated anti-inflammatory cytokines production	1/142	43/10955	0.429989	0.509591	0.267083	ADORA2B	1
R-HSA-1799339	SRP-dependent cotranslational protein targeting to membrane	2/142	113/10955	0.432122	0.509591	0.267084	RPL23/RPS27L	2
R-HSA-69618	Mitotic Spindle Checkpoint	2/142	113/10955	0.432122	0.509591	0.267084	PPP2R1B/PPP2CA	2
R-HSA-72706	GTP hydrolysis and joining of the 60S ribosomal subunit	2/142	113/10955	0.432122	0.509591	0.267084	RPL23/RPS27L	2
R-HSA-187037	Signaling by NTRK1 (TRKA)	2/142	115/10955	0.440964	0.519165	0.272101	PPP2R1B/PPP2CA	2
R-HSA-76002	Platelet activation, signaling and aggregation	4/142	263/10955	0.445254	0.523356	0.274298	IGF1/SERPINE1/BRPF3/THBS1	4
R-HSA-1500620	Meiosis	2/142	117/10955	0.449732	0.526032	0.275701	RBBP8/MLH1	2
R-HSA-1989781	PPARA activates gene expression	2/142	117/10955	0.449732	0.526032	0.275701	TXNRD1/NFYC	2
R-HSA-9648025	EML4 and NUDC in mitotic spindle formation	2/142	117/10955	0.449732	0.526032	0.275701	PPP2R1B/PPP2CA	2
R-HSA-8854214	TBC/RABGAPs	1/142	46/10955	0.451956	0.527773	0.276613	TSC1	1
R-HSA-400206	Regulation of lipid metabolism by PPARalpha	2/142	119/10955	0.458422	0.534453	0.280114	TXNRD1/NFYC	2
R-HSA-72613	Eukaryotic Translation Initiation	2/142	120/10955	0.462738	0.537736	0.281835	RPL23/RPS27L	2
R-HSA-72737	Cap-dependent Translation Initiation	2/142	120/10955	0.462738	0.537736	0.281835	RPL23/RPS27L	2
R-HSA-73893	DNA Damage Bypass	1/142	48/10955	0.466131	0.540803	0.283442	ISG15	1
R-HSA-9006936	Signaling by TGFB family members	2/142	122/10955	0.471309	0.545927	0.286128	MYC/SERPINE1	2
R-HSA-9012852	Signaling by NOTCH3	1/142	49/10955	0.473082	0.547096	0.286741	KAT2B	1
R-HSA-9007101	Rab regulation of trafficking	2/142	124/10955	0.479799	0.552358	0.289498	CHM/TSC1	2
R-HSA-1227986	Signaling by ERBB2	1/142	50/10955	0.479942	0.552358	0.289498	HSP90AA1	1
R-HSA-5654736	Signaling by FGFR1	1/142	50/10955	0.479942	0.552358	0.289498	PPP2CA	1
R-HSA-180786	Extension of Telomeres	1/142	51/10955	0.486714	0.557467	0.292176	DNA2	1
R-HSA-3928665	EPH-ephrin mediated repulsion of cells	1/142	51/10955	0.486714	0.557467	0.292176	MMP2	1
R-HSA-9754678	SARS-CoV-2 modulates host translation machinery	1/142	51/10955	0.486714	0.557467	0.292176	RPS27L	1
R-HSA-9705671	SARS-CoV-2 activates/modulates innate and adaptive immune responses	2/142	126/10955	0.488205	0.558283	0.292604	ISG15/HSP90AA1	2
R-HSA-9705683	SARS-CoV-2-host interactions	3/142	203/10955	0.491879	0.558874	0.292913	ISG15/RPS27L/HSP90AA1	3
R-HSA-163200	Respiratory electron transport, ATP synthesis by chemiosmotic coupling, and heat production by uncoupling proteins.	2/142	127/10955	0.492377	0.558874	0.292913	COX7A2L/COX6B1	2
R-HSA-2428928	IRS-related events triggered by IGF1R	1/142	52/10955	0.493399	0.558874	0.292913	IGF1	1
R-HSA-2980766	Nuclear Envelope Breakdown	1/142	52/10955	0.493399	0.558874	0.292913	CDK1	1
R-HSA-72695	Formation of the ternary complex, and subsequently, the 43S complex	1/142	52/10955	0.493399	0.558874	0.292913	RPS27L	1
R-HSA-9758941	Gastrulation	1/142	52/10955	0.493399	0.558874	0.292913	KAT2B	1
R-HSA-112314	Neurotransmitter receptors and postsynaptic signal transmission	3/142	205/10955	0.498421	0.561909	0.294504	PRKAB2/PRKAG1/PRKAG2	3
R-HSA-1660499	Synthesis of PIPs at the plasma membrane	1/142	53/10955	0.499997	0.561909	0.294504	PIP4K2C	1
R-HSA-191859	snRNP Assembly	1/142	53/10955	0.499997	0.561909	0.294504	PRMT5	1
R-HSA-194441	Metabolism of non-coding RNA	1/142	53/10955	0.499997	0.561909	0.294504	PRMT5	1
R-HSA-2428924	IGF1R signaling cascade	1/142	53/10955	0.499997	0.561909	0.294504	IGF1	1
R-HSA-2404192	Signaling by Type 1 Insulin-like Growth Factor 1 Receptor (IGF1R)	1/142	54/10955	0.506509	0.566564	0.296944	IGF1	1
R-HSA-8848021	Signaling by PTK6	1/142	54/10955	0.506509	0.566564	0.296944	CDKN1B	1
R-HSA-9006927	Signaling by Non-Receptor Tyrosine Kinases	1/142	54/10955	0.506509	0.566564	0.296944	CDKN1B	1
R-HSA-72203	Processing of Capped Intron-Containing Pre-mRNA	4/142	285/10955	0.507472	0.566756	0.297045	POLR2D/POLR2L/POLR2A/DDX5	4
R-HSA-5576891	Cardiac conduction	2/142	132/10955	0.512914	0.570196	0.298847	HIPK2/KAT2B	2
R-HSA-1655829	Regulation of cholesterol biosynthesis by SREBP (SREBF)	1/142	55/10955	0.512938	0.570196	0.298847	NFYC	1
R-HSA-429914	Deadenylation-dependent mRNA decay	1/142	55/10955	0.512938	0.570196	0.298847	CNOT7	1
R-HSA-186797	Signaling by PDGF	1/142	58/10955	0.531728	0.590169	0.309316	THBS1	1
R-HSA-202733	Cell surface interactions at the vascular wall	2/142	137/10955	0.532903	0.590559	0.30952	SLC7A11/TNFRSF10B	2
R-HSA-3000171	Non-integrin membrane-ECM interactions	1/142	59/10955	0.53783	0.592357	0.310462	THBS1	1
R-HSA-380108	Chemokine receptors bind chemokines	1/142	59/10955	0.53783	0.592357	0.310462	CX3CL1	1
R-HSA-72649	Translation initiation complex formation	1/142	59/10955	0.53783	0.592357	0.310462	RPS27L	1
R-HSA-72702	Ribosomal scanning and start codon recognition	1/142	59/10955	0.53783	0.592357	0.310462	RPS27L	1
R-HSA-72662	Activation of the mRNA upon binding of the cap-binding complex and eIFs, and subsequent binding to 43S	1/142	60/10955	0.543853	0.598006	0.313423	RPS27L	1
R-HSA-5663220	RHO GTPases Activate Formins	2/142	140/10955	0.544628	0.598006	0.313423	PPP2R1B/PPP2CA	2
R-HSA-1474244	Extracellular matrix organization	4/142	300/10955	0.548098	0.600896	0.314938	ICAM1/MMP2/SERPINE1/THBS1	4
R-HSA-2029482	Regulation of actin dynamics for phagocytic cup formation	1/142	61/10955	0.549799	0.601841	0.315433	HSP90AA1	1
R-HSA-1474165	Reproduction	2/142	142/10955	0.552331	0.603691	0.316403	RBBP8/MLH1	2
R-HSA-1442490	Collagen degradation	1/142	64/10955	0.567176	0.618033	0.323919	MMP2	1
R-HSA-1834949	Cytosolic sensors of pathogen-associated DNA	1/142	64/10955	0.567176	0.618033	0.323919	POLR2L	1
R-HSA-373755	Semaphorin interactions	1/142	65/10955	0.57282	0.623235	0.326646	HSP90AA1	1
R-HSA-3906995	Diseases associated with O-glycosylation of proteins	1/142	68/10955	0.589315	0.64021	0.335543	THBS1	1
R-HSA-3371453	Regulation of HSF1-mediated heat shock response	1/142	69/10955	0.594671	0.645052	0.338081	HSPA1A	1
R-HSA-418594	G alpha (i) signalling events	4/142	319/10955	0.596981	0.646579	0.338881	BDKRB2/PPP2R1B/PPP2CA/CX3CL1	4
R-HSA-3214841	PKMTs methylate histone lysines	1/142	70/10955	0.599959	0.647847	0.339545	KMT5A	1
R-HSA-400253	Circadian Clock	1/142	70/10955	0.599959	0.647847	0.339545	SERPINE1	1
R-HSA-4551638	SUMOylation of chromatin organization proteins	1/142	71/10955	0.605177	0.6525	0.341984	HDAC2	1
R-HSA-195258	RHO GTPase Effectors	4/142	326/10955	0.614191	0.661223	0.346556	PIN1/CDKN1B/PPP2R1B/PPP2CA	4
R-HSA-3000178	ECM proteoglycans	1/142	76/10955	0.630274	0.676248	0.354431	SERPINE1	1
R-HSA-9658195	Leishmania infection	2/142	164/10955	0.630976	0.676248	0.354431	ADORA2B/JUN	2
R-HSA-9824443	Parasitic Infection Pathways	2/142	164/10955	0.630976	0.676248	0.354431	ADORA2B/JUN	2
R-HSA-983231	Factors involved in megakaryocyte development and platelet production	2/142	168/10955	0.644073	0.686706	0.359912	HDAC2/TP53	2
R-HSA-8852135	Protein ubiquitination	1/142	79/10955	0.644565	0.686706	0.359912	USP7	1
R-HSA-9662851	Anti-inflammatory response favouring Leishmania parasite infection	1/142	79/10955	0.644565	0.686706	0.359912	ADORA2B	1
R-HSA-9664433	Leishmania parasite growth and survival	1/142	79/10955	0.644565	0.686706	0.359912	ADORA2B	1
R-HSA-1483255	PI Metabolism	1/142	84/10955	0.667174	0.709739	0.371984	PIP4K2C	1
R-HSA-1428517	The citric acid (TCA) cycle and respiratory electron transport	2/142	178/10955	0.67522	0.716802	0.375685	COX7A2L/COX6B1	2
R-HSA-2029480	Fcgamma receptor (FCGR) dependent phagocytosis	1/142	86/10955	0.675813	0.716802	0.375685	HSP90AA1	1
R-HSA-112315	Transmission across Chemical Synapses	3/142	270/10955	0.684369	0.724804	0.37988	PRKAB2/PRKAG1/PRKAG2	3
R-HSA-2980736	Peptide hormone metabolism	1/142	89/10955	0.688355	0.726878	0.380967	IGF1	1
R-HSA-9616222	Transcriptional regulation of granulopoiesis	1/142	89/10955	0.688355	0.726878	0.380967	MYC	1
R-HSA-8876198	RAB GEFs exchange GTP for GDP on RABs	1/142	90/10955	0.692428	0.730104	0.382657	CHM	1
R-HSA-6791226	Major pathway of rRNA processing in the nucleolus and cytosol	2/142	185/10955	0.69569	0.732466	0.383895	RPL23/RPS27L	2
R-HSA-2682334	EPH-Ephrin signaling	1/142	92/10955	0.700415	0.735282	0.385371	MMP2	1
R-HSA-877300	Interferon gamma signaling	1/142	92/10955	0.700415	0.735282	0.385371	ICAM1	1
R-HSA-381119	Unfolded Protein Response (UPR)	1/142	94/10955	0.708197	0.742364	0.389083	NFYC	1
R-HSA-9692914	SARS-CoV-1-host interactions	1/142	96/10955	0.715777	0.749215	0.392674	RPS27L	1
R-HSA-193704	p75 NTR receptor-mediated signalling	1/142	97/10955	0.719494	0.752008	0.394137	HDAC2	1
R-HSA-8868773	rRNA processing in the nucleus and cytosol	2/142	195/10955	0.723085	0.754661	0.395528	RPL23/RPS27L	2
R-HSA-375276	Peptide ligand-binding receptors	2/142	201/10955	0.738512	0.768524	0.402794	BDKRB2/CX3CL1	2
R-HSA-5617833	Cilium Assembly	2/142	201/10955	0.738512	0.768524	0.402794	CDK1/HSP90AA1	2
R-HSA-71387	Metabolism of carbohydrates	3/142	297/10955	0.744936	0.774086	0.405709	GPI/PPP2R1B/PPP2CA	3
R-HSA-397014	Muscle contraction	2/142	205/10955	0.748387	0.775424	0.40641	HIPK2/KAT2B	2
R-HSA-72312	rRNA processing	2/142	205/10955	0.748387	0.775424	0.40641	RPL23/RPS27L	2
R-HSA-425393	Transport of inorganic cations/anions and amino acids/oligopeptides	1/142	108/10955	0.757325	0.782424	0.410079	SLC7A11	1
R-HSA-8957275	Post-translational protein phosphorylation	1/142	108/10955	0.757325	0.782424	0.410079	SHISA5	1
R-HSA-9748784	Drug ADME	1/142	110/10955	0.763638	0.78781	0.412902	ABCB1	1
R-HSA-1483257	Phospholipid metabolism	2/142	212/10955	0.764905	0.787984	0.412993	PIP4K2C/CSNK2A2	2
R-HSA-5173105	O-linked glycosylation	1/142	111/10955	0.766733	0.788733	0.413386	THBS1	1
R-HSA-373760	L1CAM interactions	1/142	119/10955	0.790085	0.811592	0.425366	CSNK2A2	1
R-HSA-373076	Class A/1 (Rhodopsin-like receptors)	3/142	336/10955	0.815774	0.835855	0.438083	BDKRB2/ADORA2B/CX3CL1	3
R-HSA-1483206	Glycerophospholipid biosynthesis	1/142	129/10955	0.816037	0.835855	0.438083	CSNK2A2	1
R-HSA-6809371	Formation of the cornified envelope	1/142	130/10955	0.81845	0.837131	0.438752	PERP	1
R-HSA-198933	Immunoregulatory interactions between a Lymphoid and a non-Lymphoid cell	1/142	134/10955	0.827792	0.845479	0.443127	ICAM1	1
R-HSA-1474228	Degradation of the extracellular matrix	1/142	140/10955	0.840916	0.857663	0.449513	MMP2	1
R-HSA-3781865	Diseases of glycosylation	1/142	143/10955	0.847101	0.862744	0.452176	THBS1	1
R-HSA-8957322	Metabolism of steroids	1/142	154/10955	0.867804	0.882576	0.46257	NFYC	1
R-HSA-418555	G alpha (s) signalling events	1/142	158/10955	0.874621	0.888249	0.465543	ADORA2B	1
R-HSA-72766	Translation	2/142	292/10955	0.89607	0.908744	0.476285	RPL23/RPS27L	2
R-HSA-112316	Neuronal System	3/142	410/10955	0.905257	0.916764	0.480489	PRKAB2/PRKAG1/PRKAG2	3
R-HSA-948021	Transport to the Golgi and subsequent modification	1/142	185/10955	0.912341	0.922636	0.483566	FUCA1	1
R-HSA-196854	Metabolism of vitamins and cofactors	1/142	191/10955	0.919053	0.928114	0.486437	HSP90AA1	1
R-HSA-6805567	Keratinization	1/142	215/10955	0.941165	0.949107	0.49744	PERP	1
R-HSA-416476	G alpha (q) signalling events	1/142	217/10955	0.942711	0.949331	0.497557	BDKRB2	1
R-HSA-500792	GPCR ligand binding	3/142	469/10955	0.946248	0.951557	0.498724	BDKRB2/ADORA2B/CX3CL1	3
R-HSA-425407	SLC-mediated transmembrane transport	1/142	248/10955	0.962104	0.965299	0.505926	SLC7A11	1
R-HSA-5668914	Diseases of metabolism	1/142	249/10955	0.962606	0.965299	0.505926	THBS1	1
R-HSA-446203	Asparagine N-linked glycosylation	1/142	304/10955	0.982092	0.983464	0.515447	FUCA1	1
R-HSA-9012999	RHO GTPase cycle	1/142	449/10955	0.997476	0.997476	0.522791	HSP90AA1	1
