# Supplementary material for: Gain of 1q confers an MDM4-driven growth advantage to undifferentiated and differentiating hESC while altering their differentiation capacity
Source: Research Square preprint supplement (doi:10.21203/rs.3.rs-3467111/v1), 2023-12-13
Supplement: Supplementary file 5 [file cfb83a13d0bb5f2016080566.xlsx]

## Sheet: NE_gsea_Canonical_pathways
pathway	pval	padj	log2err	ES	NES	size
KEGG_GLYCOLYSIS_GLUCONEOGENESIS	1.18821e-06	0.000457908	0.643552	0.707377	2.06478	40
WP_GLYCOLYSIS_AND_GLUCONEOGENESIS	4.26573e-06	0.00119557	0.610527	0.731448	2.04142	32
REACTOME_ARACHIDONIC_ACID_METABOLISM	3.45609e-05	0.00665946	0.557332	0.743518	1.9738	26
REACTOME_EUKARYOTIC_TRANSLATION_ELONGATION	1.05903e-05	0.00233213	0.593325	0.567505	1.86147	90
KEGG_ARACHIDONIC_ACID_METABOLISM	0.000501764	0.0413674	0.477271	0.706649	1.85513	24
WP_CYTOPLASMIC_RIBOSOMAL_PROTEINS	9.02371e-06	0.00214001	0.593325	0.563894	1.84578	86
KEGG_GRAFT_VERSUS_HOST_DISEASE	0.000255277	0.0291488	0.498493	0.840809	1.8313	11
KEGG_ALLOGRAFT_REJECTION	0.00039259	0.0354214	0.498493	0.853927	1.82884	10
KEGG_AUTOIMMUNE_THYROID_DISEASE	0.00039259	0.0354214	0.498493	0.853927	1.82884	10
KEGG_PROXIMAL_TUBULE_BICARBONATE_RECLAMATION	0.000667275	0.0479107	0.477271	0.725957	1.81146	19
REACTOME_TNFR1_INDUCED_PROAPOPTOTIC_SIGNALING	0.000801853	0.0525981	0.477271	0.700994	1.80736	22
WP_GLYCOSAMINOGLYCAN_DEGRADATION	0.000706031	0.048371	0.477271	0.780922	1.80396	14
REACTOME_SELENOAMINO_ACID_METABOLISM	4.6021e-05	0.00747478	0.557332	0.537489	1.80189	103
KEGG_COMPLEMENT_AND_COAGULATION_CASCADES	0.000732641	0.0491029	0.477271	0.643221	1.79519	32
WP_EICOSANOID_SYNTHESIS	0.00149333	0.0837079	0.45506	0.766009	1.76951	14
REACTOME_PYRUVATE_METABOLISM	0.00288004	0.110301	0.431708	0.653159	1.73393	26
KEGG_PENTOSE_PHOSPHATE_PATHWAY	0.00203299	0.0958839	0.431708	0.680359	1.73224	21
REACTOME_FATTY_ACID_METABOLISM	3.76223e-05	0.00682292	0.557332	0.502042	1.72987	125
KEGG_PEROXISOME	0.000501574	0.0413674	0.477271	0.541076	1.72977	70
KEGG_RIBOSOME	0.00030516	0.0313603	0.498493	0.525849	1.71871	84
KEGG_ANTIGEN_PROCESSING_AND_PRESENTATION	0.00170072	0.0879651	0.45506	0.578454	1.70612	42
REACTOME_INTERFERON_ALPHA_BETA_SIGNALING	0.00213032	0.0958839	0.431708	0.574675	1.70228	45
KEGG_ASTHMA	0.000178756	0.0236595	0.518848	0.961548	1.69999	5
REACTOME_GLUCONEOGENESIS	0.00475179	0.143625	0.407018	0.64014	1.69936	26
NABA_BASEMENT_MEMBRANES	0.00442576	0.140449	0.407018	0.605495	1.69833	33
NABA_MATRISOME_ASSOCIATED	1.84117e-07	0.000113526	0.690132	0.448516	1.69376	347
KEGG_OTHER_GLYCAN_DEGRADATION	0.00714827	0.162086	0.407018	0.737629	1.68547	13
WP_PROSTAGLANDIN_SYNTHESIS_AND_REGULATION	0.00321682	0.116676	0.431708	0.62289	1.68471	28
WP_ETHER_LIPID_BIOSYNTHESIS	0.00415643	0.137788	0.407018	0.674921	1.68412	19
WP_TYROBP_CAUSAL_NETWORK_IN_MICROGLIA	0.00160761	0.0875597	0.45506	0.590788	1.68267	36
NABA_ECM_REGULATORS	0.000179405	0.0236595	0.518848	0.489082	1.68169	126
NABA_ECM_AFFILIATED	0.000402124	0.0354214	0.498493	0.512896	1.67925	85
NABA_MATRISOME	1.0656e-09	1.64262e-06	0.788187	0.434824	1.67242	530
PID_INTEGRIN4_PATHWAY	0.00513028	0.147819	0.407018	0.780189	1.67091	10
KEGG_INTESTINAL_IMMUNE_NETWORK_FOR_IGA_PRODUCTION	0.00581229	0.153156	0.407018	0.693798	1.67015	16
REACTOME_SYNTHESIS_OF_LEUKOTRIENES_LT_AND_EOXINS_EX	0.00192728	0.0943144	0.45506	0.841509	1.66948	8
REACTOME_NEGATIVE_REGULATORS_OF_DDX58_IFIH1_SIGNALING	0.00480588	0.14385	0.407018	0.596473	1.66472	32
BIOCARTA_EICOSANOID_PATHWAY	0.00567669	0.153156	0.407018	0.775057	1.65992	10
REACTOME_INDUCTION_OF_CELL_CELL_FUSION	0.00598026	0.153381	0.407018	0.774091	1.65785	10
REACTOME_ERYTHROPOIETIN_ACTIVATES_STAT5	0.0027374	0.108197	0.431708	0.885194	1.65386	6
KEGG_TYPE_I_DIABETES_MELLITUS	0.00957206	0.181047	0.38073	0.699328	1.64848	15
REACTOME_TRANSPORT_OF_ORGANIC_ANIONS	0.00317537	0.116544	0.431708	0.881024	1.64607	6
WP_LIPID_METABOLISM_PATHWAY	0.00800824	0.165221	0.38073	0.622289	1.64089	25
KEGG_SYSTEMIC_LUPUS_ERYTHEMATOSUS	0.0128534	0.201152	0.38073	0.635092	1.63745	22
REACTOME_ION_CHANNEL_TRANSPORT	0.000398772	0.0354214	0.498493	0.466855	1.63128	139
WP_COMPLEMENT_AND_COAGULATION_CASCADES	0.00385101	0.131919	0.431708	0.591761	1.63029	30
WP_DEGRADATION_PATHWAY_OF_SPHINGOLIPIDS_INCLUDING_DISEASES	0.00838464	0.165544	0.38073	0.704353	1.62708	14
REACTOME_CYTOSOLIC_SULFONATION_OF_SMALL_MOLECULES	0.0113836	0.193899	0.38073	0.669948	1.62499	17
REACTOME_COMPLEMENT_CASCADE	0.00763002	0.163879	0.407018	0.637514	1.62315	21
REACTOME_RESPONSE_OF_EIF2AK4_GCN2_TO_AMINO_ACID_DEFICIENCY	0.00138262	0.0789371	0.45506	0.487869	1.62285	98
WP_SARSCOV2_AND_COVID19_PATHWAY	0.00547614	0.151659	0.407018	0.842936	1.62208	7
WP_AEROBIC_GLYCOLYSIS	0.010815	0.190681	0.38073	0.730256	1.62065	12
REACTOME_EFFECTS_OF_PIP2_HYDROLYSIS	0.015306	0.223642	0.38073	0.616096	1.61741	24
WP_CORI_CYCLE	0.00983232	0.183522	0.38073	0.699949	1.61691	14
WP_7OXOC_AND_7BETAHC_PATHWAYS	0.0136982	0.211115	0.38073	0.659292	1.61237	18
REACTOME_ENDOSOMAL_VACUOLAR_PATHWAY	0.0054482	0.151659	0.407018	0.811971	1.61088	8
KEGG_PYRUVATE_METABOLISM	0.00965922	0.181582	0.38073	0.573748	1.60929	33
WP_HYPOTHETICAL_CRANIOFACIAL_DEVELOPMENT_PATHWAY	0.00655299	0.159078	0.407018	0.835962	1.60866	7
REACTOME_AMYLOID_FIBER_FORMATION	0.00872214	0.169586	0.38073	0.561374	1.60761	37
BIOCARTA_RHO_PATHWAY	0.0125063	0.198129	0.38073	0.637596	1.60434	20
REACTOME_BIOSYNTHESIS_OF_SPECIALIZED_PRORESOLVING_MEDIATORS_SPMS	0.0109753	0.192255	0.38073	0.774407	1.5989	9
KEGG_CARDIAC_MUSCLE_CONTRACTION	0.00578716	0.153156	0.407018	0.50907	1.59779	62
REACTOME_NICOTINAMIDE_SALVAGING	0.0168488	0.227828	0.352488	0.677218	1.59636	15
REACTOME_TIGHT_JUNCTION_INTERACTIONS	0.0230432	0.271153	0.352488	0.617818	1.59291	22
REACTOME_PD_1_SIGNALING	0.00820709	0.165544	0.38073	0.82689	1.5912	7
REACTOME_ION_HOMEOSTASIS	0.00679165	0.161067	0.407018	0.539742	1.59061	43
WP_THIAMINE_METABOLIC_PATHWAYS	0.0119564	0.197025	0.38073	0.769065	1.58787	9
WP_MITOCHONDRIAL_IMMUNE_RESPONSE_TO_SARSCOV2	0.0118236	0.197025	0.38073	0.622786	1.58565	21
REACTOME_DEFECTIVE_C1GALT1C1_CAUSES_TNPS	0.0187623	0.23807	0.352488	0.739951	1.58474	10
REACTOME_PRE_NOTCH_PROCESSING_IN_GOLGI	0.0182245	0.237072	0.352488	0.646653	1.58146	18
PID_RHOA_REG_PATHWAY	0.00831295	0.165544	0.38073	0.535035	1.57673	43
WP_LEUKOTRIENE_METABOLIC_PATHWAY	0.00803863	0.165221	0.38073	0.793724	1.57468	8
NABA_PROTEOGLYCANS	0.0194156	0.242341	0.352488	0.643494	1.57374	18
REACTOME_ION_TRANSPORT_BY_P_TYPE_ATPASES	0.00935924	0.178125	0.38073	0.528654	1.57363	46
KEGG_GALACTOSE_METABOLISM	0.0162465	0.224609	0.352488	0.625014	1.57268	20
WP_KREBS_CYCLE_DISORDERS	0.019551	0.243047	0.352488	0.708621	1.57263	12
REACTOME_MET_RECEPTOR_ACTIVATION	0.00740502	0.163879	0.407018	0.889274	1.57221	5
PID_ALPHA_SYNUCLEIN_PATHWAY	0.0171923	0.231458	0.352488	0.585515	1.57019	27
WP_THYROXINE_THYROID_HORMONE_PRODUCTION	0.0210832	0.255903	0.352488	0.640339	1.56602	18
WP_GPCRS_CLASS_A_RHODOPSINLIKE	0.00601984	0.153381	0.407018	0.493342	1.56551	67
KEGG_AMINO_SUGAR_AND_NUCLEOTIDE_SUGAR_METABOLISM	0.0117658	0.197025	0.38073	0.541464	1.56359	38
PID_IL3_PATHWAY	0.0151013	0.223642	0.38073	0.61353	1.56209	21
WP_DEREGULATION_OF_RAB_AND_RAB_EFFECTOR_GENES_IN_BLADDER_CANCER	0.0242574	0.279211	0.352488	0.660647	1.5573	15
WP_EICOSANOID_METABOLISM_VIA_LIPOOXYGENASES_LOX	0.0239513	0.277601	0.352488	0.646211	1.55559	16
REACTOME_CLASS_A_1_RHODOPSIN_LIKE_RECEPTORS	0.00300882	0.113124	0.431708	0.464645	1.55123	101
REACTOME_SRP_DEPENDENT_COTRANSLATIONAL_PROTEIN_TARGETING_TO_MEMBRANE	0.00347355	0.123597	0.431708	0.457276	1.54878	109
WP_SULFATION_BIOTRANSFORMATION_REACTION	0.0263724	0.288175	0.352488	0.72273	1.54785	10
REACTOME_NUCLEOTIDE_LIKE_PURINERGIC_RECEPTORS	0.0108236	0.190681	0.38073	0.779949	1.54735	8
WP_NAD_BIOSYNTHESIS_II_FROM_TRYPTOPHAN	0.0121699	0.198129	0.38073	0.874246	1.54564	5
WP_HEREDITARY_LEIOMYOMATOSIS_AND_RENAL_CELL_CARCINOMA_PATHWAY	0.0193378	0.242341	0.352488	0.619416	1.54562	19
REACTOME_MUCOPOLYSACCHARIDOSES	0.0268653	0.288175	0.352488	0.721578	1.54539	10
REACTOME_DECTIN_2_FAMILY	0.0251393	0.283991	0.352488	0.69537	1.54322	12
PID_RHODOPSIN_PATHWAY	0.0283441	0.293238	0.352488	0.719532	1.54101	10
REACTOME_GLYCOSPHINGOLIPID_METABOLISM	0.0154357	0.224473	0.38073	0.533271	1.53994	38
WP_COMPLEMENT_ACTIVATION	0.0266037	0.288175	0.352488	0.693212	1.53843	12
REACTOME_NICOTINATE_METABOLISM	0.0289129	0.296655	0.352488	0.585079	1.53598	24
KEGG_REGULATION_OF_AUTOPHAGY	0.0209589	0.2554	0.352488	0.614759	1.53399	19
REACTOME_TNF_SIGNALING	0.0175692	0.233404	0.352488	0.49775	1.53214	55
REACTOME_ACTIVATION_OF_TRKA_RECEPTORS	0.0161773	0.224609	0.352488	0.866137	1.5313	5
REACTOME_NGF_INDEPENDANT_TRKA_ACTIVATION	0.0161773	0.224609	0.352488	0.866137	1.5313	5
REACTOME_TRAF3_DEPENDENT_IRF_ACTIVATION_PATHWAY	0.0408082	0.349884	0.321776	0.669728	1.53032	13
BIOCARTA_LECTIN_PATHWAY	0.0180296	0.235531	0.352488	0.795057	1.52995	7
REACTOME_TRAF6_MEDIATED_IRF7_ACTIVATION	0.0314623	0.308912	0.321776	0.648556	1.5288	15
KEGG_TRYPTOPHAN_METABOLISM	0.0263165	0.288175	0.352488	0.569669	1.5277	27
REACTOME_CARDIAC_CONDUCTION	0.00426391	0.139847	0.407018	0.455162	1.52353	102
REACTOME_ACYL_CHAIN_REMODELLING_OF_PG	0.0327805	0.313858	0.321776	0.709352	1.5192	10
WP_LEPTIN_AND_ADIPONECTIN	0.020587	0.252867	0.352488	0.786719	1.5139	7
REACTOME_TRANSPORT_OF_VITAMINS_NUCLEOSIDES_AND_RELATED_MOLECULES	0.0232839	0.27291	0.352488	0.547345	1.51366	31
REACTOME_METABOLISM_OF_LIPIDS	2.86298e-06	0.000882658	0.627257	0.391865	1.51252	580
REACTOME_LAMININ_INTERACTIONS	0.0299778	0.30007	0.352488	0.563604	1.51143	27
REACTOME_SPHINGOLIPID_METABOLISM	0.0119166	0.197025	0.38073	0.462488	1.50969	80
REACTOME_SYNTHESIS_OF_PC	0.0348392	0.323522	0.321776	0.568121	1.50818	26
REACTOME_PRC2_METHYLATES_HISTONES_AND_DNA	0.0412698	0.349884	0.282013	0.659503	1.50696	13
REACTOME_INITIAL_TRIGGERING_OF_COMPLEMENT	0.0442623	0.357227	0.276501	0.703516	1.5067	10
BIOCARTA_NKCELLS_PATHWAY	0.0333833	0.315707	0.321776	0.65199	1.50612	14
REACTOME_ACYL_CHAIN_REMODELLING_OF_PC	0.041069	0.349884	0.321776	0.637595	1.50296	15
WP_AUTOSOMAL_RECESSIVE_OSTEOPETROSIS_PATHWAYS	0.0459016	0.364729	0.271289	0.701326	1.50201	10
REACTOME_ABC_TRANSPORTERS_IN_LIPID_HOMEOSTASIS	0.0428571	0.351406	0.276501	0.657101	1.50147	13
WP_SEROTONIN_HTR1_GROUP_AND_FOS_PATHWAY	0.0347298	0.32348	0.321776	0.548971	1.50071	29
REACTOME_CS_DS_DEGRADATION	0.0428571	0.351406	0.276501	0.656591	1.5003	13
BIOCARTA_ACE2_PATHWAY	0.0262917	0.288175	0.352488	0.801776	1.498	6
REACTOME_CHOLINE_CATABOLISM	0.02446	0.280335	0.352488	0.846491	1.49657	5
REACTOME_BIOSYNTHESIS_OF_EPA_DERIVED_SPMS	0.0115481	0.195621	0.38073	0.892692	1.49547	4
WP_ACETYLCHOLINE_SYNTHESIS	0.0257542	0.288175	0.352488	0.843978	1.49213	5
WP_GPR143_IN_MELANOCYTES_AND_RETINAL_PIGMENT_EPITHELIUM_CELLS	0.0355533	0.328016	0.321776	0.572377	1.49137	23
REACTOME_ACTIVATION_OF_C3_AND_C5	0.0319072	0.310315	0.321776	0.795674	1.4866	6
BIOCARTA_AKAP13_PATHWAY	0.0491803	0.378112	0.261664	0.693522	1.4853	10
BIOCARTA_COMP_PATHWAY	0.0407342	0.349884	0.321776	0.680535	1.48222	11
REACTOME_PHASE_3_RAPID_REPOLARISATION	0.0293931	0.297156	0.352488	0.837194	1.48013	5
REACTOME_SEROTONIN_NEUROTRANSMITTER_RELEASE_CYCLE	0.0396197	0.348993	0.287857	0.609965	1.4795	17
BIOCARTA_HIF_PATHWAY	0.0437601	0.35597	0.276501	0.639697	1.47772	14
REACTOME_RHOA_GTPASE_CYCLE	0.00246434	0.10267	0.431708	0.423278	1.47766	143
BIOCARTA_GATA3_PATHWAY	0.0508197	0.385904	0.257206	0.689523	1.47674	10
REACTOME_NONSENSE_MEDIATED_DECAY_NMD	0.00649154	0.159078	0.407018	0.434387	1.47645	112
REACTOME_NF_KB_ACTIVATION_THROUGH_FADD_RIP_1_PATHWAY_MEDIATED_BY_CASPASE_8_AND_10	0.0454545	0.363048	0.271289	0.66422	1.47409	12
REACTOME_PEROXISOMAL_LIPID_METABOLISM	0.0469977	0.370573	0.321776	0.554957	1.47323	26
WP_1Q211_COPY_NUMBER_VARIATION_SYNDROME	0.0384615	0.3447	0.287857	0.560713	1.47201	24
REACTOME_DEFECTIVE_FACTOR_IX_CAUSES_HEMOPHILIA_B	0.00472424	0.143625	0.407018	0.950083	1.47126	3
REACTOME_PYRUVATE_METABOLISM_AND_CITRIC_ACID_TCA_CYCLE	0.0280962	0.293238	0.352488	0.482551	1.4708	50
REACTOME_PEPTIDE_LIGAND_BINDING_RECEPTORS	0.0264938	0.288175	0.352488	0.470956	1.46971	60
WP_NUCLEOTIDE_GPCRS	0.0273591	0.290856	0.352488	0.740498	1.46909	8
BIOCARTA_FREE_PATHWAY	0.0331534	0.315469	0.321776	0.761191	1.46478	7
KEGG_GLYCOSAMINOGLYCAN_BIOSYNTHESIS_KERATAN_SULFATE	0.0486224	0.375696	0.261664	0.634031	1.46463	14
REACTOME_SLC_MEDIATED_TRANSMEMBRANE_TRANSPORT	0.0044266	0.140449	0.407018	0.412032	1.46368	166
PID_HIF2PATHWAY	0.042522	0.351406	0.266351	0.52357	1.46125	32
KEGG_VIRAL_MYOCARDITIS	0.02819	0.293238	0.352488	0.494617	1.45885	42
REACTOME_TRANSPORT_OF_BILE_SALTS_AND_ORGANIC_ACIDS_METAL_IONS_AND_AMINE_COMPOUNDS	0.0283387	0.293238	0.352488	0.482685	1.45802	48
WP_GLUCOSE_METABOLISM_IN_TRIPLENEGATIVE_BREAST_CANCER_CELLS	0.0309387	0.306656	0.352488	0.734512	1.45721	8
REACTOME_BETA_OXIDATION_OF_PRISTANOYL_COA	0.0593081	0.415685	0.237794	0.705165	1.45594	9
SA_CASPASE_CASCADE	0.0488959	0.376865	0.257206	0.604754	1.4558	16
REACTOME_HYALURONAN_UPTAKE_AND_DEGRADATION	0.0593081	0.415685	0.237794	0.70485	1.45529	9
REACTOME_ANTIGEN_PRESENTATION_FOLDING_ASSEMBLY_AND_PEPTIDE_LOADING_OF_CLASS_I_MHC	0.0419907	0.349884	0.276501	0.547967	1.45467	26
NABA_CORE_MATRISOME	0.00278785	0.108797	0.431708	0.405586	1.45443	183
PID_EPHA_FWDPATHWAY	0.0419907	0.349884	0.276501	0.547303	1.45291	26
WP_16P112_DISTAL_DELETION_SYNDROME	0.0419907	0.349884	0.276501	0.546959	1.452	26
REACTOME_TNFR1_INDUCED_NFKAPPAB_SIGNALING_PATHWAY	0.0412979	0.349884	0.271289	0.524589	1.45073	31
WP_EFFECTS_OF_NITRIC_OXIDE	0.0372654	0.336918	0.321776	0.753801	1.45056	7
REACTOME_TRANSPORT_OF_SMALL_MOLECULES	4.60658e-05	0.00747478	0.557332	0.377113	1.45004	535
WP_GENE_REGULATORY_NETWORK_MODELLING_SOMITOGENESIS	0.0442177	0.357227	0.282013	0.730822	1.44989	8
WP_PHOTODYNAMIC_THERAPYINDUCED_HIF1_SURVIVAL_SIGNALING	0.0381232	0.342664	0.282013	0.5168	1.44956	33
KEGG_GLYCOSAMINOGLYCAN_DEGRADATION	0.0507132	0.385904	0.252961	0.597028	1.44812	17
NABA_ECM_GLYCOPROTEINS	0.00990341	0.183522	0.38073	0.419155	1.44735	130
WP_CLASSICAL_PATHWAY_OF_STEROIDOGENESIS_WITH_GLUCOCORTICOID_AND_MINERALOCORTICOID_METABOLISM	0.040838	0.349884	0.321776	0.817535	1.44538	5
PID_A6B1_A6B4_INTEGRIN_PATHWAY	0.0408759	0.349884	0.271289	0.49104	1.44374	41
WP_PTDINS45P2_IN_CYTOKINESIS_PATHWAY	0.0606557	0.416485	0.234393	0.673992	1.44348	10
REACTOME_NEUTROPHIL_DEGRANULATION	0.000848703	0.0536019	0.477271	0.383986	1.44289	338
REACTOME_SIGNALING_BY_MST1	0.0242714	0.279211	0.352488	0.86029	1.44119	4
REACTOME_SYNTHESIS_OF_PIPS_AT_THE_PLASMA_MEMBRANE	0.0392679	0.347106	0.321776	0.475226	1.43779	49
WP_SELENIUM_MICRONUTRIENT_NETWORK	0.0331522	0.315469	0.321776	0.461045	1.43687	57
WP_FARNESOID_X_RECEPTOR_PATHWAY	0.0510204	0.386476	0.261664	0.723916	1.43619	8
REACTOME_PLASMA_LIPOPROTEIN_CLEARANCE	0.0454545	0.363048	0.257206	0.511903	1.43582	33
REACTOME_STIMULI_SENSING_CHANNELS	0.026833	0.288175	0.352488	0.446048	1.4354	74
REACTOME_ATTACHMENT_OF_GPI_ANCHOR_TO_UPAR	0.042735	0.351406	0.287857	0.745459	1.4345	7
REACTOME_BUTYROPHILIN_BTN_FAMILY_INTERACTIONS	0.042735	0.351406	0.287857	0.745431	1.43445	7
REACTOME_RHOB_GTPASE_CYCLE	0.0216282	0.260468	0.352488	0.450874	1.43314	68
WP_FLUOROACETIC_ACID_TOXICITY	0.0560272	0.408349	0.248911	0.766229	1.43159	6
BIOCARTA_MALATEX_PATHWAY	0.0578231	0.415257	0.245042	0.721247	1.43089	8
WP_SEROTONIN_RECEPTOR_467_AND_NR3C_SIGNALING	0.0646688	0.428761	0.222056	0.594032	1.42998	16
WP_CHOLESTASIS	0.0666667	0.439174	0.21925	0.625149	1.42846	13
KEGG_VEGF_SIGNALING_PATHWAY	0.0263428	0.288175	0.352488	0.455243	1.42664	61
REACTOME_PURINE_SALVAGE	0.0689655	0.443885	0.21925	0.655007	1.42662	11
BIOCARTA_MHC_PATHWAY	0.0663265	0.437869	0.227987	0.717357	1.42318	8
REACTOME_ERYTHROPOIETIN_ACTIVATES_PHOSPHOLIPASE_C_GAMMA_PLCG	0.0594228	0.415685	0.24134	0.761187	1.42217	6
KEGG_METABOLISM_OF_XENOBIOTICS_BY_CYTOCHROME_P450	0.0502283	0.383302	0.248911	0.530171	1.42177	27
KEGG_NEUROACTIVE_LIGAND_RECEPTOR_INTERACTION	0.0101742	0.184512	0.38073	0.418648	1.42139	111
REACTOME_SYNTHESIS_OF_PROSTAGLANDINS_PG_AND_THROMBOXANES_TX	0.0697279	0.445483	0.222056	0.715955	1.4204	8
REACTOME_RETINOID_CYCLE_DISEASE_EVENTS	0.0628183	0.424713	0.234393	0.760096	1.42013	6
PID_TXA2PATHWAY	0.0481752	0.374398	0.248911	0.481888	1.42011	43
REACTOME_SENSORY_PERCEPTION_OF_TASTE	0.0703125	0.445817	0.2114	0.564228	1.41973	20
WP_TCA_CYCLE_IN_SENESCENCE	0.0754098	0.455312	0.208955	0.662313	1.41846	10
REACTOME_TRAF6_MEDIATED_NF_KB_ACTIVATION	0.0516432	0.388503	0.248911	0.556979	1.4181	21
REACTOME_FORMATION_OF_THE_CORNIFIED_ENVELOPE	0.0482115	0.374398	0.257206	0.53419	1.4181	26
REACTOME_KERATINIZATION	0.0482115	0.374398	0.257206	0.53419	1.4181	26
BIOCARTA_CLASSIC_PATHWAY	0.0598291	0.415685	0.24134	0.73617	1.41663	7
REACTOME_APOPTOTIC_CLEAVAGE_OF_CELL_ADHESION_PROTEINS	0.0731293	0.450015	0.216543	0.712976	1.41449	8
REACTOME_STAT5_ACTIVATION	0.0645161	0.428671	0.231127	0.757034	1.41441	6
REACTOME_INTERLEUKIN_15_SIGNALING	0.0689655	0.443885	0.21925	0.648924	1.41337	11
REACTOME_TRAFFICKING_AND_PROCESSING_OF_ENDOSOMAL_TLR	0.0731293	0.450015	0.216543	0.711975	1.4125	8
WP_VITAMIN_A_AND_CAROTENOID_METABOLISM	0.0497667	0.380722	0.252961	0.531974	1.41222	26
REACTOME_COMMON_PATHWAY_OF_FIBRIN_CLOT_FORMATION	0.0691928	0.444419	0.21925	0.683538	1.41129	9
REACTOME_PEROXISOMAL_PROTEIN_IMPORT	0.0387644	0.345005	0.321776	0.455546	1.41077	56
WP_APOE_AND_MIR146_IN_INFLAMMATION_AND_ATHEROSCLEROSIS	0.0553633	0.405054	0.252961	0.796048	1.40739	5
REACTOME_TRANSCRIPTIONAL_REGULATION_OF_PLURIPOTENT_STEM_CELLS	0.06	0.415685	0.227987	0.53604	1.40724	24
BIOCARTA_STATHMIN_PATHWAY	0.0686901	0.443885	0.216543	0.596417	1.4059	15
WP_MRNA_VACCINE_ACTIVATION_OF_DENDRITIC_CELL_AND_INDUCTION_OF_IFN1	0.0679117	0.440783	0.224966	0.752371	1.4057	6
REACTOME_PI_METABOLISM	0.0378937	0.341598	0.321776	0.436487	1.40464	74
REACTOME_ROLE_OF_PHOSPHOLIPIDS_IN_PHAGOCYTOSIS	0.0758514	0.455312	0.202072	0.562565	1.40376	19
WP_EICOSANOID_METABOLISM_VIA_CYCLOOXYGENASES_COX	0.0788644	0.46049	0.199915	0.582973	1.40336	16
REACTOME_FORMATION_OF_FIBRIN_CLOT_CLOTTING_CASCADE	0.0804416	0.467046	0.197822	0.582741	1.4028	16
WP_SARSCOV2_AND_ACE2_RECEPTOR_MOLECULAR_MECHANISMS	0.0124757	0.198129	0.38073	0.967341	1.40266	2
REACTOME_CHYLOMICRON_CLEARANCE	0.0570934	0.414162	0.248911	0.79334	1.4026	5
REACTOME_SIGNALLING_TO_P38_VIA_RIT_AND_RIN	0.0185269	0.237993	0.352488	0.904871	1.40125	3
KEGG_LYSOSOME	0.0137874	0.211115	0.38073	0.41509	1.40096	108
REACTOME_MRNA_EDITING	0.0588235	0.415685	0.245042	0.792205	1.40059	5
REACTOME_DEFECTIVE_GALNT3_CAUSES_HFTC	0.0757825	0.455312	0.208955	0.678279	1.40043	9
REACTOME_ERYTHROCYTES_TAKE_UP_CARBON_DIOXIDE_AND_RELEASE_OXYGEN	0.0696095	0.445483	0.222056	0.749276	1.39991	6
REACTOME_CELLULAR_RESPONSE_TO_STARVATION	0.0157333	0.224563	0.352488	0.397278	1.39836	150
REACTOME_CD22_MEDIATED_BCR_REGULATION	0.0199198	0.246638	0.352488	0.901899	1.39665	3
REACTOME_ANCHORING_FIBRIL_FORMATION	0.091954	0.490474	0.188204	0.640819	1.39571	11
WP_KISSPEPTINKISSPEPTIN_RECEPTOR_SYSTEM_IN_THE_OVARY	0.0634218	0.42599	0.216543	0.504566	1.39536	31
REACTOME_THE_ACTIVATION_OF_ARYLSULFATASES	0.0901639	0.490225	0.190023	0.651147	1.39455	10
KEGG_CITRATE_CYCLE_TCA_CYCLE	0.0589124	0.415685	0.227987	0.515383	1.39394	28
REACTOME_AMPK_INHIBITS_CHREBP_TRANSCRIPTIONAL_ACTIVATION_ACTIVITY	0.0769231	0.456743	0.2114	0.723581	1.3924	7
REACTOME_TRIGLYCERIDE_BIOSYNTHESIS	0.0790774	0.460861	0.204295	0.674344	1.39231	9
KEGG_DRUG_METABOLISM_CYTOCHROME_P450	0.060423	0.415812	0.224966	0.514752	1.39223	28
WP_15Q112_COPY_NUMBER_VARIATION_SYNDROME	0.0807249	0.467104	0.202072	0.673893	1.39137	9
WP_IL9_SIGNALING_PATHWAY	0.076175	0.455312	0.206588	0.602174	1.39104	14
REACTOME_ACYL_CHAIN_REMODELLING_OF_PI	0.0780985	0.458624	0.208955	0.74373	1.38955	6
WP_PATHOGENESIS_OF_SARSCOV2_MEDIATED_BY_NSP9NSP10_COMPLEX	0.0638298	0.42687	0.237794	0.828579	1.38807	4
REACTOME_EUKARYOTIC_TRANSLATION_INITIATION	0.0159952	0.224609	0.352488	0.405795	1.38704	116
REACTOME_TRIGLYCERIDE_METABOLISM	0.0723077	0.449326	0.206588	0.528223	1.38672	24
WP_NETWORK_MAP_OF_SARSCOV2_SIGNALING_PATHWAY	0.0156722	0.224563	0.352488	0.404221	1.3867	123
REACTOME_HYALURONAN_METABOLISM	0.0876623	0.485165	0.191892	0.624386	1.38569	12
REACTOME_CREB3_FACTORS_ACTIVATE_GENES	0.0854701	0.479099	0.199915	0.718871	1.38334	7
REACTOME_OVARIAN_TUMOR_DOMAIN_PROTEASES	0.0735931	0.451068	0.197822	0.48677	1.38072	34
REACTOME_PHOSPHOLIPID_METABOLISM	0.0187471	0.23807	0.352488	0.386634	1.38015	170
WP_OMEGA3_OMEGA6_FATTY_ACID_SYNTHESIS	0.0904762	0.490225	0.186433	0.603622	1.37927	13
REACTOME_NUCLEOTIDE_SALVAGE	0.0851393	0.478986	0.190023	0.552393	1.37837	19
BIOCARTA_LEPTIN_PATHWAY	0.0884354	0.486868	0.195789	0.694268	1.37737	8
WP_BENZOAPYRENE_METABOLISM	0.0761246	0.455312	0.213928	0.778648	1.37663	5
REACTOME_PHASE_II_CONJUGATION_OF_COMPOUNDS	0.0574564	0.414843	0.321776	0.43567	1.376	64
KEGG_CELL_ADHESION_MOLECULES_CAMS	0.0418354	0.349884	0.257206	0.420561	1.37554	83
PID_SYNDECAN_3_PATHWAY	0.0940032	0.493422	0.184706	0.595134	1.37478	14
REACTOME_ALTERNATIVE_COMPLEMENT_ACTIVATION	0.0293976	0.297156	0.352488	0.887352	1.37412	3
WP_DISORDERS_OF_GALACTOSE_METABOLISM	0.104918	0.50779	0.175204	0.641046	1.37292	10
REACTOME_INTERLEUKIN_2_SIGNALING	0.0957265	0.495176	0.188204	0.713348	1.37271	7
REACTOME_MUSCLE_CONTRACTION	0.0176397	0.233404	0.352488	0.389105	1.37211	155
WP_MTHFR_DEFICIENCY	0.09375	0.493422	0.181383	0.545277	1.37204	20
WP_TCELL_ANTIGEN_RECEPTOR_TCR_PATHWAY_DURING_STAPHYLOCOCCUS_AUREUS_INFECTION	0.065407	0.432725	0.2114	0.465142	1.37191	42
REACTOME_SARS_COV_1_MODULATES_HOST_TRANSLATION_MACHINERY	0.0829694	0.471946	0.186433	0.48267	1.37145	35
REACTOME_RUNX1_AND_FOXP3_CONTROL_THE_DEVELOPMENT_OF_REGULATORY_T_LYMPHOCYTES_TREGS	0.0299575	0.30007	0.352488	0.885556	1.37134	3
WP_SARSCOV2_ALTERING_ANGIOGENESIS_VIA_NRP1	0.0673759	0.440147	0.231127	0.818559	1.37128	4
WP_HOSTPATHOGEN_INTERACTION_OF_HUMAN_CORONAVIRUSES_AUTOPHAGY	0.0975232	0.496495	0.176694	0.548869	1.36958	19
REACTOME_PHOSPHORYLATION_OF_EMI1	0.098472	0.497718	0.184706	0.732956	1.36942	6
WP_ALLOGRAFT_REJECTION	0.0821114	0.470538	0.188204	0.480731	1.36921	36
REACTOME_REGULATION_OF_PYRUVATE_DEHYDROGENASE_PDH_COMPLEX	0.100486	0.500483	0.17822	0.592477	1.36864	14
REACTOME_VITAMIN_B1_THIAMIN_METABOLISM	0.0778547	0.458065	0.2114	0.773567	1.36764	5
REACTOME_FERTILIZATION	0.0901361	0.490225	0.193813	0.689115	1.36715	8
REACTOME_INTERLEUKIN_37_SIGNALING	0.0993691	0.499763	0.176694	0.567489	1.36609	16
REACTOME_RAB_GERANYLGERANYLATION	0.0399429	0.349841	0.271289	0.434949	1.36515	62
REACTOME_INTRINSIC_PATHWAY_OF_FIBRIN_CLOT_FORMATION	0.106557	0.508492	0.173748	0.637415	1.36514	10
BIOCARTA_ALTERNATIVE_PATHWAY	0.0673759	0.440147	0.231127	0.814696	1.36481	4
KEGG_LEISHMANIA_INFECTION	0.0671533	0.440147	0.208955	0.463681	1.3633	41
REACTOME_ACTIVATION_OF_THE_PHOTOTRANSDUCTION_CASCADE	0.0595903	0.415685	0.252961	0.880181	1.36302	3
REACTOME_GLYCOLYSIS	0.0413695	0.349884	0.266351	0.434217	1.36285	62
WP_VITAMIN_D_RECEPTOR_PATHWAY	0.0364109	0.332115	0.271289	0.405585	1.36275	104
WP_OXYSTEROLS_DERIVED_FROM_CHOLESTEROL	0.0892308	0.489499	0.184706	0.518949	1.36237	24
WP_PATHWAYS_OF_NUCLEIC_ACID_METABOLISM_AND_INNATE_IMMUNE_SENSING	0.106557	0.508492	0.173748	0.635552	1.36115	10
BIOCARTA_EPO_PATHWAY	0.100318	0.500483	0.176694	0.555055	1.35745	18
BIOCARTA_AMI_PATHWAY	0.108197	0.508492	0.172324	0.633516	1.35679	10
REACTOME_DOPAMINE_NEUROTRANSMITTER_RELEASE_CYCLE	0.0954617	0.494864	0.179782	0.532563	1.35594	21
REACTOME_SYNTHESIS_OF_LIPOXINS_LX	0.0524345	0.391574	0.271289	0.934973	1.35573	2
REACTOME_MITOCHONDRIAL_FATTY_ACID_BETA_OXIDATION	0.0752212	0.455312	0.197822	0.490146	1.35548	31
WP_BIOTIN_METABOLISM_INCLUDING_IMDS	0.103789	0.507049	0.176694	0.656312	1.35508	9
KEGG_FRUCTOSE_AND_MANNOSE_METABOLISM	0.0762053	0.455312	0.202072	0.509804	1.35337	26
REACTOME_INTERFERON_GAMMA_SIGNALING	0.0442225	0.357227	0.257206	0.431137	1.35318	62
REACTOME_GAMMA_CARBOXYLATION_HYPUSINE_FORMATION_AND_ARYLSULFATASE_ACTIVATION	0.0835777	0.472789	0.186433	0.482392	1.35305	33
REACTOME_PHASE_4_RESTING_MEMBRANE_POTENTIAL	0.107143	0.508492	0.172324	0.609111	1.35179	12
REACTOME_POU5F1_OCT4_SOX2_NANOG_REPRESS_GENES_RELATED_TO_DIFFERENTIATION	0.107692	0.508492	0.176694	0.702447	1.35173	7
REACTOME_DEACTIVATION_OF_THE_BETA_CATENIN_TRANSACTIVATING_COMPLEX	0.070073	0.445483	0.204295	0.462999	1.35146	40
PID_PLK1_PATHWAY	0.0677467	0.440639	0.208955	0.456119	1.3511	45
WP_PI3KAKTMTOR_VITAMIN_D3_SIGNALING	0.113452	0.512944	0.166934	0.584232	1.3496	14
REACTOME_TOXICITY_OF_BOTULINUM_TOXIN_TYPE_D_BOTD	0.0968858	0.496448	0.188204	0.762502	1.34808	5
REACTOME_POU5F1_OCT4_SOX2_NANOG_ACTIVATE_GENES_RELATED_TO_PROLIFERATION	0.116585	0.516906	0.165657	0.618225	1.3465	11
REACTOME_SODIUM_PROTON_EXCHANGERS	0.107692	0.508492	0.176694	0.699674	1.3464	7
REACTOME_FCGR_ACTIVATION	0.11545	0.515097	0.169571	0.720424	1.34601	6
REACTOME_RAB_GEFS_EXCHANGE_GTP_FOR_GDP_ON_RABS	0.0472335	0.37072	0.24134	0.409971	1.34504	89
REACTOME_HEME_BIOSYNTHESIS	0.113636	0.512944	0.166934	0.605816	1.34448	12
REACTOME_DEFECTS_IN_BIOTIN_BTN_METABOLISM	0.0952381	0.494864	0.188204	0.676879	1.34287	8
REACTOME_BLOOD_GROUP_SYSTEMS_BIOSYNTHESIS	0.116694	0.516906	0.164406	0.580954	1.34202	14
REACTOME_TACHYKININ_RECEPTORS_BIND_TACHYKININS	0.0580524	0.415257	0.257206	0.925413	1.34187	2
REACTOME_PURINERGIC_SIGNALING_IN_LEISHMANIASIS_INFECTION	0.111821	0.512126	0.166934	0.569192	1.34172	15
REACTOME_BIOSYNTHESIS_OF_MARESINS	0.0833333	0.472273	0.206588	0.800583	1.34117	4
WP_MICRORNA_FOR_TARGETING_CANCER_GROWTH_AND_VASCULARIZATION_IN_GLIOBLASTOMA	0.112821	0.512126	0.172324	0.696435	1.34016	7
KEGG_BUTANOATE_METABOLISM	0.0944272	0.493422	0.179782	0.507819	1.33904	25
REACTOME_RAB_REGULATION_OF_TRAFFICKING	0.0461538	0.36579	0.237794	0.389939	1.33886	120
REACTOME_ANTIMICROBIAL_PEPTIDES	0.120543	0.527465	0.165657	0.716491	1.33866	6
REACTOME_SYNTHESIS_OF_UDP_N_ACETYL_GLUCOSAMINE	0.0986395	0.497718	0.184706	0.674139	1.33744	8
WP_GLUCOCORTICOID_BIOSYNTHESIS	0.0904255	0.490225	0.197822	0.797181	1.33547	4
WP_CALORIC_RESTRICTION_AND_AGING	0.0986395	0.497718	0.184706	0.672772	1.33472	8
WP_CATALYTIC_CYCLE_OF_MAMMALIAN_FLAVINCONTAINING_MONOOXYGENASES_FMOS	0.0856611	0.479298	0.208955	0.8617	1.3344	3
REACTOME_SYNTHESIS_OF_PIPS_AT_THE_GOLGI_MEMBRANE	0.124601	0.535765	0.157403	0.565787	1.33369	15
REACTOME_GPCR_LIGAND_BINDING	0.033877	0.317456	0.276501	0.374794	1.33062	164
REACTOME_GDP_FUCOSE_BIOSYNTHESIS	0.0975177	0.496495	0.190023	0.792302	1.3273	4
WP_DISORDERS_OF_BILE_ACID_SYNTHESIS_AND_BILIARY_TRANSPORT	0.128247	0.543401	0.156312	0.597846	1.32679	12
WP_CEREBRAL_ORGANIC_ACIDURIAS_INCLUDING_DISEASES	0.108844	0.509203	0.175204	0.668561	1.32637	8
KEGG_PHENYLALANINE_METABOLISM	0.128247	0.543401	0.156312	0.59727	1.32551	12
REACTOME_SCAVENGING_BY_CLASS_A_RECEPTORS	0.123177	0.532347	0.159647	0.573135	1.32396	14
REACTOME_ERYTHROPOIETIN_ACTIVATES_PHOSPHOINOSITIDE_3_KINASE_PI3K	0.131148	0.547711	0.155242	0.618184	1.32395	10
REACTOME_GLYOXYLATE_METABOLISM_AND_GLYCINE_DEGRADATION	0.120556	0.527465	0.157403	0.507935	1.32347	23
REACTOME_DISEASES_ASSOCIATED_WITH_GLYCOSYLATION_PRECURSOR_BIOSYNTHESIS	0.135783	0.552996	0.15017	0.561257	1.32302	15
REACTOME_ACTIVATION_OF_MATRIX_METALLOPROTEINASES	0.130159	0.545958	0.153159	0.578402	1.32164	13
WP_MEVALONATE_ARM_OF_CHOLESTEROL_BIOSYNTHESIS_PATHWAY	0.131494	0.547711	0.154191	0.59517	1.32085	12
KEGG_ETHER_LIPID_METABOLISM	0.116099	0.515754	0.160801	0.512088	1.32031	22
REACTOME_SULFIDE_OXIDATION_TO_SULFATE	0.129032	0.544195	0.159647	0.706077	1.3192	6
REACTOME_ORGANIC_ANION_TRANSPORTERS	0.108156	0.508492	0.179782	0.786867	1.31819	4
WP_PROXIMAL_TUBULE_TRANSPORT	0.101892	0.504228	0.166934	0.463366	1.31661	35
REACTOME_PROLACTIN_RECEPTOR_SIGNALING	0.139573	0.558922	0.15017	0.604424	1.31644	11
WP_CHRONIC_HYPERGLYCEMIA_IMPAIRMENT_OF_NEURON_FUNCTION	0.107303	0.508492	0.164406	0.481561	1.31643	29
PID_AURORA_B_PATHWAY	0.100437	0.500483	0.168238	0.459336	1.31541	37
WP_TYPE_I_COLLAGEN_SYNTHESIS_IN_THE_CONTEXT_OF_OSTEOGENESIS_IMPERFECTA	0.111773	0.512126	0.160801	0.48116	1.31534	29
PID_INTEGRIN1_PATHWAY	0.0711238	0.446588	0.199915	0.420978	1.315	59
REACTOME_BIOLOGICAL_OXIDATIONS	0.0512821	0.387506	0.224966	0.382497	1.31469	124
KEGG_VALINE_LEUCINE_AND_ISOLEUCINE_BIOSYNTHESIS	0.131624	0.547711	0.158514	0.68268	1.3137	7
REACTOME_HISTIDINE_CATABOLISM	0.137521	0.557133	0.154191	0.702847	1.31317	6
BIOCARTA_IL3_PATHWAY	0.133117	0.55071	0.153159	0.591598	1.31293	12
REACTOME_P2Y_RECEPTORS	0.115917	0.515688	0.170932	0.742099	1.31201	5
WP_GLYCOSPHINGOLIPID_METABOLISM	0.140127	0.558922	0.147331	0.536238	1.31143	18
REACTOME_SIGNALING_BY_RETINOIC_ACID	0.10472	0.50779	0.165657	0.475954	1.31125	30
REACTOME_TRP_CHANNELS	0.131537	0.547711	0.152145	0.540547	1.31113	17
REACTOME_METABOLISM_OF_WATER_SOLUBLE_VITAMINS_AND_COFACTORS	0.0631579	0.42599	0.204295	0.391672	1.31101	102
REACTOME_NCAM1_INTERACTIONS	0.104803	0.50779	0.164406	0.457407	1.30988	37
PID_GMCSF_PATHWAY	0.0967742	0.496448	0.172324	0.469334	1.30988	32
REACTOME_SIGNALING_BY_MAPK_MUTANTS	0.135043	0.55071	0.156312	0.680492	1.30948	7
REACTOME_FCERI_MEDIATED_CA_2_MOBILIZATION	0.128483	0.543401	0.152145	0.507766	1.30917	22
REACTOME_NOSTRIN_MEDIATED_ENOS_TRAFFICKING	0.117647	0.518893	0.169571	0.740141	1.30855	5
WP_METABOLIC_REPROGRAMMING_IN_COLON_CANCER	0.0948905	0.494168	0.173748	0.44826	1.30844	40
REACTOME_OTHER_SEMAPHORIN_INTERACTIONS	0.14511	0.572091	0.143759	0.54345	1.30822	16
WP_LINOLEIC_ACID_METABOLISM_AFFECTED_BY_SARSCOV2	0.117647	0.518893	0.169571	0.73954	1.30748	5
REACTOME_INSERTION_OF_TAIL_ANCHORED_PROTEINS_INTO_THE_ENDOPLASMIC_RETICULUM_MEMBRANE	0.134675	0.55071	0.148262	0.52379	1.307	19
REACTOME_REGULATION_OF_TP53_ACTIVITY_THROUGH_ASSOCIATION_WITH_CO_FACTORS	0.14127	0.561107	0.146416	0.571993	1.307	13
REACTOME_DNA_METHYLATION	0.125887	0.539039	0.165657	0.779998	1.30668	4
WP_METAPATHWAY_BIOTRANSFORMATION_PHASE_I_AND_II	0.0634082	0.42599	0.204295	0.391222	1.3061	101
REACTOME_ACYL_CHAIN_REMODELING_OF_DAG_AND_TAG	0.119377	0.525771	0.168238	0.738746	1.30608	5
WP_TCA_CYCLE_AND_DEFICIENCY_OF_PYRUVATE_DEHYDROGENASE_COMPLEX_PDHC	0.154952	0.5835	0.1396	0.553387	1.30447	15
REACTOME_DEGRADATION_OF_THE_EXTRACELLULAR_MATRIX	0.060241	0.415812	0.2114	0.393015	1.30385	96
NABA_SECRETED_FACTORS	0.056962	0.414162	0.2114	0.37384	1.30194	136
WP_METABOLIC_REPROGRAMMING_IN_PANCREATIC_CANCER	0.0963504	0.496448	0.172324	0.445496	1.30037	40
BIOCARTA_INTRINSIC_PATHWAY	0.147783	0.573102	0.145516	0.596559	1.29932	11
REACTOME_REGULATED_PROTEOLYSIS_OF_P75NTR	0.147783	0.573102	0.145516	0.596487	1.29916	11
REACTOME_VITAMIN_C_ASCORBATE_METABOLISM	0.145299	0.572104	0.15017	0.675118	1.29914	7
REACTOME_THE_RETINOID_CYCLE_IN_CONES_DAYLIGHT_VISION	0.0599613	0.415685	0.257206	0.972425	1.29768	1
REACTOME_THE_CITRIC_ACID_TCA_CYCLE_AND_RESPIRATORY_ELECTRON_TRANSPORT	0.0529634	0.391574	0.21925	0.367907	1.29735	155
REACTOME_LINOLEIC_ACID_LA_METABOLISM	0.148718	0.573839	0.148262	0.673314	1.29567	7
BIOCARTA_IL5_PATHWAY	0.0599613	0.415685	0.257206	0.970731	1.29542	1
REACTOME_ALPHA_DEFENSINS	0.0599613	0.415685	0.257206	0.970731	1.29542	1
REACTOME_DEFENSINS	0.0599613	0.415685	0.257206	0.970731	1.29542	1
BIOCARTA_EPONFKB_PATHWAY	0.146623	0.572925	0.146416	0.627309	1.29519	9
WP_SEROTONIN_RECEPTOR_2_AND_ELKSRFGATA4_SIGNALING	0.147385	0.573102	0.142901	0.533745	1.29463	17
REACTOME_TRANSPORT_OF_NUCLEOSIDES_AND_FREE_PURINE_AND_PYRIMIDINE_BASES_ACROSS_THE_PLASMA_MEMBRANE	0.146623	0.572925	0.146416	0.627018	1.29459	9
KEGG_GLYCINE_SERINE_AND_THREONINE_METABOLISM	0.146154	0.572925	0.141225	0.492551	1.29307	24
REACTOME_SYNTHESIS_OF_PA	0.142415	0.563626	0.143759	0.490379	1.29306	25
WP_HEART_DEVELOPMENT	0.112903	0.512126	0.158514	0.463242	1.29288	32
REACTOME_GRB7_EVENTS_IN_ERBB2_SIGNALING	0.138408	0.558922	0.155242	0.73106	1.29249	5
WP_COVID19_ADVERSE_OUTCOME_PATHWAY	0.128492	0.543401	0.168238	0.83459	1.29241	3
REACTOME_ACTIVATION_OF_THE_TFAP2_AP_2_FAMILY_OF_TRANSCRIPTION_FACTORS	0.154098	0.583353	0.142057	0.603251	1.29197	10
REACTOME_SLC_TRANSPORTER_DISORDERS	0.0760563	0.455312	0.191892	0.408248	1.29187	65
WP_NONCLASSICAL_ROLE_OF_VITAMIN_D	0.104869	0.50779	0.188204	0.890804	1.29168	2
REACTOME_VLDL_CLEARANCE	0.141844	0.562089	0.155242	0.771041	1.29168	4
REACTOME_CROSSLINKING_OF_COLLAGEN_FIBRILS	0.159744	0.591456	0.137251	0.547845	1.2914	15
WP_NEOLACTO_SERIES_SPHINGOLIPID_METABOLISM	0.149918	0.575587	0.144631	0.625316	1.29108	9
PID_TRKR_PATHWAY	0.100282	0.500483	0.165657	0.413161	1.28987	58
REACTOME_EPITHELIAL_MESENCHYMAL_TRANSITION_EMT_DURING_GASTRULATION	0.140138	0.558922	0.154191	0.729506	1.28974	5
REACTOME_ACTIVATED_NOTCH1_TRANSMITS_SIGNAL_TO_THE_NUCLEUS	0.115044	0.514777	0.157403	0.466212	1.28929	31
WP_ARYLAMINE_METABOLISM	0.073501	0.451068	0.231127	0.966057	1.28918	1
REACTOME_GLUCOSE_METABOLISM	0.0870748	0.482848	0.175204	0.398565	1.28903	77
KEGG_HISTIDINE_METABOLISM	0.148377	0.573839	0.140406	0.49449	1.28843	23
WP_RENINANGIOTENSINALDOSTERONE_SYSTEM_RAAS	0.123894	0.53347	0.151149	0.467427	1.28775	30
REACTOME_G_PROTEIN_BETA_GAMMA_SIGNALLING	0.145511	0.572207	0.142057	0.487713	1.28603	25
WP_GAMMAGLUTAMYL_CYCLE_FOR_THE_BIOSYNTHESIS_AND_DEGRADATION_OF_GLUTATHIONE_INCLUDING_DISEASES	0.162988	0.594973	0.140406	0.687362	1.28424	6
REACTOME_INNATE_IMMUNE_SYSTEM	0.00223926	0.0958839	0.431708	0.330141	1.28344	713
WP_NANOPARTICLE_TRIGGERED_REGULATED_NECROSIS	0.159802	0.591456	0.1396	0.62151	1.28322	9
REACTOME_MECP2_REGULATES_TRANSCRIPTION_FACTORS	0.156028	0.585201	0.147331	0.765698	1.28273	4
REACTOME_ECM_PROTEOGLYCANS	0.0827389	0.471867	0.184706	0.408513	1.28218	62
BIOCARTA_SODD_PATHWAY	0.142857	0.564652	0.151149	0.644592	1.27882	8
WP_17Q12_COPY_NUMBER_VARIATION_SYNDROME	0.105932	0.508492	0.160801	0.409574	1.27867	58
REACTOME_IMMUNOREGULATORY_INTERACTIONS_BETWEEN_A_LYMPHOID_AND_A_NON_LYMPHOID_CELL	0.115328	0.515097	0.156312	0.437048	1.27571	40
REACTOME_G_ALPHA_I_SIGNALLING_EVENTS	0.0640704	0.427552	0.197822	0.36105	1.27556	156
REACTOME_DISEASES_OF_METABOLISM	0.0545455	0.40039	0.2114	0.353058	1.27437	202
REACTOME_METABOLISM_OF_PORPHYRINS	0.176752	0.617339	0.129443	0.520707	1.27345	18
REACTOME_GP1B_IX_V_ACTIVATION_SIGNALLING	0.174629	0.614592	0.132846	0.616558	1.273	9
REACTOME_SYNTHESIS_OF_5_EICOSATETRAENOIC_ACIDS	0.163121	0.594973	0.143759	0.759557	1.27244	4
REACTOME_DEATH_RECEPTOR_SIGNALING	0.0719697	0.449326	0.186433	0.36274	1.27062	145
REACTOME_MHC_CLASS_II_ANTIGEN_PRESENTATION	0.0878113	0.485165	0.170932	0.378923	1.27031	103
PID_P38_ALPHA_BETA_DOWNSTREAM_PATHWAY	0.129032	0.544195	0.147331	0.445793	1.2697	36
REACTOME_CLASS_I_PEROXISOMAL_MEMBRANE_PROTEIN_IMPORT	0.160938	0.592089	0.135002	0.504544	1.26955	20
REACTOME_DEFECTIVE_CHST14_CAUSES_EDS_MUSCULOCONTRACTURAL_TYPE	0.163265	0.594973	0.140406	0.639762	1.26924	8
WP_FIBRIN_COMPLEMENT_RECEPTOR_3_SIGNALING_PATHWAY	0.16	0.591463	0.134273	0.483278	1.26873	24
REACTOME_SODIUM_COUPLED_SULPHATE_DI_AND_TRI_CARBOXYLATE_TRANSPORTERS	0.140449	0.559439	0.160801	0.87473	1.26838	2
KEGG_GLYCOSPHINGOLIPID_BIOSYNTHESIS_GLOBO_SERIES	0.165316	0.598906	0.135741	0.548732	1.26759	14
KEGG_TIGHT_JUNCTION	0.0917313	0.490474	0.165657	0.372012	1.26445	112
WP_STEROID_BIOSYNTHESIS	0.171986	0.611146	0.1396	0.75478	1.26444	4
PID_CONE_PATHWAY	0.184514	0.627185	0.128789	0.611799	1.26317	9
PID_ECADHERIN_KERATINOCYTE_PATHWAY	0.16875	0.604247	0.131458	0.500229	1.25869	20
KEGG_ABC_TRANSPORTERS	0.134897	0.55071	0.143759	0.450856	1.25831	32
REACTOME_ALPHA_OXIDATION_OF_PHYTANATE	0.198642	0.644111	0.12564	0.672811	1.25705	6
REACTOME_METABOLISM_OF_AMINO_ACIDS_AND_DERIVATIVES	0.036036	0.329671	0.252961	0.33571	1.25648	306
REACTOME_DEFECTIVE_CHSY1_CAUSES_TPBS	0.17517	0.615792	0.135002	0.632945	1.25571	8
REACTOME_P75NTR_RECRUITS_SIGNALLING_COMPLEXES	0.183442	0.625708	0.128143	0.5658	1.25567	12
WP_NEURAL_CREST_DIFFERENTIATION	0.103774	0.507049	0.158514	0.381888	1.25558	91
REACTOME_AMINE_LIGAND_BINDING_RECEPTORS	0.195238	0.640618	0.122108	0.549106	1.2547	13
REACTOME_DERMATAN_SULFATE_BIOSYNTHESIS	0.187192	0.632861	0.127505	0.575845	1.2542	11
KEGG_ASCORBATE_AND_ALDARATE_METABOLISM	0.189744	0.635591	0.129443	0.650749	1.25225	7
REACTOME_NRIF_SIGNALS_CELL_DEATH_FROM_THE_NUCLEUS	0.180511	0.620147	0.128143	0.531066	1.25185	15
REACTOME_NETRIN_MEDIATED_REPULSION_SIGNALS	0.183673	0.625708	0.131458	0.630558	1.25098	8
REACTOME_CREATINE_METABOLISM	0.183673	0.625708	0.131458	0.630512	1.25088	8
REACTOME_CHREBP_ACTIVATES_METABOLIC_GENE_EXPRESSION	0.193162	0.638928	0.128143	0.649776	1.25038	7
SIG_BCR_SIGNALING_PATHWAY	0.141414	0.561107	0.138805	0.432774	1.24973	38
PID_ANGIOPOIETIN_RECEPTOR_PATHWAY	0.145985	0.572925	0.137251	0.424004	1.24953	43
REACTOME_RECEPTOR_TYPE_TYROSINE_PROTEIN_PHOSPHATASES	0.191083	0.636874	0.123842	0.510721	1.24903	18
REACTOME_G2_M_DNA_REPLICATION_CHECKPOINT	0.188581	0.635406	0.130777	0.706439	1.24896	5
KEGG_DRUG_METABOLISM_OTHER_ENZYMES	0.178019	0.61875	0.126876	0.484238	1.24851	22
REACTOME_RHOC_GTPASE_CYCLE	0.113855	0.513178	0.152145	0.389433	1.24819	71
BIOCARTA_NOTCH_PATHWAY	0.203735	0.652927	0.123842	0.667901	1.24788	6
KEGG_STARCH_AND_SUCROSE_METABOLISM	0.187017	0.632861	0.123257	0.478566	1.24694	23
KEGG_ARGININE_AND_PROLINE_METABOLISM	0.134588	0.55071	0.142901	0.415533	1.24672	47
BIOCARTA_TCRA_PATHWAY	0.180633	0.620147	0.1396	0.804923	1.24647	3
WP_STEROID_HORMONE_PRECURSOR_BIOSYNTHESIS	0.180633	0.620147	0.1396	0.80473	1.24617	3
REACTOME_ACTIVATION_OF_PPARGC1A_PGC_1ALPHA_BY_PHOSPHORYLATION	0.192751	0.638294	0.12564	0.603414	1.24586	9
REACTOME_SYNTHESIS_OF_12_EICOSATETRAENOIC_ACID_DERIVATIVES	0.180633	0.620147	0.1396	0.804146	1.24527	3
REACTOME_SYNTHESIS_OF_15_EICOSATETRAENOIC_ACID_DERIVATIVES	0.180633	0.620147	0.1396	0.804146	1.24527	3
REACTOME_BILE_ACID_AND_BILE_SALT_METABOLISM	0.159292	0.591456	0.131458	0.451962	1.24515	30
REACTOME_SIGNALING_BY_GPCR	0.0274725	0.291058	0.287857	0.328548	1.24423	368
WP_TYPE_II_INTERFERON_SIGNALING	0.191654	0.637399	0.121543	0.477426	1.24397	23
PID_HIF1_TFPATHWAY	0.141026	0.561009	0.138022	0.401604	1.24372	56
WP_ALTERNATIVE_PATHWAY_OF_FETAL_ANDROGEN_SYNTHESIS	0.210526	0.654947	0.121543	0.665469	1.24333	6
BIOCARTA_ERBB3_PATHWAY	0.193772	0.638928	0.128789	0.702813	1.24255	5
REACTOME_PLATELET_CALCIUM_HOMEOSTASIS	0.1875	0.632861	0.123842	0.492985	1.24046	20
REACTOME_GLUTATHIONE_CONJUGATION	0.18507	0.628382	0.124434	0.467246	1.24039	26
WP_COVID19_THROMBOSIS_AND_ANTICOAGULATION	0.177903	0.61875	0.141225	0.854724	1.23937	2
PID_WNT_CANONICAL_PATHWAY	0.189062	0.635591	0.123257	0.492501	1.23925	20
REACTOME_NONCANONICAL_ACTIVATION_OF_NOTCH3	0.192177	0.637865	0.128143	0.624048	1.23806	8
REACTOME_PASSIVE_TRANSPORT_BY_AQUAPORINS	0.193669	0.638928	0.134273	0.799217	1.23764	3
BIOCARTA_PROTEASOME_PATHWAY	0.19969	0.646008	0.118815	0.495748	1.23703	19
REACTOME_INTERACTION_WITH_CUMULUS_CELLS_AND_THE_ZONA_PELLUCIDA	0.195531	0.640618	0.133555	0.797721	1.23532	3
WP_BENZENE_METABOLISM	0.207447	0.654135	0.12564	0.737391	1.23531	4
REACTOME_SEROTONIN_RECEPTORS	0.187266	0.632861	0.137251	0.851824	1.23516	2
REACTOME_INTERFERON_SIGNALING	0.0970996	0.496448	0.158514	0.351674	1.2349	148
REACTOME_DRUG_ADME	0.146552	0.572925	0.135741	0.400961	1.23416	54
REACTOME_CDC42_GTPASE_CYCLE	0.0975919	0.496495	0.158514	0.351995	1.23386	147
BIOCARTA_D4GDI_PATHWAY	0.209226	0.654135	0.119888	0.597393	1.23343	9
WP_TYPE_I_INTERFERON_INDUCTION_AND_SIGNALING_DURING_SARSCOV2_INFECTION	0.192488	0.638109	0.122108	0.484294	1.23304	21
KEGG_RIG_I_LIKE_RECEPTOR_SIGNALING_PATHWAY	0.14963	0.575587	0.13649	0.418111	1.23287	44
WP_MICROGLIA_PATHOGEN_PHAGOCYTOSIS_PATHWAY	0.196875	0.643069	0.120433	0.489878	1.23265	20
WP_GLYCOGEN_SYNTHESIS_AND_DEGRADATION	0.165939	0.599719	0.127505	0.43028	1.2322	37
WP_T_CELL_RECEPTOR_AND_COSTIMULATORY_SIGNALING	0.201238	0.649652	0.118288	0.493782	1.23212	19
REACTOME_SYNTHESIS_OF_PYROPHOSPHATES_IN_THE_CYTOSOL	0.221311	0.666559	0.115734	0.574874	1.2312	10
REACTOME_SARS_COV_2_MODULATES_HOST_TRANSLATION_MACHINERY	0.152958	0.58282	0.132846	0.406891	1.23104	49
KEGG_ALPHA_LINOLENIC_ACID_METABOLISM	0.209226	0.654135	0.119888	0.596156	1.23087	9
WP_KALLMANN_SYNDROME	0.196875	0.643069	0.120433	0.488942	1.23029	20
REACTOME_SIGNALING_BY_PDGF	0.148415	0.573839	0.135002	0.399684	1.23028	55
KEGG_GLUTATHIONE_METABOLISM	0.155844	0.585201	0.131458	0.425944	1.23001	38
REACTOME_SCAVENGING_BY_CLASS_B_RECEPTORS	0.216263	0.660792	0.120985	0.694711	1.22823	5
KEGG_ALDOSTERONE_REGULATED_SODIUM_REABSORPTION	0.162757	0.594973	0.129443	0.439769	1.22736	32
WP_HEMATOPOIETIC_STEM_CELL_DIFFERENTIATION	0.168622	0.604247	0.126876	0.437409	1.22688	33
REACTOME_MRNA_EDITING_C_TO_U_CONVERSION	0.208566	0.654135	0.128789	0.792112	1.22664	3
WP_COVID19_AND_ENDOTHELIAL_CELL_SENESCENCE	0.208566	0.654135	0.128789	0.792093	1.22661	3
REACTOME_SENSORY_PROCESSING_OF_SOUND_BY_OUTER_HAIR_CELLS_OF_THE_COCHLEA	0.166423	0.600097	0.127505	0.420151	1.22639	40
WP_HFE_EFFECT_ON_HEPCIDIN_PRODUCTION	0.221631	0.666559	0.120985	0.731881	1.22608	4
REACTOME_REGULATION_OF_INSULIN_LIKE_GROWTH_FACTOR_IGF_TRANSPORT_AND_UPTAKE_BY_INSULIN_LIKE_GROWTH_FACTOR_BINDING_PROTEINS_IGFBPS	0.121131	0.527465	0.145516	0.374451	1.22597	85
WP_GLYOXYLATE_METABOLISM	0.220513	0.665858	0.118815	0.636967	1.22573	7
REACTOME_MISCELLANEOUS_SUBSTRATES	0.208566	0.654135	0.128789	0.791359	1.22547	3
REACTOME_SUMOYLATION_OF_IMMUNE_RESPONSE_PROTEINS	0.203612	0.652927	0.121543	0.562624	1.2254	11
REACTOME_METABOLISM_OF_ANGIOTENSINOGEN_TO_ANGIOTENSINS	0.220513	0.665858	0.118815	0.636379	1.2246	7
REACTOME_TIE2_SIGNALING	0.209779	0.654135	0.116739	0.508484	1.22405	16
REACTOME_OAS_ANTIVIRAL_RESPONSE	0.223183	0.668683	0.118815	0.691895	1.22325	5
BIOCARTA_IL2_PATHWAY	0.210777	0.655065	0.116739	0.504038	1.22257	17
BIOCARTA_CASPASE_PATHWAY	0.210191	0.654565	0.11725	0.499829	1.22239	18
REACTOME_THE_PHOTOTRANSDUCTION_CASCADE	0.207813	0.654135	0.116739	0.485686	1.2221	20
REACTOME_TERMINATION_OF_O_GLYCAN_BIOSYNTHESIS	0.211356	0.656205	0.116234	0.507424	1.2215	16
WP_IL1_AND_MEGAKARYOCYTES_IN_OBESITY	0.202593	0.650971	0.120985	0.528612	1.22111	14
BIOCARTA_IL17_PATHWAY	0.230104	0.6789	0.116739	0.690019	1.21993	5
REACTOME_STRIATED_MUSCLE_CONTRACTION	0.219474	0.665329	0.112379	0.468134	1.21976	23
REACTOME_ALPHA_PROTEIN_KINASE_1_SIGNALING_PATHWAY	0.215107	0.660177	0.117766	0.559783	1.21922	11
REACTOME_TBC_RABGAPS	0.172263	0.611146	0.125033	0.41339	1.21825	43
WP_PHOSPHOINOSITIDES_METABOLISM	0.164444	0.597152	0.129443	0.413146	1.21823	44
REACTOME_GLYCOGEN_BREAKDOWN_GLYCOGENOLYSIS	0.205835	0.654135	0.119888	0.526798	1.21692	14
REACTOME_MITOCHONDRIAL_UNCOUPLING	0.241135	0.685178	0.11524	0.726223	1.2166	4
REACTOME_THE_FATTY_ACID_CYCLING_MODEL	0.241135	0.685178	0.11524	0.726223	1.2166	4
REACTOME_KINESINS	0.162857	0.594973	0.127505	0.3969	1.21631	51
REACTOME_RELAXIN_RECEPTORS	0.187621	0.632861	0.1396	0.909973	1.21434	1
REACTOME_COLLAGEN_FORMATION	0.155007	0.5835	0.128143	0.378791	1.21408	71
REACTOME_KERATAN_SULFATE_KERATIN_METABOLISM	0.195231	0.640618	0.117766	0.443967	1.21366	29
WP_STRIATED_MUSCLE_CONTRACTION_PATHWAY	0.216174	0.660792	0.113787	0.457131	1.21353	26
KEGG_NITROGEN_METABOLISM	0.22187	0.666559	0.113313	0.499769	1.21222	17
REACTOME_G_ALPHA_Q_SIGNALLING_EVENTS	0.119845	0.526587	0.142901	0.355749	1.21203	115
WP_PROSTAGLANDIN_AND_LEUKOTRIENE_METABOLISM_IN_SENESCENCE	0.215625	0.660177	0.114267	0.481352	1.21119	20
REACTOME_NOREPINEPHRINE_NEUROTRANSMITTER_RELEASE_CYCLE	0.217252	0.66267	0.11524	0.51375	1.21103	15
REACTOME_PLATELET_HOMEOSTASIS	0.153955	0.583353	0.130777	0.382571	1.2107	66
REACTOME_DEFECTS_OF_CONTACT_ACTIVATION_SYSTEM_CAS_AND_KALLIKREIN_KININ_SYSTEM_KKS	0.219388	0.665329	0.118815	0.609826	1.20985	8
REACTOME_BIOTIN_TRANSPORT_AND_METABOLISM	0.228243	0.67726	0.113787	0.554725	1.2082	11
REACTOME_DDX58_IFIH1_MEDIATED_INDUCTION_OF_INTERFERON_ALPHA_BETA	0.159544	0.591456	0.128789	0.385423	1.20784	61
REACTOME_P75NTR_SIGNALS_VIA_NF_KB	0.21885	0.665329	0.114751	0.512318	1.20766	15
PID_INTEGRIN_A9B1_PATHWAY	0.224458	0.670547	0.111011	0.467969	1.20656	22
REACTOME_WAX_AND_PLASMALOGEN_BIOSYNTHESIS	0.249135	0.691344	0.111463	0.6823	1.20629	5
REACTOME_DISSOLUTION_OF_FIBRIN_CLOT	0.257377	0.704701	0.10592	0.563194	1.20618	10
REACTOME_ANTIGEN_ACTIVATES_B_CELL_RECEPTOR_BCR_LEADING_TO_GENERATION_OF_SECOND_MESSENGERS	0.224458	0.670547	0.111011	0.467655	1.20575	22
WP_GENES_CONTROLLING_NEPHROGENESIS	0.190684	0.636874	0.117766	0.420887	1.2053	37
BIOCARTA_RHODOPSIN_PATHWAY	0.226592	0.673657	0.123257	0.830756	1.20461	2
SA_TRKA_RECEPTOR	0.231861	0.680789	0.110122	0.500159	1.20401	16
WP_ARACHIDONATE_EPOXYGENASE_EPOXIDE_HYDROLASE	0.249135	0.691344	0.111463	0.680807	1.20365	5
REACTOME_ESTROGEN_BIOSYNTHESIS	0.258865	0.706267	0.110565	0.718053	1.20291	4
REACTOME_INTERLEUKIN_20_FAMILY_SIGNALING	0.222042	0.666559	0.114751	0.520122	1.2015	14
REACTOME_THE_CANONICAL_RETINOID_CYCLE_IN_RODS_TWILIGHT_VISION	0.236508	0.685178	0.10925	0.525742	1.20131	13
REACTOME_ACYL_CHAIN_REMODELLING_OF_PS	0.231527	0.680519	0.112843	0.551312	1.20077	11
REACTOME_O_LINKED_GLYCOSYLATION_OF_MUCINS	0.184094	0.626449	0.120985	0.405304	1.20058	45
KEGG_HYPERTROPHIC_CARDIOMYOPATHY_HCM	0.160563	0.592089	0.127505	0.379298	1.20025	65
BIOCARTA_BARR_MAPK_PATHWAY	0.238095	0.685178	0.10882	0.525244	1.20018	13
REACTOME_KETONE_BODY_METABOLISM	0.23888	0.685178	0.111011	0.581121	1.19983	9
KEGG_CALCIUM_SIGNALING_PATHWAY	0.130769	0.547711	0.135741	0.349315	1.19937	120
WP_ALPHA_6_BETA_4_SIGNALING_PATHWAY	0.195015	0.640618	0.116739	0.429656	1.19914	32
WP_COMPLEMENT_SYSTEM	0.189781	0.635591	0.118288	0.406828	1.19891	43
REACTOME_SENSORY_PERCEPTION_OF_SALTY_TASTE	0.230337	0.6789	0.122108	0.826446	1.19836	2
PID_HES_HEY_PATHWAY	0.189781	0.635591	0.118288	0.407574	1.19834	41
WP_PURINERGIC_SIGNALING	0.237718	0.685178	0.10882	0.493988	1.1982	17
KEGG_PRIMARY_IMMUNODEFICIENCY	0.230146	0.6789	0.112379	0.518638	1.19807	14
REACTOME_TRIGLYCERIDE_CATABOLISM	0.230032	0.6789	0.111463	0.507322	1.19588	15
WP_EPO_RECEPTOR_SIGNALING	0.238022	0.685178	0.10714	0.458857	1.19559	23
BIOCARTA_PTC1_PATHWAY	0.239737	0.685178	0.110565	0.548737	1.19516	11
KEGG_GLYCOSPHINGOLIPID_BIOSYNTHESIS_GANGLIO_SERIES	0.233227	0.6822	0.110565	0.506601	1.19418	15
REACTOME_VITAMIN_B2_RIBOFLAVIN_METABOLISM	0.262976	0.713064	0.107972	0.674592	1.19266	5
REACTOME_ROLE_OF_LAT2_NTAL_LAB_ON_CALCIUM_MOBILIZATION	0.247619	0.689744	0.106323	0.521606	1.19186	13
WP_COMPLEMENT_SYSTEM_IN_NEURONAL_DEVELOPMENT_AND_PLASTICITY	0.166667	0.600273	0.122679	0.371112	1.19182	73
REACTOME_DEPOSITION_OF_NEW_CENPA_CONTAINING_NUCLEOSOMES_AT_THE_CENTROMERE	0.217523	0.66267	0.111463	0.440623	1.19174	28
REACTOME_SENSORY_PERCEPTION	0.134518	0.55071	0.132846	0.340897	1.19145	144
WP_ELECTRON_TRANSPORT_CHAIN_OXPHOS_SYSTEM_IN_MITOCHONDRIA	0.17139	0.610156	0.119888	0.363624	1.18932	83
REACTOME_GAMMA_CARBOXYLATION_TRANSPORT_AND_AMINO_TERMINAL_CLEAVAGE_OF_PROTEINS	0.268166	0.720171	0.10673	0.672431	1.18884	5
REACTOME_CASPASE_ACTIVATION_VIA_DEPENDENCE_RECEPTORS_IN_THE_ABSENCE_OF_LIGAND	0.267213	0.720171	0.103576	0.555057	1.18875	10
REACTOME_NOTCH3_INTRACELLULAR_DOMAIN_REGULATES_TRANSCRIPTION	0.243077	0.686837	0.105521	0.452794	1.1887	24
KEGG_O_GLYCAN_BIOSYNTHESIS	0.242658	0.686837	0.10592	0.456108	1.18843	23
WP_EFFECT_OF_INTESTINAL_MICROBIOME_ON_ANTICOAGULANT_RESPONSE_OF_VITAMIN_K_ANTAGONISTS	0.268166	0.720171	0.10673	0.672093	1.18824	5
KEGG_NATURAL_KILLER_CELL_MEDIATED_CYTOTOXICITY	0.168033	0.603782	0.122108	0.369736	1.18741	73
REACTOME_ORGANIC_CATION_ANION_ZWITTERION_TRANSPORT	0.275042	0.726337	0.103958	0.635462	1.18727	6
REACTOME_ORGANIC_CATION_TRANSPORT	0.275042	0.726337	0.103958	0.635462	1.18727	6
BIOCARTA_CSK_PATHWAY	0.270492	0.722014	0.102822	0.55397	1.18643	10
WP_NICOTINE_METABOLISM_IN_LIVER_CELLS	0.226306	0.673456	0.12564	0.889058	1.18643	1
BIOCARTA_NO2IL12_PATHWAY	0.278438	0.731196	0.103197	0.63442	1.18532	6
BIOCARTA_PAR1_PATHWAY	0.251981	0.697359	0.105125	0.488276	1.18434	17
REACTOME_TANDEM_PORE_DOMAIN_POTASSIUM_CHANNELS	0.278438	0.731196	0.103197	0.633485	1.18357	6
REACTOME_NEGATIVE_FEEDBACK_REGULATION_OF_MAPK_PATHWAY	0.278438	0.731196	0.103197	0.633149	1.18295	6
REACTOME_ASSEMBLY_OF_ACTIVE_LPL_AND_LIPC_LIPASE_COMPLEXES	0.268534	0.720531	0.103576	0.572502	1.18203	9
REACTOME_METABOLISM_OF_CARBOHYDRATES	0.114716	0.514777	0.138022	0.319838	1.18104	252
REACTOME_KERATAN_SULFATE_DEGRADATION	0.27541	0.726337	0.101714	0.551043	1.18016	10
REACTOME_SENSORY_PROCESSING_OF_SOUND	0.206215	0.654135	0.110565	0.377967	1.17999	58
REACTOME_PLATELET_ACTIVATION_SIGNALING_AND_AGGREGATION	0.131643	0.547711	0.130777	0.326334	1.17988	203
REACTOME_INTERLEUKIN_2_FAMILY_SIGNALING	0.239502	0.685178	0.10714	0.44431	1.1795	26
REACTOME_GLYCOGEN_SYNTHESIS	0.272727	0.724871	0.101714	0.531165	1.17881	12
REACTOME_SIGNALING_BY_MEMBRANE_TETHERED_FUSIONS_OF_PDGFRA_OR_PDGFRB	0.281915	0.732355	0.105125	0.703386	1.17834	4
WP_GASTRIC_ACID_PRODUCTION	0.287234	0.734672	0.103958	0.702495	1.17685	4
REACTOME_G_ALPHA_S_SIGNALLING_EVENTS	0.179384	0.620147	0.116234	0.360478	1.1767	80
REACTOME_MET_INTERACTS_WITH_TNS_PROTEINS	0.27933	0.731605	0.10882	0.759797	1.17659	3
REACTOME_DEFECTS_IN_VITAMIN_AND_COFACTOR_METABOLISM	0.247678	0.689744	0.104733	0.47147	1.17645	19
REACTOME_RESPONSE_TO_ELEVATED_PLATELET_CYTOSOLIC_CA2	0.166003	0.599719	0.120985	0.352892	1.17534	100
REACTOME_REGULATION_OF_GLYCOLYSIS_BY_FRUCTOSE_2_6_BISPHOSPHATE_METABOLISM	0.281967	0.732355	0.100279	0.548683	1.1751	10
PID_IL23_PATHWAY	0.253943	0.700901	0.104344	0.488018	1.17478	16
BIOCARTA_DC_PATHWAY	0.243714	0.686837	0.120433	0.880178	1.17457	1
BIOCARTA_THELPER_PATHWAY	0.289007	0.735295	0.103576	0.700934	1.17423	4
BIOCARTA_NO1_PATHWAY	0.253846	0.700901	0.102822	0.447157	1.1739	24
REACTOME_INLA_MEDIATED_ENTRY_OF_LISTERIA_MONOCYTOGENES_INTO_HOST_CELLS	0.280066	0.731605	0.100991	0.568452	1.17367	9
KEGG_SNARE_INTERACTIONS_IN_VESICULAR_TRANSPORT	0.206745	0.654135	0.112843	0.411488	1.17199	36
WP_HOSTPATHOGEN_INTERACTION_OF_HUMAN_CORONAVIRUSES_INTERFERON_INDUCTION	0.23845	0.685178	0.104733	0.428395	1.1711	29
REACTOME_CREATION_OF_C4_AND_C2_ACTIVATORS	0.29078	0.735295	0.103197	0.698611	1.17034	4
WP_METABOLISM_OF_ALPHALINOLENIC_ACID	0.29078	0.735295	0.103197	0.69803	1.16937	4
REACTOME_CIPROFLOXACIN_ADME	0.279026	0.731495	0.10925	0.806231	1.16905	2
REACTOME_HEMOSTASIS	0.0928726	0.493422	0.149208	0.305533	1.1689	443
PID_TCR_PATHWAY	0.209841	0.654135	0.111011	0.38939	1.16829	47
WP_GLYCOLYSIS_IN_SENESCENCE	0.269294	0.720689	0.103197	0.536348	1.16818	11
REACTOME_GLUCURONIDATION	0.299145	0.746	0.0992333	0.606377	1.16686	7
REACTOME_LATE_SARS_COV_2_INFECTION_EVENTS	0.213277	0.65885	0.108394	0.368601	1.16649	66
REACTOME_GLYCEROPHOSPHOLIPID_BIOSYNTHESIS	0.176075	0.616864	0.117766	0.351608	1.16548	97
WP_RAS_AND_BRADYKININ_PATHWAYS_IN_COVID19	0.285714	0.734672	0.0988903	0.52515	1.16546	12
REACTOME_MET_ACTIVATES_PTK2_SIGNALING	0.255054	0.702083	0.103197	0.438827	1.16494	26
WP_HIF1A_AND_PPARG_REGULATION_OF_GLYCOLYSIS	0.299308	0.746	0.0999277	0.658885	1.16489	5
WP_CELL_DIFFERENTIATION_EXPANDED_INDEX	0.26183	0.711232	0.102449	0.483586	1.16411	16
REACTOME_INTERLEUKIN_18_SIGNALING	0.280899	0.731605	0.10882	0.802511	1.16366	2
WP_PREIMPLANTATION_EMBRYO	0.230216	0.6789	0.104733	0.39959	1.16273	39
KEGG_PROPANOATE_METABOLISM	0.256798	0.704366	0.100991	0.429241	1.16095	28
BIOCARTA_CHREBP_PATHWAY	0.257188	0.704701	0.104344	0.492457	1.16084	15
REACTOME_SYNTHESIS_OF_BILE_ACIDS_AND_BILE_SALTS_VIA_7ALPHA_HYDROXYCHOLESTEROL	0.264984	0.717249	0.101714	0.481106	1.15814	16
WP_HORMONAL_CONTROL_OF_PUBERTAL_GROWTH_SPURT	0.296089	0.741546	0.105125	0.747855	1.1581	3
WP_GANGLIO_SPHINGOLIPID_METABOLISM	0.288961	0.735295	0.0982123	0.521782	1.15798	12
WP_TRYPTOPHAN_METABOLISM	0.269171	0.720689	0.100279	0.454483	1.15714	21
KEGG_VASCULAR_SMOOTH_MUSCLE_CONTRACTION	0.20108	0.649652	0.10925	0.353907	1.15603	82
REACTOME_LTC4_CYSLTR_MEDIATED_IL4_PRODUCTION	0.292135	0.73677	0.106323	0.797149	1.15588	2
KEGG_ALZHEIMERS_DISEASE	0.186548	0.632704	0.110122	0.332102	1.15578	137
BIOCARTA_ACETAMINOPHEN_PATHWAY	0.292135	0.73677	0.106323	0.796915	1.15554	2
REACTOME_SPHINGOLIPID_DE_NOVO_BIOSYNTHESIS	0.232558	0.68089	0.104733	0.391555	1.15487	42
REACTOME_TICAM1_TRAF6_DEPENDENT_INDUCTION_OF_TAK1_COMPLEX	0.309836	0.756222	0.0946646	0.539028	1.15442	10
REACTOME_FORMATION_OF_THE_BETA_CATENIN_TCF_TRANSACTIVATING_COMPLEX	0.257824	0.705299	0.0999277	0.422265	1.15434	29
REACTOME_CLEC7A_INFLAMMASOME_PATHWAY	0.319149	0.764055	0.0975449	0.688918	1.1541	4
REACTOME_METABOLISM_OF_VITAMINS_AND_COFACTORS	0.168979	0.604363	0.116234	0.327331	1.15273	153
REACTOME_ASSEMBLY_OF_COLLAGEN_FIBRILS_AND_OTHER_MULTIMERIC_STRUCTURES	0.227941	0.677016	0.10673	0.387081	1.15222	46
BIOCARTA_NPP1_PATHWAY	0.304422	0.749626	0.0978773	0.580239	1.15115	8
PID_WNT_NONCANONICAL_PATHWAY	0.247788	0.689744	0.101714	0.416158	1.15087	31
REACTOME_MELANIN_BIOSYNTHESIS	0.268859	0.720689	0.113787	0.862359	1.1508	1
WP_NOVEL_INTRACELLULAR_COMPONENTS_OF_RIGILIKE_RECEPTOR_PATHWAY	0.231548	0.680519	0.104733	0.383497	1.1506	47
REACTOME_METABOLIC_DISORDERS_OF_BIOLOGICAL_OXIDATION_ENZYMES	0.273865	0.725991	0.0992333	0.451617	1.14985	21
REACTOME_PHASE_2_PLATEAU_PHASE	0.295567	0.741441	0.0975449	0.52658	1.1469	11
REACTOME_GLYCOGEN_METABOLISM	0.279753	0.731605	0.0972151	0.440141	1.14682	23
REACTOME_SIGNALING_BY_MET	0.215259	0.660177	0.105521	0.356217	1.14632	74
KEGG_ADIPOCYTOKINE_SIGNALING_PATHWAY	0.235632	0.685178	0.103197	0.372326	1.14602	54
KEGG_B_CELL_RECEPTOR_SIGNALING_PATHWAY	0.243553	0.686837	0.100991	0.3671	1.14561	60
REACTOME_NF_KB_IS_ACTIVATED_AND_SIGNALS_SURVIVAL	0.295455	0.741441	0.0968878	0.516137	1.14546	12
REACTOME_LYSOSOME_VESICLE_BIOGENESIS	0.238719	0.685178	0.103197	0.402997	1.14507	35
REACTOME_PROTON_COUPLED_MONOCARBOXYLATE_TRANSPORT	0.325976	0.767418	0.0937465	0.612872	1.14506	6
REACTOME_MULTIFUNCTIONAL_ANION_EXCHANGERS	0.327674	0.767418	0.0934449	0.612527	1.14442	6
KEGG_FOLATE_BIOSYNTHESIS	0.319728	0.764055	0.0949752	0.57669	1.14411	8
REACTOME_SIGNALING_BY_CSF3_G_CSF	0.267372	0.720171	0.09855	0.422985	1.14403	28
REACTOME_FREE_FATTY_ACIDS_REGULATE_INSULIN_SECRETION	0.319728	0.764055	0.0949752	0.576197	1.14313	8
REACTOME_SYNTHESIS_OF_BILE_ACIDS_AND_BILE_SALTS_VIA_24_HYDROXYCHOLESTEROL	0.322951	0.766903	0.0922597	0.53346	1.1425	10
REACTOME_HDL_CLEARANCE	0.338652	0.776257	0.0940503	0.681791	1.14217	4
WP_KININKALLIKREIN_PATHWAY	0.308989	0.755442	0.102822	0.787215	1.14148	2
WP_CLEAR_CELL_RENAL_CELL_CARCINOMA_PATHWAYS	0.22541	0.672088	0.102822	0.353507	1.1412	76
BIOCARTA_VITCB_PATHWAY	0.319605	0.764055	0.0931455	0.552437	1.14061	9
WP_AMINO_ACID_METABOLISM	0.243017	0.686837	0.0995791	0.35864	1.13997	68
PID_INTEGRIN2_PATHWAY	0.305195	0.750179	0.0949752	0.513625	1.13988	12
REACTOME_REMOVAL_OF_AMINOTERMINAL_PROPEPTIDES_FROM_GAMMA_CARBOXYLATED_PROTEINS	0.343972	0.779753	0.0931455	0.680203	1.1395	4
REACTOME_HDACS_DEACETYLATE_HISTONES	0.269795	0.720777	0.0962406	0.408253	1.13941	32
WP_EDA_SIGNALING_IN_HAIR_FOLLICLE_DEVELOPMENT	0.32623	0.767418	0.0916795	0.53143	1.13815	10
REACTOME_PHASE_1_INACTIVATION_OF_FAST_NA_CHANNELS	0.344652	0.78025	0.0905429	0.608426	1.13676	6
REACTOME_DAP12_INTERACTIONS	0.282844	0.733233	0.096563	0.436231	1.13663	23
REACTOME_DISEASES_ASSOCIATED_WITH_O_GLYCOSYLATION_OF_PROTEINS	0.245014	0.686837	0.100279	0.366918	1.1363	56
KEGG_T_CELL_RECEPTOR_SIGNALING_PATHWAY	0.234899	0.685178	0.0992333	0.347955	1.1358	81
REACTOME_RRNA_MODIFICATION_IN_THE_MITOCHONDRION	0.323129	0.766903	0.0943564	0.571963	1.13473	8
WP_SARS_CORONAVIRUS_AND_INNATE_IMMUNITY	0.285251	0.734672	0.0988903	0.491183	1.13465	14
REACTOME_SIALIC_ACID_METABOLISM	0.265487	0.717979	0.0975449	0.411776	1.13444	30
REACTOME_REGULATION_OF_IFNA_IFNB_SIGNALING	0.306818	0.752522	0.0946646	0.511156	1.1344	12
REACTOME_INTERLEUKIN_9_SIGNALING	0.34635	0.781124	0.0902635	0.60703	1.13415	6
REACTOME_OPSINS	0.295938	0.741546	0.107554	0.849273	1.13333	1
REACTOME_RUNX1_REGULATES_TRANSCRIPTION_OF_GENES_INVOLVED_IN_WNT_SIGNALING	0.351064	0.787619	0.0919686	0.6764	1.13313	4
REACTOME_ACYL_CHAIN_REMODELLING_OF_PE	0.286872	0.734672	0.09855	0.490338	1.1327	14
BIOCARTA_CDC25_PATHWAY	0.336079	0.77381	0.0902635	0.547301	1.13	9
WP_GPR40_PATHWAY	0.314286	0.758946	0.0919686	0.494449	1.12981	13
REACTOME_MITOTIC_TELOPHASE_CYTOKINESIS	0.314286	0.758946	0.0919686	0.494398	1.12969	13
WP_INITIATION_OF_TRANSCRIPTION_AND_TRANSLATION_ELONGATION_AT_THE_HIV1_LTR	0.274336	0.726337	0.0956031	0.408311	1.12917	31
REACTOME_CARGO_CONCENTRATION_IN_THE_ER	0.280967	0.731605	0.0956031	0.417468	1.12911	28
REACTOME_EXTRACELLULAR_MATRIX_ORGANIZATION	0.205251	0.654135	0.100279	0.309364	1.1264	217
REACTOME_PYRIMIDINE_CATABOLISM	0.351443	0.787619	0.0894367	0.602861	1.12636	6
WP_MODULATORS_OF_TCR_SIGNALING_AND_T_CELL_ACTIVATION	0.255882	0.703028	0.0995791	0.378061	1.12536	46
REACTOME_EICOSANOID_LIGAND_BINDING_RECEPTORS	0.356383	0.787619	0.0911073	0.671545	1.125	4
REACTOME_SARS_COV_1_INFECTION	0.222365	0.666879	0.0999277	0.325784	1.12494	130
WP_ESTROGEN_METABOLISM_WP5276	0.321429	0.764884	0.0919686	0.506466	1.12399	12
REACTOME_SYNTHESIS_OF_PG	0.354839	0.787619	0.0888945	0.601184	1.12322	6
PID_MAPK_TRK_PATHWAY	0.293255	0.738181	0.0913924	0.400442	1.12319	33
REACTOME_PROPIONYL_COA_CATABOLISM	0.358156	0.78987	0.0908241	0.670445	1.12316	4
REACTOME_SIGNALING_BY_ERYTHROPOIETIN	0.303406	0.748687	0.0925529	0.435618	1.12315	22
KEGG_TASTE_TRANSDUCTION	0.302034	0.748531	0.0934449	0.440932	1.12264	21
REACTOME_SYNTHESIS_OF_SUBSTRATES_IN_N_GLYCAN_BIOSYTHESIS	0.269774	0.720777	0.0940503	0.35917	1.12131	58
REACTOME_REDUCTION_OF_CYTOSOLIC_CA_LEVELS	0.333333	0.771467	0.0905429	0.514542	1.12068	11
REACTOME_ACYL_CHAIN_REMODELING_OF_CL	0.363322	0.792725	0.0886261	0.633707	1.12038	5
REACTOME_POTENTIAL_THERAPEUTICS_FOR_SARS	0.238223	0.685178	0.09855	0.342075	1.11997	85
BIOCARTA_MEF2D_PATHWAY	0.320127	0.764055	0.0908241	0.461621	1.11969	17
REACTOME_FICOLINS_BIND_TO_REPETITIVE_CARBOHYDRATE_STRUCTURES_ON_THE_TARGET_CELL_SURFACE	0.355805	0.787619	0.0943564	0.771634	1.11888	2
REACTOME_LECTIN_PATHWAY_OF_COMPLEMENT_ACTIVATION	0.355805	0.787619	0.0943564	0.771634	1.11888	2
WP_IL7_SIGNALING_PATHWAY	0.303599	0.748687	0.0931455	0.438877	1.11741	21
REACTOME_RUNX1_REGULATES_EXPRESSION_OF_COMPONENTS_OF_TIGHT_JUNCTIONS	0.365248	0.793681	0.0897105	0.666804	1.11706	4
REACTOME_TRANSCRIPTIONAL_REGULATION_BY_THE_AP_2_TFAP2_FAMILY_OF_TRANSCRIPTION_FACTORS	0.287611	0.734672	0.0928481	0.405293	1.11657	30
REACTOME_INTERLEUKIN_3_INTERLEUKIN_5_AND_GM_CSF_SIGNALING	0.27802	0.731196	0.0940503	0.392811	1.11613	35
WP_PURINE_METABOLISM	0.338259	0.775933	0.0897105	0.512301	1.1158	11
WP_CLOCKCONTROLLED_AUTOPHAGY_IN_BONE_METABOLISM	0.280726	0.731605	0.0911073	0.350699	1.11472	68
WP_ESTROGEN_METABOLISM_WP697	0.353741	0.787619	0.0891647	0.561438	1.11385	8
REACTOME_DEFECTIVE_FACTOR_VIII_CAUSES_HEMOPHILIA_A	0.377163	0.803388	0.08654	0.629609	1.11313	5
REACTOME_SYNTHESIS_OF_EPOXY_EET_AND_DIHYDROXYEICOSATRIENOIC_ACIDS_DHET	0.353818	0.787619	0.0943564	0.718209	1.11219	3
REACTOME_TRANS_GOLGI_NETWORK_VESICLE_BUDDING	0.276099	0.727532	0.0911073	0.346807	1.11172	72
REACTOME_DISEASES_ASSOCIATED_WITH_SURFACTANT_METABOLISM	0.353818	0.787619	0.0943564	0.717791	1.11154	3
REACTOME_KERATAN_SULFATE_BIOSYNTHESIS	0.299845	0.746	0.0931455	0.426572	1.11147	23
REACTOME_AZATHIOPRINE_ADME	0.320064	0.764055	0.0911073	0.454467	1.11145	18
REACTOME_FORMATION_OF_LATERAL_PLATE_MESODERM	0.363296	0.792725	0.0931455	0.766184	1.11098	2
BIOCARTA_CDC42RAC_PATHWAY	0.358844	0.78987	0.0883594	0.559963	1.11092	8
REACTOME_RRNA_PROCESSING_IN_THE_MITOCHONDRION	0.343186	0.779122	0.0888945	0.509953	1.11069	11
REACTOME_IRAK2_MEDIATED_ACTIVATION_OF_TAK1_COMPLEX	0.345902	0.780729	0.0883594	0.518579	1.11063	10
REACTOME_SARS_COV_2_ACTIVATES_MODULATES_INNATE_AND_ADAPTIVE_IMMUNE_RESPONSES	0.240964	0.685178	0.0975449	0.334616	1.11011	96
REACTOME_NITRIC_OXIDE_STIMULATES_GUANYLATE_CYCLASE	0.329635	0.768734	0.0891647	0.457554	1.10982	17
REACTOME_CYP2E1_REACTIONS	0.35568	0.787619	0.0940503	0.716615	1.10972	3
REACTOME_DISEASES_OF_GLYCOSYLATION	0.243902	0.686837	0.0943564	0.321913	1.10885	127
WP_IMMUNE_RESPONSE_TO_TUBERCULOSIS	0.296875	0.742308	0.0943564	0.44049	1.10837	20
WP_HEMESYNTHESIS_DEFECTS_AND_PORPHYRIAS	0.360544	0.790936	0.0880945	0.558528	1.10807	8
WP_HEME_BIOSYNTHESIS	0.360544	0.790936	0.0880945	0.558528	1.10807	8
WP_NAD_BIOSYNTHETIC_PATHWAYS	0.324841	0.767418	0.0902635	0.452607	1.1069	18
KEGG_SMALL_CELL_LUNG_CANCER	0.272973	0.724871	0.0908241	0.340777	1.10596	78
REACTOME_TFAP2_AP_2_FAMILY_REGULATES_TRANSCRIPTION_OF_GROWTH_FACTORS_AND_THEIR_RECEPTORS	0.354201	0.787619	0.0873098	0.535645	1.10594	9
REACTOME_SARS_COV_1_ACTIVATES_MODULATES_INNATE_IMMUNE_RESPONSES	0.324047	0.767418	0.0857844	0.394222	1.10574	33
WP_CALCIUM_REGULATION_IN_CARDIAC_CELLS	0.256082	0.703028	0.0913924	0.322567	1.10567	117
WP_GANGLIO_SERIES_SPHINGOLIPID_METABOLISM	0.347403	0.781879	0.0875697	0.498126	1.10548	12
WP_HAIR_FOLLICLE_DEVELOPMENT_CYTODIFFERENTIATION_PART_3_OF_3	0.29096	0.735295	0.0897105	0.35403	1.10526	58
REACTOME_PEPTIDE_HORMONE_BIOSYNTHESIS	0.361266	0.79104	0.0931455	0.713409	1.10476	3
WP_MATRIX_METALLOPROTEINASES	0.339683	0.776913	0.0875697	0.48323	1.10417	13
WP_MOLYBDENUM_COFACTOR_MOCO_BIOSYNTHESIS	0.385399	0.80983	0.0843144	0.590547	1.10335	6
REACTOME_AFLATOXIN_ACTIVATION_AND_DETOXIFICATION	0.355738	0.787619	0.086795	0.515134	1.10325	10
REACTOME_NPAS4_REGULATES_EXPRESSION_OF_TARGET_GENES	0.301563	0.747962	0.0934449	0.438389	1.10309	20
REACTOMEMATURATION_OF__SARS_COV_1_NUCLEOPROTEIN	0.353038	0.787619	0.0873098	0.506342	1.10282	11
SA_G2_AND_M_PHASES	0.365646	0.793681	0.0873098	0.555565	1.1022	8
REACTOME_SIGNALING_BY_RNF43_MUTANTS	0.365646	0.793681	0.0873098	0.555517	1.1021	8
WP_IL6_SIGNALING_PATHWAY	0.30303	0.748687	0.0886261	0.381553	1.10182	38
WP_INTRACELLULAR_TRAFFICKING_PROTEINS_INVOLVED_IN_CMT_NEUROPATHY	0.315708	0.760411	0.0905429	0.415023	1.10175	26
REACTOME_FATTY_ACIDS_BOUND_TO_GPR40_FFAR1_REGULATE_INSULIN_SECRETION	0.394464	0.811246	0.0840746	0.623042	1.10152	5
REACTOME_SIGNALING_BY_ALK	0.318885	0.764055	0.0897105	0.417628	1.10122	25
KEGG_LONG_TERM_DEPRESSION	0.283862	0.734672	0.0922597	0.357565	1.10063	55
REACTOME_SUMOYLATION_OF_TRANSCRIPTION_FACTORS	0.329618	0.768734	0.0894367	0.450041	1.10063	18
WP_MONOAMINE_GPCRS	0.356322	0.787619	0.086795	0.505141	1.10021	11
KEGG_AXON_GUIDANCE	0.251928	0.697359	0.0925529	0.320552	1.09967	123
BIOCARTA_MYOSIN_PATHWAY	0.359606	0.790404	0.0862866	0.504629	1.09909	11
REACTOME_ACETYLCHOLINE_NEUROTRANSMITTER_RELEASE_CYCLE	0.330632	0.770018	0.0902635	0.475759	1.09902	14
REACTOME_DEFECTIVE_CHST6_CAUSES_MCDC1	0.397924	0.811246	0.0835991	0.621536	1.09886	5
REACTOME_TNFS_BIND_THEIR_PHYSIOLOGICAL_RECEPTORS	0.350649	0.787365	0.0870516	0.494922	1.09837	12
REACTOME_PLASMA_LIPOPROTEIN_ASSEMBLY_REMODELING_AND_CLEARANCE	0.300287	0.746	0.0888945	0.356811	1.09826	54
BIOCARTA_BCR_PATHWAY	0.309735	0.756222	0.0886261	0.398391	1.09756	30
REACTOME_ASPIRIN_ADME	0.352381	0.787619	0.0855357	0.480066	1.09695	13
WP_FOCAL_ADHESION_PI3KAKTMTORSIGNALING_PATHWAY	0.250583	0.694736	0.0873098	0.297874	1.09661	244
WP_CARDIAC_PROGENITOR_DIFFERENTIATION	0.310044	0.756222	0.0878313	0.382789	1.0962	37
REACTOME_O_LINKED_GLYCOSYLATION	0.261808	0.711232	0.0931455	0.334	1.0958	89
REACTOME_EPHA_MEDIATED_GROWTH_CONE_COLLAPSE	0.318818	0.764055	0.0899861	0.412597	1.09531	26
REACTOME_MET_PROMOTES_CELL_MOTILITY	0.312317	0.756638	0.0878313	0.384444	1.09497	36
KEGG_SULFUR_METABOLISM	0.360791	0.790936	0.0862866	0.530327	1.09496	9
REACTOME_RELEASE_OF_HH_NP_FROM_THE_SECRETING_CELL	0.401384	0.811246	0.0831291	0.619218	1.09476	5
REACTOME_TLR3_MEDIATED_TICAM1_DEPENDENT_PROGRAMMED_CELL_DEATH	0.400709	0.811246	0.0845557	0.652908	1.09378	4
REACTOME_TRIF_MEDIATED_PROGRAMMED_CELL_DEATH	0.400709	0.811246	0.0845557	0.652908	1.09378	4
REACTOME_HIGHLY_SODIUM_PERMEABLE_POSTSYNAPTIC_ACETYLCHOLINE_NICOTINIC_RECEPTORS	0.403114	0.812089	0.0828962	0.61853	1.09354	5
REACTOME_POST_TRANSLATIONAL_MODIFICATION_SYNTHESIS_OF_GPI_ANCHORED_PROTEINS	0.302425	0.748687	0.0880945	0.35455	1.09274	53
WP_PEROXIREDOXIN_2_INDUCED_OVARIAN_FAILURE	0.398291	0.811246	0.0828962	0.567786	1.0926	7
REACTOME_RHO_GTPASE_CYCLE	0.232356	0.68089	0.0875697	0.286127	1.09205	421
REACTOME_PEPTIDE_HORMONE_METABOLISM	0.300144	0.746	0.0891647	0.360863	1.09179	49
REACTOME_RESOLUTION_OF_SISTER_CHROMATID_COHESION	0.267857	0.720171	0.0886261	0.317697	1.09156	119
REACTOME_METABOLISM_OF_STEROIDS	0.273308	0.725136	0.0875697	0.318283	1.09149	118
REACTOME_PHASE_0_RAPID_DEPOLARISATION	0.321534	0.764884	0.08654	0.394295	1.09041	31
REACTOME_PKA_MEDIATED_PHOSPHORYLATION_OF_KEY_METABOLIC_FACTORS	0.391061	0.810244	0.0886261	0.703974	1.09015	3
KEGG_HEMATOPOIETIC_CELL_LINEAGE	0.334311	0.771467	0.0840746	0.390419	1.08963	32
REACTOME_NA_CL_DEPENDENT_NEUROTRANSMITTER_TRANSPORTERS	0.398291	0.811246	0.0828962	0.565663	1.08852	7
WP_B_CELL_RECEPTOR_SIGNALING_PATHWAY	0.307383	0.752858	0.0838361	0.333395	1.08827	81
WP_INTERLEUKIN1_INDUCED_ACTIVATION_OF_NFKB	0.367381	0.795438	0.0852885	0.52618	1.08639	9
REACTOME_ACTIVATED_TAK1_MEDIATES_P38_MAPK_ACTIVATION	0.342105	0.779122	0.0857844	0.42131	1.08626	22
REACTOME_MODULATION_BY_MTB_OF_HOST_IMMUNE_SYSTEM	0.413495	0.81981	0.0815265	0.614211	1.08591	5
WP_PEPTIDE_GPCRS	0.327074	0.767418	0.0888945	0.426483	1.08585	21
REACTOME_PLASMA_LIPOPROTEIN_ASSEMBLY	0.35873	0.78987	0.0845557	0.475182	1.08578	13
BIOCARTA_STAT3_PATHWAY	0.380952	0.806646	0.0850427	0.547242	1.08568	8
WP_CYTOSOLIC_DNASENSING_PATHWAY	0.3125	0.756638	0.0873098	0.36767	1.08443	42
WP_PKCGAMMA_CALCIUM_SIGNALING_PATHWAY_IN_ATAXIA	0.33125	0.770078	0.0880945	0.43056	1.08339	20
REACTOME_REGULATION_OF_GENE_EXPRESSION_IN_ENDOCRINE_COMMITTED_NEUROG3_PROGENITOR_CELLS	0.391386	0.810371	0.0888945	0.747007	1.08317	2
WP_ASPIRIN_AND_MIRNAS	0.378689	0.803612	0.0833634	0.505095	1.08175	10
WP_GABA_METABOLISM_AKA_GHB	0.387755	0.80983	0.0840746	0.545224	1.08168	8
REACTOME_VISUAL_PHOTOTRANSDUCTION	0.316239	0.761097	0.0855357	0.345125	1.08155	61
REACTOME_SIGNALING_BY_NOTCH3	0.315108	0.75956	0.0862866	0.358033	1.08149	48
REACTOME_NOTCH2_ACTIVATION_AND_TRANSMISSION_OF_SIGNAL_TO_THE_NUCLEUS	0.343653	0.779605	0.0855357	0.419363	1.08124	22
WP_IL18_SIGNALING_PATHWAY	0.286402	0.734672	0.0817516	0.298527	1.08117	204
SIG_PIP3_SIGNALING_IN_B_LYMPHOCYTES	0.345921	0.780729	0.0838361	0.398842	1.07873	28
REACTOME_OTHER_INTERLEUKIN_SIGNALING	0.337461	0.775834	0.08654	0.4321	1.07821	19
WP_ID_SIGNALING_PATHWAY	0.351702	0.787619	0.086795	0.466613	1.07789	14
KEGG_LYSINE_DEGRADATION	0.325547	0.767418	0.0852885	0.365723	1.07778	43
REACTOME_BINDING_AND_UPTAKE_OF_LIGANDS_BY_SCAVENGER_RECEPTORS	0.343077	0.779122	0.0852885	0.410381	1.07735	24
WP_BIOSYNTHESIS_AND_TURNOVER_OF_1DEOXYSPHINGOID_BASES	0.394558	0.811246	0.0831291	0.542805	1.07688	8
REACTOME_DOWNSTREAM_SIGNAL_TRANSDUCTION	0.33383	0.771467	0.0850427	0.393622	1.07604	29
WP_INCLUSION_BODY_MYOSITIS	0.386885	0.80983	0.0822055	0.502422	1.07603	10
REACTOME_SIGNALING_BY_NOTCH1	0.327869	0.767418	0.0813027	0.334913	1.07557	73
REACTOME_INFLUENZA_INFECTION	0.296717	0.742308	0.0824344	0.305055	1.07442	151
WP_DISORDERS_OF_FRUCTOSE_METABOLISM	0.392092	0.810984	0.0817516	0.519685	1.07298	9
BIOCARTA_AGR_PATHWAY	0.342772	0.779122	0.0835991	0.392268	1.07234	29
REACTOME_POLB_DEPENDENT_LONG_PATCH_BASE_EXCISION_REPAIR	0.420513	0.822955	0.0799859	0.557094	1.07203	7
WP_LIPID_METABOLISM_IN_SENESCENT_CELLS	0.394089	0.811246	0.0813027	0.492185	1.07199	11
REACTOME_ERCC6_CSB_AND_EHMT2_G9A_POSITIVELY_REGULATE_RRNA_EXPRESSION	0.369085	0.7974	0.0826646	0.445083	1.07143	16
KEGG_LIMONENE_AND_PINENE_DEGRADATION	0.39374	0.811246	0.0815265	0.518906	1.07138	9
WP_TCA_CYCLE_AKA_KREBS_OR_CITRIC_ACID_CYCLE	0.35828	0.78987	0.0847985	0.437936	1.07102	18
WP_SOMATIC_SEX_DETERMINATION	0.419355	0.822955	0.0797706	0.573077	1.07071	6
REACTOME_NEGATIVE_REGULATION_OF_ACTIVITY_OF_TFAP2_AP_2_FAMILY_TRANSCRIPTION_FACTORS	0.403061	0.812089	0.0819779	0.539471	1.07027	8
REACTOME_REGULATION_OF_INNATE_IMMUNE_RESPONSES_TO_CYTOSOLIC_DNA	0.394089	0.811246	0.0813027	0.491023	1.06946	11
REACTOME_RHOBTB3_ATPASE_CYCLE	0.397035	0.811246	0.0810802	0.517544	1.06856	9
REACTOME_EICOSANOIDS	0.413858	0.820002	0.0857844	0.736859	1.06846	2
WP_TRYPTOPHAN_CATABOLISM_LEADING_TO_NAD_PRODUCTION	0.399015	0.811246	0.0806388	0.490555	1.06844	11
WP_COHESIN_COMPLEX_CORNELIA_DE_LANGE_SYNDROME	0.387097	0.80983	0.0762797	0.37996	1.06574	33
REACTOME_VLDL_ASSEMBLY	0.434397	0.836134	0.0802023	0.63603	1.0655	4
REACTOME_ERYTHROCYTES_TAKE_UP_OXYGEN_AND_RELEASE_CARBON_DIOXIDE	0.421348	0.822955	0.0847985	0.734207	1.06461	2
BIOCARTA_SRCRPTP_PATHWAY	0.402299	0.812089	0.0802023	0.488794	1.0646	11
BIOCARTA_ETC_PATHWAY	0.400329	0.811246	0.0806388	0.515032	1.06338	9
WP_FATTY_ACID_BIOSYNTHESIS	0.342187	0.779122	0.0862866	0.422462	1.06301	20
REACTOME_GOLGI_CISTERNAE_PERICENTRIOLAR_STACK_REORGANIZATION	0.377634	0.803388	0.0828962	0.459887	1.06235	14
REACTOME_NOTCH1_INTRACELLULAR_DOMAIN_REGULATES_TRANSCRIPTION	0.345876	0.780729	0.0815265	0.353862	1.06169	47
REACTOME_ACROSOME_REACTION_AND_SPERM_OOCYTE_MEMBRANE_BINDING	0.423221	0.823731	0.0845557	0.732053	1.06149	2
REACTOME_EPH_EPHRIN_MEDIATED_REPULSION_OF_CELLS	0.345876	0.780729	0.0815265	0.353783	1.06145	47
WP_BIOSYNTHESIS_AND_REGENERATION_OF_TETRAHYDROBIOPTERIN_AND_CATABOLISM_OF_PHENYLALANINE	0.435897	0.836134	0.0780892	0.551266	1.06081	7
REACTOME_SIGNALING_BY_LRP5_MUTANTS	0.437943	0.837816	0.0797706	0.632943	1.06033	4
REACTOME_SIGNALING_BY_RHO_GTPASES_MIRO_GTPASES_AND_RHOBTB3	0.284055	0.734672	0.0753094	0.273742	1.05992	615
WP_ONECARBON_METABOLISM	0.356164	0.787619	0.0826646	0.39512	1.0596	27
WP_TGIF_DISRUPTION_OF_SHH_SIGNALING	0.439316	0.839165	0.0776799	0.55047	1.05928	7
WP_DISRUPTION_OF_POSTSYNAPTIC_SIGNALING_BY_CNV	0.371681	0.797836	0.0787114	0.382919	1.05895	31
REACTOME_SARS_COV_1_HOST_INTERACTIONS	0.347297	0.781879	0.0776799	0.323303	1.05826	86
WP_MYD88_DISTINCT_INPUTOUTPUT_PATHWAY	0.403279	0.812089	0.0799859	0.494014	1.05802	10
REACTOME_SARS_COV_INFECTIONS	0.320442	0.764055	0.0714786	0.280043	1.058	361
REACTOME_CELLULAR_HEXOSE_TRANSPORT	0.384127	0.80983	0.0808589	0.462912	1.05775	13
WP_SEROTONIN_AND_ANXIETY	0.410509	0.816516	0.0791317	0.485559	1.05756	11
PID_VEGFR1_2_PATHWAY	0.358939	0.78987	0.0776799	0.332453	1.05673	68
REACTOME_PROTEIN_LOCALIZATION	0.344697	0.78025	0.0745501	0.300203	1.05518	149
REACTOME_INTERLEUKIN_21_SIGNALING	0.442735	0.841512	0.0772747	0.548321	1.05515	7
KEGG_DILATED_CARDIOMYOPATHY	0.368999	0.7974	0.0753094	0.329188	1.05509	71
PID_BCR_5PATHWAY	0.350575	0.787365	0.08042	0.342683	1.05478	54
REACTOME_ELEVATION_OF_CYTOSOLIC_CA2_LEVELS	0.418451	0.822821	0.0782955	0.51075	1.05454	9
BIOCARTA_PLATELETAPP_PATHWAY	0.413115	0.819584	0.0787114	0.492303	1.05436	10
REACTOME_NEUROTRANSMITTER_RELEASE_CYCLE	0.343066	0.779122	0.0824344	0.358184	1.05312	41
BIOCARTA_WNT_LRP6_PATHWAY	0.450355	0.843818	0.0782955	0.628574	1.05301	4
KEGG_OXIDATIVE_PHOSPHORYLATION	0.338139	0.775933	0.0774768	0.313689	1.05162	103
REACTOME_TRANSPORT_OF_INORGANIC_CATIONS_ANIONS_AND_AMINO_ACIDS_OLIGOPEPTIDES	0.363265	0.792725	0.0756946	0.325116	1.05148	77
REACTOME_SIGNALING_BY_NOTCH1_PEST_DOMAIN_MUTANTS_IN_CANCER	0.365819	0.793681	0.0772747	0.336657	1.05103	58
BIOCARTA_PLC_PATHWAY	0.447863	0.843471	0.0766747	0.545815	1.05032	7
REACTOME_NEGATIVE_REGULATION_OF_MAPK_PATHWAY	0.347445	0.781879	0.0817516	0.357011	1.04967	41
WP_MESODERMAL_COMMITMENT_PATHWAY	0.343188	0.779122	0.0756946	0.303519	1.04936	132
REACTOME_DISEASES_OF_CARBOHYDRATE_METABOLISM	0.371385	0.797836	0.08042	0.391184	1.04905	27
REACTOME_TRANSCRIPTIONAL_REGULATION_OF_TESTIS_DIFFERENTIATION	0.449827	0.843818	0.0770737	0.59324	1.04883	5
KEGG_MATURITY_ONSET_DIABETES_OF_THE_YOUNG	0.423645	0.824037	0.0774768	0.481502	1.04872	11
REACTOME_RESOLUTION_OF_D_LOOP_STRUCTURES_THROUGH_SYNTHESIS_DEPENDENT_STRAND_ANNEALING_SDSA	0.374429	0.800531	0.0799859	0.390933	1.04838	27
REACTOME_SYNTHESIS_OF_BILE_ACIDS_AND_BILE_SALTS	0.407121	0.815035	0.0764767	0.397365	1.04779	25
REACTOME_NRAGE_SIGNALS_DEATH_THROUGH_JNK	0.371758	0.797836	0.0774768	0.34035	1.04764	55
REACTOME_REVERSIBLE_HYDRATION_OF_CARBON_DIOXIDE	0.452991	0.845895	0.0760837	0.543779	1.04641	7
PID_EPHA2_FWD_PATHWAY	0.383901	0.80983	0.0795565	0.419144	1.04588	19
WP_NRF2_PATHWAY	0.35743	0.789367	0.0756946	0.315038	1.04516	96
REACTOME_REGULATION_OF_TP53_EXPRESSION_AND_DEGRADATION	0.390029	0.81	0.0758887	0.366772	1.04463	36
BIOCARTA_SPPA_PATHWAY	0.408946	0.816187	0.077884	0.442813	1.04382	15
REACTOME_INTERLEUKIN_RECEPTOR_SHC_SIGNALING	0.399366	0.811246	0.0787114	0.429913	1.04278	17
REACTOME_PROTEIN_PROTEIN_INTERACTIONS_AT_SYNAPSES	0.38822	0.80983	0.0714786	0.31926	1.04215	80
REACTOME_LGI_ADAM_INTERACTIONS	0.441708	0.841127	0.0753094	0.47832	1.04179	11
PID_DELTA_NP63_PATHWAY	0.382734	0.809306	0.0758887	0.357717	1.04088	39
WP_SOMITOGENESIS_IN_THE_CONTEXT_OF_SPONDYLOCOSTAL_DYSOSTOSIS	0.444822	0.841857	0.0766747	0.557064	1.04079	6
REACTOME_FLT3_SIGNALING_THROUGH_SRC_FAMILY_KINASES	0.495345	0.872157	0.0758887	0.67198	1.0406	3
REACTOME_METABOLISM_OF_NUCLEOTIDES	0.387314	0.80983	0.0720033	0.318496	1.04036	82
REACTOME_P75_NTR_RECEPTOR_MEDIATED_SIGNALLING	0.367072	0.795438	0.0747385	0.315743	1.03941	92
REACTOME_CELL_DEATH_SIGNALLING_VIA_NRAGE_NRIF_AND_NADE	0.388736	0.81	0.0727141	0.324208	1.03927	72
WP_NICOTINE_EFFECT_ON_DOPAMINERGIC_NEURONS	0.402536	0.812089	0.0782955	0.428287	1.03883	17
WP_ACUTE_VIRAL_MYOCARDITIS	0.389685	0.81	0.0747385	0.332852	1.03873	60
REACTOME_ANTI_INFLAMMATORY_RESPONSE_FAVOURING_LEISHMANIA_PARASITE_INFECTION	0.376404	0.803388	0.0755015	0.333121	1.03819	57
REACTOME_COLLAGEN_BIOSYNTHESIS_AND_MODIFYING_ENZYMES	0.39049	0.81	0.0749279	0.337231	1.03804	55
WP_MONOAMINE_TRANSPORT	0.38949	0.81	0.0787114	0.398379	1.03801	23
KEGG_INOSITOL_PHOSPHATE_METABOLISM	0.385281	0.80983	0.0756946	0.342891	1.03741	49
BIOCARTA_IL22BP_PATHWAY	0.444811	0.841857	0.0751182	0.502325	1.03714	9
REACTOME_REGULATION_OF_EXPRESSION_OF_SLITS_AND_ROBOS	0.361917	0.79134	0.0720033	0.292598	1.03684	163
REACTOME_SIGNALING_BY_NOTCH2	0.40708	0.815035	0.0739901	0.374523	1.03573	31
REACTOME_CD163_MEDIATING_AN_ANTI_INFLAMMATORY_RESPONSE	0.461538	0.854608	0.0751182	0.538129	1.03553	7
PID_CD8_TCR_PATHWAY	0.392496	0.811036	0.0747385	0.358506	1.03526	38
PID_IL8_CXCR1_PATHWAY	0.396875	0.811246	0.0782955	0.411258	1.03482	20
REACTOME_EGR2_AND_SOX10_MEDIATED_INITIATION_OF_SCHWANN_CELL_MYELINATION	0.40902	0.816187	0.0764767	0.389655	1.03441	26
KEGG_ECM_RECEPTOR_INTERACTION	0.401107	0.811246	0.0714786	0.323374	1.0338	70
WP_PI3KAKT_SIGNALING_PATHWAY	0.376879	0.803388	0.0656814	0.279566	1.03327	254
BIOCARTA_ASBCELL_PATHWAY	0.458801	0.852871	0.0802023	0.712329	1.03289	2
BIOCARTA_BBCELL_PATHWAY	0.458801	0.852871	0.0802023	0.712329	1.03289	2
REACTOME_PEXOPHAGY	0.449918	0.843818	0.0743625	0.473996	1.03237	11
BIOCARTA_TPO_PATHWAY	0.407121	0.815035	0.0764767	0.399876	1.031	22
BIOCARTA_HES_PATHWAY	0.445902	0.842617	0.0747385	0.481115	1.03039	10
WP_RETT_SYNDROME_CAUSING_GENES	0.4	0.811246	0.0747385	0.346046	1.03007	46
PID_CDC42_REG_PATHWAY	0.397914	0.811246	0.0756946	0.376709	1.0298	29
REACTOME_NCAM_SIGNALING_FOR_NEURITE_OUT_GROWTH	0.393258	0.811246	0.0732559	0.33035	1.02955	57
WP_GLUTATHIONE_METABOLISM	0.415873	0.821882	0.0766747	0.450541	1.02948	13
BIOCARTA_FXR_PATHWAY	0.484043	0.863265	0.0745501	0.613919	1.02846	4
REACTOME_COSTIMULATION_BY_THE_CD28_FAMILY	0.399116	0.811246	0.0749279	0.347145	1.0283	45
WP_TYPE_III_INTERFERON_SIGNALING	0.468376	0.857712	0.0743625	0.534338	1.02824	7
REACTOME_STING_MEDIATED_INDUCTION_OF_HOST_IMMUNE_RESPONSES	0.441558	0.841127	0.0747385	0.462942	1.0274	12
REACTOME_ARACHIDONATE_PRODUCTION_FROM_DAG	0.468858	0.857712	0.0749279	0.580194	1.02577	5
WP_NEPHROTIC_SYNDROME	0.422125	0.823157	0.0714786	0.360929	1.02554	35
WP_OVERVIEW_OF_INTERFERONSMEDIATED_SIGNALING_PATHWAY	0.436102	0.836134	0.0745501	0.434343	1.02385	15
BIOCARTA_FEEDER_PATHWAY	0.472789	0.860162	0.0736213	0.515901	1.02351	8
KEGG_ARRHYTHMOGENIC_RIGHT_VENTRICULAR_CARDIOMYOPATHY_ARVC	0.426346	0.826681	0.0696133	0.325227	1.0235	63
WP_ARRHYTHMOGENIC_RIGHT_VENTRICULAR_CARDIOMYOPATHY	0.426346	0.826681	0.0696133	0.325227	1.0235	63
BIOCARTA_BLYMPHOCYTE_PATHWAY	0.466151	0.857712	0.0810802	0.766782	1.02325	1
WP_AUTOPHAGY	0.406855	0.815035	0.0745501	0.374243	1.02306	29
WP_UREA_CYCLE_AND_ASSOCIATED_PATHWAYS	0.417957	0.822821	0.0751182	0.396766	1.02298	22
BIOCARTA_TCAPOPTOSIS_PATHWAY	0.521415	0.882349	0.0732559	0.659925	1.02193	3
WP_DOPAMINERGIC_NEUROGENESIS	0.423077	0.823731	0.0741759	0.389191	1.02173	24
REACTOME_FIBRONECTIN_MATRIX_FORMATION	0.523277	0.884465	0.0730744	0.658956	1.02043	3
REACTOME_HS_GAG_DEGRADATION	0.41875	0.822821	0.0755015	0.404564	1.01798	20
WP_FOCAL_ADHESION	0.4178	0.822821	0.0639272	0.285019	1.01724	172
KEGG_INSULIN_SIGNALING_PATHWAY	0.396684	0.811246	0.0679923	0.295927	1.01676	119
REACTOME_COPII_MEDIATED_VESICLE_TRANSPORT	0.443662	0.841512	0.0673624	0.321796	1.01634	64
PID_FOXM1_PATHWAY	0.447214	0.842763	0.0689567	0.356493	1.01536	36
REACTOME_MITOTIC_SPINDLE_CHECKPOINT	0.416559	0.822397	0.0662842	0.299615	1.01529	110
REACTOME_COPI_DEPENDENT_GOLGI_TO_ER_RETROGRADE_TRAFFIC	0.408907	0.816187	0.0692836	0.309265	1.01465	89
REACTOME_LIPOPHAGY	0.481293	0.863191	0.0727141	0.511338	1.01445	8
REACTOME_GERM_LAYER_FORMATION_AT_GASTRULATION	0.47619	0.860162	0.0714786	0.465607	1.0141	11
REACTOME_ELASTIC_FIBRE_FORMATION	0.418705	0.822821	0.0713053	0.348435	1.01388	39
REACTOME_SIGNALING_BY_NODAL	0.43436	0.836134	0.0755015	0.438886	1.01384	14
REACTOME_INOSITOL_PHOSPHATE_METABOLISM	0.414815	0.820843	0.0732559	0.343565	1.01306	44
REACTOME_SYNTHESIS_OF_PIPS_AT_THE_EARLY_ENDOSOME_MEMBRANE	0.435331	0.836134	0.0739901	0.420801	1.01298	16
REACTOME_RAC1_GTPASE_CYCLE	0.428395	0.828571	0.0626618	0.283585	1.0123	170
WP_IL4_SIGNALING_PATHWAY	0.450785	0.843818	0.0672065	0.331587	1.01066	50
WP_GLUCURONIDATION	0.493197	0.869707	0.0714786	0.508651	1.00912	8
WP_SARSCOV2_MITOCHONDRIAL_CHRONIC_OXIDATIVE_STRESS_AND_ENDOTHELIAL_DYSFUNCTION	0.44374	0.841512	0.0732559	0.41603	1.0091	17
REACTOME_SYNTHESIS_OF_ACTIVE_UBIQUITIN_ROLES_OF_E1_AND_E2_ENZYMES	0.452802	0.845895	0.0686326	0.366092	1.00858	30
WP_GPCRS_CLASS_B_SECRETINLIKE	0.482759	0.863265	0.0707899	0.462888	1.00818	11
WP_NAD_METABOLISM	0.440843	0.840518	0.0747385	0.436309	1.00789	14
KEGG_PORPHYRIN_AND_CHLOROPHYLL_METABOLISM	0.460094	0.852958	0.0707899	0.395661	1.00738	21
WP_MBDNF_AND_PROBDNF_REGULATION_OF_GABA_NEUROTRANSMISSION	0.452802	0.845895	0.0686326	0.365634	1.00731	30
WP_CELL_DIFFERENTIATION_INDEX	0.478689	0.860523	0.0711327	0.470299	1.00723	10
KEGG_SPHINGOLIPID_METABOLISM	0.454545	0.848283	0.0673624	0.354932	1.00676	34
WP_MEVALONATE_PATHWAY	0.499145	0.87635	0.0711327	0.522747	1.00593	7
WP_VITAMIN_D_METABOLISM	0.491349	0.868075	0.0725352	0.568934	1.00586	5
WP_CANCER_IMMUNOTHERAPY_BY_PD1_BLOCKADE	0.478689	0.860523	0.0711327	0.469568	1.00566	10
KEGG_PHOSPHATIDYLINOSITOL_SIGNALING_SYSTEM	0.444134	0.841589	0.0668966	0.316247	1.00522	68
REACTOME_CGMP_EFFECTS	0.463492	0.855656	0.0711327	0.439784	1.0049	13
WP_AFLATOXIN_B1_METABOLISM	0.540037	0.894028	0.0714786	0.648655	1.00448	3
REACTOME_BICARBONATE_TRANSPORTERS	0.501701	0.878384	0.0706196	0.506071	1.004	8
REACTOME_ROS_AND_RNS_PRODUCTION_IN_PHAGOCYTES	0.464396	0.856813	0.0697793	0.380553	1.00346	25
BIOCARTA_TCYTOTOXIC_PATHWAY	0.541899	0.894028	0.0713053	0.647853	1.00324	3
KEGG_FC_GAMMA_R_MEDIATED_PHAGOCYTOSIS	0.44698	0.842763	0.0646485	0.307097	1.00243	81
WP_RANKLRANK_SIGNALING_PATHWAY	0.449422	0.843818	0.0679923	0.326673	1.00202	52
REACTOME_THE_NLRP3_INFLAMMASOME	0.490969	0.867922	0.0699459	0.459709	1.00125	11
REACTOME_SARS_COV_2_INFECTION	0.45977	0.852871	0.0559429	0.270285	1.00101	260
REACTOME_ACTIVATION_OF_THE_MRNA_UPON_BINDING_OF_THE_CAP_BINDING_COMPLEX_AND_EIFS_AND_SUBSEQUENT_BINDING_TO_43S	0.450565	0.843818	0.0667426	0.320458	1.00045	58
WP_FAMILIAL_HYPERLIPIDEMIA_TYPE_3	0.495895	0.872512	0.0694481	0.459272	1.0003	11
KEGG_STEROID_HORMONE_BIOSYNTHESIS	0.459588	0.852871	0.0714786	0.412199	0.999811	17
REACTOME_STAT5_ACTIVATION_DOWNSTREAM_OF_FLT3_ITD_MUTANTS	0.483607	0.863265	0.0706196	0.466713	0.99955	10
WP_STATIN_INHIBITION_OF_CHOLESTEROL_PRODUCTION	0.459375	0.852871	0.0707899	0.397113	0.999227	20
WP_STING_PATHWAY_IN_KAWASAKILIKE_DISEASE_AND_COVID19	0.458466	0.852871	0.0720033	0.423867	0.999155	15
REACTOME_TRAFFICKING_OF_MYRISTOYLATED_PROTEINS_TO_THE_CILIUM	0.50173	0.878384	0.0714786	0.564922	0.998765	5
KEGG_LEUKOCYTE_TRANSENDOTHELIAL_MIGRATION	0.457718	0.852871	0.0635008	0.304262	0.997603	87
WP_NEUROTRANSMITTER_DISORDERS	0.509402	0.880468	0.0701132	0.51835	0.997473	7
REACTOME_RUNX1_REGULATES_TRANSCRIPTION_OF_GENES_INVOLVED_IN_BCR_SIGNALING	0.50346	0.878883	0.0713053	0.5639	0.996958	5
REACTOME_RAC3_GTPASE_CYCLE	0.464865	0.856832	0.063079	0.304988	0.996837	84
PID_INTEGRIN3_PATHWAY	0.47016	0.858202	0.0661326	0.350725	0.996548	35
REACTOME_ADAPTIVE_IMMUNE_SYSTEM	0.493644	0.869707	0.0488971	0.258001	0.995835	580
PID_IL4_2PATHWAY	0.446043	0.842617	0.0681513	0.341923	0.994927	39
WP_NOTCH_SIGNALING	0.446715	0.842763	0.0687943	0.337466	0.994503	43
WP_SEROTONIN_TRANSPORTER_ACTIVITY	0.508503	0.880468	0.0699459	0.501164	0.994269	8
REACTOME_COLLAGEN_DEGRADATION	0.467647	0.857712	0.0668966	0.333998	0.994202	46
REACTOME_TRANSFERRIN_ENDOCYTOSIS_AND_RECYCLING	0.47793	0.860162	0.0675189	0.370296	0.993033	27
REACTOME_LIPID_PARTICLE_ORGANIZATION	0.533708	0.892492	0.0723571	0.684564	0.992631	2
REACTOME_FASL_CD95L_SIGNALING	0.515957	0.88223	0.0713053	0.591688	0.991221	4
REACTOME_NEPHRIN_FAMILY_INTERACTIONS	0.467187	0.857712	0.0699459	0.393807	0.99091	20
REACTOME_VESICLE_MEDIATED_TRANSPORT	0.511628	0.881275	0.0471642	0.256278	0.990801	596
PID_HIF1A_PATHWAY	0.474522	0.860162	0.0701132	0.405116	0.990757	18
REACTOME_NUCLEOTIDE_CATABOLISM	0.47678	0.860162	0.0684715	0.375543	0.990253	25
BIOCARTA_AHSP_PATHWAY	0.51453	0.881275	0.0696133	0.514566	0.990191	7
PID_TNF_PATHWAY	0.459259	0.852871	0.0681513	0.335773	0.990083	44
WP_ETHANOL_EFFECTS_ON_HISTONE_MODIFICATIONS	0.47678	0.860162	0.0684715	0.375455	0.990019	25
KEGG_MELANOMA	0.484195	0.863265	0.0640704	0.321352	0.989123	54
REACTOME_ANTIVIRAL_MECHANISM_BY_IFN_STIMULATED_GENES	0.468665	0.857712	0.063079	0.307212	0.988623	74
REACTOME_MOLYBDENUM_COFACTOR_BIOSYNTHESIS	0.512733	0.881275	0.0694481	0.529084	0.988516	6
KEGG_GLYCEROPHOSPHOLIPID_METABOLISM	0.485755	0.863465	0.0635008	0.315348	0.988235	61
REACTOME_UREA_CYCLE	0.517949	0.88223	0.0692836	0.513417	0.987979	7
REACTOME_DAP12_SIGNALING	0.482003	0.863265	0.0684715	0.387966	0.987786	21
REACTOME_DNA_DAMAGE_REVERSAL	0.52381	0.884606	0.0684715	0.497769	0.987533	8
REACTOME_SIGNALING_BY_NOTCH	0.488228	0.865672	0.0566484	0.276891	0.987282	171
REACTOME_RESPIRATORY_ELECTRON_TRANSPORT_ATP_SYNTHESIS_BY_CHEMIOSMOTIC_COUPLING_AND_HEAT_PRODUCTION_BY_UNCOUPLING_PROTEINS	0.467012	0.857712	0.0607719	0.291406	0.986982	109
REACTOME_MECP2_REGULATES_TRANSCRIPTION_OF_NEURONAL_LIGANDS	0.517949	0.88223	0.0692836	0.512871	0.986929	7
PID_ARF_3PATHWAY	0.47678	0.860162	0.0684715	0.395306	0.9864	19
BIOCARTA_CTLA4_PATHWAY	0.514431	0.881275	0.0692836	0.527806	0.986129	6
PID_S1P_S1P1_PATHWAY	0.47678	0.860162	0.0684715	0.39518	0.986084	19
WP_BLOOD_CLOTTING_CASCADE	0.510708	0.881275	0.0681513	0.476876	0.984597	9
WP_INTERACTIONS_OF_NATURAL_KILLER_CELLS_IN_PANCREATIC_CANCER	0.513957	0.881275	0.067676	0.451931	0.984314	11
REACTOME_SUMO_IS_PROTEOLYTICALLY_PROCESSED	0.519525	0.882349	0.0687943	0.526396	0.983495	6
REACTOME_RUNX1_REGULATES_ESTROGEN_RECEPTOR_MEDIATED_TRANSCRIPTION	0.519031	0.882349	0.0697793	0.556213	0.983369	5
WP_LDL_INFLUENCE_ON_CD14_AND_TLR4	0.482484	0.863265	0.0692836	0.402073	0.983316	18
KEGG_LINOLEIC_ACID_METABOLISM	0.512356	0.881275	0.0679923	0.476153	0.983104	9
WP_NANOMATERIALINDUCED_INFLAMMASOME_ACTIVATION	0.550562	0.895716	0.0707899	0.677848	0.982893	2
WP_CELLTYPE_DEPENDENT_SELECTIVITY_OF_CCK2R_SIGNALING	0.506494	0.880468	0.0678338	0.442732	0.982549	12
REACTOME_TAK1_DEPENDENT_IKK_AND_NF_KAPPA_B_ACTIVATION	0.477698	0.860162	0.0647943	0.337568	0.982255	39
REACTOME_PECAM1_INTERACTIONS	0.514003	0.881275	0.0678338	0.475549	0.981856	9
REACTOME_TFAP2_AP_2_FAMILY_REGULATES_TRANSCRIPTION_OF_CELL_CYCLE_FACTORS	0.524221	0.884606	0.0692836	0.554858	0.980972	5
WP_KYNURENINE_PATHWAY_AND_LINKS_TO_CELL_SENESCENCE	0.512987	0.881275	0.0672065	0.441903	0.980708	12
BIOCARTA_PDZS_PATHWAY	0.48265	0.863265	0.0687943	0.407153	0.980121	16
REACTOME_THE_ROLE_OF_NEF_IN_HIV_1_REPLICATION_AND_DISEASE_PATHOGENESIS	0.486154	0.863465	0.0672065	0.372548	0.978034	24
BIOCARTA_MTA3_PATHWAY	0.5	0.87635	0.067676	0.414834	0.977863	15
REACTOME_CHOLESTEROL_BIOSYNTHESIS	0.496112	0.872512	0.0667426	0.368157	0.977337	26
KEGG_NOTCH_SIGNALING_PATHWAY	0.4919	0.868075	0.0645031	0.329796	0.97691	45
WP_MEASLES_VIRUS_INFECTION	0.51752	0.88223	0.057853	0.295775	0.976803	95
SA_FAS_SIGNALING	0.537415	0.893181	0.0672065	0.492285	0.976654	8
REACTOME_NEF_MEDIATES_DOWN_MODULATION_OF_CELL_SURFACE_RECEPTORS_BY_RECRUITING_THEM_TO_CLATHRIN_ADAPTERS	0.488854	0.865672	0.0686326	0.399238	0.976383	18
WP_TCELL_RECEPTOR_SIGNALING_PATHWAY	0.511299	0.881275	0.0606404	0.308444	0.976111	66
WP_ENDODERM_DIFFERENTIATION	0.5	0.87635	0.0572461	0.28441	0.975684	123
REACTOME_CASPASE_ACTIVATION_VIA_EXTRINSIC_APOPTOTIC_SIGNALLING_PATHWAY	0.490712	0.867922	0.0670513	0.390969	0.975577	19
REACTOME_CYTOKINE_SIGNALING_IN_IMMUNE_SYSTEM	0.575563	0.900911	0.042417	0.253916	0.975338	501
PID_MYC_REPRESS_PATHWAY	0.51585	0.88223	0.0611693	0.316817	0.975203	55
REACTOME_PRE_NOTCH_EXPRESSION_AND_PROCESSING	0.503608	0.878883	0.0623861	0.322317	0.975166	49
SA_B_CELL_RECEPTOR_COMPLEXES	0.509288	0.880468	0.0652353	0.378003	0.974602	22
WP_DISORDERS_OF_FOLATE_METABOLISM_AND_TRANSPORT	0.490712	0.867922	0.0670513	0.390543	0.974513	19
BIOCARTA_TH1TH2_PATHWAY	0.56797	0.898404	0.0689567	0.629289	0.974493	3
REACTOME_HOMOLOGOUS_DNA_PAIRING_AND_STRAND_EXCHANGE	0.505814	0.880468	0.0625237	0.330082	0.973563	42
REACTOME_INTERACTION_BETWEEN_L1_AND_ANKYRINS	0.503726	0.878883	0.0639272	0.355826	0.972715	29
BIOCARTA_RAS_PATHWAY	0.507042	0.880468	0.0659816	0.381647	0.971699	21
REACTOME_SIGNALING_BY_ROBO_RECEPTORS	0.521212	0.882349	0.0525899	0.268517	0.971009	208
REACTOME_SYNTHESIS_OF_KETONE_BODIES	0.540171	0.894028	0.0672065	0.50439	0.970608	7
REACTOME_SYNTHESIS_SECRETION_AND_DEACYLATION_OF_GHRELIN	0.528736	0.888818	0.0662842	0.44552	0.970351	11
REACTOME_DOPAMINE_RECEPTORS	0.569832	0.898404	0.0687943	0.626498	0.970172	3
REACTOME_PKMTS_METHYLATE_HISTONE_LYSINES	0.509489	0.880468	0.0623861	0.328782	0.968913	43
REACTOME_PLATELET_ADHESION_TO_EXPOSED_COLLAGEN	0.519672	0.882349	0.0670513	0.452369	0.968828	10
WP_MED_AND_PSEUDOACHONDROPLASIA_GENES	0.551418	0.895915	0.0679923	0.578181	0.968593	4
REACTOME_FCGR3A_MEDIATED_IL10_SYNTHESIS	0.512668	0.881275	0.063079	0.354161	0.968164	29
WP_INFLAMMATORY_RESPONSE_PATHWAY	0.517572	0.88223	0.0659816	0.410275	0.967115	15
KEGG_JAK_STAT_SIGNALING_PATHWAY	0.516869	0.88223	0.0579755	0.296039	0.967007	82
WP_METABOLIC_PATHWAY_OF_LDL_HDL_AND_TG_INCLUDING_DISEASES	0.520767	0.882349	0.0656814	0.409918	0.966274	15
WP_VITAMIN_B12_METABOLISM	0.520119	0.882349	0.0623861	0.353234	0.965629	29
WP_RESOLVIN_E1_AND_RESOLVIN_D1_SIGNALING_PATHWAYS_PROMOTING_INFLAMMATION_RESOLUTION	0.54932	0.895586	0.0661326	0.486212	0.964605	8
WP_EICOSANOID_METABOLISM_VIA_CYTOCHROME_P450_MONOOXYGENASES_PATHWAY	0.579143	0.900911	0.0679923	0.622884	0.964575	3
REACTOME_FGFR3B_LIGAND_BINDING_AND_ACTIVATION	0.579143	0.900911	0.0679923	0.622554	0.964063	3
WP_LTF_DANGER_SIGNAL_RESPONSE_PATHWAY	0.552137	0.895915	0.0661326	0.500431	0.962989	7
REACTOME_PIWI_INTERACTING_RNA_PIRNA_BIOGENESIS	0.504777	0.880219	0.0670513	0.393727	0.962904	18
REACTOME_CHYLOMICRON_ASSEMBLY	0.553846	0.896998	0.0659816	0.499569	0.961331	7
PID_P38_GAMMA_DELTA_PATHWAY	0.54023	0.894028	0.0652353	0.441249	0.961048	11
KEGG_PENTOSE_AND_GLUCURONATE_INTERCONVERSIONS	0.52459	0.884744	0.0665892	0.448733	0.961043	10
WP_LACTO_SERIES_SPHINGOLIPID_METABOLISM	0.555363	0.89749	0.0664364	0.543565	0.961006	5
WP_FGFR3_SIGNALING_IN_CHONDROCYTE_PROLIFERATION_AND_TERMINAL_DIFFERENTIATION	0.513846	0.881275	0.0645031	0.365717	0.960099	24
WP_HOMOLOGOUS_RECOMBINATION	0.507937	0.880468	0.0665892	0.419755	0.959134	13
KEGG_FOCAL_ADHESION	0.565217	0.898404	0.0499914	0.268433	0.958869	177
REACTOME_ROLE_OF_SECOND_MESSENGERS_IN_NETRIN_1_SIGNALING	0.555556	0.89749	0.0658312	0.497968	0.958251	7
REACTOME_DEFECTIVE_CSF2RB_CAUSES_SMDP5	0.586074	0.902397	0.0692836	0.717708	0.957763	1
REACTOME_MEMBRANE_TRAFFICKING	0.633862	0.920046	0.0373806	0.248111	0.957541	575
REACTOME_RESOLUTION_OF_D_LOOP_STRUCTURES	0.54294	0.894647	0.0592219	0.336544	0.956253	35
WP_CHOLESTEROL_METABOLISM_WITH_BLOCH_AND_KANDUTSCHRUSSELL_PATHWAYS	0.537226	0.893181	0.0598603	0.324152	0.955268	43
WP_ROBO4_AND_VEGF_SIGNALING_PATHWAYS_CROSSTALK	0.564014	0.898404	0.0656814	0.540242	0.955131	5
REACTOME_DETOXIFICATION_OF_REACTIVE_OXYGEN_SPECIES	0.530211	0.888967	0.0621124	0.352893	0.954457	28
REACTOME_CLEC7A_DECTIN_1_INDUCES_NFAT_ACTIVATION	0.54844	0.895098	0.0645031	0.438214	0.954438	11
REACTOME_SURFACTANT_METABOLISM	0.521672	0.882349	0.0640704	0.382267	0.953862	19
WP_SYNAPTIC_VESICLE_PATHWAY	0.533137	0.892492	0.0606404	0.321996	0.953804	45
PID_VEGFR1_PATHWAY	0.525661	0.886065	0.0639272	0.359009	0.953054	26
WP_EXTRAFOLLICULAR_AND_FOLLICULAR_B_CELL_ACTIVATION_BY_SARSCOV2	0.534743	0.89259	0.0617054	0.352175	0.952515	28
KEGG_VALINE_LEUCINE_AND_ISOLEUCINE_DEGRADATION	0.529927	0.888967	0.0605093	0.323955	0.952485	41
REACTOME_DOWNREGULATION_OF_ERBB2_ERBB3_SIGNALING	0.514286	0.881275	0.0659816	0.41684	0.952474	13
BIOCARTA_NFAT_PATHWAY	0.545985	0.895063	0.0590955	0.323204	0.952473	43
REACTOME_GLUCOCORTICOID_BIOSYNTHESIS	0.589942	0.903523	0.0689567	0.713326	0.951916	1
REACTOME_CALCINEURIN_ACTIVATES_NFAT	0.546952	0.895063	0.0647943	0.461031	0.951882	9
REACTOME_PURINE_CATABOLISM	0.536467	0.893181	0.0649408	0.411889	0.951477	14
REACTOME_RAP1_SIGNALLING	0.541534	0.894028	0.0637845	0.403566	0.9513	15
REACTOME_SYNTHESIS_OF_PIPS_AT_THE_LATE_ENDOSOME_MEMBRANE	0.550082	0.895716	0.0643583	0.436732	0.95121	11
WP_AGERAGE_PATHWAY	0.55761	0.898397	0.0568864	0.304266	0.950428	59
WP_2Q112_COPY_NUMBER_VARIATION_SYNDROME	0.541298	0.894028	0.0599892	0.343257	0.949264	31
WP_STEROL_REGULATORY_ELEMENTBINDING_PROTEINS_SREBP_SIGNALING	0.572238	0.900003	0.0554793	0.301633	0.94925	63
REACTOME_SARS_COV_2_HOST_INTERACTIONS	0.581165	0.901727	0.0486034	0.265975	0.948358	171
REACTOME_DISORDERS_OF_TRANSMEMBRANE_TRANSPORTERS	0.577215	0.900911	0.0498907	0.272307	0.948339	136
BIOCARTA_ECM_PATHWAY	0.527734	0.888102	0.0646485	0.390486	0.947146	17
REACTOME_SIGNALING_BY_SCF_KIT	0.548763	0.895151	0.0587186	0.33074	0.947144	37
PID_HNF3A_PATHWAY	0.560472	0.898404	0.0583453	0.343741	0.947	30
WP_DISORDERS_IN_KETONE_BODY_SYNTHESIS	0.579787	0.90095	0.0655321	0.56509	0.946663	4
BIOCARTA_IL7_PATHWAY	0.560065	0.898404	0.0629395	0.426557	0.946651	12
REACTOME_PHENYLALANINE_AND_TYROSINE_METABOLISM	0.567063	0.898404	0.0645031	0.506655	0.946612	6
REACTOME_SEMA4D_MEDIATED_INHIBITION_OF_CELL_ATTACHMENT_AND_MIGRATION	0.578231	0.900911	0.0636424	0.476731	0.945795	8
WP_BIOGENIC_AMINE_SYNTHESIS	0.576068	0.900911	0.0640704	0.491301	0.945421	7
KEGG_FC_EPSILON_RI_SIGNALING_PATHWAY	0.566282	0.898404	0.0567672	0.307102	0.945299	55
WP_ACE_INHIBITOR_PATHWAY	0.568761	0.898404	0.0643583	0.505743	0.944907	6
BIOCARTA_FCER1_PATHWAY	0.539589	0.894028	0.0598603	0.336847	0.944813	33
REACTOME_TICAM1_DEPENDENT_ACTIVATION_OF_IRF3_IRF7	0.555008	0.89749	0.0639272	0.433488	0.944144	11
BIOCARTA_FMLP_PATHWAY	0.57079	0.898746	0.0579755	0.345058	0.943279	29
WP_THYMIC_STROMAL_LYMPHOPOIETIN_TSLP_SIGNALING_PATHWAY	0.554585	0.89749	0.0582216	0.329191	0.942708	37
REACTOME_TOLL_LIKE_RECEPTOR_CASCADES	0.592545	0.904195	0.049391	0.272599	0.942456	132
REACTOME_TYPE_I_HEMIDESMOSOME_ASSEMBLY	0.583333	0.902397	0.0632191	0.475041	0.942443	8
REACTOME_GENERATION_OF_SECOND_MESSENGER_MOLECULES	0.559105	0.898404	0.062249	0.399774	0.942364	15
REACTOME_ARYL_HYDROCARBON_RECEPTOR_SIGNALLING	0.568761	0.898404	0.0643583	0.504147	0.941926	6
KEGG_PATHOGENIC_ESCHERICHIA_COLI_INFECTION	0.569118	0.898404	0.0574877	0.316284	0.941474	46
WP_PATHOGENIC_ESCHERICHIA_COLI_INFECTION	0.569118	0.898404	0.0574877	0.316284	0.941474	46
BIOCARTA_PTDINS_PATHWAY	0.555728	0.89749	0.0610364	0.36511	0.941359	22
REACTOME_RUNX1_REGULATES_TRANSCRIPTION_OF_GENES_INVOLVED_IN_INTERLEUKIN_SIGNALING	0.585106	0.902397	0.0650878	0.561013	0.939833	4
PID_TCR_CALCIUM_PATHWAY	0.541401	0.894028	0.0636424	0.38399	0.939091	18
REACTOME_FACTORS_INVOLVED_IN_MEGAKARYOCYTE_DEVELOPMENT_AND_PLATELET_PRODUCTION	0.604113	0.911001	0.048506	0.273715	0.938992	123
WP_EXTRACELLULAR_VESICLES_IN_THE_CROSSTALK_OF_CARDIAC_CELLS	0.56869	0.898404	0.0614364	0.398137	0.938503	15
REACTOME_TRANSPORT_AND_SYNTHESIS_OF_PAPS	0.572156	0.900003	0.0640704	0.502054	0.938015	6
REACTOME_FORMATION_OF_INCISION_COMPLEX_IN_GG_NER	0.563504	0.898404	0.0576091	0.318128	0.937516	43
REACTOME_RND1_GTPASE_CYCLE	0.562044	0.898404	0.0577309	0.318816	0.937376	41
BIOCARTA_EFP_PATHWAY	0.56869	0.898404	0.0614364	0.39761	0.937261	15
REACTOME_BASIGIN_INTERACTIONS	0.561815	0.898404	0.0610364	0.367796	0.936432	21
REACTOME_NOTCH3_ACTIVATION_AND_TRANSMISSION_OF_SIGNAL_TO_THE_NUCLEUS	0.557276	0.898397	0.0609039	0.355085	0.936307	25
REACTOME_G_ALPHA_Z_SIGNALLING_EVENTS	0.566423	0.898404	0.0573667	0.318368	0.936058	41
WP_INFLAMMATORY_BOWEL_DISEASE_SIGNALING	0.55205	0.895915	0.062249	0.388781	0.935894	16
WP_OLIGODENDROCYTE_SPECIFICATION_AND_DIFFERENTIATION_LEADING_TO_MYELIN_COMPONENTS_FOR_CNS	0.5625	0.898404	0.0609039	0.371749	0.935406	20
REACTOME_NEUROFASCIN_INTERACTIONS	0.586325	0.902397	0.0632191	0.486055	0.935326	7
REACTOME_BASE_EXCISION_REPAIR_AP_SITE_FORMATION	0.543582	0.894748	0.0632191	0.385335	0.934652	17
REACTOME_SYNTHESIS_OF_IP2_IP_AND_INS_IN_THE_CYTOSOL	0.546032	0.895063	0.063079	0.408504	0.933428	13
KEGG_TERPENOID_BACKBONE_BIOSYNTHESIS	0.546032	0.895063	0.063079	0.40847	0.93335	13
WP_ENDOPLASMIC_RETICULUM_STRESS_RESPONSE_IN_CORONAVIRUS_INFECTION	0.569343	0.898404	0.0571259	0.317368	0.933118	41
REACTOME_METABOLISM_OF_STEROID_HORMONES	0.544892	0.895063	0.0619763	0.373703	0.932494	19
REACTOME_DISEASES_ASSOCIATED_WITH_GLYCOSAMINOGLYCAN_METABOLISM	0.57933	0.900911	0.0561767	0.32529	0.931539	37
WP_DIFFERENTIATION_OF_WHITE_AND_BROWN_ADIPOCYTE	0.561514	0.898404	0.0614364	0.386915	0.931402	16
REACTOME_METAL_ION_SLC_TRANSPORTERS	0.547771	0.895063	0.063079	0.380682	0.931002	18
BIOCARTA_CTL_PATHWAY	0.591696	0.904195	0.0633597	0.526412	0.93068	5
REACTOME_SIGNALLING_TO_ERKS	0.579179	0.900911	0.05653	0.332908	0.929125	32
REACTOME_G_ALPHA_12_13_SIGNALLING_EVENTS	0.604749	0.911001	0.0522693	0.292166	0.928673	68
WP_ARSENIC_METABOLISM_AND_REACTIVE_OXYGEN_SPECIES_GENERATION	0.577997	0.900911	0.0619763	0.42618	0.928226	11
REACTOME_PLATELET_AGGREGATION_PLUG_FORMATION	0.59882	0.908992	0.0552496	0.336491	0.927027	30
PID_AURORA_A_PATHWAY	0.578171	0.900911	0.0568864	0.335187	0.926946	31
WP_CYSTEINE_AND_METHIONINE_CATABOLISM	0.553968	0.896998	0.0623861	0.405576	0.926736	13
REACTOME_SIGNALLING_TO_RAS	0.560372	0.898404	0.0606404	0.371039	0.925846	19
WP_MITOCHONDRIAL_COMPLEX_IV_ASSEMBLY	0.577201	0.900911	0.0559429	0.326132	0.925071	34
BIOCARTA_LYMPHOCYTE_PATHWAY	0.608156	0.911938	0.0632191	0.551948	0.924646	4
BIOCARTA_MONOCYTE_PATHWAY	0.608156	0.911938	0.0632191	0.551948	0.924646	4
KEGG_DORSO_VENTRAL_AXIS_FORMATION	0.584375	0.902397	0.0590955	0.367167	0.923877	20
REACTOME_NOTCH4_ACTIVATION_AND_TRANSMISSION_OF_SIGNAL_TO_THE_NUCLEUS	0.584565	0.902397	0.0614364	0.423978	0.923432	11
PID_S1P_S1P4_PATHWAY	0.586039	0.902397	0.0607719	0.415804	0.922787	12
REACTOME_ERYTHROPOIETIN_ACTIVATES_RAS	0.586039	0.902397	0.0607719	0.415794	0.922766	12
REACTOME_TP53_REGULATES_TRANSCRIPTION_OF_SEVERAL_ADDITIONAL_CELL_DEATH_GENES_WHOSE_SPECIFIC_ROLES_IN_P53_DEPENDENT_APOPTOSIS_REMAIN_UNCERTAIN	0.568254	0.898404	0.0611693	0.40364	0.922313	13
REACTOME_GOLGI_TO_ER_RETROGRADE_TRANSPORT	0.641944	0.921511	0.0454968	0.268571	0.922225	122
WP_GLUCOCORTICOID_RECEPTOR_PATHWAY	0.62069	0.917729	0.0523759	0.299499	0.92186	54
WP_GPCRS_CLASS_C_METABOTROPIC_GLUTAMATE_PHEROMONE	0.588525	0.903146	0.0610364	0.430318	0.921603	10
REACTOME_INSULIN_RECEPTOR_RECYCLING	0.578538	0.900911	0.0593488	0.347118	0.921485	26
WP_DRAVET_SYNDROME	0.578538	0.900911	0.0593488	0.347074	0.921369	26
WP_MARKERS_OF_KIDNEY_CELL_LINEAGE	0.59854	0.908992	0.054794	0.31314	0.920687	41
KEGG_TYROSINE_METABOLISM	0.582043	0.902397	0.0588438	0.349118	0.920574	25
REACTOME_FORMATION_OF_APOPTOSOME	0.586207	0.902397	0.0613026	0.422659	0.920558	11
REACTOME_RET_SIGNALING	0.582973	0.902397	0.0554793	0.324503	0.920451	34
BIOCARTA_HIVNEF_PATHWAY	0.613409	0.914921	0.0525899	0.29856	0.92018	53
WP_SPHINGOLIPID_METABOLISM_INTEGRATED_PATHWAY	0.585139	0.902397	0.0585938	0.348811	0.919763	25
WP_ULCERATIVE_COLITIS_SIGNALING	0.605442	0.911001	0.0614364	0.463563	0.919671	8
REACTOME_RUNX1_REGULATES_TRANSCRIPTION_OF_GENES_INVOLVED_IN_DIFFERENTIATION_OF_KERATINOCYTES	0.611966	0.914228	0.0611693	0.477675	0.919201	7
REACTOME_MITOTIC_PROMETAPHASE	0.657734	0.927385	0.0421619	0.254923	0.917789	195
REACTOME_DEPOLYMERISATION_OF_THE_NUCLEAR_LAMINA	0.592652	0.904195	0.059476	0.388942	0.91683	15
REACTOME_SIGNALING_BY_RECEPTOR_TYROSINE_KINASES	0.744589	0.962458	0.0307753	0.239396	0.916552	457
KEGG_NICOTINATE_AND_NICOTINAMIDE_METABOLISM	0.577399	0.900911	0.0592219	0.367047	0.915883	19
KEGG_CHEMOKINE_SIGNALING_PATHWAY	0.646607	0.922485	0.0452247	0.267058	0.915403	117
REACTOME_INTEGRATION_OF_ENERGY_METABOLISM	0.645074	0.922129	0.0477342	0.278736	0.914485	89
WP_TARGET_OF_RAPAMYCIN_SIGNALING	0.614265	0.915754	0.0534572	0.321579	0.913732	35
WP_LIPID_PARTICLES_COMPOSITION	0.617094	0.91756	0.0607719	0.474673	0.913424	7
REACTOME_PHASE_I_FUNCTIONALIZATION_OF_COMPOUNDS	0.615385	0.91698	0.0523759	0.294749	0.912798	56
WP_EPITHELIAL_TO_MESENCHYMAL_TRANSITION_IN_COLORECTAL_CANCER	0.660759	0.927532	0.0437126	0.261172	0.912558	140
REACTOME_REPRODUCTION	0.622478	0.917729	0.0523759	0.296454	0.912523	55
REACTOME_RHOU_GTPASE_CYCLE	0.618978	0.91756	0.0532386	0.312594	0.912436	40
WP_GALANIN_RECEPTOR_PATHWAY	0.607029	0.911578	0.0583453	0.386806	0.911794	15
REACTOME_VITAMINS	0.648045	0.923254	0.0625237	0.588684	0.911615	3
PID_EPHRINB_REV_PATHWAY	0.594427	0.905744	0.057853	0.35351	0.911452	22
REACTOME_RECYCLING_OF_BILE_ACIDS_AND_SALTS	0.602965	0.911001	0.0601186	0.441115	0.910761	9
REACTOME_GPVI_MEDIATED_ACTIVATION_CASCADE	0.61035	0.913451	0.0558265	0.339207	0.909661	27
WP_MITOCHONDRIAL_COMPLEX_II_ASSEMBLY	0.617347	0.91756	0.0605093	0.458267	0.909165	8
REACTOME_INACTIVATION_OF_CSF3_G_CSF_SIGNALING	0.5966	0.906961	0.0576091	0.348915	0.909127	23
WP_OMEGA9_FATTY_ACID_SYNTHESIS	0.592063	0.904195	0.0592219	0.397845	0.909071	13
REACTOME_CHYLOMICRON_REMODELING	0.622837	0.917729	0.0609039	0.514168	0.909033	5
REACTOME_IRF3_MEDIATED_INDUCTION_OF_TYPE_I_IFN	0.6	0.910335	0.0601186	0.424325	0.908769	10
WP_METABOLISM_OF_SPHINGOLIPIDS_IN_ER_AND_GOLGI_APPARATUS	0.6125	0.914449	0.0568864	0.361004	0.908368	20
WP_MYOMETRIAL_RELAXATION_AND_CONTRACTION_PATHWAYS	0.686375	0.936325	0.0426734	0.262937	0.908291	131
WP_OSTEOCLAST_SIGNALING	0.601639	0.910908	0.0599892	0.423861	0.907774	10
REACTOME_TYSND1_CLEAVES_PEROXISOMAL_PROTEINS	0.620513	0.917729	0.0605093	0.471733	0.907766	7
REACTOME_RHOQ_GTPASE_CYCLE	0.644381	0.921869	0.0501934	0.290602	0.907745	59
REACTOME_CHK1_CHK2_CDS1_MEDIATED_INACTIVATION_OF_CYCLIN_B_CDK1_COMPLEX	0.595238	0.905744	0.0589694	0.396731	0.906525	13
WP_S1P_RECEPTOR_SIGNAL_TRANSDUCTION	0.601538	0.910908	0.057006	0.345192	0.906218	24
REACTOME_GLYCOSAMINOGLYCAN_METABOLISM	0.672704	0.93211	0.043888	0.267423	0.906202	110
KEGG_GLYCEROLIPID_METABOLISM	0.624818	0.917729	0.052805	0.308078	0.905803	41
REACTOME_FATTY_ACYL_COA_BIOSYNTHESIS	0.629794	0.918908	0.052913	0.328706	0.905579	30
KEGG_REGULATION_OF_ACTIN_CYTOSKELETON	0.679104	0.933122	0.0416557	0.254006	0.90494	168
REACTOME_TRANSCRIPTIONAL_REGULATION_BY_NPAS4	0.60472	0.911001	0.054794	0.327214	0.904898	31
WP_ACQUIRED_PARTIAL_LIPODYSTROPHY_BARRAQUERSIMONS_SYNDROME	0.604918	0.911001	0.0597318	0.42243	0.904709	10
BIOCARTA_GHRELIN_PATHWAY	0.62415	0.917729	0.0599892	0.455626	0.903924	8
WP_LUNG_FIBROSIS	0.60767	0.911938	0.0545681	0.326771	0.903672	31
REACTOME_TELOMERE_C_STRAND_SYNTHESIS_INITIATION	0.595238	0.905744	0.0589694	0.395479	0.903664	13
PID_P75_NTR_PATHWAY	0.640227	0.921511	0.0502948	0.286939	0.903007	63
WP_LIVER_X_RECEPTOR_PATHWAY	0.631488	0.91964	0.0602484	0.51067	0.902848	5
REACTOME_RESPIRATORY_ELECTRON_TRANSPORT	0.678899	0.933122	0.044064	0.269171	0.902374	103
BIOCARTA_PEPI_PATHWAY	0.661509	0.927532	0.0633597	0.675878	0.901942	1
WP_NUCLEAR_RECEPTORS_METAPATHWAY	0.711377	0.95053	0.0377705	0.248537	0.901717	213
WP_OVARIAN_INFERTILITY	0.606154	0.911001	0.0566484	0.343452	0.90165	24
REACTOME_GOLGI_ASSOCIATED_VESICLE_BIOGENESIS	0.641026	0.921511	0.0504983	0.290793	0.900547	56
PID_AR_NONGENOMIC_PATHWAY	0.619469	0.917616	0.053677	0.325532	0.900246	31
BIOCARTA_NEUTROPHIL_PATHWAY	0.662921	0.927981	0.0617054	0.620805	0.900179	2
REACTOME_HEME_DEGRADATION	0.623932	0.917729	0.0602484	0.467411	0.899449	7
PID_PRL_SIGNALING_EVENTS_PATHWAY	0.612056	0.914228	0.0564118	0.34491	0.898691	23
REACTOME_TRNA_PROCESSING_IN_THE_MITOCHONDRION	0.621392	0.917729	0.0601186	0.480892	0.898477	6
REACTOME_HDR_THROUGH_MMEJ_ALT_NHEJ	0.608766	0.911966	0.0589694	0.404833	0.89844	12
REACTOME_REGULATION_OF_GENE_EXPRESSION_IN_EARLY_PANCREATIC_PRECURSOR_CELLS	0.634948	0.920046	0.0599892	0.507835	0.897837	5
PID_FRA_PATHWAY	0.638973	0.921511	0.0533478	0.331783	0.897361	28
NABA_COLLAGENS	0.627365	0.917972	0.0524828	0.315606	0.89676	35
REACTOME_COLLAGEN_CHAIN_TRIMERIZATION	0.627365	0.917972	0.0524828	0.315606	0.89676	35
REACTOME_IRON_UPTAKE_AND_TRANSPORT	0.651734	0.92509	0.0503964	0.292341	0.896707	52
REACTOME_POLYMERASE_SWITCHING_ON_THE_C_STRAND_OF_THE_TELOMERE	0.623639	0.917729	0.0558265	0.337723	0.896547	26
BIOCARTA_BARRESTIN_PATHWAY	0.615764	0.917101	0.0589694	0.411628	0.896532	11
WP_EBOLA_VIRUS_INFECTION_IN_HOST	0.694848	0.93966	0.0433637	0.268473	0.8963	101
REACTOME_SYNTHESIS_OF_16_20_HYDROXYEICOSATETRAENOIC_ACIDS_HETE	0.666667	0.929174	0.0611693	0.578569	0.89595	3
WP_SECRETION_OF_HYDROCHLORIC_ACID_IN_PARIETAL_CELLS	0.674157	0.933122	0.0609039	0.617297	0.895093	2
WP_HEPATITIS_B_INFECTION	0.714286	0.95125	0.0404935	0.259748	0.895005	125
BIOCARTA_CFTR_PATHWAY	0.618033	0.91756	0.0587186	0.417658	0.894489	10
PID_TCPTP_PATHWAY	0.651095	0.925035	0.0509083	0.306329	0.894151	40
BIOCARTA_AKAPCENTROSOME_PATHWAY	0.606349	0.911001	0.0580984	0.391151	0.893776	13
REACTOME_PARACETAMOL_ADME	0.62776	0.918114	0.0561767	0.371239	0.893666	16
BIOCARTA_STEM_PATHWAY	0.677903	0.933122	0.0606404	0.616202	0.893504	2
REACTOME_COBALAMIN_CBL_METABOLISM	0.624788	0.917729	0.0598603	0.47812	0.893298	6
REACTOME_REGULATION_OF_NF_KAPPA_B_SIGNALING	0.603803	0.911001	0.0582216	0.368157	0.892986	17
REACTOME_ALPHA_LINOLENIC_OMEGA3_AND_LINOLEIC_OMEGA6_ACID_METABOLISM	0.62013	0.917729	0.0580984	0.402322	0.892867	12
REACTOME_REGULATION_OF_GENE_EXPRESSION_IN_BETA_CELLS	0.621753	0.917729	0.0579755	0.402048	0.89226	12
WP_PRIMARY_FOCAL_SEGMENTAL_GLOMERULOSCLEROSIS_FSGS	0.667139	0.929412	0.0484088	0.283455	0.892042	63
WP_TNFALPHA_SIGNALING_PATHWAY	0.694595	0.93966	0.0444181	0.272557	0.890837	84
REACTOME_CYTOCHROME_C_MEDIATED_APOPTOTIC_RESPONSE	0.611111	0.914133	0.0577309	0.389841	0.890781	13
REACTOME_ANDROGEN_BIOSYNTHESIS	0.640071	0.921511	0.0607719	0.531692	0.890713	4
REACTOME_SPERM_MOTILITY_AND_TAXES	0.672253	0.932006	0.0607719	0.574876	0.890231	3
WP_SARSCOV2_INNATE_IMMUNITY_EVASION_AND_CELLSPECIFIC_IMMUNE_RESPONSE	0.647744	0.923252	0.0510114	0.310573	0.889392	37
WP_SCFA_AND_SKELETAL_MUSCLE_SUBSTRATE_METABOLISM	0.683521	0.935241	0.0602484	0.613199	0.889151	2
WP_NOTCH1_REGULATION_OF_ENDOTHELIAL_CELL_CALCIFICATION	0.635647	0.920046	0.0555947	0.369362	0.889149	16
REACTOME_RAF_INDEPENDENT_MAPK1_3_ACTIVATION	0.643192	0.921511	0.0546808	0.349207	0.889103	21
KEGG_PRIMARY_BILE_ACID_BIOSYNTHESIS	0.62459	0.917729	0.0582216	0.415118	0.889048	10
KEGG_GLYCOSPHINGOLIPID_BIOSYNTHESIS_LACTO_AND_NEOLACTO_SERIES	0.651563	0.92509	0.0540088	0.353188	0.888702	20
BIOCARTA_RAB_PATHWAY	0.626623	0.917972	0.0576091	0.400398	0.888598	12
REACTOME_FGFR1_LIGAND_BINDING_AND_ACTIVATION	0.626486	0.917972	0.0597318	0.475491	0.888385	6
REACTOME_TRANSLATION_OF_REPLICASE_AND_ASSEMBLY_OF_THE_REPLICATION_TRANSCRIPTION_COMPLEX	0.643436	0.921511	0.0562941	0.384433	0.888054	14
PID_EPO_PATHWAY	0.654867	0.92672	0.0511148	0.321861	0.886722	30
WP_OXIDATION_BY_CYTOCHROME_P450	0.634526	0.920046	0.0550211	0.333385	0.885029	26
BIOCARTA_EGFR_SMRTE_PATHWAY	0.623974	0.917729	0.0583453	0.406302	0.884933	11
PID_CXCR4_PATHWAY	0.708108	0.947936	0.0435378	0.270749	0.88493	84
REACTOME_XENOBIOTICS	0.642735	0.921511	0.0588438	0.459809	0.88482	7
WP_CHOLESTEROL_METABOLISM	0.679379	0.933122	0.0474483	0.283373	0.884676	58
REACTOME_BIOSYNTHESIS_OF_THE_N_GLYCAN_PRECURSOR_DOLICHOL_LIPID_LINKED_OLIGOSACCHARIDE_LLO_AND_TRANSFER_TO_A_NASCENT_PROTEIN	0.696721	0.941276	0.0447749	0.275341	0.884255	73
REACTOME_RUNX3_REGULATES_IMMUNE_RESPONSE_AND_CELL_MIGRATION	0.674115	0.933122	0.0606404	0.570969	0.884181	3
BIOCARTA_KREB_PATHWAY	0.64966	0.923988	0.0580984	0.445515	0.883865	8
REACTOME_HIGHLY_CALCIUM_PERMEABLE_NICOTINIC_ACETYLCHOLINE_RECEPTORS	0.653979	0.92672	0.0585938	0.499823	0.883673	5
PID_THROMBIN_PAR1_PATHWAY	0.654676	0.92672	0.0499914	0.303651	0.883563	39
WP_MAPK_PATHWAY_IN_CONGENITAL_THYROID_CANCER	0.643533	0.921511	0.0550211	0.3668	0.88298	16
WP_P38_MAPK_SIGNALING_PATHWAY	0.64956	0.923988	0.0512184	0.314694	0.882677	33
REACTOME_NEF_MEDIATED_CD4_DOWN_REGULATION	0.654762	0.92672	0.0577309	0.443913	0.880687	8
BIOCARTA_IL6_PATHWAY	0.664062	0.928511	0.0531298	0.349523	0.879481	20
KEGG_CIRCADIAN_RHYTHM_MAMMAL	0.633826	0.920046	0.0576091	0.403719	0.879306	11
BIOCARTA_VEGF_PATHWAY	0.642302	0.921511	0.0544556	0.331155	0.87911	26
REACTOME_INTERLEUKIN_10_SIGNALING	0.63961	0.921511	0.0566484	0.396118	0.879098	12
REACTOME_PLASMA_LIPOPROTEIN_REMODELING	0.653251	0.92672	0.0534572	0.352181	0.87879	19
REACTOME_DEVELOPMENTAL_BIOLOGY	0.914433	1	0.0163561	0.224475	0.878464	807
REACTOME_DEFECTIVE_CHST3_CAUSES_SEDCJD	0.658163	0.927385	0.0574877	0.442589	0.87806	8
KEGG_BASAL_TRANSCRIPTION_FACTORS	0.660767	0.927532	0.0507028	0.317344	0.877604	31
REACTOME_TELOMERE_C_STRAND_LAGGING_STRAND_SYNTHESIS	0.658009	0.927385	0.0498907	0.309273	0.877251	34
BIOCARTA_CCR3_PATHWAY	0.658023	0.927385	0.0552496	0.379689	0.877094	14
REACTOME_DEFECTIVE_ST3GAL3_CAUSES_MCT12_AND_EIEE15	0.655709	0.926892	0.0584693	0.495761	0.87649	5
REACTOME_PI_3K_CASCADE_FGFR1	0.633826	0.920046	0.0576091	0.402193	0.875983	11
REACTOME_DSCAM_INTERACTIONS	0.645902	0.922485	0.0566484	0.409011	0.87597	10
PID_SYNDECAN_1_PATHWAY	0.671554	0.932006	0.0496901	0.307284	0.875202	36
WP_FOLATE_METABOLISM	0.690511	0.936943	0.048215	0.297473	0.874624	41
BIOCARTA_FIBRINOLYSIS_PATHWAY	0.645161	0.922129	0.0583453	0.468087	0.874552	6
REACTOME_VEGFR2_MEDIATED_VASCULAR_PERMEABILITY	0.642302	0.921511	0.0544556	0.329051	0.873523	26
REACTOME_LDL_CLEARANCE	0.643312	0.921511	0.0554793	0.357124	0.873388	18
WP_VITAMIN_DSENSITIVE_CALCIUM_SIGNALING_IN_DEPRESSION	0.679758	0.933122	0.0504983	0.322632	0.87261	28
REACTOME_NOD1_2_SIGNALING_PATHWAY	0.664223	0.928511	0.0501934	0.311043	0.872437	33
REACTOME_NERVOUS_SYSTEM_DEVELOPMENT	0.888532	0.998472	0.0207818	0.226718	0.871756	535
REACTOME_ONCOGENE_INDUCED_SENESCENCE	0.670088	0.93117	0.0497903	0.312145	0.871175	32
PID_RAS_PATHWAY	0.659056	0.927532	0.0522693	0.324367	0.869863	27
BIOCARTA_SLRP_PATHWAY	0.670213	0.93117	0.0585938	0.518085	0.867918	4
KEGG_CYTOKINE_CYTOKINE_RECEPTOR_INTERACTION	0.752988	0.965666	0.0399219	0.260495	0.867599	100
KEGG_PARKINSONS_DISEASE	0.758847	0.969952	0.0389556	0.258695	0.867254	103
REACTOME_CONDENSATION_OF_PROMETAPHASE_CHROMOSOMES	0.660099	0.927532	0.0557104	0.398005	0.866862	11
REACTOME_TNF_RECEPTOR_SUPERFAMILY_TNFSF_MEMBERS_MEDIATING_NON_CANONICAL_NF_KB_PATHWAY	0.662295	0.927981	0.0554793	0.404672	0.866677	10
REACTOME_TYROSINE_CATABOLISM	0.702247	0.945014	0.0589694	0.597628	0.866572	2
WP_TYROSINE_METABOLISM_AND_RELATED_DISORDERS	0.702247	0.945014	0.0589694	0.597628	0.866572	2
KEGG_RENIN_ANGIOTENSIN_SYSTEM	0.661538	0.927532	0.0574877	0.449943	0.865835	7
REACTOME_VITAMIN_D_CALCIFEROL_METABOLISM	0.678571	0.933122	0.0560596	0.4364	0.865781	8
WP_ATM_SIGNALING_PATHWAY	0.686331	0.936325	0.04783	0.297437	0.865481	39
REACTOME_RHOD_GTPASE_CYCLE	0.718208	0.952192	0.0459538	0.281831	0.864468	52
REACTOME_PKA_ACTIVATION_IN_GLUCAGON_SIGNALLING	0.654952	0.92672	0.054794	0.366449	0.863807	15
WP_AMPACTIVATED_PROTEIN_KINASE_SIGNALING	0.723647	0.953151	0.0449543	0.278902	0.863724	56
WP_GLYCEROPHOSPHOLIPID_BIOSYNTHETIC_PATHWAY	0.657895	0.927385	0.0531298	0.327313	0.863076	25
REACTOME_FORMATION_OF_AXIAL_MESODERM	0.666667	0.929174	0.0552496	0.395605	0.861634	11
BIOCARTA_BARRESTIN_SRC_PATHWAY	0.669368	0.93117	0.0544556	0.372527	0.86055	14
WP_IL3_SIGNALING_PATHWAY	0.702742	0.945267	0.046882	0.297836	0.860066	38
WP_NEUROGENESIS_REGULATION_IN_THE_OLFACTORY_EPITHELIUM	0.724679	0.953151	0.0449543	0.279035	0.860002	53
REACTOME_NEF_MEDIATED_DOWNREGULATION_OF_MHC_CLASS_I_COMPLEX_CELL_SURFACE_EXPRESSION	0.672131	0.932006	0.054794	0.401448	0.859773	10
REACTOME_RHO_GTPASES_ACTIVATE_FORMINS	0.787918	0.982592	0.0363018	0.248575	0.859398	132
BIOCARTA_PKC_PATHWAY	0.664957	0.928731	0.0572461	0.446442	0.859097	7
KEGG_ENDOCYTOSIS	0.796992	0.982592	0.0345664	0.24182	0.858706	167
WP_TRANSSULFURATION_ONECARBON_METABOLISM_AND_RELATED_PATHWAYS	0.718391	0.952192	0.045679	0.278833	0.85825	54
REACTOME_POST_TRANSLATIONAL_PROTEIN_MODIFICATION	0.963746	1	0.0097825	0.216851	0.857977	1192
WP_BIOMARKERS_FOR_UREA_CYCLE_DISORDERS	0.688776	0.936943	0.0553643	0.432071	0.857193	8
BIOCARTA_S1P_PATHWAY	0.688776	0.936943	0.0553643	0.431626	0.856311	8
REACTOME_ACTIVATION_OF_CASPASES_THROUGH_APOPTOSOME_MEDIATED_CLEAVAGE	0.672326	0.932006	0.0564118	0.458074	0.855844	6
REACTOME_SODIUM_CALCIUM_EXCHANGERS	0.678748	0.933122	0.0545681	0.413779	0.854323	9
REACTOME_MEIOTIC_RECOMBINATION	0.68779	0.936943	0.0510114	0.327873	0.854299	23
REACTOME_REGULATION_OF_GENE_EXPRESSION_BY_HYPOXIA_INDUCIBLE_FACTOR	0.680395	0.933122	0.0544556	0.412941	0.852591	9
WP_MITOCHONDRIAL_COMPLEX_I_ASSEMBLY_MODEL_OXPHOS_SYSTEM	0.745014	0.962458	0.0436251	0.275047	0.851784	56
REACTOME_REGULATION_OF_TP53_ACTIVITY_THROUGH_METHYLATION	0.685759	0.936325	0.0512184	0.341338	0.851733	19
WP_MITOCHONDRIAL_FATTY_ACID_SYNTHESIS_PATHWAY	0.684211	0.935442	0.0555947	0.455842	0.851675	6
REACTOME_TRANSLATION_OF_SARS_COV_1_STRUCTURAL_PROTEINS	0.71386	0.95125	0.0476387	0.311511	0.851571	29
WP_MACROPHAGE_MARKERS	0.691489	0.937082	0.0571259	0.508287	0.851504	4
REACTOME_TRAIL_SIGNALING	0.678632	0.933122	0.0562941	0.442489	0.851492	7
WP_TOLLLIKE_RECEPTOR_SIGNALING_RELATED_TO_MYD88	0.690881	0.936943	0.0508054	0.326698	0.851238	23
REACTOME_CLASS_C_3_METABOTROPIC_GLUTAMATE_PHEROMONE_RECEPTORS	0.678161	0.933122	0.0544556	0.390831	0.851237	11
REACTOME_MITOCHONDRIAL_IRON_SULFUR_CLUSTER_BIOGENESIS	0.669841	0.93117	0.0534572	0.372051	0.850132	13
PID_ENDOTHELIN_PATHWAY	0.752161	0.965008	0.0437126	0.276164	0.850068	55
REACTOME_INTERLEUKIN_1_FAMILY_SIGNALING	0.791774	0.982592	0.036073	0.247761	0.849956	123
REACTOME_G_PROTEIN_MEDIATED_EVENTS	0.743146	0.962458	0.0443293	0.280299	0.848041	49
REACTOME_TRYPTOPHAN_CATABOLISM	0.704082	0.946339	0.0543434	0.427446	0.848017	8
REACTOME_AMINO_ACID_CONJUGATION	0.728464	0.955255	0.0572461	0.584474	0.847498	2
REACTOME_CONJUGATION_OF_BENZOATE_WITH_GLYCINE	0.728464	0.955255	0.0572461	0.584474	0.847498	2
BIOCARTA_GPCR_PATHWAY	0.71535	0.95159	0.0475434	0.309767	0.846805	29
WP_CYTOKINES_AND_INFLAMMATORY_RESPONSE	0.705674	0.947145	0.0561767	0.50524	0.846399	4
WP_REGULATION_OF_SISTER_CHROMATID_SEPARATION_AT_THE_METAPHASEANAPHASE_TRANSITION	0.690096	0.936943	0.0523759	0.358929	0.846082	15
REACTOME_ACETYLCHOLINE_BINDING_AND_DOWNSTREAM_EVENTS	0.683761	0.935241	0.0559429	0.438892	0.844568	7
REACTOME_SHC_MEDIATED_CASCADE_FGFR1	0.689655	0.936943	0.053677	0.38773	0.844482	11
REACTOME_DISEASES_OF_DNA_REPAIR	0.750357	0.963865	0.0433637	0.276801	0.843678	50
REACTOME_BETA_OXIDATION_OF_VERY_LONG_CHAIN_FATTY_ACIDS	0.693575	0.939108	0.0535669	0.408479	0.843379	9
KEGG_RIBOFLAVIN_METABOLISM	0.683442	0.935241	0.0535669	0.379914	0.843137	12
WP_EGFEGFR_SIGNALING_PATHWAY	0.834379	0.992818	0.0324331	0.238034	0.842862	158
WP_IL5_SIGNALING_PATHWAY	0.733624	0.956907	0.0453152	0.296593	0.842736	35
PID_CD8_TCR_DOWNSTREAM_PATHWAY	0.714076	0.95125	0.046882	0.300428	0.842661	33
REACTOME_ACTIVATION_OF_NIMA_KINASES_NEK9_NEK6_NEK7	0.687179	0.936943	0.0557104	0.437897	0.842655	7
REACTOME_NR1H2_NR1H3_REGULATE_GENE_EXPRESSION_TO_LIMIT_CHOLESTEROL_UPTAKE	0.704152	0.946339	0.0551352	0.476246	0.841989	5
BIOCARTA_RACC_PATHWAY	0.690164	0.936943	0.0535669	0.392989	0.841657	10
WP_AIRWAY_SMOOTH_MUSCLE_CELL_CONTRACTION	0.68254	0.935241	0.0525899	0.368339	0.841651	13
REACTOME_AUTOPHAGY	0.822335	0.988398	0.033677	0.24108	0.841565	142
REACTOME_SIGNALING_BY_INTERLEUKINS	0.886161	0.998472	0.0232958	0.22469	0.841381	323
REACTOME_JOSEPHIN_DOMAIN_DUBS	0.699507	0.943638	0.0530213	0.385497	0.839619	11
REACTOME_INTERLEUKIN_1_PROCESSING	0.712766	0.95053	0.0557104	0.499582	0.83692	4
BIOCARTA_CK1_PATHWAY	0.690476	0.936943	0.052057	0.366198	0.836757	13
WP_MELATONIN_METABOLISM_AND_EFFECTS	0.70624	0.947227	0.049094	0.31172	0.835948	27
KEGG_APOPTOSIS	0.790984	0.982592	0.0389556	0.260117	0.835364	73
REACTOME_PROLONGED_ERK_ACTIVATION_EVENTS	0.690476	0.936943	0.052057	0.365522	0.835213	13
KEGG_ONE_CARBON_POOL_BY_FOLATE	0.700475	0.943866	0.0513223	0.344052	0.834516	17
WP_ENDOTHELIN_PATHWAYS	0.718266	0.952192	0.049094	0.323386	0.833784	22
REACTOME_RHOF_GTPASE_CYCLE	0.774709	0.978463	0.0427591	0.282413	0.832964	42
WP_SRF_AND_MIRS_IN_SMOOTH_MUSCLE_DIFFERENTIATION_AND_PROLIFERATION	0.707718	0.947936	0.0524828	0.382265	0.832579	11
WP_COMMON_PATHWAYS_UNDERLYING_DRUG_ADDICTION	0.743814	0.962458	0.0446854	0.292912	0.832277	35
BIOCARTA_TUBBY_PATHWAY	0.716312	0.95159	0.0554793	0.496754	0.832182	4
REACTOME_REGULATION_OF_FZD_BY_UBIQUITINATION	0.729688	0.955255	0.048799	0.33061	0.831892	20
WP_MAPK_SIGNALING_PATHWAY	0.884848	0.998472	0.0277996	0.229709	0.830672	208
REACTOME_CASPASE_ACTIVATION_VIA_DEATH_RECEPTORS_IN_THE_PRESENCE_OF_LIGAND	0.705107	0.946797	0.052805	0.402253	0.830525	9
REACTOME_MITOCHONDRIAL_BIOGENESIS	0.814714	0.985528	0.0374584	0.258051	0.83042	74
REACTOME_DEFECTIVE_B4GALT1_CAUSES_B4GALT1_CDG_CDG_2D	0.716263	0.95159	0.0543434	0.46958	0.830204	5
KEGG_PATHWAYS_IN_CANCER	0.909404	1	0.0233667	0.222566	0.829676	284
BIOCARTA_ION_PATHWAY	0.721453	0.953151	0.0540088	0.468917	0.829031	5
WP_GABA_RECEPTOR_SIGNALING	0.72457	0.953151	0.0491928	0.325574	0.828934	21
REACTOME_ABC_FAMILY_PROTEINS_MEDIATED_TRANSPORT	0.83558	0.993291	0.0357691	0.252433	0.828003	90
WP_SPHINGOLIPID_METABOLISM_OVERVIEW	0.724458	0.953151	0.0487011	0.321136	0.827981	22
PID_IL27_PATHWAY	0.701299	0.944563	0.0523759	0.37267	0.82706	12
REACTOME_HDMS_DEMETHYLATE_HISTONES	0.7277	0.955255	0.0489954	0.32463	0.82653	21
REACTOME_TP53_REGULATES_TRANSCRIPTION_OF_GENES_INVOLVED_IN_G1_CELL_CYCLE_ARREST	0.721232	0.953151	0.0510114	0.357507	0.825854	14
REACTOME_PYROPTOSIS	0.721338	0.953151	0.0501934	0.337549	0.825516	18
REACTOME_NR1H2_NR1H3_REGULATE_GENE_EXPRESSION_LINKED_TO_TRIGLYCERIDE_LIPOLYSIS_IN_ADIPOSE	0.725177	0.953399	0.0549074	0.492745	0.825466	4
WP_RIBOFLAVIN_AND_COQ_DISORDERS	0.706349	0.947227	0.0510114	0.360816	0.82446	13
KEGG_GNRH_SIGNALING_PATHWAY	0.818792	0.986069	0.0365315	0.252557	0.824399	81
REACTOME_SYNTHESIS_OF_BILE_ACIDS_AND_BILE_SALTS_VIA_27_HYDROXYCHOLESTEROL	0.711697	0.95053	0.0523759	0.399186	0.824191	9
WP_CHEMOKINE_SIGNALING_PATHWAY	0.850129	0.995335	0.0329431	0.242365	0.823784	112
REACTOME_GASTRULATION	0.773449	0.977272	0.0425023	0.285258	0.823743	38
BIOCARTA_HDAC_PATHWAY	0.735294	0.956907	0.048022	0.318958	0.822365	22
REACTOME_N_GLYCAN_ANTENNAE_ELONGATION_IN_THE_MEDIAL_TRANS_GOLGI	0.735294	0.956907	0.048022	0.318928	0.822289	22
WP_PDGFRBETA_PATHWAY	0.749627	0.963865	0.0454059	0.300691	0.821992	29
WP_DEVELOPMENT_OF_PULMONARY_DENDRITIC_CELLS_AND_MACROPHAGE_SUBSETS	0.712821	0.95053	0.0540088	0.427118	0.821912	7
REACTOME_HIGHLY_CALCIUM_PERMEABLE_POSTSYNAPTIC_NICOTINIC_ACETYLCHOLINE_RECEPTORS	0.718166	0.952192	0.0533478	0.439878	0.821849	6
REACTOME_POLO_LIKE_KINASE_MEDIATED_EVENTS	0.725552	0.953485	0.0494905	0.341318	0.821639	16
WP_DUAL_HIJACK_MODEL_OF_VIF_IN_HIV_INFECTION	0.729592	0.955255	0.0526973	0.414102	0.821545	8
REACTOME_TP53_REGULATES_TRANSCRIPTION_OF_CASPASE_ACTIVATORS_AND_CASPASES	0.716393	0.95159	0.0518458	0.383352	0.821017	10
PID_TCR_RAS_PATHWAY	0.712698	0.95053	0.0506004	0.358988	0.820284	13
BIOCARTA_BIOPEPTIDES_PATHWAY	0.733638	0.956907	0.0473534	0.305787	0.820037	27
KEGG_BETA_ALANINE_METABOLISM	0.709984	0.949211	0.0507028	0.338059	0.819979	17
REACTOME_TERMINATION_OF_TRANSLESION_DNA_SYNTHESIS	0.765487	0.972405	0.0439759	0.29644	0.819794	31
REACTOME_INFECTIOUS_DISEASE	0.977249	1	0.011106	0.209475	0.819378	789
BIOCARTA_TCR_PATHWAY	0.766862	0.97312	0.0436251	0.28735	0.818425	36
WP_AMINO_ACID_METABOLISM_PATHWAY_EXCERPT_HISTIDINE_CATABOLISM_EXTENSION	0.730496	0.955909	0.0545681	0.488533	0.818411	4
REACTOME_REGULATION_OF_TP53_ACTIVITY	0.87768	0.998472	0.0302042	0.23222	0.817786	153
WP_CHOLESTEROL_SYNTHESIS_DISORDERS	0.724247	0.953151	0.0497903	0.336687	0.816652	17
REACTOME_BRANCHED_CHAIN_AMINO_ACID_CATABOLISM	0.744914	0.962458	0.0479259	0.320724	0.816584	21
WP_TYPE_II_DIABETES_MELLITUS	0.724247	0.953151	0.0497903	0.3366	0.816442	17
WP_FAMILIAL_HYPERLIPIDEMIA_TYPE_2	0.715873	0.95159	0.0503964	0.35723	0.816266	13
KEGG_MAPK_SIGNALING_PATHWAY	0.923445	1	0.0248494	0.22399	0.816079	221
BIOCARTA_AKAP95_PATHWAY	0.72459	0.953151	0.0513223	0.381046	0.816078	10
REACTOME_REGULATED_NECROSIS	0.81296	0.985528	0.0411544	0.275443	0.815907	45
WP_WNT_SIGNALING	0.864759	0.998472	0.0324331	0.242746	0.815619	104
REACTOME_REGULATION_OF_INSULIN_SECRETION	0.807042	0.984072	0.0394367	0.258088	0.815133	64
WP_NONSMALL_CELL_LUNG_CANCER	0.810585	0.985423	0.0387167	0.255622	0.815007	69
BIOCARTA_RNAPOL3_PATHWAY	0.721368	0.953151	0.0534572	0.42271	0.81343	7
REACTOME_REGULATION_OF_KIT_SIGNALING	0.736422	0.957543	0.049391	0.344827	0.812841	15
REACTOME_SIGNALING_BY_ERBB4	0.796537	0.982592	0.0411544	0.268615	0.812692	49
WP_TYPE_2_PAPILLARY_RENAL_CELL_CARCINOMA	0.772861	0.97721	0.0435378	0.293826	0.812565	31
WP_ANGIOPOIETINLIKE_PROTEIN_8_REGULATORY_PATHWAY	0.87452	0.998472	0.0311335	0.23658	0.810933	117
REACTOME_PHOSPHOLIPASE_C_MEDIATED_CASCADE_FGFR4	0.735144	0.956907	0.0522693	0.433894	0.810668	6
REACTOME_NEUROTOXICITY_OF_CLOSTRIDIUM_TOXINS	0.729508	0.955255	0.0510114	0.378267	0.810126	10
REACTOME_GLUTAMATE_AND_GLUTAMINE_METABOLISM	0.743922	0.962458	0.0495902	0.350645	0.810003	14
REACTOME_COBALAMIN_CBL_VITAMIN_B12_TRANSPORT_AND_METABOLISM	0.743922	0.962458	0.0495902	0.350229	0.80904	14
PID_HIV_NEF_PATHWAY	0.77566	0.979197	0.0431037	0.289811	0.808843	32
BIOCARTA_DREAM_PATHWAY	0.740558	0.961323	0.0503964	0.371126	0.808319	11
REACTOME_PREGNENOLONE_BIOSYNTHESIS	0.740558	0.961323	0.0503964	0.370636	0.807252	11
REACTOME_TOLL_LIKE_RECEPTOR_TLR1_TLR2_CASCADE	0.863454	0.998472	0.0338984	0.243274	0.807078	96
REACTOME_BASE_EXCISION_REPAIR	0.825185	0.98922	0.0407404	0.273238	0.805688	44
BIOCARTA_MITOCHONDRIA_PATHWAY	0.747678	0.963865	0.0472587	0.322838	0.805571	19
REACTOME_MYD88_INDEPENDENT_TLR4_CASCADE	0.875166	0.998472	0.0328701	0.241949	0.804816	98
REACTOME_PHENYLALANINE_METABOLISM	0.739362	0.960578	0.0540088	0.480131	0.804335	4
PID_WNT_SIGNALING_PATHWAY	0.765163	0.972405	0.0464155	0.302804	0.803846	26
WP_WNT_SIGNALING_PATHWAY	0.815296	0.985528	0.0400846	0.265573	0.803489	49
REACTOME_RUNX2_REGULATES_GENES_INVOLVED_IN_CELL_MIGRATION	0.745331	0.962458	0.0516356	0.43	0.803392	6
REACTOME_CATION_COUPLED_CHLORIDE_COTRANSPORTERS	0.750865	0.963865	0.052163	0.451717	0.798622	5
REACTOME_G2_M_DNA_DAMAGE_CHECKPOINT	0.849218	0.995335	0.0375363	0.255569	0.798313	59
WP_OVERVIEW_OF_PROINFLAMMATORY_AND_PROFIBROTIC_MEDIATORS	0.760252	0.969952	0.0473534	0.33152	0.798053	16
REACTOME_CARNITINE_METABOLISM	0.743506	0.962458	0.0496901	0.359572	0.797993	12
WP_ALSTROM_SYNDROME	0.806638	0.984072	0.0405756	0.281253	0.797772	34
PID_P38_MK2_PATHWAY	0.770898	0.975648	0.045862	0.319524	0.797302	19
REACTOME_N_GLYCAN_ANTENNAE_ELONGATION	0.76013	0.969952	0.0486034	0.345037	0.797048	14
BIOCARTA_ERK5_PATHWAY	0.755556	0.967511	0.0479259	0.348794	0.796989	13
KEGG_NOD_LIKE_RECEPTOR_SIGNALING_PATHWAY	0.824818	0.98922	0.0400846	0.273017	0.796914	40
WP_ANGIOTENSIN_II_RECEPTOR_TYPE_1_PATHWAY	0.760062	0.969952	0.0465084	0.309036	0.796784	22
REACTOME_LEISHMANIA_INFECTION	0.905612	1	0.0292103	0.23095	0.795776	125
WP_RAS_SIGNALING	0.921053	1	0.027448	0.225416	0.794797	152
REACTOME_G_BETA_GAMMA_SIGNALLING_THROUGH_CDC42	0.764984	0.972405	0.04707	0.329991	0.794372	16
REACTOME_TETRAHYDROBIOPTERIN_BH4_SYNTHESIS_RECYCLING_SALVAGE_AND_REGULATION	0.744262	0.962458	0.0500923	0.370256	0.792969	10
WP_PERTURBATIONS_TO_HOSTCELL_AUTOPHAGY_INDUCED_BY_SARSCOV2_PROTEINS	0.769108	0.975111	0.0472587	0.323811	0.791918	18
REACTOME_RUNX2_REGULATES_OSTEOBLAST_DIFFERENTIATION	0.773083	0.97721	0.0462303	0.311025	0.79189	21
PID_IL8_CXCR2_PATHWAY	0.77709	0.979511	0.0454968	0.299803	0.790535	25
REACTOME_MATURATION_OF_SARS_COV_2_SPIKE_PROTEIN	0.824047	0.98922	0.0403295	0.276158	0.786549	36
REACTOME_NEUREXINS_AND_NEUROLIGINS	0.848266	0.995335	0.0383206	0.256386	0.786421	52
WP_MITOCHONDRIAL_BETAOXIDATION	0.767007	0.97312	0.0503964	0.396178	0.785984	8
REACTOME_UPTAKE_OF_DIETARY_COBALAMINS_INTO_ENTEROCYTES	0.778399	0.979511	0.0538979	0.50741	0.785757	3
REACTOME_GLYCOGEN_STORAGE_DISEASES	0.769841	0.975111	0.04707	0.343733	0.785425	13
REACTOME_NEGATIVE_REGULATION_OF_FLT3	0.761364	0.969952	0.0486034	0.353707	0.784977	12
REACTOME_MISCELLANEOUS_TRANSPORT_AND_BINDING_EVENTS	0.786378	0.982592	0.0449543	0.3145	0.784764	19
WP_OXIDATIVE_STRESS_RESPONSE	0.800933	0.984072	0.0443293	0.295418	0.78424	26
REACTOME_P75NTR_REGULATES_AXONOGENESIS	0.750427	0.963865	0.0516356	0.406944	0.783091	7
REACTOME_RIPK1_MEDIATED_REGULATED_NECROSIS	0.805175	0.984072	0.0431037	0.291473	0.781651	27
REACTOME_RNA_POLYMERASE_III_TRANSCRIPTION_TERMINATION	0.791345	0.982592	0.0445962	0.299734	0.780981	23
REACTOME_GROWTH_HORMONE_RECEPTOR_SIGNALING	0.795312	0.982592	0.0448645	0.310295	0.780774	20
WP_KIT_RECEPTOR_SIGNALING_PATHWAY	0.868876	0.998472	0.0370705	0.253204	0.779395	55
BIOCARTA_BCELLSURVIVAL_PATHWAY	0.781199	0.981012	0.0473534	0.337364	0.779321	14
WP_LEUKOCYTEINTRINSIC_HIPPO_PATHWAY_FUNCTIONS	0.809741	0.985175	0.0428451	0.289755	0.777045	27
REACTOME_TRANSLATION	0.980392	1	0.0192297	0.209431	0.777044	273
WP_SMALL_CELL_LUNG_CANCER	0.912517	1	0.0314929	0.236561	0.776956	88
REACTOME_INFLAMMASOMES	0.777955	0.979511	0.046882	0.329414	0.776507	15
KEGG_PRION_DISEASES	0.805947	0.984072	0.0443293	0.304893	0.776278	21
REACTOME_ENDOGENOUS_STEROLS	0.79257	0.982592	0.0445962	0.310603	0.775041	19
WP_NUCLEOTIDEBINDING_OLIGOMERIZATION_DOMAIN_NOD_PATHWAY	0.819596	0.986266	0.0432769	0.291805	0.774648	26
REACTOME_TOLL_LIKE_RECEPTOR_9_TLR9_CASCADE	0.928571	1	0.0307037	0.234484	0.774388	95
REACTOME_CYTOPROTECTION_BY_HMOX1	0.882768	0.998472	0.0353911	0.247909	0.773959	58
REACTOME_DEFECTS_IN_COBALAMIN_B12_METABOLISM	0.778325	0.979511	0.0481184	0.355172	0.773571	11
REACTOME_RND2_GTPASE_CYCLE	0.856934	0.99733	0.0383206	0.264962	0.773402	40
REACTOME_SYNAPTIC_ADHESION_LIKE_MOLECULES	0.795666	0.982592	0.0444181	0.309864	0.773196	19
REACTOME_REGULATION_OF_TP53_ACTIVITY_THROUGH_PHOSPHORYLATION	0.920592	1	0.0310618	0.235327	0.772903	88
REACTOME_PRESYNAPTIC_FUNCTION_OF_KAINATE_RECEPTORS	0.798732	0.983374	0.0453152	0.31834	0.77215	17
WP_RETINOL_METABOLISM	0.760684	0.969952	0.0510114	0.401127	0.771897	7
REACTOME_REGULATION_OF_CYTOSKELETAL_REMODELING_AND_CELL_SPREADING_BY_IPP_COMPLEX_COMPONENTS	0.789116	0.982592	0.049094	0.38894	0.771624	8
REACTOME_MAP2K_AND_MAPK_ACTIVATION	0.845706	0.995335	0.0387962	0.271154	0.770454	35
REACTOME_SYNTHESIS_OF_VERY_LONG_CHAIN_FATTY_ACYL_COAS	0.800317	0.984072	0.0452247	0.3174	0.769872	17
REACTOME_SLBP_DEPENDENT_PROCESSING_OF_REPLICATION_DEPENDENT_HISTONE_PRE_MRNAS	0.781609	0.981012	0.0479259	0.353406	0.769723	11
REACTOME_DOPAMINE_CLEARANCE_FROM_THE_SYNAPTIC_CLEFT	0.780142	0.980504	0.0515309	0.458199	0.767594	4
REACTOME_TERMINAL_PATHWAY_OF_COMPLEMENT	0.82397	0.98922	0.0515309	0.528851	0.766845	2
REACTOME_APEX1_INDEPENDENT_RESOLUTION_OF_AP_SITES_VIA_THE_SINGLE_NUCLEOTIDE_REPLACEMENT_PATHWAY	0.765812	0.972405	0.0507028	0.398367	0.766586	7
REACTOME_GABA_SYNTHESIS_RELEASE_REUPTAKE_AND_DEGRADATION	0.792332	0.982592	0.0460458	0.32511	0.766362	15
BIOCARTA_TRKA_PATHWAY	0.795455	0.982592	0.0466015	0.345223	0.766149	12
REACTOME_REGULATION_OF_BETA_CELL_DEVELOPMENT	0.833085	0.992339	0.0405756	0.280026	0.7655	29
BIOCARTA_NGF_PATHWAY	0.805071	0.984072	0.0449543	0.315505	0.765274	17
WP_TLR4_SIGNALING_AND_TOLERANCE	0.81762	0.985719	0.0431037	0.293181	0.763907	23
WP_TH17_CELL_DIFFERENTIATION_PATHWAY	0.889543	0.998472	0.0369933	0.257796	0.763634	45
REACTOME_ADRENOCEPTORS	0.780142	0.980504	0.0515309	0.455819	0.763607	4
WP_SARSCOV2_REPLICATION_ORGANELLE_FORMATION	0.777589	0.979511	0.0496901	0.408609	0.763427	6
PID_NOTCH_PATHWAY	0.889049	0.998472	0.0359969	0.247771	0.762672	55
REACTOME_TGF_BETA_RECEPTOR_SIGNALING_IN_EMT_EPITHELIAL_TO_MESENCHYMAL_TRANSITION	0.805994	0.984072	0.0446854	0.316329	0.761485	16
REACTOME_MUSCARINIC_ACETYLCHOLINE_RECEPTORS	0.84913	0.995335	0.0516356	0.569784	0.760363	1
WP_GASTRIC_CANCER_NETWORK_2	0.836066	0.993291	0.0404114	0.278146	0.760361	29
REACTOME_CELL_CYCLE_CHECKPOINTS	0.983815	1	0.0191547	0.206009	0.760301	250
SA_PTEN_PATHWAY	0.807571	0.984072	0.0445962	0.315712	0.759999	16
REACTOME_DUAL_INCISION_IN_GG_NER	0.875912	0.998472	0.037303	0.258256	0.759319	41
REACTOME_CREB_PHOSPHORYLATION	0.786325	0.982592	0.0494905	0.394544	0.75923	7
REACTOME_SCAVENGING_OF_HEME_FROM_PLASMA	0.785461	0.982592	0.0512184	0.452751	0.758467	4
REACTOME_ACETYLCHOLINE_REGULATES_INSULIN_SECRETION	0.80102	0.984072	0.0484088	0.382281	0.758415	8
REACTOME_COMPLEX_I_BIOGENESIS	0.890449	0.998472	0.0347157	0.243165	0.757834	57
WP_MAMMARY_GLAND_DEVELOPMENT_PATHWAY_PREGNANCY_AND_LACTATION_STAGE_3_OF_4	0.842924	0.995335	0.0419926	0.285058	0.756736	26
REACTOME_PYRIMIDINE_SALVAGE	0.794069	0.982592	0.0473534	0.366451	0.756603	9
BIOCARTA_CARM1_PATHWAY	0.804598	0.984072	0.0466015	0.347299	0.756423	11
BIOCARTA_DEATH_PATHWAY	0.843227	0.995335	0.0409884	0.281844	0.755829	27
WP_REGULATORY_CIRCUITS_OF_THE_STAT3_SIGNALING_PATHWAY	0.899718	1	0.0344919	0.242023	0.755584	58
REACTOME_CYTOCHROME_P450_ARRANGED_BY_SUBSTRATE_TYPE	0.846498	0.995335	0.0398407	0.275571	0.753324	29
REACTOME_TRANSPORT_OF_RCBL_WITHIN_THE_BODY	0.793162	0.982592	0.049094	0.391306	0.752998	7
WP_IRON_METABOLISM_IN_PLACENTA	0.799012	0.983374	0.04707	0.36425	0.75206	9
PID_TOLL_ENDOGENOUS_PATHWAY	0.817891	0.985719	0.0445962	0.318869	0.751652	15
REACTOME_SIGNALING_BY_CSF1_M_CSF_IN_MYELOID_CELLS	0.8507	0.995335	0.0415718	0.283063	0.751439	26
WP_MAJOR_RECEPTORS_TARGETED_BY_EPINEPHRINE_AND_NOREPINEPHRINE	0.818182	0.985719	0.0453152	0.338319	0.750826	12
PID_FAS_PATHWAY	0.881232	0.998472	0.0372254	0.263257	0.749805	36
REACTOME_PROCESSIVE_SYNTHESIS_ON_THE_LAGGING_STRAND	0.819489	0.986266	0.0445071	0.31805	0.749719	15
WP_VITAMIN_B12_DISORDERS	0.802306	0.984072	0.046882	0.36296	0.749397	9
BIOCARTA_G2_PATHWAY	0.84	0.995335	0.0416557	0.285412	0.749279	24
WP_EFFECT_OF_PROGERIN_ON_GENES_INVOLVED_IN_HUTCHINSONGILFORD_PROGERIA_SYNDROME	0.835913	0.993291	0.0421619	0.290006	0.747719	22
KEGG_ALANINE_ASPARTATE_AND_GLUTAMATE_METABOLISM	0.840557	0.995335	0.0419082	0.289804	0.747198	22
WP_SYNTHESIS_OF_CERAMIDES_AND_1DEOXYCERAMIDES	0.840557	0.995335	0.0419082	0.29907	0.746263	19
REACTOME_ZINC_EFFLUX_AND_COMPARTMENTALIZATION_BY_THE_SLC30_FAMILY	0.844569	0.995335	0.0503964	0.514588	0.746163	2
REACTOME_PENTOSE_PHOSPHATE_PATHWAY	0.826984	0.990133	0.0438002	0.326543	0.746147	13
REACTOME_NEUROTRANSMITTER_CLEARANCE	0.809524	0.985175	0.0479259	0.375476	0.744913	8
WP_CHOLESTEROL_BIOSYNTHESIS_PATHWAY	0.827476	0.990337	0.044064	0.31599	0.744863	15
WP_PLURIPOTENT_STEM_CELL_DIFFERENTIATION_PATHWAY	0.873156	0.998472	0.0379271	0.270162	0.744293	30
REACTOME_ASPARTATE_AND_ASPARAGINE_METABOLISM	0.806557	0.984072	0.0464155	0.347452	0.744131	10
REACTOME_RUNX3_REGULATES_BCL2L11_BIM_TRANSCRIPTION	0.817376	0.985719	0.049391	0.444009	0.743822	4
WP_ANGIOGENESIS	0.850077	0.995335	0.041321	0.285259	0.743266	23
REACTOME_INTERCONVERSION_OF_NUCLEOTIDE_DI_AND_TRIPHOSPHATES	0.865872	0.998472	0.0387962	0.271699	0.742738	29
BIOCARTA_GRANULOCYTES_PATHWAY	0.846442	0.995335	0.0502948	0.512051	0.742483	2
REACTOME_GLUTAMATE_NEUROTRANSMITTER_RELEASE_CYCLE	0.850077	0.995335	0.041321	0.284686	0.741774	23
REACTOME_INTRA_GOLGI_AND_RETROGRADE_GOLGI_TO_ER_TRAFFIC	0.982927	1	0.0224414	0.205665	0.738652	188
PID_FAK_PATHWAY	0.919492	1	0.0334562	0.236267	0.737614	58
WP_FATTY_ACID_TRANSPORTERS	0.822076	0.988398	0.0457704	0.356599	0.736263	9
WP_MITOCHONDRIAL_GENE_EXPRESSION	0.851393	0.995768	0.041321	0.29499	0.736083	19
REACTOME_SERINE_BIOSYNTHESIS	0.816327	0.985528	0.0475434	0.370847	0.735731	8
BIOCARTA_NUCLEARRS_PATHWAY	0.837061	0.993707	0.0435378	0.311904	0.735232	15
WP_NUCLEAR_RECEPTORS_IN_LIPID_METABOLISM_AND_TOXICITY	0.837061	0.993707	0.0435378	0.311904	0.735232	15
REACTOME_SYNTHESIS_OF_IP3_AND_IP4_IN_THE_CYTOSOL	0.862442	0.998472	0.0406579	0.282085	0.734995	23
WP_ANTIVIRAL_AND_ANTIINFLAMMATORY_EFFECTS_OF_NRF2_ON_SARSCOV2_PATHWAY	0.852941	0.996441	0.0412376	0.294521	0.734912	19
REACTOME_PROSTANOID_LIGAND_RECEPTORS	0.887814	0.998472	0.0495902	0.550681	0.734869	1
BIOCARTA_AGPCR_PATHWAY	0.808197	0.984072	0.0463228	0.342639	0.733824	10
WP_CONVERSION_OF_ANGIOTENSINOGEN_TO_ANGIOTENSIN_II	0.889749	0.998472	0.0494905	0.549746	0.733622	1
REACTOME_GLYCEROPHOSPHOLIPID_CATABOLISM	0.808149	0.984072	0.0479259	0.39219	0.732751	6
WP_LET7_INHIBITION_OF_ES_CELL_REPROGRAMMING	0.808149	0.984072	0.0479259	0.39193	0.732264	6
REACTOME_SIGNALING_BY_NOTCH1_HD_DOMAIN_MUTANTS_IN_CANCER	0.845048	0.995335	0.0431037	0.310465	0.731841	15
WP_INTERLEUKIN1_IL1_STRUCTURAL_PATHWAY	0.920863	1	0.0342688	0.242266	0.731801	48
WP_UREA_CYCLE_AND_METABOLISM_OF_AMINO_GROUPS	0.850318	0.995335	0.0426734	0.299175	0.731667	18
REACTOME_NUCLEOTIDE_BINDING_DOMAIN_LEUCINE_RICH_REPEAT_CONTAINING_RECEPTOR_NLR_SIGNALING_PATHWAYS	0.922302	1	0.0341946	0.241188	0.728542	48
REACTOME_TRANSPORT_OF_NUCLEOTIDE_SUGARS	0.83196	0.992339	0.0452247	0.352796	0.728411	9
KEGG_HOMOLOGOUS_RECOMBINATION	0.881279	0.998472	0.0389556	0.271558	0.728244	27
WP_PROSTAGLANDIN_SIGNALING	0.814754	0.985528	0.0459538	0.339552	0.727211	10
REACTOME_COHESIN_LOADING_ONTO_CHROMATIN	0.816393	0.985528	0.045862	0.339478	0.727052	10
REACTOME_PINK1_PRKN_MEDIATED_MITOPHAGY	0.859133	0.997961	0.0409056	0.281838	0.72666	22
BIOCARTA_INTEGRIN_PATHWAY	0.888563	0.998472	0.036839	0.260223	0.726264	32
WP_CCL18_SIGNALING_PATHWAY	0.906205	1	0.0351652	0.251338	0.725793	38
BIOCARTA_MET_PATHWAY	0.899705	1	0.0365315	0.262444	0.725778	31
REACTOME_SIGNALING_BY_ERBB2	0.929088	1	0.0341205	0.241825	0.725546	47
REACTOME_SIGNALING_BY_PDGFR_IN_DISEASE	0.868421	0.998472	0.0404114	0.290611	0.725155	19
WP_SREBF_AND_MIR33_IN_CHOLESTEROL_AND_LIPID_HOMEOSTASIS	0.861199	0.998472	0.0416557	0.300794	0.724088	16
KEGG_CYTOSOLIC_DNA_SENSING_PATHWAY	0.888025	0.998472	0.0395979	0.272539	0.723503	26
KEGG_TOLL_LIKE_RECEPTOR_SIGNALING_PATHWAY	0.942693	1	0.0329431	0.231541	0.722568	60
WP_IMMUNE_INFILTRATION_IN_PANCREATIC_CANCER	0.849026	0.995335	0.0436251	0.32537	0.722088	12
REACTOME_ZINC_TRANSPORTERS	0.827869	0.990423	0.0452247	0.337032	0.721815	10
REACTOME_REPRESSION_OF_WNT_TARGET_GENES	0.850649	0.995335	0.0435378	0.324532	0.720228	12
WP_NONGENOMIC_ACTIONS_OF_125_DIHYDROXYVITAMIN_D3	0.936782	1	0.0333827	0.233979	0.720189	54
WP_ENERGY_METABOLISM	0.92489	1	0.0351652	0.243103	0.720109	45
WP_ENVELOPE_PROTEINS_AND_THEIR_POTENTIAL_ROLES_IN_EDMD_PHYSIOPATHOLOGY	0.928779	1	0.0343431	0.244108	0.719985	42
REACTOME_EGFR_DOWNREGULATION	0.892691	1	0.0393562	0.271096	0.719672	26
REACTOME_FGFR3_LIGAND_BINDING_AND_ACTIVATION	0.82526	0.98922	0.04783	0.406291	0.71831	5
REACTOME_ATF6_ATF6_ALPHA_ACTIVATES_CHAPERONES	0.852273	0.996419	0.0434507	0.323556	0.718063	12
WP_TOLLLIKE_RECEPTOR_SIGNALING_PATHWAY	0.945869	1	0.0325058	0.228906	0.717344	61
KEGG_AMINOACYL_TRNA_BIOSYNTHESIS	0.869969	0.998472	0.0403295	0.278221	0.717334	22
REACTOME_CYCLIN_A_B1_B2_ASSOCIATED_EVENTS_DURING_G2_M_TRANSITION	0.894737	1	0.0390355	0.271814	0.716733	25
PID_CD40_PATHWAY	0.900467	1	0.0389556	0.269712	0.715999	26
BIOCARTA_CBL_PATHWAY	0.86039	0.997961	0.0430173	0.322047	0.714714	12
REACTOME_MEIOSIS	0.93343	1	0.0338984	0.238097	0.714361	47
WP_ARYL_HYDROCARBON_RECEPTOR_PATHWAY_WP2873	0.903577	1	0.0387962	0.268932	0.713926	26
BIOCARTA_MSP_PATHWAY	0.8473	0.995335	0.0499914	0.460404	0.712965	3
WP_REGUCALCIN_IN_PROXIMAL_TUBULE_EPITHELIAL_KIDNEY_CELLS	0.905132	1	0.0387167	0.268526	0.712849	26
REACTOME_BETA_OXIDATION_OF_BUTANOYL_COA_TO_ACETYL_COA	0.849291	0.995335	0.0476387	0.425217	0.712342	4
REACTOME_DEGRADATION_OF_CYSTEINE_AND_HOMOCYSTEINE	0.876823	0.998472	0.0420772	0.308113	0.711752	14
REACTOME_DNA_DAMAGE_BYPASS	0.939219	1	0.0336033	0.236163	0.708559	47
REACTOME_APOPTOTIC_FACTOR_MEDIATED_RESPONSE	0.882726	0.998472	0.0407404	0.292051	0.708384	17
REACTOME_PROCESSIVE_SYNTHESIS_ON_THE_C_STRAND_OF_THE_TELOMERE	0.882353	0.998472	0.0396787	0.283468	0.707332	19
REACTOME_MITOPHAGY	0.907601	1	0.0366082	0.258492	0.706635	29
WP_MITOCHONDRIAL_LONG_CHAIN_FATTY_ACID_BETAOXIDATION	0.876997	0.998472	0.0414044	0.299589	0.706204	15
REACTOME_VEGF_LIGAND_RECEPTOR_INTERACTIONS	0.840136	0.995335	0.0462303	0.355683	0.705647	8
REACTOME_RHO_GTPASES_ACTIVATE_CIT	0.885449	0.998472	0.0395172	0.282411	0.704694	19
REACTOME_PROCESSING_OF_CAPPED_INTRONLESS_PRE_MRNA	0.909091	1	0.0365315	0.257728	0.704546	29
REACTOME_CTLA4_INHIBITORY_SIGNALING	0.895404	1	0.0400846	0.289553	0.702326	17
REACTOME_CLATHRIN_MEDIATED_ENDOCYTOSIS	0.991003	1	0.0249197	0.20332	0.702069	130
REACTOME_CALCITONIN_LIKE_LIGAND_RECEPTORS	0.845501	0.995335	0.045862	0.374955	0.700548	6
REACTOME_AQUAPORIN_MEDIATED_TRANSPORT	0.923521	1	0.0342688	0.246643	0.6996	34
REACTOME_ADRENALINE_NORADRENALINE_INHIBITS_INSULIN_SECRETION	0.896923	1	0.0386372	0.265981	0.698269	24
REACTOME_DEFECTIVE_RIPK1_MEDIATED_REGULATED_NECROSIS	0.859929	0.997961	0.04707	0.416625	0.697948	4
BIOCARTA_PLK3_PATHWAY	0.853741	0.996455	0.0454968	0.351523	0.697393	8
BIOCARTA_RB_PATHWAY	0.879365	0.998472	0.0409884	0.305113	0.69718	13
PID_CIRCADIAN_PATHWAY	0.888169	0.998472	0.041488	0.3016	0.696707	14
REACTOME_MET_RECEPTOR_RECYCLING	0.85832	0.997813	0.0438002	0.337144	0.696094	9
WP_NEPHROGENESIS	0.879365	0.998472	0.0409884	0.304531	0.695849	13
REACTOME_HYALURONAN_BIOSYNTHESIS_AND_EXPORT	0.856611	0.99733	0.0494905	0.449236	0.69567	3
REACTOME_VASOPRESSIN_REGULATES_RENAL_WATER_HOMEOSTASIS_VIA_AQUAPORINS	0.932551	1	0.0345664	0.247775	0.694978	33
REACTOME_INTERLEUKIN_36_PATHWAY	0.885768	0.998472	0.048215	0.479069	0.694659	2
WP_CORTICOTROPINRELEASING_HORMONE_SIGNALING_PATHWAY	0.980743	1	0.0289981	0.21571	0.694402	75
WP_CANONICAL_AND_NONCANONICAL_NOTCH_SIGNALING	0.928463	1	0.0365315	0.258813	0.694066	27
REACTOME_DAG_AND_IP3_SIGNALING	0.951079	1	0.0327242	0.238465	0.693887	39
REACTOME_NRCAM_INTERACTIONS	0.85812	0.997813	0.0454968	0.360066	0.692882	7
REACTOME_RESOLUTION_OF_ABASIC_SITES_AP_SITES	0.938865	1	0.0338984	0.241188	0.690692	37
REACTOME_RECOGNITION_AND_ASSOCIATION_OF_DNA_GLYCOSYLASE_WITH_SITE_CONTAINING_AN_AFFECTED_PURINE	0.863934	0.998472	0.0432769	0.321706	0.688991	10
REACTOME_CITRIC_ACID_CYCLE_TCA_CYCLE	0.905573	1	0.0384787	0.266491	0.68709	22
WP_TRANSSULFURATION_PATHWAY	0.867213	0.998472	0.0431037	0.320257	0.685887	10
REACTOME_ENERGY_DEPENDENT_REGULATION_OF_MTOR_BY_LKB1_AMPK	0.938066	1	0.0356933	0.253203	0.684829	28
REACTOME_TP53_REGULATES_METABOLIC_GENES	0.979812	1	0.0279403	0.208652	0.683139	85
WP_NONALCOHOLIC_FATTY_LIVER_DISEASE	0.996173	1	0.0242154	0.196544	0.683083	135
REACTOME_HDR_THROUGH_SINGLE_STRAND_ANNEALING_SSA	0.951613	1	0.0336033	0.239736	0.682813	36
WP_RESISTIN_AS_A_REGULATOR_OF_INFLAMMATION	0.937792	1	0.0370705	0.25712	0.682571	26
BIOCARTA_MPR_PATHWAY	0.905573	1	0.0384787	0.273052	0.681342	19
BIOCARTA_AMAN_PATHWAY	0.88474	0.998472	0.0417397	0.306821	0.680923	12
REACTOME_REACTIONS_SPECIFIC_TO_THE_COMPLEX_N_GLYCAN_SYNTHESIS_PATHWAY	0.868376	0.998472	0.0449543	0.353193	0.679657	7
WP_TRANSLATION_INHIBITORS_IN_CHRONICALLY_ACTIVATED_PDGFRA_CELLS	0.967599	1	0.0330163	0.228495	0.67684	45
WP_OXIDATIVE_PHOSPHORYLATION	0.97037	1	0.0331626	0.229356	0.676294	44
WP_LEUCINE_ISOLEUCINE_AND_VALINE_METABOLISM	0.918083	1	0.0377705	0.259322	0.675685	23
REACTOME_INSULIN_PROCESSING	0.914861	1	0.0380056	0.262025	0.675577	22
WP_DOPAMINE_METABOLISM	0.878689	0.998472	0.0425023	0.314882	0.674376	10
BIOCARTA_CELL2CELL_PATHWAY	0.878689	0.998472	0.0425023	0.314738	0.674067	10
REACTOME_BUDDING_AND_MATURATION_OF_HIV_VIRION	0.944109	1	0.0353911	0.249181	0.673951	28
REACTOME_METABOLISM_OF_NITRIC_OXIDE_NOS3_ACTIVATION_AND_REGULATION	0.9141	1	0.0401661	0.291644	0.673708	14
REACTOME_DEFECTIVE_F9_ACTIVATION	0.998066	1	0.0442407	0.50406	0.672656	1
WP_IL17_SIGNALING_PATHWAY	0.942457	1	0.036839	0.253265	0.672337	26
REACTOME_ENOS_ACTIVATION	0.881967	0.998472	0.0423318	0.313754	0.67196	10
REACTOME_TRANSLATION_OF_SARS_COV_2_STRUCTURAL_PROTEINS	0.968661	1	0.031349	0.216919	0.671769	56
WP_BDNFTRKB_SIGNALING	0.954277	1	0.0337507	0.243728	0.671467	30
PID_VEGF_VEGFR_PATHWAY	0.881967	0.998472	0.0423318	0.313501	0.671418	10
REACTOME_LISTERIA_MONOCYTOGENES_ENTRY_INTO_HOST_CELLS	0.921875	1	0.0380842	0.266248	0.669942	20
BIOCARTA_CPSF_PATHWAY	0.883607	0.998472	0.0422468	0.312711	0.669727	10
PID_IL12_2PATHWAY	0.958944	1	0.0332359	0.23987	0.669461	32
BIOCARTA_NOS1_PATHWAY	0.924149	1	0.0375363	0.267858	0.668379	19
BIOCARTA_EDG1_PATHWAY	0.924149	1	0.0375363	0.267775	0.668172	19
REACTOME_E2F_ENABLED_INHIBITION_OF_PRE_REPLICATION_COMPLEX_FORMATION	0.894563	1	0.0419082	0.323347	0.667609	9
BIOCARTA_RANKL_PATHWAY	0.886364	0.998472	0.0416557	0.300712	0.667366	12
REACTOME_TRAF6_MEDIATED_IRF7_ACTIVATION_IN_TLR7_8_OR_9_SIGNALING	0.89491	1	0.0417397	0.305313	0.664976	11
REACTOME_FORMYL_PEPTIDE_RECEPTORS_BIND_FORMYL_PEPTIDES_AND_MANY_OTHER_LIGANDS	0.875233	0.998472	0.048506	0.429369	0.664904	3
REACTOME_REGULATION_OF_IFNG_SIGNALING	0.907937	1	0.0395172	0.290982	0.664889	13
WP_PPAR_SIGNALING_PATHWAY	0.975182	1	0.0322153	0.227281	0.663417	40
BIOCARTA_SHH_PATHWAY	0.91853	1	0.0392759	0.281152	0.662743	15
BIOCARTA_IL10_PATHWAY	0.903061	1	0.0429311	0.333999	0.662628	8
WP_CREATINE_PATHWAY	0.877163	0.998472	0.0450443	0.374557	0.662206	5
PID_ER_NONGENOMIC_PATHWAY	0.967742	1	0.0327971	0.232307	0.661654	36
REACTOME_INWARDLY_RECTIFYING_K_CHANNELS	0.945568	1	0.036685	0.248931	0.660831	26
REACTOME_TRANSCRIPTIONAL_ACTIVATION_OF_MITOCHONDRIAL_BIOGENESIS	0.96719	1	0.0314929	0.214193	0.660154	53
PID_PI3K_PLC_TRK_PATHWAY	0.956332	1	0.0330163	0.232174	0.659699	35
BIOCARTA_EPHA4_PATHWAY	0.887179	0.998472	0.0439759	0.342712	0.659488	7
REACTOME_TRNA_MODIFICATION_IN_THE_MITOCHONDRION	0.906463	1	0.0427591	0.332299	0.659254	8
REACTOME_HDR_THROUGH_HOMOLOGOUS_RECOMBINATION_HRR	0.990155	1	0.0296355	0.207668	0.65899	67
KEGG_AMYOTROPHIC_LATERAL_SCLEROSIS_ALS	0.971056	1	0.031998	0.219499	0.658561	47
REACTOME_VLDLR_INTERNALISATION_AND_DEGRADATION	0.921136	1	0.0385579	0.273249	0.657779	16
REACTOME_GPER1_SIGNALING	0.96361	1	0.0326513	0.229389	0.656906	37
WP_NIPBL_ROLE_IN_DNA_DAMAGE_CORNELIA_DE_LANGE_SYNDROME	0.888889	0.998472	0.043888	0.340834	0.655875	7
REACTOME_NOTCH2_INTRACELLULAR_DOMAIN_REGULATES_TRANSCRIPTION	0.890164	0.998472	0.0419082	0.306237	0.655861	10
REACTOME_LAGGING_STRAND_SYNTHESIS	0.93125	1	0.0376143	0.259747	0.653584	20
PID_SMAD2_3PATHWAY	0.927445	1	0.0382417	0.271025	0.652426	16
REACTOME_SIGNAL_TRANSDUCTION_BY_L1	0.93125	1	0.0376143	0.259267	0.652375	20
WP_BMP2WNT4FOXO1_PATHWAY_IN_PRIMARY_ENDOMETRIAL_STROMAL_CELL_DIFFERENTIATION	0.920635	1	0.0388759	0.285211	0.651703	13
REACTOME_RECOGNITION_OF_DNA_DAMAGE_BY_PCNA_CONTAINING_REPLICATION_COMPLEX	0.966077	1	0.0331626	0.236194	0.650711	30
WP_TRANSCRIPTION_FACTORS_REGULATE_MIRNAS_RELATED_TO_CARDIAC_HYPERTROPHY	0.914966	1	0.0423318	0.327871	0.650469	8
PID_NFKAPPAB_ATYPICAL_PATHWAY	0.936791	1	0.0390355	0.281411	0.650069	14
WP_ARYL_HYDROCARBON_RECEPTOR_PATHWAY_WP2586	0.970888	1	0.0322878	0.226885	0.649734	37
REACTOME_MISMATCH_REPAIR	0.934505	1	0.0384787	0.275593	0.649638	15
REACTOME_PTK6_REGULATES_RTKS_AND_THEIR_EFFECTORS_AKT1_AND_DOK1	0.906096	1	0.041321	0.31459	0.649528	9
WP_BASE_EXCISION_REPAIR	0.979351	1	0.0325058	0.234299	0.647945	31
WP_TRIACYLGLYCERIDE_SYNTHESIS	0.942675	1	0.0379271	0.264424	0.646679	18
REACTOME_IRAK1_RECRUITS_IKK_COMPLEX	0.940032	1	0.0388759	0.279495	0.645644	14
WP_MITOCHONDRIAL_COMPLEX_III_ASSEMBLY	0.936909	1	0.0377705	0.26767	0.64435	16
WP_ETHANOL_METABOLISM_PRODUCTION_OF_ROS_BY_CYP2E1	0.920068	1	0.0420772	0.324556	0.643892	8
BIOCARTA_PPARA_PATHWAY	0.983824	1	0.0321428	0.216042	0.643087	46
REACTOME_FOXO_MEDIATED_TRANSCRIPTION_OF_CELL_CYCLE_GENES	0.940063	1	0.0376143	0.267094	0.642964	16
REACTOME_ACTIVATION_OF_RAC1	0.931746	1	0.0383206	0.280898	0.641849	13
REACTOME_N_GLYCAN_TRIMMING_AND_ELONGATION_IN_THE_CIS_GOLGI	0.894464	1	0.0441523	0.362937	0.641663	5
REACTOME_DOWNREGULATION_OF_SMAD2_3_SMAD4_TRANSCRIPTIONAL_ACTIVITY	0.967552	1	0.0330894	0.232789	0.64133	30
REACTOME_ROLE_OF_ABL_IN_ROBO_SLIT_SIGNALING	0.92517	1	0.0418239	0.32306	0.640925	8
REACTOME_FOXO_MEDIATED_TRANSCRIPTION_OF_OXIDATIVE_STRESS_METABOLIC_AND_NEURONAL_GENES	0.964006	1	0.036073	0.251279	0.639772	21
KEGG_BASE_EXCISION_REPAIR	0.973607	1	0.0325058	0.227868	0.639141	33
REACTOME_SIGNALING_BY_EGFR	0.985272	1	0.0321428	0.214706	0.635994	45
WP_OSTEOPONTIN_SIGNALING	0.931034	1	0.0399219	0.291669	0.635259	11
REACTOME_CHEMOKINE_RECEPTORS_BIND_CHEMOKINES	0.920923	1	0.0405756	0.307624	0.635146	9
WP_INTERACTIONS_BETWEEN_IMMUNE_CELLS_AND_MICRORNAS_IN_TUMOR_MICROENVIRONMENT	0.951378	1	0.0383206	0.274204	0.63342	14
REACTOME_NR1H3_NR1H2_REGULATE_GENE_EXPRESSION_LINKED_TO_CHOLESTEROL_TRANSPORT_AND_EFFLUX	0.988201	1	0.0320704	0.227931	0.630335	31
REACTOME_NEF_AND_SIGNAL_TRANSDUCTION	0.901528	1	0.0429311	0.33722	0.630047	6
REACTOME_RETROGRADE_NEUROTROPHIN_SIGNALLING	0.94127	1	0.0378488	0.2748	0.627914	13
REACTOME_ERBB2_REGULATES_CELL_MOTILITY	0.94127	1	0.0378488	0.274441	0.627095	13
WP_HEPATOCYTE_GROWTH_FACTOR_RECEPTOR_SIGNALING	0.980938	1	0.0321428	0.223023	0.625551	33
PID_THROMBIN_PAR4_PATHWAY	0.935961	1	0.0396787	0.286302	0.62357	11
REACTOME_NR1H2_NR1H3_REGULATE_GENE_EXPRESSION_LINKED_TO_GLUCONEOGENESIS	0.913121	1	0.0443293	0.371344	0.622091	4
REACTOME_PTK6_PROMOTES_HIF1A_STABILIZATION	0.911765	1	0.0432769	0.351854	0.622068	5
REACTOME_GAB1_SIGNALOSOME	0.931818	1	0.0393562	0.280204	0.621853	12
WP_VALPROIC_ACID_PATHWAY	0.931973	1	0.041488	0.312691	0.620353	8
WP_METHIONINE_METABOLISM_LEADING_TO_SULFUR_AMINO_ACIDS_AND_RELATED_DISORDERS	0.931973	1	0.041488	0.312111	0.619203	8
PID_AR_PATHWAY	0.992978	1	0.0294228	0.19858	0.618882	57
WP_VITAMIN_K_METABOLISM_AND_ACTIVATION_OF_DEPENDENT_PROTEINS	0.91453	1	0.0425878	0.321009	0.617725	7
REACTOME_ENDOSOMAL_SORTING_COMPLEX_REQUIRED_FOR_TRANSPORT_ESCRT	0.99115	1	0.0319257	0.222319	0.614816	31
REACTOME_SYNTHESIS_OF_DIPHTHAMIDE_EEF2	0.935374	1	0.041321	0.309526	0.614075	8
BIOCARTA_UCALPAIN_PATHWAY	0.935961	1	0.0396787	0.280983	0.611985	11
REACTOME_SYNTHESIS_OF_PE	0.935961	1	0.0396787	0.280808	0.611606	11
REACTOME_STAT3_NUCLEAR_EVENTS_DOWNSTREAM_OF_ALK_SIGNALING	0.935374	1	0.041321	0.308275	0.611593	8
REACTOME_AMINO_ACIDS_REGULATE_MTORC1	0.988439	1	0.0310618	0.199297	0.61131	52
BIOCARTA_CB1R_PATHWAY	0.922145	1	0.0427591	0.344656	0.609341	5
BIOCARTA_TID_PATHWAY	0.971246	1	0.036685	0.258116	0.608441	15
REACTOME_LEUKOTRIENE_RECEPTORS	0.938202	1	0.0455878	0.418695	0.607116	2
REACTOME_JNK_C_JUN_KINASES_PHOSPHORYLATION_AND_ACTIVATION_MEDIATED_BY_ACTIVATED_HUMAN_TAK1	0.978091	1	0.0353911	0.238215	0.606512	21
REACTOME_HOMOLOGY_DIRECTED_REPAIR	1	1	0.0254821	0.180778	0.606045	103
REACTOME_RESOLUTION_OF_AP_SITES_VIA_THE_MULTIPLE_NUCLEOTIDE_PATCH_REPLACEMENT_PATHWAY	0.983077	1	0.0343431	0.228649	0.600261	24
WP_OSTEOBLAST_SIGNALING	0.928693	1	0.0415718	0.318772	0.595578	6
REACTOME_CROSS_PRESENTATION_OF_PARTICULATE_EXOGENOUS_ANTIGENS_PHAGOSOMES	0.941489	1	0.0429311	0.354456	0.593799	4
KEGG_N_GLYCAN_BIOSYNTHESIS	0.994118	1	0.031637	0.199351	0.593404	46
REACTOME_MYOCLONIC_EPILEPSY_OF_LAFORA	0.943878	1	0.0409056	0.297848	0.590906	8
BIOCARTA_NFKB_PATHWAY	0.980892	1	0.036073	0.241617	0.590902	18
REACTOME_NR1H2_AND_NR1H3_MEDIATED_SIGNALING	0.992669	1	0.0315649	0.207459	0.590882	36
REACTOME_P38MAPK_EVENTS	0.961905	1	0.036839	0.257814	0.589102	13
REACTOME_CLASS_B_2_SECRETIN_FAMILY_RECEPTORS	0.992775	1	0.0308468	0.191894	0.588602	52
KEGG_ACUTE_MYELOID_LEUKEMIA	0.998559	1	0.0304181	0.191191	0.588511	55
BIOCARTA_IFNA_PATHWAY	0.929915	1	0.0418239	0.305807	0.588472	7
WP_ATM_SIGNALING_IN_DEVELOPMENT_AND_DISEASE	0.994074	1	0.031998	0.199041	0.586906	44
WP_MIR517_RELATIONSHIP_WITH_ARCN1_AND_USP1	0.939446	1	0.0419082	0.330577	0.584451	5
REACTOME_TRANSLESION_SYNTHESIS_BY_Y_FAMILY_DNA_POLYMERASES_BYPASSES_LESIONS_ON_DNA_TEMPLATE	0.997114	1	0.0305608	0.201579	0.582104	38
WP_MAMMALIAN_DISORDER_OF_SEXUAL_DEVELOPMENT	0.980831	1	0.0362255	0.246124	0.580174	15
REACTOME_PREVENTION_OF_PHAGOSOMAL_LYSOSOMAL_FUSION	0.948929	1	0.0391956	0.280932	0.580035	9
WP_PHOTODYNAMIC_THERAPYINDUCED_NFKB_SURVIVAL_SIGNALING	0.970313	1	0.0356933	0.230005	0.578746	20
REACTOME_PROCESSING_AND_ACTIVATION_OF_SUMO	0.947541	1	0.0390355	0.269508	0.5772	10
REACTOME_METABOLISM_OF_INGESTED_SEMET_SEC_MESEC_INTO_H2SE	0.945671	1	0.0407404	0.308587	0.576551	6
REACTOME_TRANSCRIPTIONAL_ACTIVITY_OF_SMAD2_SMAD3_SMAD4_HETEROTRIMER	0.997147	1	0.0299907	0.188818	0.575508	50
REACTOME_SEROTONIN_AND_MELATONIN_BIOSYNTHESIS	0.955056	1	0.0447749	0.39571	0.573787	2
BIOCARTA_CIRCADIAN_PATHWAY	0.946367	1	0.0415718	0.324487	0.573684	5
WP_IL1_SIGNALING_PATHWAY	0.995665	1	0.0307037	0.186351	0.571601	52
REACTOME_NUCLEAR_EVENTS_STIMULATED_BY_ALK_SIGNALING_IN_CANCER	0.988854	1	0.0356933	0.233575	0.571234	18
WP_PENTOSE_PHOSPHATE_PATHWAY_IN_SENESCENT_CELLS	0.94188	1	0.0412376	0.296781	0.571101	7
REACTOME_PROCESSING_OF_DNA_DOUBLE_STRAND_BREAK_ENDS	0.99572	1	0.0300618	0.181863	0.570802	62
REACTOME_GAP_FILLING_DNA_REPAIR_SYNTHESIS_AND_LIGATION_IN_GG_NER	0.99226	1	0.0341946	0.216367	0.570527	25
REACTOME_SIGNALING_BY_ACTIVIN	0.950739	1	0.0389556	0.26096	0.568376	11
WP_PARKINSONS_DISEASE_PATHWAY	0.997114	1	0.0305608	0.199228	0.565108	34
WP_CELL_INTERACTIONS_OF_THE_PANCREATIC_CANCER_MICROENVIRONMENT	0.97731	1	0.0370705	0.244577	0.564982	14
PID_IL1_PATHWAY	0.992447	1	0.0330163	0.208166	0.56302	28
REACTOME_APC_C_CDC20_MEDIATED_DEGRADATION_OF_CYCLIN_B	0.990769	1	0.0339724	0.213651	0.560889	24
REACTOME_ACTIVATED_NTRK2_SIGNALS_THROUGH_FYN	0.955556	1	0.0405756	0.291027	0.56003	7
WP_MIR124_PREDICTED_INTERACTIONS_WITH_CELL_CYCLE_AND_DIFFERENTIATION	0.960951	1	0.0400032	0.293128	0.547666	6
KEGG_MISMATCH_REPAIR	0.993808	1	0.0341205	0.211758	0.545973	22
REACTOME_MAP3K8_TPL2_DEPENDENT_MAPK1_3_ACTIVATION	0.984227	1	0.0354665	0.225774	0.543494	16
WP_MINERALOCORTICOID_BIOSYNTHESIS	0.964618	1	0.044064	0.350642	0.54299	3
REACTOME_POST_TRANSCRIPTIONAL_SILENCING_BY_SMALL_RNAS	0.964103	1	0.0401661	0.281988	0.542636	7
REACTOME_DISINHIBITION_OF_SNARE_FORMATION	0.970588	1	0.0404114	0.303465	0.536516	5
REACTOME_SEMA3A_PLEXIN_REPULSION_SIGNALING_BY_INHIBITING_INTEGRIN_ADHESION	0.991896	1	0.0363783	0.23157	0.534935	14
REACTOME_REGULATION_OF_PTEN_MRNA_TRANSLATION	0.970346	1	0.0381629	0.256887	0.530389	9
REACTOME_TFAP2A_ACTS_AS_A_TRANSCRIPTIONAL_REPRESSOR_DURING_RETINOIC_ACID_INDUCED_CELL_DIFFERENTIATION	0.970588	1	0.0404114	0.299231	0.529031	5
REACTOME_NTRK2_ACTIVATES_RAC1	0.970588	1	0.0404114	0.299075	0.528755	5
WP_SEROTONIN_AND_ANXIETYRELATED_EVENTS	0.969388	1	0.0396787	0.265923	0.527569	8
WP_ESTROGEN_RECEPTOR_PATHWAY	0.977778	1	0.0395172	0.272675	0.524714	7
SA_REG_CASCADE_OF_CYCLIN_EXPR	0.975369	1	0.0377705	0.23996	0.522637	11
REACTOME_GABA_RECEPTOR_ACTIVATION	0.99854	1	0.0310618	0.175073	0.515936	43
REACTOME_NR1H2_NR1H3_REGULATE_GENE_EXPRESSION_LINKED_TO_LIPOGENESIS	0.972789	1	0.0395172	0.259947	0.515713	8
REACTOME_TICAM1_RIP1_MEDIATED_IKK_COMPLEX_RECRUITMENT	0.990491	1	0.0353911	0.211377	0.512707	17
PID_ALK2_PATHWAY	0.983526	1	0.0375363	0.24525	0.506362	9
REACTOME_POLYMERASE_SWITCHING	0.993517	1	0.0363018	0.21887	0.505596	14
WP_OSX_AND_MIRNAS_IN_TOOTH_DEVELOPMENT	0.982143	1	0.0369161	0.227514	0.504918	12
PID_RXR_VDR_PATHWAY	0.99687	1	0.0344919	0.197367	0.50251	21
WP_SMC1SMC3_ROLE_IN_DNA_DAMAGE_CORNELIA_DE_LANGE_SYNDROME	0.975369	1	0.0377705	0.229931	0.500793	11
WP_GLIAL_CELL_DIFFERENTIATION	0.977929	1	0.0391956	0.267435	0.499664	6
REACTOME_MATURATION_OF_SARS_COV_1_SPIKE_PROTEIN	0.989619	1	0.0395172	0.277824	0.491184	5
WP_KETOGENESIS_AND_KETOLYSIS	0.979592	1	0.0391956	0.247405	0.490831	8
REACTOME_INCRETIN_SYNTHESIS_SECRETION_AND_INACTIVATION	0.993517	1	0.0363018	0.21061	0.486516	14
WP_BILE_ACIDS_SYNTHESIS_AND_ENTEROHEPATIC_CIRCULATION	0.989744	1	0.0389556	0.251319	0.483618	7
WP_UREA_CYCLE_AND_RELATED_DISEASES	0.989744	1	0.0389556	0.250376	0.481803	7
BIOCARTA_ACH_PATHWAY	0.983607	1	0.037303	0.223571	0.478817	10
REACTOME_BIOSYNTHESIS_OF_MARESIN_LIKE_SPMS	0.998127	1	0.0427591	0.329317	0.477516	2
WP_PROGERIAASSOCIATED_LIPODYSTROPHY	0.998408	1	0.0352404	0.194776	0.476347	18
REACTOME_ACTIVATED_NTRK2_SIGNALS_THROUGH_PI3K	0.993162	1	0.0387962	0.245856	0.473105	7
BIOCARTA_EXTRINSIC_PATHWAY	0.991511	1	0.0385579	0.252704	0.472141	6
REACTOME_FLT3_SIGNALING_BY_CBL_MUTANTS	0.994907	1	0.0383996	0.24895	0.465128	6
REACTOME_REGULATION_OF_SIGNALING_BY_NODAL	0.994681	1	0.0404114	0.276114	0.462557	4
WP_PENTOSE_PHOSPHATE_METABOLISM	0.993162	1	0.0387962	0.235696	0.453555	7
REACTOME_REGULATION_OF_NPAS4_MRNA_TRANSLATION	0.99341	1	0.0370705	0.218423	0.450974	9
REACTOME_SIGNALING_BY_MRAS_COMPLEX_MUTANTS	0.991497	1	0.0386372	0.224831	0.446046	8
REACTOME_NR1H2_NR1H3_REGULATE_GENE_EXPRESSION_TO_CONTROL_BILE_ACID_HOMEOSTASIS	0.998291	1	0.0385579	0.2186	0.420657	7
REACTOME_SYNTHESIS_OF_PIPS_AT_THE_ER_MEMBRANE	1	1	0.0390355	0.237916	0.420628	5
REACTOME_MATURATION_OF_PROTEIN_3A	1	1	0.05653	-0.161437	-0.351111	9
REACTOME_CYTOSOLIC_IRON_SULFUR_CLUSTER_ASSEMBLY	1	1	0.0567672	-0.160344	-0.36426	11
REACTOME_INTESTINAL_ABSORPTION	0.997863	1	0.048799	-0.284646	-0.424958	2
REACTOME_SUMO_IS_TRANSFERRED_FROM_E1_TO_E2_UBE2I_UBC9	0.990408	1	0.0544556	-0.228333	-0.46708	7
BIOCARTA_PTEN_PATHWAY	1	1	0.059476	-0.186493	-0.48656	17
REACTOME_HDL_ASSEMBLY	0.985472	1	0.0551352	-0.250935	-0.492078	6
REACTOME_RHO_GTPASES_ACTIVATE_NADPH_OXIDASES	0.981183	1	0.0602484	-0.210649	-0.50616	13
REACTOME_NEGATIVE_REGULATION_OF_MET_ACTIVITY	0.98895	1	0.0611693	-0.194779	-0.527887	20
REACTOME_APOBEC3G_MEDIATED_RESISTANCE_TO_HIV_1_INFECTION	0.950472	1	0.0555947	-0.280769	-0.530993	5
WP_FAMILIAL_PARTIAL_LIPODYSTROPHY	0.994382	1	0.0617054	-0.195258	-0.547659	22
WP_HEDGEHOG_SIGNALING_PATHWAY_WP47	0.958549	1	0.0596037	-0.234011	-0.549075	12
REACTOME_TRANSCRIPTION_OF_E2F_TARGETS_UNDER_NEGATIVE_CONTROL_BY_P107_RBL1_AND_P130_RBL2_IN_COMPLEX_WITH_HDAC1	0.975543	1	0.0610364	-0.214752	-0.549736	16
REACTOME_SMAD2_SMAD3_SMAD4_HETEROTRIMER_REGULATES_TRANSCRIPTION	0.996875	1	0.0667426	-0.179192	-0.549876	36
REACTOME_GRB2_SOS_PROVIDES_LINKAGE_TO_MAPK_SIGNALING_FOR_INTEGRINS	0.969388	1	0.0583453	-0.249896	-0.551622	10
REACTOME_TNFR1_MEDIATED_CERAMIDE_PRODUCTION	0.938679	1	0.0561767	-0.291942	-0.552123	5
WP_ALTERED_GLYCOSYLATION_OF_MUC1_IN_TUMOR_MICROENVIRONMENT	0.956835	1	0.0560596	-0.271022	-0.554406	7
REACTOME_DOWNREGULATION_OF_ERBB2_SIGNALING	0.988858	1	0.0615707	-0.194387	-0.559593	26
REACTOME_SIGNALING_BY_NOTCH1_T_7_9_NOTCH1_M1580_K2555_TRANSLOCATION_MUTANT	0.952038	1	0.0562941	-0.273903	-0.560299	7
WP_GLYCEROLIPIDS_AND_GLYCEROPHOSPHOLIPIDS	0.983471	1	0.0613026	-0.203443	-0.561513	21
REACTOME_RECEPTOR_MEDIATED_MITOPHAGY	0.961832	1	0.0585938	-0.24867	-0.564916	11
REACTOME_ALK_MUTANTS_BIND_TKIS	0.955959	1	0.0597318	-0.240898	-0.565234	12
PID_HEDGEHOG_GLI_PATHWAY	1	1	0.0679923	-0.169236	-0.565354	47
BIOCARTA_TALL1_PATHWAY	0.953368	1	0.0598603	-0.243871	-0.572209	12
REACTOME_DNA_STRAND_ELONGATION	0.996875	1	0.0667426	-0.194253	-0.580272	32
WP_FBXL10_ENHANCEMENT_OF_MAPERK_SIGNALING_IN_DIFFUSE_LARGE_BCELL_LYMPHOMA	0.946565	1	0.0593488	-0.258374	-0.586959	11
REACTOME_REGULATION_OF_RUNX1_EXPRESSION_AND_ACTIVITY	0.975741	1	0.0606404	-0.225486	-0.588293	17
BIOCARTA_DICER_PATHWAY	0.915094	1	0.0573667	-0.31118	-0.588507	5
WP_KENNEDY_PATHWAY_FROM_SPHINGOLIPIDS	0.955844	1	0.0598603	-0.239563	-0.591678	14
REACTOME_GLI_PROTEINS_BIND_PROMOTERS_OF_HH_RESPONSIVE_GENES_TO_PROMOTE_TRANSCRIPTION	0.915254	1	0.0585938	-0.303201	-0.594571	6
BIOCARTA_TFF_PATHWAY	0.97191	1	0.0628004	-0.222841	-0.595349	19
REACTOME_SYNTHESIS_SECRETION_AND_INACTIVATION_OF_GLUCAGON_LIKE_PEPTIDE_1_GLP_1	0.943548	1	0.0621124	-0.24799	-0.595886	13
REACTOME_SYNTHESIS_SECRETION_AND_INACTIVATION_OF_GLUCOSE_DEPENDENT_INSULINOTROPIC_POLYPEPTIDE_GIP	0.936709	1	0.0596037	-0.274038	-0.596009	9
REACTOME_ACTIVATED_PKN1_STIMULATES_TRANSCRIPTION_OF_AR_ANDROGEN_RECEPTOR_REGULATED_GENES_KLK2_AND_KLK3	0.90566	1	0.057853	-0.316272	-0.598138	5
WP_SARSCOV2_B117_VARIANT_ANTAGONISES_INNATE_IMMUNE_ACTIVATION	0.930456	1	0.0573667	-0.293435	-0.600254	7
REACTOME_TRANSCRIPTIONAL_REGULATION_OF_WHITE_ADIPOCYTE_DIFFERENTIATION	1	1	0.0751182	-0.166807	-0.607311	73
REACTOME_METABOLISM_OF_COFACTORS	0.960674	1	0.0633597	-0.228683	-0.610957	19
KEGG_NON_SMALL_CELL_LUNG_CANCER	0.996678	1	0.0697793	-0.18187	-0.611829	50
REACTOME_SIRT1_NEGATIVELY_REGULATES_RRNA_EXPRESSION	0.903382	1	0.0590955	-0.289421	-0.615303	8
KEGG_STEROID_BIOSYNTHESIS	0.93883	1	0.0618406	-0.244572	-0.615628	15
REACTOME_DCC_MEDIATED_ATTRACTIVE_SIGNALING	0.935484	1	0.0625237	-0.256282	-0.61581	13
WP_SPHINGOLIPID_METABOLISM_IN_SENESCENCE	0.966574	1	0.0626618	-0.213964	-0.61595	26
REACTOME_TRANSPORT_OF_FATTY_ACIDS	0.874429	0.998472	0.0579755	-0.348198	-0.61739	4
WP_DNA_REPLICATION	0.993691	1	0.0673624	-0.194355	-0.619762	41
REACTOME_SPRY_REGULATION_OF_FGF_SIGNALING	0.9375	1	0.0629395	-0.242171	-0.619924	16
WP_EBSTEINBARR_VIRUS_LMP1_SIGNALING	0.962264	1	0.0613026	-0.237735	-0.620252	17
PID_ERBB4_PATHWAY	0.990476	1	0.0678338	-0.204798	-0.621632	35
WP_ATR_SIGNALING	0.89372	1	0.0596037	-0.292863	-0.622619	8
REACTOME_SIGNALING_BY_NTRK2_TRKB	0.983146	1	0.062249	-0.2197	-0.623625	25
REACTOME_IKBA_VARIANT_LEADS_TO_EDA_ID	0.913669	1	0.0582216	-0.304947	-0.623803	7
WP_PRION_DISEASE_PATHWAY	0.978852	1	0.0659816	-0.214317	-0.623853	29
REACTOME_SIGNALING_BY_FLT3_ITD_AND_TKD_MUTANTS	0.9375	1	0.0629395	-0.243869	-0.624271	16
REACTOME_PCNA_DEPENDENT_LONG_PATCH_BASE_EXCISION_REPAIR	0.964187	1	0.062249	-0.226272	-0.624521	21
REACTOME_FORMATION_OF_XYLULOSE_5_PHOSPHATE	0.889151	0.998472	0.0587186	-0.330324	-0.624713	5
REACTOME_UPTAKE_AND_FUNCTION_OF_DIPHTHERIA_TOXIN	0.886199	0.998472	0.0601186	-0.318595	-0.624757	6
REACTOME_DISEASES_OF_PROGRAMMED_CELL_DEATH	1	1	0.0683111	-0.202771	-0.625113	38
PID_LYMPH_ANGIOGENESIS_PATHWAY	0.983146	1	0.062249	-0.221094	-0.627582	25
REACTOME_NECTIN_NECL_TRANS_HETERODIMERIZATION	0.911271	1	0.0583453	-0.306962	-0.627925	7
REACTOME_NEGATIVE_REGULATION_OF_FGFR1_SIGNALING	0.969014	1	0.063079	-0.222704	-0.628632	23
REACTOME_BETA_OXIDATION_OF_HEXANOYL_COA_TO_BUTANOYL_COA	0.879717	0.998472	0.0592219	-0.332863	-0.629514	5
REACTOME_TRANSCRIPTIONAL_REGULATION_BY_VENTX	0.99375	1	0.0668966	-0.206153	-0.632611	36
REACTOME_REGULATION_OF_SIGNALING_BY_CBL	0.938202	1	0.0645031	-0.237047	-0.633303	19
REACTOME_RUNX2_REGULATES_CHONDROCYTE_MATURATION	0.863014	0.998472	0.0585938	-0.357509	-0.633899	4
WP_QUERCETIN_AND_NFKB_AP1_INDUCED_APOPTOSIS	0.91129	1	0.0637845	-0.264793	-0.636262	13
REACTOME_INLB_MEDIATED_ENTRY_OF_LISTERIA_MONOCYTOGENES_INTO_HOST_CELL	0.925532	1	0.0625237	-0.254518	-0.640664	15
WP_NANOPARTICLEMEDIATED_ACTIVATION_OF_RECEPTOR_SIGNALING	0.962319	1	0.0647943	-0.222192	-0.640949	27
REACTOME_RA_BIOSYNTHESIS_PATHWAY	0.91129	1	0.0637845	-0.267051	-0.641687	13
REACTOME_ADORA2B_MEDIATED_ANTI_INFLAMMATORY_CYTOKINES_PRODUCTION	0.990476	1	0.0678338	-0.211673	-0.642499	35
REACTOME_PI5P_REGULATES_TP53_ACETYLATION	0.881643	0.998472	0.0602484	-0.302344	-0.642776	8
REACTOME_RETROGRADE_TRANSPORT_AT_THE_TRANS_GOLGI_NETWORK	1	1	0.0683111	-0.190776	-0.643637	49
REACTOME_G2_PHASE	0.865566	0.998472	0.0599892	-0.342344	-0.647445	5
PID_NEPHRIN_NEPH1_PATHWAY	0.958824	1	0.0656814	-0.222682	-0.648089	28
BIOCARTA_HCMV_PATHWAY	0.918478	1	0.0639272	-0.25461	-0.651765	16
BIOCARTA_PPARG_PATHWAY	0.88729	0.998472	0.0596037	-0.319565	-0.653706	7
WP_FATTY_ACID_BETAOXIDATION	0.952941	1	0.0659816	-0.225295	-0.655692	28
REACTOME_GABA_B_RECEPTOR_ACTIVATION	0.980583	1	0.0692836	-0.220089	-0.660991	34
REACTOME_ACTIVATED_NTRK2_SIGNALS_THROUGH_CDK5	0.866828	0.998472	0.0611693	-0.337126	-0.661097	6
WP_NAD_METABOLISM_SIRTUINS_AND_AGING	0.875949	0.998472	0.0628004	-0.304241	-0.661699	9
WP_RETINOBLASTOMA_GENE_IN_CANCER	1	1	0.0766747	-0.176528	-0.664009	86
WP_DEVELOPMENT_AND_HETEROGENEITY_OF_THE_ILC_FAMILY	0.869565	0.998472	0.0609039	-0.313158	-0.665765	8
WP_CANONICAL_NFKB_PATHWAY	0.869565	0.998472	0.0609039	-0.313854	-0.667247	8
REACTOME_WNT_MEDIATED_ACTIVATION_OF_DVL	0.869565	0.998472	0.0609039	-0.313872	-0.667285	8
REACTOME_LOSS_OF_MECP2_BINDING_ABILITY_TO_THE_NCOR_SMRT_COMPLEX	0.877698	0.998472	0.0601186	-0.326737	-0.668377	7
REACTOME_CA2_ACTIVATED_K_CHANNELS	0.861985	0.998472	0.0614364	-0.3418	-0.670262	6
REACTOME_LIGAND_RECEPTOR_INTERACTIONS	0.861985	0.998472	0.0614364	-0.341947	-0.67055	6
REACTOME_EGFR_INTERACTS_WITH_PHOSPHOLIPASE_C_GAMMA	0.835616	0.993291	0.0601186	-0.378242	-0.670661	4
REACTOME_SIGNALING_BY_ALK_IN_CANCER	0.993355	1	0.0699459	-0.196881	-0.670798	53
WP_DNA_MISMATCH_REPAIR	0.940845	1	0.0645031	-0.237899	-0.671524	23
KEGG_DNA_REPLICATION	0.977778	1	0.0684715	-0.221491	-0.672303	35
BIOCARTA_HSP27_PATHWAY	0.867347	0.998472	0.0636424	-0.305446	-0.674243	10
WP_PROSURVIVAL_SIGNALING_OF_NEUROPROTECTIN_D1	0.873057	0.998472	0.0640704	-0.28783	-0.675352	12
REACTOME_FLT3_SIGNALING_IN_DISEASE	0.944928	1	0.0656814	-0.234136	-0.675403	27
REACTOME_CONSTITUTIVE_SIGNALING_BY_OVEREXPRESSED_ERBB2	0.867684	0.998472	0.0635008	-0.298315	-0.677695	11
REACTOME_BINDING_OF_TCF_LEF_CTNNB1_TO_TARGET_GENE_PROMOTERS	0.870504	0.998472	0.0605093	-0.331343	-0.677799	7
BIOCARTA_IL12_PATHWAY	0.853165	0.996441	0.0640704	-0.311748	-0.678027	9
BIOCARTA_CELLCYCLE_PATHWAY	0.926966	1	0.0650878	-0.242096	-0.679031	22
REACTOME_SODIUM_COUPLED_PHOSPHATE_COTRANSPORTERS	0.804301	0.984072	0.0590955	-0.409218	-0.68013	3
REACTOME_REGULATION_OF_PTEN_LOCALIZATION	0.850633	0.995335	0.0642141	-0.314612	-0.684255	9
REACTOME_DIGESTION_AND_ABSORPTION	0.856115	0.99733	0.0613026	-0.334559	-0.684378	7
REACTOME_IRF3_MEDIATED_ACTIVATION_OF_TYPE_1_IFN	0.802151	0.984072	0.0592219	-0.411899	-0.684587	3
REACTOME_ADENYLATE_CYCLASE_INHIBITORY_PATHWAY	0.867876	0.998472	0.0643583	-0.292443	-0.686176	12
KEGG_THYROID_CANCER	0.930362	1	0.0645031	-0.238535	-0.686685	26
REACTOME_PROTEIN_METHYLATION	0.913747	1	0.0637845	-0.263269	-0.686869	17
REACTOME_ESTABLISHMENT_OF_SISTER_CHROMATID_COHESION	0.860051	0.997961	0.0639272	-0.302466	-0.687125	11
WP_TNFRELATED_WEAK_INDUCER_OF_APOPTOSIS_TWEAK_SIGNALING_PATHWAY	0.961905	1	0.0692836	-0.223124	-0.687423	37
REACTOME_ACETYLCHOLINE_INHIBITS_CONTRACTION_OF_OUTER_HAIR_CELLS	0.844017	0.995335	0.05653	-0.46046	-0.687437	2
WP_VITAMIN_B6DEPENDENT_AND_RESPONSIVE_DISORDERS	0.847458	0.995335	0.062249	-0.350562	-0.687444	6
WP_APOPTOSIS_MODULATION_BY_HSP70	0.927807	1	0.0626618	-0.258764	-0.687809	18
REACTOME_SIGNAL_AMPLIFICATION	0.917614	1	0.0661326	-0.244487	-0.688735	24
KEGG_NUCLEOTIDE_EXCISION_REPAIR	0.977918	1	0.0681513	-0.212298	-0.688919	43
PID_CXCR3_PATHWAY	0.957929	1	0.0704501	-0.229402	-0.688961	34
WP_CANNABINOID_RECEPTOR_SIGNALING	0.926761	1	0.0652353	-0.244137	-0.689133	23
REACTOME_PHOSPHORYLATION_OF_THE_APC_C	0.911602	1	0.0650878	-0.254348	-0.689332	20
REACTOME_ETHANOL_OXIDATION	0.845036	0.995335	0.0623861	-0.351548	-0.689378	6
WP_OVERVIEW_OF_NANOPARTICLE_EFFECTS	0.860215	0.997961	0.0665892	-0.287216	-0.690139	13
WP_HIJACK_OF_UBIQUITINATION_BY_SARSCOV2	0.842995	0.995335	0.0623861	-0.324839	-0.6906	8
WP_FAMILIAL_HYPERLIPIDEMIA_TYPE_1	0.844388	0.995335	0.0649408	-0.313408	-0.691817	10
WP_FAMILIAL_HYPERLIPIDEMIA_TYPE_5	0.844388	0.995335	0.0649408	-0.313408	-0.691817	10
WP_SLEEP_REGULATION	0.898876	1	0.0665892	-0.259797	-0.694083	19
REACTOME_DIGESTION	0.813679	0.985528	0.0629395	-0.367408	-0.694846	5
REACTOME_REELIN_SIGNALLING_PATHWAY	0.813679	0.985528	0.0629395	-0.367522	-0.695061	5
REACTOME_RECRUITMENT_OF_MITOTIC_CENTROSOME_PROTEINS_AND_COMPLEXES	0.996078	1	0.0782955	-0.189333	-0.695443	80
WP_NUCLEOTIDE_EXCISION_REPAIR	0.969419	1	0.0670513	-0.211409	-0.696767	44
WP_INTERACTIONS_BETWEEN_LOXL4_AND_OXIDATIVE_STRESS_PATHWAY	0.888587	0.998472	0.0655321	-0.272717	-0.698118	16
REACTOME_DISEASES_OF_BASE_EXCISION_REPAIR	0.811321	0.985528	0.063079	-0.369672	-0.699127	5
REACTOME_APC_CDC20_MEDIATED_DEGRADATION_OF_NEK2A	0.924791	1	0.0647943	-0.242937	-0.699357	26
BIOCARTA_CARM_ER_PATHWAY	0.912676	1	0.0659816	-0.247788	-0.699438	23
REACTOME_FGFR1B_LIGAND_BINDING_AND_ACTIVATION	0.787097	0.982592	0.0601186	-0.421878	-0.701173	3
REACTOME_MRNA_DECAY_BY_5_TO_3_EXORIBONUCLEASE	0.87766	0.998472	0.0650878	-0.278665	-0.701444	15
WP_IL10_ANTIINFLAMMATORY_SIGNALING_PATHWAY	0.816425	0.985528	0.0639272	-0.330245	-0.702093	8
PID_ERBB2_ERBB3_PATHWAY	0.952229	1	0.0699459	-0.218421	-0.702467	42
REACTOME_ACTIVATION_OF_IRF3_IRF7_MEDIATED_BY_TBK1_IKK_EPSILON	0.854839	0.996455	0.0668966	-0.292518	-0.702879	13
BIOCARTA_PGC1A_PATHWAY	0.875	0.998472	0.0652353	-0.279342	-0.703149	15
WP_PHYSIOLOGICAL_AND_PATHOLOGICAL_HYPERTROPHY_OF_THE_HEART	0.912676	1	0.0659816	-0.249107	-0.703162	23
REACTOME_CA_DEPENDENT_EVENTS	0.955556	1	0.0696133	-0.23176	-0.70347	35
REACTOME_HEME_SIGNALING	0.949527	1	0.0696133	-0.220802	-0.704097	41
WP_TAMOXIFEN_METABOLISM	0.813559	0.985528	0.0642141	-0.359157	-0.704298	6
PID_NETRIN_PATHWAY	0.91875	1	0.0707899	-0.235856	-0.704549	32
KEGG_PPAR_SIGNALING_PATHWAY	0.968454	1	0.0686326	-0.217255	-0.705003	43
REACTOME_REGULATION_OF_CHOLESTEROL_BIOSYNTHESIS_BY_SREBP_SREBF	0.970779	1	0.0699459	-0.203969	-0.705408	55
BIOCARTA_MAL_PATHWAY	0.893048	1	0.0645031	-0.265609	-0.706003	18
BIOCARTA_PLCD_PATHWAY	0.805936	0.984072	0.0618406	-0.398417	-0.706432	4
BIOCARTA_EEA1_PATHWAY	0.832134	0.992339	0.0626618	-0.345515	-0.706789	7
REACTOME_G1_S_SPECIFIC_TRANSCRIPTION	0.92145	1	0.0689567	-0.242907	-0.707075	29
BIOCARTA_CREB_PATHWAY	0.900826	1	0.0655321	-0.256222	-0.707183	21
REACTOME_FGFR1C_LIGAND_BINDING_AND_ACTIVATION	0.804245	0.984072	0.0635008	-0.373991	-0.707295	5
REACTOME_SYNTHESIS_OF_DOLICHYL_PHOSPHATE	0.813559	0.985528	0.0642141	-0.36071	-0.707343	6
WP_G1_TO_S_CELL_CYCLE_CONTROL	0.993355	1	0.0699459	-0.199541	-0.708157	62
BIOCARTA_ATRBRCA_PATHWAY	0.900826	1	0.0655321	-0.256738	-0.708608	21
WP_T_CELL_MODULATION_IN_PANCREATIC_CANCER	0.88764	0.998472	0.0672065	-0.253336	-0.710558	22
WP_TRANSCRIPTIONAL_CASCADE_REGULATING_ADIPOGENESIS	0.81519	0.985528	0.0662842	-0.326816	-0.710798	9
PID_IL12_STAT4_PATHWAY	0.853261	0.996441	0.0675189	-0.277706	-0.710888	16
REACTOME_INTERLEUKIN_17_SIGNALING	0.982993	1	0.0716527	-0.199453	-0.711311	66
WP_RALA_DOWNSTREAM_REGULATED_GENES	0.832061	0.992339	0.0655321	-0.313234	-0.711588	11
PID_ERBB_NETWORK_PATHWAY	0.832061	0.992339	0.0655321	-0.313797	-0.712867	11
REACTOME_EXTRINSIC_PATHWAY_OF_FIBRIN_CLOT_FORMATION	0.82265	0.988398	0.0577309	-0.477539	-0.712936	2
WP_HEMATOPOIETIC_STEM_CELL_GENE_REGULATION_BY_GABP_ALPHABETA_COMPLEX	0.878453	0.998472	0.0668966	-0.263197	-0.713313	20
REACTOME_PI3K_EVENTS_IN_ERBB2_SIGNALING	0.854545	0.996455	0.0652353	-0.289415	-0.714804	14
REACTOME_ACTIVATION_OF_SMO	0.847826	0.995335	0.0678338	-0.279863	-0.716409	16
REACTOME_ACTIVATION_OF_GENE_EXPRESSION_BY_SREBF_SREBP	0.952229	1	0.0699459	-0.222805	-0.716565	42
REACTOME_NEF_MEDIATED_CD8_DOWN_REGULATION	0.803874	0.984072	0.0647943	-0.36641	-0.718522	6
REACTOME_CD28_DEPENDENT_PI3K_AKT_SIGNALING	0.879679	0.998472	0.0652353	-0.270545	-0.719124	18
PID_ALK1_PATHWAY	0.887052	0.998472	0.0662842	-0.260568	-0.719178	21
REACTOME_ERBB2_ACTIVATES_PTK6_SIGNALING	0.824427	0.98922	0.0659816	-0.316671	-0.719396	11
REACTOME_G_BETA_GAMMA_SIGNALLING_THROUGH_PI3KGAMMA	0.884831	0.998472	0.0673624	-0.269515	-0.720046	19
WP_PHOTODYNAMIC_THERAPYINDUCED_NFE2L2_NRF2_SURVIVAL_SIGNALING	0.882022	0.998472	0.0675189	-0.256832	-0.720363	22
PID_ERBB1_RECEPTOR_PROXIMAL_PATHWAY	0.942857	1	0.0702813	-0.237462	-0.720779	35
WP_BIOMARKERS_FOR_PYRIMIDINE_METABOLISM_DISORDERS	0.833333	0.992339	0.0681513	-0.300592	-0.72228	13
PID_ARF6_PATHWAY	0.881159	0.998472	0.0691198	-0.250966	-0.723952	27
BIOCARTA_LAIR_PATHWAY	0.794189	0.982592	0.0653834	-0.370447	-0.726437	6
WP_CELLS_AND_MOLECULES_INVOLVED_IN_LOCAL_ACUTE_INFLAMMATORY_RESPONSE	0.794189	0.982592	0.0653834	-0.370447	-0.726437	6
WP_G_PROTEIN_SIGNALING_PATHWAYS	0.984314	1	0.078921	-0.197872	-0.726809	80
BIOCARTA_CDK5_PATHWAY	0.816794	0.985587	0.0664364	-0.320375	-0.727811	11
REACTOME_EXTENSION_OF_TELOMERES	0.97351	1	0.0707899	-0.214465	-0.728279	51
WP_SILDENAFIL_TREATMENT	0.873596	0.998472	0.0679923	-0.272671	-0.728476	19
WP_FTO_OBESITY_VARIANT_MECHANISM	0.789346	0.982592	0.0656814	-0.371691	-0.728878	6
BIOCARTA_PS1_PATHWAY	0.833333	0.992339	0.0681513	-0.303415	-0.729065	13
PID_FANCONI_PATHWAY	0.931889	1	0.0696133	-0.22025	-0.730338	45
REACTOME_BETA_OXIDATION_OF_LAUROYL_COA_TO_DECANOYL_COA_COA	0.792237	0.982592	0.0626618	-0.412165	-0.730809	4
REACTOME_REGULATION_OF_PLK1_ACTIVITY_AT_G2_M_TRANSITION	0.984733	1	0.0774768	-0.19476	-0.732588	86
REACTOME_OLFACTORY_SIGNALING_PATHWAY	0.789855	0.982592	0.0655321	-0.344663	-0.732745	8
REACTOME_PRESYNAPTIC_DEPOLARIZATION_AND_CALCIUM_CHANNEL_OPENING	0.795918	0.982592	0.0678338	-0.332461	-0.733875	10
REACTOME_MET_ACTIVATES_RAS_SIGNALING	0.795918	0.982592	0.0678338	-0.332825	-0.734679	10
REACTOME_CD28_CO_STIMULATION	0.878261	0.998472	0.0692836	-0.255118	-0.73593	27
PID_INSULIN_GLUCOSE_PATHWAY	0.856338	0.99733	0.0691198	-0.260814	-0.736208	23
BIOCARTA_SUMO_PATHWAY	0.779661	0.980504	0.0662842	-0.375467	-0.736282	6
BIOCARTA_MCM_PATHWAY	0.858289	0.997813	0.0664364	-0.277485	-0.737571	18
REACTOME_ACTIVATION_OF_THE_PRE_REPLICATIVE_COMPLEX	0.890625	0.998472	0.0723571	-0.247329	-0.738822	32
REACTOME_TRAF6_MEDIATED_INDUCTION_OF_TAK1_COMPLEX_WITHIN_TLR4_COMPLEX	0.790155	0.982592	0.0689567	-0.315429	-0.740111	12
REACTOME_CA2_PATHWAY	0.95098	1	0.0713053	-0.215957	-0.741111	54
REACTOME_RHO_GTPASES_ACTIVATE_KTN1	0.790816	0.982592	0.0681513	-0.335744	-0.741122	10
REACTOME_ACTIVATED_NTRK3_SIGNALS_THROUGH_RAS	0.78744	0.982592	0.0656814	-0.348866	-0.74168	8
REACTOME_INITIATION_OF_NUCLEAR_ENVELOPE_NE_REFORMATION	0.853933	0.996455	0.0691198	-0.2781	-0.742981	19
REACTOME_ZBP1_DAI_MEDIATED_INDUCTION_OF_TYPE_I_IFNS	0.84097	0.995335	0.0678338	-0.28488	-0.743252	17
WP_H19_ACTION_RBE2F1_SIGNALING_AND_CDKBETACATENIN_ACTIVITY	0.81039	0.985423	0.0678338	-0.301013	-0.74345	14
BIOCARTA_ATM_PATHWAY	0.842541	0.995335	0.0689567	-0.274406	-0.743691	20
WP_GASTRIC_CANCER_NETWORK_1	0.839888	0.995335	0.0699459	-0.265274	-0.744041	22
PID_PI3KCI_PATHWAY	0.920635	1	0.0714786	-0.241582	-0.744292	37
REACTOME_DNA_DOUBLE_STRAND_BREAK_RESPONSE	0.929664	1	0.0691198	-0.22592	-0.744592	44
REACTOME_HYDROLYSIS_OF_LPC	0.765133	0.972405	0.0672065	-0.380385	-0.745927	6
REACTOME_UNBLOCKING_OF_NMDA_RECEPTORS_GLUTAMATE_BINDING_AND_ACTIVATION	0.845506	0.995335	0.0696133	-0.279598	-0.746985	19
WP_NAD_METABOLISM_IN_ONCOGENEINDUCED_SENESCENCE_AND_MITOCHONDRIAL_DYSFUNCTIONASSOCIATED_SENESCENCE	0.842541	0.995335	0.0689567	-0.275877	-0.74768	20
WP_MAMMARY_GLAND_DEVELOPMENT_PATHWAY_EMBRYONIC_DEVELOPMENT_STAGE_1_OF_4	0.794805	0.982592	0.0687943	-0.303645	-0.749951	14
BIOCARTA_RELA_PATHWAY	0.798387	0.983374	0.0702813	-0.312734	-0.751457	13
WP_NEURODEGENERATION_WITH_BRAIN_IRON_ACCUMULATION_NBIA_SUBTYPES_PATHWAY	0.923547	1	0.0694481	-0.228302	-0.752441	44
BIOCARTA_LYM_PATHWAY	0.764151	0.972405	0.0659816	-0.399296	-0.755152	5
BIOCARTA_IL4_PATHWAY	0.746835	0.963386	0.0706196	-0.347454	-0.755683	9
REACTOME_RIP_MEDIATED_NFKB_ACTIVATION_VIA_ZBP1	0.781818	0.981012	0.0696133	-0.306154	-0.756147	14
BIOCARTA_ACTINY_PATHWAY	0.76943	0.975111	0.0702813	-0.322488	-0.756673	12
REACTOME_NOTCH4_INTRACELLULAR_DOMAIN_REGULATES_TRANSCRIPTION	0.831492	0.992339	0.0696133	-0.27938	-0.757172	20
REACTOME_CDC6_ASSOCIATION_WITH_THE_ORC_ORIGIN_COMPLEX	0.758454	0.96994	0.0675189	-0.356302	-0.75749	8
WP_PHASE_I_BIOTRANSFORMATIONS_NON_P450	0.759434	0.969952	0.0662842	-0.401835	-0.759954	5
REACTOME_TRANSLESION_SYNTHESIS_BY_POLH	0.828652	0.990975	0.0706196	-0.284526	-0.760149	19
PID_NFKAPPAB_CANONICAL_PATHWAY	0.825967	0.989299	0.0699459	-0.280924	-0.761357	20
PID_ERB_GENOMIC_PATHWAY	0.795699	0.982592	0.0704501	-0.317039	-0.761801	13
REACTOME_REGULATION_OF_LIPID_METABOLISM_BY_PPARALPHA	0.987179	1	0.0833634	-0.199313	-0.762298	105
REACTOME_DNA_DOUBLE_STRAND_BREAK_REPAIR	0.99095	1	0.0862866	-0.190496	-0.762321	133
WP_4HYDROXYTAMOXIFEN_DEXAMETHASONE_AND_RETINOIC_ACIDS_REGULATION_OF_P27_EXPRESSION	0.815508	0.985528	0.0689567	-0.287137	-0.763225	18
REACTOME_MECP2_REGULATES_NEURONAL_RECEPTORS_AND_CHANNELS	0.803235	0.984072	0.0701132	-0.292701	-0.763656	17
REACTOME_MITOCHONDRIAL_TRNA_AMINOACYLATION	0.815508	0.985528	0.0689567	-0.287309	-0.763683	18
REACTOME_SEMA3A_PAK_DEPENDENT_AXON_REPULSION	0.788043	0.982592	0.0714786	-0.298427	-0.76393	16
REACTOME_SMAC_XIAP_REGULATED_APOPTOTIC_RESPONSE	0.772182	0.976872	0.0662842	-0.373833	-0.764717	7
KEGG_BIOSYNTHESIS_OF_UNSATURATED_FATTY_ACIDS	0.820225	0.986638	0.0711327	-0.287406	-0.767844	19
REACTOME_PTK6_REGULATES_CELL_CYCLE	0.745763	0.962458	0.0684715	-0.392298	-0.769287	6
BIOCARTA_MITR_PATHWAY	0.73516	0.956907	0.0662842	-0.433942	-0.769423	4
WP_WNTBETACATENIN_SIGNALING_PATHWAY_IN_LEUKEMIA	0.825843	0.989299	0.0707899	-0.271309	-0.770117	25
PID_AJDISS_2PATHWAY	0.899083	1	0.0707899	-0.233707	-0.770255	44
REACTOME_ACTIVATED_NTRK2_SIGNALS_THROUGH_RAS	0.721519	0.953151	0.0723571	-0.355062	-0.772229	9
WP_INFLUENCE_OF_LAMINOPATHIES_ON_WNT_SIGNALING	0.833333	0.992339	0.0751182	-0.260429	-0.772543	31
PID_IL5_PATHWAY	0.750636	0.963865	0.0706196	-0.340121	-0.772669	11
BIOCARTA_CTBP1_PATHWAY	0.736715	0.957543	0.0689567	-0.364024	-0.773906	8
KEGG_FATTY_ACID_METABOLISM	0.814815	0.985528	0.0762797	-0.264667	-0.775001	30
REACTOME_UBIQUINOL_BIOSYNTHESIS	0.729469	0.955255	0.0694481	-0.365018	-0.776019	8
REACTOME_SIGNALING_BY_FLT3_FUSION_PROTEINS	0.803371	0.984072	0.0721798	-0.290481	-0.776058	19
KEGG_MELANOGENESIS	0.958015	1	0.078921	-0.20657	-0.777012	86
WP_MALE_INFERTILITY	0.966165	1	0.0776799	-0.202945	-0.777491	94
PID_IFNG_PATHWAY	0.888889	0.998472	0.0732559	-0.252462	-0.777812	37
PID_UPA_UPAR_PATHWAY	0.802817	0.984072	0.0723571	-0.276168	-0.779548	23
WP_PTF1A_RELATED_REGULATORY_PATHWAY	0.727053	0.955051	0.0696133	-0.367371	-0.781021	8
WP_SPHINGOLIPID_PATHWAY	0.807799	0.984072	0.0714786	-0.27144	-0.78141	26
WP_FOXP3_IN_COVID19	0.731132	0.956334	0.0681513	-0.413213	-0.781472	5
REACTOME_FORMATION_OF_PARAXIAL_MESODERM	0.79558	0.982592	0.0718276	-0.288444	-0.781737	20
WP_NUCLEOTIDE_EXCISION_REPAIR_IN_XERODERMA_PIGMENTOSUM	0.931973	1	0.0743625	-0.224486	-0.782158	58
REACTOME_CYTOSOLIC_SENSORS_OF_PATHOGEN_ASSOCIATED_DNA	0.910345	1	0.0762797	-0.22612	-0.783183	57
WP_ONCOSTATIN_M_SIGNALING_PATHWAY	0.917763	1	0.0734381	-0.221287	-0.78333	60
REACTOME_VEGFR2_MEDIATED_CELL_PROLIFERATION	0.794944	0.982592	0.0727141	-0.29335	-0.783722	19
REACTOME_FORMATION_OF_ATP_BY_CHEMIOSMOTIC_COUPLING	0.747863	0.963865	0.062249	-0.524996	-0.783785	2
REACTOME_AKT_PHOSPHORYLATES_TARGETS_IN_THE_NUCLEUS	0.72449	0.953151	0.0725352	-0.355107	-0.783865	10
REACTOME_ASPARAGINE_N_LINKED_GLYCOSYLATION	1	1	0.11725	-0.18201	-0.784028	277
REACTOME_GLUCAGON_LIKE_PEPTIDE_1_GLP1_REGULATES_INSULIN_SECRETION	0.831715	0.992339	0.0776799	-0.261712	-0.785997	34
PID_LYSOPHOSPHOLIPID_PATHWAY	0.92517	1	0.0747385	-0.225597	-0.78603	58
REACTOME_MATURATION_OF_SARS_COV_2_NUCLEOPROTEIN	0.734043	0.956907	0.0739901	-0.312284	-0.786069	15
WP_G13_SIGNALING_PATHWAY	0.831715	0.992339	0.0776799	-0.262007	-0.786884	34
WP_BARDETBIEDL_SYNDROME	0.930909	1	0.077884	-0.213588	-0.786949	75
BIOCARTA_RECK_PATHWAY	0.745803	0.962458	0.0679923	-0.385003	-0.787567	7
WP_CELLULAR_PROTEOSTASIS	0.709443	0.949211	0.0709609	-0.403555	-0.791361	6
REACTOME_LYSINE_CATABOLISM	0.722798	0.953151	0.0734381	-0.337455	-0.79179	12
KEGG_RETINOL_METABOLISM	0.776243	0.979197	0.0730744	-0.292247	-0.792044	20
REACTOME_PROCESSING_OF_INTRONLESS_PRE_MRNAS	0.776243	0.979197	0.0730744	-0.292394	-0.792443	20
REACTOME_MITOCHONDRIAL_FATTY_ACID_BETA_OXIDATION_OF_SATURATED_FATTY_ACIDS	0.696203	0.940987	0.0741759	-0.364638	-0.793057	9
REACTOME_AURKA_ACTIVATION_BY_TPX2	0.937729	1	0.077884	-0.220231	-0.793444	71
WP_AMPLIFICATION_AND_EXPANSION_OF_ONCOGENIC_PATHWAYS_AS_METASTATIC_TRAITS	0.755376	0.967511	0.0730744	-0.330349	-0.793784	13
REACTOME_CRISTAE_FORMATION	0.755376	0.967511	0.0730744	-0.330368	-0.793827	13
REACTOME_FCGAMMA_RECEPTOR_FCGR_DEPENDENT_PHAGOCYTOSIS	0.905455	1	0.0793435	-0.216047	-0.796008	75
WP_SUDDEN_INFANT_DEATH_SYNDROME_SIDS_SUSCEPTIBILITY_PATHWAYS	0.96789	1	0.0883594	-0.204417	-0.796068	119
PID_PS1_PATHWAY	0.85489	0.996455	0.0749279	-0.249652	-0.796094	41
WP_FAMILIAL_HYPERLIPIDEMIA_TYPE_4	0.722078	0.953151	0.0736213	-0.322427	-0.796338	14
REACTOME_PI_3K_CASCADE_FGFR4	0.732824	0.956907	0.0718276	-0.350628	-0.796538	11
PID_P38_ALPHA_BETA_PATHWAY	0.788301	0.982592	0.0727141	-0.27671	-0.796579	26
REACTOME_RHO_GTPASES_ACTIVATE_RHOTEKIN_AND_RHOPHILINS	0.736211	0.957543	0.0686326	-0.389663	-0.797099	7
REACTOME_MAPK3_ERK1_ACTIVATION	0.688608	0.936943	0.0747385	-0.367298	-0.798843	9
REACTOME_TP53_REGULATES_TRANSCRIPTION_OF_CELL_CYCLE_GENES	0.879479	0.998472	0.0751182	-0.238	-0.799462	48
WP_PRADERWILLI_AND_ANGELMAN_SYNDROME	0.859327	0.997961	0.0730744	-0.242769	-0.800123	44
WP_TCELL_ACTIVATION_SARSCOV2	0.89	0.998472	0.0756946	-0.231699	-0.800203	56
WP_FERROPTOSIS	0.884354	0.998472	0.0770737	-0.23002	-0.801441	58
WP_NUCLEAR_RECEPTORS	0.789326	0.982592	0.0730744	-0.282464	-0.801783	25
REACTOME_NEGATIVE_REGULATION_OF_FGFR4_SIGNALING	0.761236	0.969952	0.0749279	-0.286007	-0.802193	22
WP_DNA_REPAIR_PATHWAYS_FULL_NETWORK	0.963303	1	0.0886261	-0.206038	-0.802378	119
REACTOME_REGULATION_OF_LOCALIZATION_OF_FOXO_TRANSCRIPTION_FACTORS	0.722798	0.953151	0.0734381	-0.342273	-0.803096	12
REACTOME_NFE2L2_REGULATES_PENTOSE_PHOSPHATE_PATHWAY_GENES	0.707729	0.947936	0.0709609	-0.377761	-0.80311	8
REACTOME_TRANSPORT_TO_THE_GOLGI_AND_SUBSEQUENT_MODIFICATION	0.965686	1	0.0922597	-0.19634	-0.803187	167
REACTOME_NUCLEAR_SIGNALING_BY_ERBB4	0.785515	0.982592	0.0728939	-0.279028	-0.803253	26
[truncated: 1,085 more rows]

## Sheet: HEP_gsea_Canonical_pathways
pathway	pval	padj	log2err	ES	NES	size
BIOCARTA_ERAD_PATHWAY	0.000526004	0.0193244	0.477271	-0.72195	-1.89913	19
BIOCARTA_P53_PATHWAY	0.00121367	0.0313349	0.45506	-0.735885	-1.84415	16
BIOCARTA_SKP2E2F_PATHWAY	0.00181162	0.038824	0.45506	-0.834163	-1.79081	9
BIOCARTA_TFF_PATHWAY	0.00111996	0.0303176	0.45506	-0.738119	-1.91045	18
KEGG_ALANINE_ASPARTATE_AND_GLUTAMATE_METABOLISM	0.000645017	0.0226196	0.477271	-0.681086	-1.87535	24
KEGG_ARGININE_AND_PROLINE_METABOLISM	0.000222066	0.010543	0.518848	-0.601448	-1.90006	48
KEGG_BIOSYNTHESIS_OF_UNSATURATED_FATTY_ACIDS	2.07166e-05	0.00199786	0.57561	-0.768557	-2.0342	21
KEGG_COMPLEMENT_AND_COAGULATION_CASCADES	0.000877448	0.0279155	0.477271	-0.557096	-1.74053	45
KEGG_CYTOKINE_CYTOKINE_RECEPTOR_INTERACTION	0.00190676	0.0397839	0.45506	-0.434601	-1.57108	109
KEGG_FATTY_ACID_METABOLISM	0.000279551	0.0126867	0.498493	-0.628191	-1.86618	35
KEGG_GLYCINE_SERINE_AND_THREONINE_METABOLISM	3.18902e-06	0.000447333	0.627257	-0.768533	-2.14554	25
KEGG_HISTIDINE_METABOLISM	0.000867022	0.0278712	0.477271	-0.680974	-1.85373	23
KEGG_PEROXISOME	0.00246232	0.0477906	0.431708	-0.488953	-1.65375	70
KEGG_PPAR_SIGNALING_PATHWAY	0.000265673	0.0124222	0.498493	-0.572502	-1.8283	52
KEGG_PROTEIN_EXPORT	0.000165996	0.0085377	0.518848	-0.716634	-1.95081	23
KEGG_SPLICEOSOME	0.00166792	0.0370253	0.45506	0.420386	1.6135	125
KEGG_STEROID_HORMONE_BIOSYNTHESIS	0.000470566	0.017928	0.498493	-0.660295	-1.8815	28
KEGG_TRYPTOPHAN_METABOLISM	0.000104368	0.00607696	0.538434	-0.674328	-1.95474	30
KEGG_VALINE_LEUCINE_AND_ISOLEUCINE_DEGRADATION	0.00102689	0.0293424	0.45506	-0.575646	-1.762	42
NABA_ECM_REGULATORS	2.63396e-05	0.0023224	0.57561	-0.460921	-1.74685	157
NABA_MATRISOME	4.23201e-05	0.00318536	0.557332	-0.340197	-1.46983	597
NABA_MATRISOME_ASSOCIATED	9.57724e-05	0.00588386	0.538434	-0.353864	-1.47991	399
PID_AMB2_NEUTROPHILS_PATHWAY	0.00139142	0.0332863	0.45506	-0.625961	-1.79889	29
PID_FOXO_PATHWAY	0.00125242	0.0314225	0.45506	-0.557553	-1.75001	46
PID_IL12_2PATHWAY	0.00166463	0.0370253	0.45506	-0.588276	-1.74761	35
PID_INTEGRIN2_PATHWAY	0.00253497	0.0485896	0.431708	-0.654597	-1.73258	21
PID_NECTIN_PATHWAY	0.00122862	0.0313349	0.45506	-0.610529	-1.7698	30
PID_NFAT_TFPATHWAY	0.0016797	0.0370253	0.45506	-0.661332	-1.86365	26
PID_PRL_SIGNALING_EVENTS_PATHWAY	0.000550968	0.0196493	0.477271	-0.691559	-1.88255	23
PID_UPA_UPAR_PATHWAY	0.00137435	0.0332863	0.45506	-0.626414	-1.80019	29
REACTOME_ABERRANT_REGULATION_OF_MITOTIC_G1_S_TRANSITION_IN_CANCER_DUE_TO_RB1_DEFECTS	0.000734476	0.024372	0.477271	-0.742071	-1.89635	17
REACTOME_ACETYLCHOLINE_BINDING_AND_DOWNSTREAM_EVENTS	0.000436786	0.016849	0.498493	-0.915635	-1.78561	6
REACTOME_AMINO_ACID_TRANSPORT_ACROSS_THE_PLASMA_MEMBRANE	0.000314404	0.0134757	0.498493	-0.689995	-1.95505	27
REACTOME_ANTIGEN_PRESENTATION_FOLDING_ASSEMBLY_AND_PEPTIDE_LOADING_OF_CLASS_I_MHC	0.000143998	0.00761596	0.518848	-0.704601	-1.99644	27
REACTOME_ASPARAGINE_N_LINKED_GLYCOSYLATION	5.87205e-09	2.26514e-06	0.761461	-0.456982	-1.85201	283
REACTOME_ASSEMBLY_OF_ACTIVE_LPL_AND_LIPC_LIPASE_COMPLEXES	0.00222641	0.0449065	0.431708	-0.744879	-1.76207	13
REACTOME_ATTENUATION_PHASE	0.0016396	0.0370253	0.45506	-0.665726	-1.81223	23
REACTOME_AURKA_ACTIVATION_BY_TPX2	0.00124439	0.0314225	0.45506	0.497859	1.72433	71
REACTOME_BILE_ACID_AND_BILE_SALT_METABOLISM	7.24428e-05	0.00485997	0.538434	-0.673362	-1.96083	32
REACTOME_BIOLOGICAL_OXIDATIONS	3.59673e-05	0.00297949	0.557332	-0.45979	-1.71776	143
REACTOME_CELLULAR_RESPONSES_TO_STIMULI	0.0007015	0.0237735	0.477271	-0.307663	-1.34401	687
REACTOME_CHL1_INTERACTIONS	0.000918527	0.0285522	0.477271	-0.850244	-1.82534	9
REACTOME_CHROMATIN_MODIFYING_ENZYMES	1.49266e-05	0.0015884	0.593325	0.42778	1.74116	199
REACTOME_CHYLOMICRON_ASSEMBLY	0.000177539	0.00883686	0.518848	-0.870074	-1.91428	10
REACTOME_CHYLOMICRON_REMODELING	0.00190923	0.0397839	0.45506	-0.848561	-1.77183	8
REACTOME_CILIUM_ASSEMBLY	0.000307688	0.0134692	0.498493	0.400354	1.61516	182
REACTOME_CONDENSATION_OF_PROPHASE_CHROMOSOMES	0.00170212	0.0372534	0.45506	-0.751089	-1.77676	13
REACTOME_COPI_MEDIATED_ANTEROGRADE_TRANSPORT	0.00106097	0.0299454	0.45506	-0.454294	-1.59502	92
REACTOME_COPII_MEDIATED_VESICLE_TRANSPORT	0.0011602	0.0308654	0.45506	-0.504472	-1.68147	65
REACTOME_DEACTIVATION_OF_THE_BETA_CATENIN_TRANSACTIVATING_COMPLEX	0.00248052	0.047843	0.431708	0.55358	1.72949	40
REACTOME_DISEASES_ASSOCIATED_WITH_N_GLYCOSYLATION_OF_PROTEINS	0.00142292	0.0337779	0.45506	-0.680055	-1.79801	20
REACTOME_DISEASES_OF_METABOLISM	7.68222e-06	0.00091182	0.593325	-0.439084	-1.71375	207
REACTOME_DISEASES_OF_MITOTIC_CELL_CYCLE	0.00094474	0.028583	0.477271	-0.591681	-1.78713	38
REACTOME_ER_TO_GOLGI_ANTEROGRADE_TRANSPORT	0.000141883	0.00761596	0.518848	-0.444881	-1.66148	141
REACTOME_EXTRACELLULAR_MATRIX_ORGANIZATION	8.11311e-05	0.00521605	0.538434	-0.394948	-1.56774	247
REACTOME_FATTY_ACID_METABOLISM	3.41293e-07	6.58268e-05	0.674963	-0.516857	-1.9329	140
REACTOME_FATTY_ACYL_COA_BIOSYNTHESIS	3.6562e-05	0.00297949	0.557332	-0.686679	-1.99961	32
REACTOME_FORMATION_OF_FIBRIN_CLOT_CLOTTING_CASCADE	0.00235051	0.0467979	0.431708	-0.61264	-1.76061	29
REACTOME_GLYCEROPHOSPHOLIPID_BIOSYNTHESIS	0.000276134	0.0126867	0.498493	-0.473726	-1.68923	103
REACTOME_GLYCOSAMINOGLYCAN_METABOLISM	0.0016504	0.0370253	0.45506	-0.439166	-1.58758	109
REACTOME_HDL_REMODELING	0.00100437	0.0292432	0.45506	-0.84754	-1.81953	9
REACTOME_INNATE_IMMUNE_SYSTEM	0.000122775	0.00701635	0.518848	-0.310407	-1.365	745
REACTOME_INTERLEUKIN_4_AND_INTERLEUKIN_13_SIGNALING	0.00144716	0.0338194	0.45506	-0.480221	-1.64353	75
REACTOME_IRE1ALPHA_ACTIVATES_CHAPERONES	3.66884e-05	0.00297949	0.557332	-0.620608	-1.97804	50
REACTOME_METABOLISM_OF_AMINE_DERIVED_HORMONES	0.00178167	0.03872	0.45506	-0.823605	-1.81205	10
REACTOME_METABOLISM_OF_AMINO_ACIDS_AND_DERIVATIVES	1.10086e-06	0.000188737	0.643552	-0.411153	-1.67916	317
REACTOME_METABOLISM_OF_CARBOHYDRATES	0.00055395	0.0196493	0.477271	-0.368859	-1.47161	253
REACTOME_METABOLISM_OF_FAT_SOLUBLE_VITAMINS	5.61825e-05	0.00394045	0.557332	-0.644376	-1.9737	41
REACTOME_METABOLISM_OF_LIPIDS	3.47736e-12	5.36556e-09	0.898671	-0.41229	-1.78311	615
REACTOME_METABOLISM_OF_RNA	1.56416e-06	0.000254053	0.643552	0.328538	1.48993	684
REACTOME_METABOLISM_OF_STEROIDS	1.86705e-08	5.76171e-06	0.733762	-0.553812	-2.05742	127
REACTOME_METABOLISM_OF_VITAMINS_AND_COFACTORS	3.04279e-08	8.5364e-06	0.719513	-0.516533	-1.96519	165
REACTOME_METABOLISM_OF_WATER_SOLUBLE_VITAMINS_AND_COFACTORS	0.000145607	0.00761596	0.518848	-0.476487	-1.71084	107
REACTOME_MITOTIC_PROMETAPHASE	0.00145754	0.0338194	0.45506	0.369609	1.50515	195
REACTOME_MRNA_SPLICING	3.14871e-10	2.42923e-07	0.814036	0.501135	2.05564	209
REACTOME_NEUTROPHIL_DEGRANULATION	2.48835e-05	0.00225855	0.57561	-0.37388	-1.54184	355
REACTOME_NFE2L2_REGULATING_ANTI_OXIDANT_DETOXIFICATION_ENZYMES	0.000143031	0.00761596	0.518848	-0.780127	-1.95502	16
REACTOME_NGF_STIMULATED_TRANSCRIPTION	0.00128925	0.0318291	0.45506	-0.618038	-1.82211	34
REACTOME_PEROXISOMAL_LIPID_METABOLISM	0.0019441	0.0399967	0.45506	-0.647428	-1.83444	27
REACTOME_PEROXISOMAL_PROTEIN_IMPORT	9.17776e-05	0.00578012	0.538434	-0.579859	-1.89443	57
REACTOME_PLASMA_LIPOPROTEIN_ASSEMBLY	0.000173313	0.00876793	0.518848	-0.77065	-1.96938	17
REACTOME_PLASMA_LIPOPROTEIN_ASSEMBLY_REMODELING_AND_CLEARANCE	1.47077e-08	5.04311e-06	0.74774	-0.666555	-2.2321	64
REACTOME_PLASMA_LIPOPROTEIN_CLEARANCE	0.000198845	0.00966168	0.518848	-0.634332	-1.88443	35
REACTOME_PLASMA_LIPOPROTEIN_REMODELING	2.45816e-06	0.000361232	0.627257	-0.770738	-2.17195	26
REACTOME_PROCESSING_OF_CAPPED_INTRON_CONTAINING_PRE_MRNA	5.56766e-11	5.72727e-08	0.851339	0.474721	1.99442	277
REACTOME_PROTEIN_LOCALIZATION	0.000989644	0.0292432	0.45506	-0.408028	-1.53889	150
REACTOME_RA_BIOSYNTHESIS_PATHWAY	0.000676894	0.0234707	0.477271	-0.751802	-1.85395	15
REACTOME_RECRUITMENT_OF_MITOTIC_CENTROSOME_PROTEINS_AND_COMPLEXES	0.00219164	0.044496	0.431708	0.472475	1.68012	80
REACTOME_REGULATION_OF_CHOLESTEROL_BIOSYNTHESIS_BY_SREBP_SREBF	0.000372021	0.0155143	0.498493	-0.556402	-1.79071	55
REACTOME_REGULATION_OF_INSULIN_LIKE_GROWTH_FACTOR_IGF_TRANSPORT_AND_UPTAKE_BY_INSULIN_LIKE_GROWTH_FACTOR_BINDING_PROTEINS_IGFBPS	5.34239e-06	0.000686942	0.610527	-0.539576	-1.90655	99
REACTOME_REGULATION_OF_PLK1_ACTIVITY_AT_G2_M_TRANSITION	0.000708738	0.0237735	0.477271	0.476709	1.70886	86
REACTOME_REGULATION_OF_TLR_BY_ENDOGENOUS_LIGAND	0.00110124	0.0302875	0.45506	-0.833448	-1.8337	10
REACTOME_RESPONSE_OF_EIF2AK1_HRI_TO_HEME_DEFICIENCY	0.00186357	0.039662	0.45506	-0.723235	-1.7835	15
REACTOME_RESPONSE_TO_ELEVATED_PLATELET_CYTOSOLIC_CA2	0.00120923	0.0313349	0.45506	-0.450922	-1.64604	115
REACTOME_RNA_POLYMERASE_II_TRANSCRIPTION_TERMINATION	0.00143509	0.0338067	0.45506	0.495766	1.69533	66
REACTOME_SIGNALING_BY_RECEPTOR_TYROSINE_KINASES	0.000703139	0.0237735	0.477271	-0.331803	-1.40482	461
REACTOME_SLC_MEDIATED_TRANSMEMBRANE_TRANSPORT	7.50127e-06	0.00091182	0.610527	-0.45455	-1.74574	179
REACTOME_SYNTHESIS_OF_BILE_ACIDS_AND_BILE_SALTS	0.00041851	0.0163833	0.498493	-0.684789	-1.9403	27
REACTOME_SYNTHESIS_OF_BILE_ACIDS_AND_BILE_SALTS_VIA_27_HYDROXYCHOLESTEROL	0.00241514	0.0474722	0.431708	-0.775	-1.7602	11
REACTOME_SYNTHESIS_OF_BILE_ACIDS_AND_BILE_SALTS_VIA_7ALPHA_HYDROXYCHOLESTEROL	0.00148459	0.03419	0.45506	-0.730121	-1.88975	18
REACTOME_SYNTHESIS_OF_PIPS_AT_THE_PLASMA_MEMBRANE	0.00188999	0.0397839	0.45506	0.550468	1.77205	49
REACTOME_SYNTHESIS_OF_VERY_LONG_CHAIN_FATTY_ACYL_COAS	4.1517e-05	0.00318536	0.557332	-0.773468	-2.03466	19
REACTOME_THYROXINE_BIOSYNTHESIS	0.00232961	0.0466829	0.431708	-0.844018	-1.76234	8
REACTOME_TRANSPORT_OF_BILE_SALTS_AND_ORGANIC_ACIDS_METAL_IONS_AND_AMINE_COMPOUNDS	9.72382e-05	0.00588386	0.538434	-0.584431	-1.88092	55
REACTOME_TRANSPORT_OF_MATURE_TRANSCRIPT_TO_CYTOPLASM	0.00093447	0.0285522	0.477271	0.471786	1.67927	81
REACTOME_TRANSPORT_OF_SMALL_MOLECULES	1.32086e-09	6.79361e-07	0.788187	-0.395072	-1.7031	567
REACTOME_TRANSPORT_TO_THE_GOLGI_AND_SUBSEQUENT_MODIFICATION	0.000378255	0.0155639	0.498493	-0.422331	-1.61122	169
REACTOME_TRYPTOPHAN_CATABOLISM	0.00255826	0.0487333	0.431708	-0.773407	-1.75658	11
REACTOME_TYSND1_CLEAVES_PEROXISOMAL_PROTEINS	0.00198307	0.0405281	0.431708	-0.842777	-1.69194	7
REACTOME_UNFOLDED_PROTEIN_RESPONSE_UPR	3.91509e-06	0.000525303	0.610527	-0.548931	-1.9261	89
REACTOME_VISUAL_PHOTOTRANSDUCTION	1.18572e-05	0.00133739	0.593325	-0.564598	-1.92001	72
WP_ADIPOGENESIS	6.41946e-05	0.00440232	0.538434	-0.4827	-1.76259	113
WP_ALANINE_AND_ASPARTATE_METABOLISM	0.00075013	0.0246266	0.477271	-0.876827	-1.83085	8
WP_AMINO_ACID_METABOLISM	0.000419405	0.0163833	0.498493	-0.524155	-1.78122	71
WP_AMINO_ACID_METABOLISM_PATHWAY_EXCERPT_HISTIDINE_CATABOLISM_EXTENSION	0.00138161	0.0332863	0.45506	-0.942324	-1.61644	4
WP_BLADDER_CANCER	0.000902179	0.0284094	0.477271	-0.605911	-1.83036	37
WP_CHOLESTEROL_BIOSYNTHESIS_PATHWAY	0.0009792	0.0292432	0.45506	-0.740266	-1.8255	15
WP_CHOLESTEROL_METABOLISM	7.61563e-10	4.70037e-07	0.801216	-0.693408	-2.32202	64
WP_CHOLESTEROL_METABOLISM_WITH_BLOCH_AND_KANDUTSCHRUSSELL_PATHWAYS	2.58538e-07	5.31898e-05	0.674963	-0.693291	-2.16605	45
WP_CILIOPATHIES	5.42618e-05	0.00394045	0.557332	0.443611	1.75242	149
WP_COMPLEMENT_SYSTEM	2.34726e-05	0.00219504	0.57561	-0.605776	-1.9791	57
WP_COVID19_THROMBOSIS_AND_ANTICOAGULATION	0.00126792	0.0315549	0.45506	-0.894127	-1.74367	6
WP_FAMILIAL_HYPERLIPIDEMIA_TYPE_1	0.000506337	0.0190556	0.477271	-0.790557	-1.87012	13
WP_FAMILIAL_HYPERLIPIDEMIA_TYPE_3	0.000781076	0.0253726	0.477271	-0.803778	-1.86751	12
WP_FAMILIAL_HYPERLIPIDEMIA_TYPE_4	7.43747e-05	0.00488341	0.538434	-0.791326	-1.98308	16
WP_FAMILIAL_HYPERLIPIDEMIA_TYPE_5	0.00101369	0.0292432	0.45506	-0.792689	-1.84175	12
WP_FATTY_ACID_BIOSYNTHESIS	0.000523665	0.0193244	0.477271	-0.699951	-1.85262	21
WP_FERROPTOSIS	6.05202e-08	1.55638e-05	0.704976	-0.669393	-2.19774	59
WP_FOLATE_METABOLISM	7.1303e-07	0.000129436	0.659444	-0.674999	-2.1589	51
WP_GANGLIO_SERIES_SPHINGOLIPID_METABOLISM	0.00239799	0.0474371	0.431708	-0.772041	-1.79377	12
WP_GENES_RELATED_TO_PRIMARY_CILIUM_DEVELOPMENT_BASED_ON_CRISPR	9.98651e-05	0.00592661	0.538434	0.491684	1.80707	92
WP_GLUCOCORTICOID_BIOSYNTHESIS	0.000543037	0.0196493	0.477271	-0.880092	-1.76685	7
WP_IL18_SIGNALING_PATHWAY	0.00243517	0.0475628	0.431708	-0.36806	-1.4363	209
WP_IMMUNE_RESPONSE_TO_TUBERCULOSIS	0.000385352	0.0156473	0.498493	-0.690951	-1.8635	22
WP_LIPID_PARTICLES_COMPOSITION	0.00181162	0.038824	0.45506	-0.833988	-1.79044	9
WP_METABOLIC_PATHWAY_OF_LDL_HDL_AND_TG_INCLUDING_DISEASES	5.61827e-05	0.00394045	0.557332	-0.794761	-1.99169	16
WP_METAPATHWAY_BIOTRANSFORMATION_PHASE_I_AND_II	0.000398059	0.0159534	0.498493	-0.452747	-1.64996	118
WP_MRNA_PROCESSING	0.001204	0.0313349	0.45506	0.424517	1.62936	125
WP_NETWORK_MAP_OF_SARSCOV2_SIGNALING_PATHWAY	2.44077e-06	0.000361232	0.627257	-0.496327	-1.85313	142
WP_NRF2_PATHWAY	2.89177e-09	1.27486e-06	0.774939	-0.590731	-2.12104	107
WP_NUCLEAR_RECEPTORS_METAPATHWAY	6.06879e-15	1.87283e-11	0.996986	-0.55541	-2.19819	235
WP_OMEGA3_OMEGA6_FATTY_ACID_SYNTHESIS	0.00115482	0.0308654	0.45506	-0.776618	-1.87067	14
WP_OMEGA9_FATTY_ACID_SYNTHESIS	0.000309888	0.0134692	0.498493	-0.801438	-1.89586	13
WP_OXIDATIVE_STRESS_RESPONSE	0.0010674	0.0299454	0.45506	-0.672363	-1.89473	26
WP_PHOTODYNAMIC_THERAPYINDUCED_UNFOLDED_PROTEIN_RESPONSE	0.00155823	0.03562	0.45506	-0.648347	-1.81001	25
WP_PLURIPOTENT_STEM_CELL_DIFFERENTIATION_PATHWAY	0.00101394	0.0292432	0.45506	-0.617807	-1.80426	33
WP_PPAR_SIGNALING_PATHWAY	0.000143406	0.00761596	0.518848	-0.595825	-1.89467	49
WP_PPARALPHA_PATHWAY	0.00138884	0.0332863	0.45506	-0.680969	-1.80042	20
WP_PROXIMAL_TUBULE_TRANSPORT	0.00110904	0.0302875	0.45506	-0.566115	-1.75364	44
WP_SELENIUM_MICRONUTRIENT_NETWORK	1.07547e-07	2.37064e-05	0.704976	-0.628851	-2.13701	71
WP_SPHINGOLIPID_METABOLISM_IN_SENESCENCE	0.000308184	0.0134692	0.498493	-0.68784	-1.92027	25
WP_SPINAL_CORD_INJURY	0.000200372	0.00966168	0.518848	-0.497658	-1.74079	88
WP_STATIN_INHIBITION_OF_CHOLESTEROL_PRODUCTION	1.65815e-05	0.00170568	0.57561	-0.753036	-2.07346	24
WP_STEROL_REGULATORY_ELEMENTBINDING_PROTEINS_SREBP_SIGNALING	2.05541e-05	0.00199786	0.57561	-0.5693	-1.89756	65
WP_SYNTHESIS_OF_CERAMIDES_AND_1DEOXYCERAMIDES	0.00192087	0.0397839	0.45506	-0.690092	-1.81533	19
WP_TRANSSULFURATION_ONECARBON_METABOLISM_AND_RELATED_PATHWAYS	7.38629e-08	1.75339e-05	0.704976	-0.66692	-2.18963	59
WP_TRYPTOPHAN_METABOLISM	1.21344e-05	0.00133739	0.593325	-0.7483	-2.08905	25
WP_UREA_CYCLE_AND_METABOLISM_OF_AMINO_GROUPS	0.000928965	0.0285522	0.477271	-0.741976	-1.92043	18
WP_VEGFAVEGFR2_SIGNALING	0.00109634	0.0302875	0.45506	-0.327041	-1.37443	412
WP_VITAMIN_A_AND_CAROTENOID_METABOLISM	0.0012207	0.0313349	0.45506	-0.630706	-1.81253	29
WP_VITAMIN_B12_METABOLISM	4.15725e-05	0.00318536	0.557332	-0.669194	-1.98799	35
WP_ZINC_HOMEOSTASIS	0.000350631	0.0148225	0.498493	-0.701156	-1.90867	23
WP_ANGIOTENSIN_II_RECEPTOR_TYPE_1_PATHWAY	0.00270779	0.0512653	0.431708	-0.641072	-1.76517	24
REACTOME_PLATELET_ACTIVATION_SIGNALING_AND_AGGREGATION	0.00283836	0.0534096	0.431708	-0.364618	-1.4375	225
KEGG_STEROID_BIOSYNTHESIS	0.00293229	0.054479	0.431708	-0.698468	-1.78492	17
REACTOME_SYNTHESIS_OF_PE	0.00295043	0.054479	0.431708	-0.734667	-1.73791	13
WP_VITAMIN_B6DEPENDENT_AND_RESPONSIVE_DISORDERS	0.0029658	0.054479	0.431708	-0.830547	-1.66739	7
WP_GLUCOCORTICOID_RECEPTOR_PATHWAY	0.0029584	0.054479	0.431708	-0.513867	-1.65942	56
REACTOME_HSF1_DEPENDENT_TRANSACTIVATION	0.00302551	0.055247	0.431708	-0.585368	-1.70459	32
REACTOME_METABOLISM_OF_FOLATE_AND_PTERINES	0.00317639	0.0569903	0.431708	-0.705482	-1.76796	16
REACTOME_SIGNALING_BY_ERBB2_ECD_MUTANTS	0.00317639	0.0569903	0.431708	-0.704799	-1.76625	16
REACTOME_HIGHLY_SODIUM_PERMEABLE_POSTSYNAPTIC_ACETYLCHOLINE_NICOTINIC_RECEPTORS	0.00314466	0.0569903	0.431708	-0.925838	-1.58816	4
REACTOME_SIGNALING_BY_NTRKS	0.00321099	0.0572782	0.431708	-0.419888	-1.55187	124
WP_CHOLESTEROL_SYNTHESIS_DISORDERS	0.0032793	0.0574996	0.431708	-0.694782	-1.7755	17
REACTOME_DISEASES_OF_GLYCOSYLATION	0.00324602	0.0574996	0.431708	-0.408606	-1.51798	127
REACTOME_RECRUITMENT_OF_NUMA_TO_MITOTIC_CENTROSOMES	0.00327822	0.0574996	0.431708	0.44074	1.5978	88
WP_FATTY_ACID_BETAOXIDATION	0.00348053	0.059342	0.431708	-0.599663	-1.74794	31
KEGG_BUTANOATE_METABOLISM	0.00347639	0.059342	0.431708	-0.610853	-1.74061	28
REACTOME_N_GLYCAN_TRIMMING_IN_THE_ER_AND_CALNEXIN_CALRETICULIN_CYCLE	0.00343804	0.059342	0.431708	-0.58706	-1.73078	34
WP_LINOLEIC_ACID_METABOLISM_AFFECTED_BY_SARSCOV2	0.00347503	0.059342	0.431708	-0.872556	-1.7016	6
REACTOME_ANCHORING_OF_THE_BASAL_BODY_TO_THE_PLASMA_MEMBRANE	0.00342573	0.059342	0.431708	0.439866	1.61779	95
WP_NOTCH1_REGULATION_OF_ENDOTHELIAL_CELL_CALCIFICATION	0.00353553	0.0596468	0.431708	-0.705748	-1.74038	15
REACTOME_SUMOYLATION_OF_DNA_DAMAGE_RESPONSE_AND_REPAIR_PROTEINS	0.00353706	0.0596468	0.431708	0.453606	1.58292	75
BIOCARTA_BTG2_PATHWAY	0.00361693	0.0603343	0.431708	-0.801276	-1.76292	10
WP_OXYSTEROLS_DERIVED_FROM_CHOLESTEROL	0.00361406	0.0603343	0.431708	-0.609581	-1.73699	28
REACTOME_HIGHLY_CALCIUM_PERMEABLE_POSTSYNAPTIC_NICOTINIC_ACETYLCHOLINE_RECEPTORS	0.00365957	0.0607173	0.431708	-0.920665	-1.57929	4
KEGG_PROXIMAL_TUBULE_BICARBONATE_RECLAMATION	0.00368251	0.0607712	0.431708	-0.705815	-1.82684	18
WP_UREA_CYCLE_AND_ASSOCIATED_PATHWAYS	0.00390032	0.0640233	0.431708	-0.640624	-1.69559	21
WP_TYPE_I_INTERFERON_INDUCTION_AND_SIGNALING_DURING_SARSCOV2_INFECTION	0.00397536	0.0649098	0.407018	-0.63042	-1.78625	27
REACTOME_METABOLIC_DISORDERS_OF_BIOLOGICAL_OXIDATION_ENZYMES	0.00421012	0.0677259	0.407018	-0.629167	-1.73239	24
WP_HYPERTROPHY_MODEL	0.00423561	0.0677259	0.407018	-0.700856	-1.72832	15
KEGG_CYSTEINE_AND_METHIONINE_METABOLISM	0.00423359	0.0677259	0.407018	-0.603428	-1.71946	28
KEGG_OLFACTORY_TRANSDUCTION	0.00418143	0.0677259	0.407018	0.594044	1.72678	29
WP_DISORDERS_OF_GALACTOSE_METABOLISM	0.00437625	0.0696139	0.407018	-0.7973	-1.75417	10
WP_DISORDERS_OF_BILE_ACID_SYNTHESIS_AND_BILIARY_TRANSPORT	0.00440204	0.0696651	0.407018	-0.723215	-1.71082	13
REACTOME_BETA_OXIDATION_OF_PRISTANOYL_COA	0.00447337	0.0697436	0.407018	-0.807154	-1.73283	9
KEGG_PENTOSE_AND_GLUCURONATE_INTERCONVERSIONS	0.0044748	0.0697436	0.407018	-0.720952	-1.70547	13
REACTOME_PI_METABOLISM	0.0044698	0.0697436	0.407018	0.448125	1.56379	75
PID_TCPTP_PATHWAY	0.00468676	0.0726801	0.407018	-0.557164	-1.70657	41
REACTOME_ERCC6_CSB_AND_EHMT2_G9A_POSITIVELY_REGULATE_RRNA_EXPRESSION	0.004775	0.0736782	0.407018	0.690173	1.75797	16
REACTOME_ACTIVATION_OF_GENE_EXPRESSION_BY_SREBF_SREBP	0.00481193	0.0738786	0.407018	-0.536103	-1.64096	42
WP_SREBF_AND_MIR33_IN_CHOLESTEROL_AND_LIPID_HOMEOSTASIS	0.00490276	0.0749006	0.407018	-0.687365	-1.72256	16
WP_ONECARBON_METABOLISM	0.0050001	0.0760114	0.407018	-0.593027	-1.70425	29
REACTOME_PTK6_REGULATES_CELL_CYCLE	0.00505026	0.0763976	0.407018	-0.85936	-1.67587	6
REACTOME_POST_TRANSLATIONAL_PROTEIN_MODIFICATION	0.00507655	0.0764206	0.407018	-0.268666	-1.20913	1219
WP_MEASLES_VIRUS_INFECTION	0.00529544	0.0793288	0.407018	-0.416697	-1.48588	103
REACTOME_RUNX1_INTERACTS_WITH_CO_FACTORS_WHOSE_PRECISE_EFFECT_ON_RUNX1_TARGETS_IS_NOT_KNOWN	0.00561265	0.0836745	0.407018	0.560544	1.71352	36
KEGG_PRIMARY_BILE_ACID_BIOSYNTHESIS	0.00564517	0.0837548	0.407018	-0.750826	-1.7053	11
REACTOME_NA_CL_DEPENDENT_NEUROTRANSMITTER_TRANSPORTERS	0.00574927	0.0848911	0.407018	-0.810996	-1.62814	7
REACTOME_SYNTHESIS_OF_DOLICHYL_PHOSPHATE	0.00583823	0.0857942	0.407018	-0.856401	-1.6701	6
REACTOME_ORGANELLE_BIOGENESIS_AND_MAINTENANCE	0.00587364	0.0859054	0.407018	0.331102	1.38411	256
WP_METHIONINE_METABOLISM_LEADING_TO_SULFUR_AMINO_ACIDS_AND_RELATED_DISORDERS	0.00596758	0.0868677	0.407018	-0.785544	-1.72831	10
BIOCARTA_P27_PATHWAY	0.00600275	0.0869695	0.407018	-0.71422	-1.68954	13
REACTOME_METABOLISM_OF_INGESTED_SEMET_SEC_MESEC_INTO_H2SE	0.00603144	0.0869767	0.407018	-0.810339	-1.62682	7
KEGG_RENIN_ANGIOTENSIN_SYSTEM	0.00614855	0.0878446	0.407018	-0.748188	-1.6993	11
PID_IL6_7_PATHWAY	0.00612835	0.0878446	0.407018	-0.527717	-1.62103	43
REACTOME_ZINC_TRANSPORTERS	0.00636655	0.0901247	0.407018	-0.713517	-1.68788	13
REACTOME_SNRNP_ASSEMBLY	0.00635245	0.0901247	0.407018	0.487757	1.60089	53
PID_REG_GR_PATHWAY	0.00643379	0.0906606	0.407018	-0.475045	-1.59079	64
BIOCARTA_CELLCYCLE_PATHWAY	0.00650524	0.0912508	0.407018	-0.629905	-1.66541	20
WP_1Q211_COPY_NUMBER_VARIATION_SYNDROME	0.00654743	0.0914271	0.407018	0.608427	1.69798	24
WP_METHYLATION_PATHWAYS	0.00665365	0.0924917	0.407018	-0.816536	-1.70496	8
WP_HEAD_AND_NECK_SQUAMOUS_CELL_CARCINOMA	0.00686807	0.0950442	0.407018	-0.456819	-1.54229	69
BIOCARTA_ARENRF2_PATHWAY	0.0069871	0.0962598	0.407018	-0.62679	-1.65718	20
REACTOME_CALNEXIN_CALRETICULIN_CYCLE	0.00716253	0.098238	0.407018	-0.598449	-1.67071	25
KEGG_METABOLISM_OF_XENOBIOTICS_BY_CYTOCHROME_P450	0.00727025	0.0992743	0.407018	-0.536633	-1.62086	38
KEGG_GLYCEROPHOSPHOLIPID_METABOLISM	0.00731192	0.0994035	0.407018	-0.453082	-1.51019	65
BIOCARTA_PML_PATHWAY	0.00738519	0.0999592	0.407018	-0.707158	-1.67284	13
REACTOME_REGULATION_OF_TP53_ACTIVITY_THROUGH_ACETYLATION	0.00784507	0.10572	0.38073	0.573285	1.66644	29
REACTOME_MECP2_REGULATES_NEURONAL_RECEPTORS_AND_CHANNELS	0.00788063	0.105738	0.38073	0.672067	1.71185	16
KEGG_BLADDER_CANCER	0.00807062	0.107818	0.38073	-0.532269	-1.60768	38
WP_RAS_AND_BRADYKININ_PATHWAYS_IN_COVID19	0.00824723	0.109256	0.38073	-0.680046	-1.76015	18
WP_EBOLA_VIRUS_INFECTION_IN_HOST	0.00824906	0.109256	0.38073	-0.414636	-1.5048	111
WP_KETOGENESIS_AND_KETOLYSIS	0.0084201	0.111045	0.38073	-0.807633	-1.68637	8
BIOCARTA_FBW7_PATHWAY	0.00857274	0.112099	0.38073	-0.787819	-1.69132	9
REACTOME_SERINE_BIOSYNTHESIS	0.00856161	0.112099	0.38073	-0.806195	-1.68336	8
REACTOME_MATURATION_OF_SARS_COV_1_SPIKE_PROTEIN	0.00884756	0.114819	0.38073	-0.887265	-1.63525	5
PID_PTP1B_PATHWAY	0.00885513	0.114819	0.38073	-0.509189	-1.56412	43
KEGG_RETINOL_METABOLISM	0.00894602	0.115026	0.38073	-0.605019	-1.71428	27
REACTOME_CELL_SURFACE_INTERACTIONS_AT_THE_VASCULAR_WALL	0.00892975	0.115026	0.38073	-0.417774	-1.4775	94
WP_ALSTROM_SYNDROME	0.00902016	0.115026	0.38073	0.547605	1.65965	34
REACTOME_TRANSCRIPTIONAL_REGULATION_BY_E2F6	0.00902016	0.115026	0.38073	0.547833	1.66034	34
REACTOME_PHASE_II_CONJUGATION_OF_COMPOUNDS	0.009076	0.115262	0.38073	-0.452414	-1.5527	76
WP_BIOMARKERS_FOR_UREA_CYCLE_DISORDERS	0.00940909	0.118516	0.38073	-0.783333	-1.68169	9
WP_EXERCISEINDUCED_CIRCADIAN_REGULATION	0.00940458	0.118516	0.38073	-0.511283	-1.58379	44
KEGG_PROPANOATE_METABOLISM	0.00947749	0.118892	0.38073	-0.575859	-1.6409	28
REACTOME_SULFUR_AMINO_ACID_METABOLISM	0.00962891	0.119231	0.38073	-0.601751	-1.70502	27
REACTOME_INTERFERON_ALPHA_BETA_SIGNALING	0.00960254	0.119231	0.38073	-0.490069	-1.56742	51
REACTOME_NUCLEAR_EVENTS_KINASE_AND_TRANSCRIPTION_FACTOR_ACTIVATION	0.00962891	0.119231	0.38073	-0.482716	-1.55883	56
REACTOME_TCF_DEPENDENT_SIGNALING_IN_RESPONSE_TO_WNT	0.00965905	0.119231	0.38073	0.35704	1.41734	156
WP_FGF23_SIGNALING_IN_HYPOPHOSPHATEMIC_RICKETS_AND_RELATED_DISORDERS	0.00977944	0.120236	0.38073	-0.674838	-1.66416	15
WP_FAMILIAL_HYPERLIPIDEMIA_TYPE_2	0.0099487	0.121832	0.38073	-0.707369	-1.70386	14
REACTOME_RAB_GEFS_EXCHANGE_GTP_FOR_GDP_ON_RABS	0.0100472	0.122131	0.38073	0.410834	1.48817	89
REACTOME_G_PROTEIN_BETA_GAMMA_SIGNALLING	0.0100523	0.122131	0.38073	0.607257	1.71127	26
WP_COMPLEMENT_AND_COAGULATION_CASCADES	0.0102693	0.124279	0.38073	-0.511656	-1.55864	39
REACTOME_DRUG_ADME	0.0105309	0.126947	0.38073	-0.444889	-1.50201	69
REACTOME_CHOLESTEROL_BIOSYNTHESIS	0.0106817	0.127296	0.38073	-0.607432	-1.71176	26
WP_TYPE_II_INTERFERON_SIGNALING	0.0106836	0.127296	0.38073	-0.596877	-1.60978	22
PID_INTEGRIN3_PATHWAY	0.0106618	0.127296	0.38073	-0.509946	-1.55344	39
BIOCARTA_STEM_PATHWAY	0.0107717	0.127852	0.38073	-0.893211	-1.5322	4
WP_GENE_REGULATORY_NETWORK_MODELLING_SOMITOGENESIS	0.0108703	0.128527	0.38073	-0.83592	-1.63016	6
KEGG_ARACHIDONIC_ACID_METABOLISM	0.010979	0.129317	0.38073	-0.543768	-1.58345	32
WP_GLYCEROLIPIDS_AND_GLYCEROPHOSPHOLIPIDS	0.0110877	0.130102	0.38073	-0.60776	-1.60861	21
WP_EXTRAFOLLICULAR_AND_FOLLICULAR_B_CELL_ACTIVATION_BY_SARSCOV2	0.0112552	0.131566	0.38073	-0.543465	-1.58257	32
WP_SERINE_METABOLISM	0.0113918	0.131757	0.38073	-0.798215	-1.6667	8
WP_7OXOC_AND_7BETAHC_PATHWAYS	0.0113702	0.131757	0.38073	-0.606496	-1.60526	21
WP_PI3KAKT_SIGNALING_PATHWAY	0.0113996	0.131757	0.38073	-0.327498	-1.31429	265
WP_ALTERNATIVE_PATHWAY_OF_FETAL_ANDROGEN_SYNTHESIS	0.0114462	0.131802	0.38073	-0.834388	-1.62717	6
REACTOME_MRNA_SPLICING_MINOR_PATHWAY	0.0115359	0.132342	0.38073	0.472076	1.52563	50
WP_AMINO_ACID_METABOLISM_IN_TRIPLENEGATIVE_BREAST_CANCER_CELLS	0.0116971	0.133694	0.38073	-0.789426	-1.58483	7
REACTOME_HEMOSTASIS	0.0118236	0.134145	0.38073	-0.299431	-1.26986	475
REACTOME_HDACS_DEACETYLATE_HISTONES	0.0118166	0.134145	0.38073	0.530564	1.58362	32
REACTOME_SYNTHESIS_OF_PC	0.011891	0.134416	0.38073	-0.603859	-1.70169	26
REACTOME_ALPHA_LINOLENIC_OMEGA3_AND_LINOLEIC_OMEGA6_ACID_METABOLISM	0.0120176	0.135351	0.38073	-0.718591	-1.66959	12
BIOCARTA_CARDIACEGF_PATHWAY	0.0121256	0.136072	0.38073	-0.652543	-1.66756	17
REACTOME_TRANSCRIPTIONAL_REGULATION_OF_TESTIS_DIFFERENTIATION	0.0122014	0.136426	0.38073	0.819264	1.60138	6
BIOCARTA_EEA1_PATHWAY	0.0126896	0.140863	0.38073	-0.785823	-1.5776	7
REACTOME_DEATH_RECEPTOR_SIGNALING	0.0126681	0.140863	0.38073	0.357404	1.40741	147
KEGG_SELENOAMINO_ACID_METABOLISM	0.0130022	0.14244	0.38073	-0.586953	-1.61615	24
REACTOME_PHASE_I_FUNCTIONALIZATION_OF_COMPOUNDS	0.0129598	0.14244	0.38073	-0.470788	-1.56884	63
REACTOME_BIOSYNTHESIS_OF_THE_N_GLYCAN_PRECURSOR_DOLICHOL_LIPID_LINKED_OLIGOSACCHARIDE_LLO_AND_TRANSFER_TO_A_NASCENT_PROTEIN	0.0130624	0.14244	0.38073	-0.426361	-1.4592	75
REACTOME_CYTOKINE_SIGNALING_IN_IMMUNE_SYSTEM	0.0129629	0.14244	0.38073	-0.29613	-1.26535	525
REACTOME_FORMATION_OF_THE_BETA_CATENIN_TCF_TRANSACTIVATING_COMPLEX	0.0130463	0.14244	0.38073	0.555455	1.61461	29
WP_GABA_METABOLISM_AKA_GHB	0.0133121	0.144651	0.38073	-0.773991	-1.66163	9
KEGG_NICOTINATE_AND_NICOTINAMIDE_METABOLISM	0.0134898	0.146068	0.38073	-0.607483	-1.60613	20
WP_MIRNA_REGULATION_OF_P53_PATHWAY_IN_PROSTATE_CANCER	0.0135908	0.146648	0.38073	-0.594937	-1.61952	23
BIOCARTA_TID_PATHWAY	0.0137193	0.146958	0.38073	-0.661328	-1.63084	15
PID_HNF3B_PATHWAY	0.013787	0.146958	0.38073	-0.52985	-1.57404	35
WP_MRNA_VACCINE_ACTIVATION_OF_DENDRITIC_CELL_AND_INDUCTION_OF_IFN1	0.0138238	0.146958	0.38073	-0.782444	-1.57082	7
WP_ENDOMETRIAL_CANCER	0.0138576	0.146958	0.38073	-0.455036	-1.50832	62
REACTOME_MITOTIC_G2_G2_M_PHASES	0.0137214	0.146958	0.38073	0.336214	1.36478	188
REACTOME_INTERFERON_GAMMA_SIGNALING	0.0140669	0.148666	0.38073	-0.437654	-1.47758	69
REACTOME_COMMON_PATHWAY_OF_FIBRIN_CLOT_FORMATION	0.0143092	0.149018	0.38073	-0.658239	-1.7037	18
REACTOME_CARGO_CONCENTRATION_IN_THE_ER	0.014348	0.149018	0.38073	-0.563394	-1.61909	29
KEGG_HEMATOPOIETIC_CELL_LINEAGE	0.0142808	0.149018	0.38073	-0.53654	-1.60495	36
BIOCARTA_MSP_PATHWAY	0.01439	0.149018	0.38073	-0.942885	-1.49795	3
KEGG_N_GLYCAN_BIOSYNTHESIS	0.0143185	0.149018	0.38073	-0.471859	-1.47423	45
REACTOME_SUMOYLATION_OF_DNA_REPLICATION_PROTEINS	0.0143663	0.149018	0.38073	0.463438	1.47859	45
BIOCARTA_EXTRINSIC_PATHWAY	0.0145508	0.149594	0.38073	-0.687394	-1.62608	13
REACTOME_GAB1_SIGNALOSOME	0.0148433	0.149594	0.38073	-0.686975	-1.62509	13
BIOCARTA_LONGEVITY_PATHWAY	0.0148433	0.149594	0.38073	-0.685932	-1.62262	13
WP_OVERVIEW_OF_INTERFERONSMEDIATED_SIGNALING_PATHWAY	0.0148477	0.149594	0.38073	-0.65654	-1.61903	15
REACTOME_P130CAS_LINKAGE_TO_MAPK_SIGNALING_FOR_INTEGRINS	0.0148477	0.149594	0.38073	-0.656155	-1.61808	15
REACTOME_TRANSPORT_OF_INORGANIC_CATIONS_ANIONS_AND_AMINO_ACIDS_OLIGOPEPTIDES	0.0148818	0.149594	0.38073	-0.4289	-1.4812	79
REACTOME_CELLULAR_RESPONSE_TO_CHEMICAL_STRESS	0.0148361	0.149594	0.38073	-0.353195	-1.36112	182
WP_BARDETBIEDL_SYNDROME	0.0145936	0.149594	0.38073	0.413772	1.46069	78
REACTOME_MECP2_REGULATES_TRANSCRIPTION_OF_NEURONAL_LIGANDS	0.0148105	0.149594	0.38073	0.810668	1.58458	6
REACTOME_REGULATION_OF_LIPID_METABOLISM_BY_PPARALPHA	0.0150131	0.150423	0.38073	-0.401446	-1.45692	111
WP_LIVER_X_RECEPTOR_PATHWAY	0.0151924	0.151727	0.38073	-0.821312	-1.60167	6
REACTOME_COLLAGEN_BIOSYNTHESIS_AND_MODIFYING_ENZYMES	0.0153132	0.15244	0.38073	-0.450739	-1.48639	60
REACTOME_SYNTHESIS_OF_BILE_ACIDS_AND_BILE_SALTS_VIA_24_HYDROXYCHOLESTEROL	0.0153708	0.152521	0.38073	-0.70521	-1.6385	12
REACTOME_INTRAFLAGELLAR_TRANSPORT	0.0157105	0.155393	0.352488	0.461334	1.47188	45
REACTOME_BUTYROPHILIN_BTN_FAMILY_INTERACTIONS	0.0158391	0.156164	0.352488	0.783598	1.61594	7
REACTOME_SMALL_INTERFERING_RNA_SIRNA_BIOGENESIS	0.0161437	0.158661	0.352488	0.7748	1.70059	9
WP_MINERALOCORTICOID_BIOSYNTHESIS	0.0163129	0.158958	0.352488	-0.866165	-1.59636	5
PID_ERBB1_RECEPTOR_PROXIMAL_PATHWAY	0.016244	0.158958	0.352488	-0.523985	-1.55662	35
REACTOME_SIGNALING_BY_WNT	0.0163285	0.158958	0.352488	0.317304	1.31749	239
BIOCARTA_KERATINOCYTE_PATHWAY	0.0164596	0.159515	0.352488	-0.491697	-1.51038	43
PID_CMYB_PATHWAY	0.0164891	0.159515	0.352488	-0.449265	-1.49853	66
WP_MITOCHONDRIAL_LONG_CHAIN_FATTY_ACID_BETAOXIDATION	0.016764	0.160166	0.352488	-0.640812	-1.63758	17
WP_GLUCURONIDATION	0.0167038	0.160166	0.352488	-0.716344	-1.62698	11
BIOCARTA_EIF4_PATHWAY	0.0167307	0.160166	0.352488	-0.577731	-1.59076	24
KEGG_GLUTATHIONE_METABOLISM	0.0167572	0.160166	0.352488	-0.492795	-1.52652	44
WP_CYSTEINE_AND_METHIONINE_CATABOLISM	0.0171102	0.162468	0.352488	-0.650728	-1.6047	15
REACTOME_SENSORY_PERCEPTION	0.017072	0.162468	0.352488	-0.360082	-1.36403	163
REACTOME_CELL_CYCLE	0.017265	0.163435	0.352488	0.266782	1.19813	602
PID_SHP2_PATHWAY	0.0174988	0.165141	0.352488	-0.468708	-1.4939	50
REACTOME_SCAVENGING_BY_CLASS_F_RECEPTORS	0.0177967	0.166112	0.352488	-0.815478	-1.59029	6
PID_FOXM1_PATHWAY	0.0178169	0.166112	0.352488	-0.526756	-1.57569	36
REACTOME_PEPTIDE_LIGAND_BINDING_RECEPTORS	0.0176857	0.166112	0.352488	-0.435011	-1.47829	71
REACTOME_SUMOYLATION_OF_RNA_BINDING_PROTEINS	0.0177703	0.166112	0.352488	0.478762	1.52775	46
REACTOME_OLFACTORY_SIGNALING_PATHWAY	0.017895	0.166337	0.352488	0.586279	1.56528	20
WP_TRYPTOPHAN_CATABOLISM_LEADING_TO_NAD_PRODUCTION	0.0179817	0.166642	0.352488	-0.683103	-1.64541	14
WP_QUERCETIN_AND_NFKB_AP1_INDUCED_APOPTOSIS	0.0182414	0.168542	0.352488	-0.64861	-1.59948	15
WP_GLYCOSYLATION_AND_RELATED_CONGENITAL_DEFECTS	0.0184319	0.169429	0.352488	-0.557556	-1.55655	25
SIG_CHEMOTAXIS	0.0184472	0.169429	0.352488	0.487003	1.52149	40
REACTOME_METAL_ION_SLC_TRANSPORTERS	0.0187705	0.171887	0.352488	-0.594886	-1.57283	20
WP_EICOSANOID_METABOLISM_VIA_LIPOOXYGENASES_LOX	0.0188784	0.172363	0.352488	-0.582646	-1.54214	21
BIOCARTA_RACCYCD_PATHWAY	0.0190385	0.172894	0.352488	-0.588092	-1.65725	26
WP_HAIR_FOLLICLE_DEVELOPMENT_ORGANOGENESIS_PART_2_OF_3	0.0190486	0.172894	0.352488	-0.553184	-1.57629	28
WP_METHIONINE_DE_NOVO_AND_SALVAGE_PATHWAY	0.0193267	0.174903	0.352488	-0.592373	-1.56618	20
REACTOME_UREA_CYCLE	0.0195203	0.176139	0.352488	-0.769317	-1.54446	7
REACTOME_THE_CANONICAL_RETINOID_CYCLE_IN_RODS_TWILIGHT_VISION	0.0199957	0.179663	0.352488	-0.676866	-1.63039	14
KEGG_DRUG_METABOLISM_CYTOCHROME_P450	0.0200273	0.179663	0.352488	-0.51415	-1.55316	37
REACTOME_PENTOSE_PHOSPHATE_PATHWAY	0.0201339	0.179849	0.352488	-0.677098	-1.60173	13
KEGG_PROSTATE_CANCER	0.0201645	0.179849	0.352488	-0.408443	-1.41952	84
WP_DISORDERS_OF_FOLATE_METABOLISM_AND_TRANSPORT	0.0202881	0.18043	0.352488	-0.602604	-1.58519	19
PID_CD8_TCR_DOWNSTREAM_PATHWAY	0.020439	0.181249	0.352488	-0.521878	-1.5241	33
BIOCARTA_NUCLEARRS_PATHWAY	0.0210695	0.183102	0.352488	-0.640193	-1.57872	15
WP_NUCLEAR_RECEPTORS_IN_LIPID_METABOLISM_AND_TOXICITY	0.0210695	0.183102	0.352488	-0.640193	-1.57872	15
REACTOME_EGR2_AND_SOX10_MEDIATED_INITIATION_OF_SCHWANN_CELL_MYELINATION	0.0211226	0.183102	0.352488	-0.550194	-1.536	25
REACTOME_CHONDROITIN_SULFATE_DERMATAN_SULFATE_METABOLISM	0.0208161	0.183102	0.352488	-0.479961	-1.51626	48
REACTOME_INTEGRIN_CELL_SURFACE_INTERACTIONS	0.0207494	0.183102	0.352488	-0.428756	-1.46142	73
REACTOME_NUCLEAR_EVENTS_MEDIATED_BY_NFE2L2	0.0209767	0.183102	0.352488	-0.4158	-1.42305	75
WP_GASTRIN_SIGNALING_PATHWAY	0.0210138	0.183102	0.352488	-0.393842	-1.41047	106
REACTOME_KEAP1_NFE2L2_PATHWAY	0.0210883	0.183102	0.352488	-0.395965	-1.40931	101
REACTOME_RAB_REGULATION_OF_TRAFFICKING	0.0212451	0.183648	0.352488	0.364516	1.38596	120
WP_DISORDERS_IN_KETOLYSIS	0.0213095	0.183691	0.352488	-0.85698	-1.57943	5
REACTOME_GRB2_SOS_PROVIDES_LINKAGE_TO_MAPK_SIGNALING_FOR_INTEGRINS	0.0219179	0.187767	0.352488	-0.638203	-1.57381	15
BIOCARTA_PPARA_PATHWAY	0.0218905	0.187767	0.352488	-0.477028	-1.507	48
KEGG_RIBOFLAVIN_METABOLISM	0.021965	0.187767	0.352488	0.711793	1.66958	11
SA_REG_CASCADE_OF_CYCLIN_EXPR	0.0220613	0.188069	0.352488	-0.732451	-1.6115	10
REACTOME_PLATELET_AGGREGATION_PLUG_FORMATION	0.02225	0.188732	0.352488	-0.514227	-1.52763	35
REACTOME_PERK_REGULATES_GENE_EXPRESSION	0.0222614	0.188732	0.352488	-0.509818	-1.47786	30
REACTOME_MET_ACTIVATES_RAP1_AND_RAC1	0.0225137	0.190218	0.352488	-0.707055	-1.60588	11
WP_EICOSANOID_METABOLISM_VIA_CYCLOOXYGENASES_COX	0.0225689	0.190218	0.352488	-0.573361	-1.51756	21
WP_HOSTPATHOGEN_INTERACTION_OF_HUMAN_CORONAVIRUSES_INTERFERON_INDUCTION	0.0226215	0.190218	0.352488	-0.510207	-1.48573	32
KEGG_ADHERENS_JUNCTION	0.0229258	0.192253	0.352488	-0.424122	-1.44128	71
REACTOME_ATF4_ACTIVATES_GENES_IN_RESPONSE_TO_ENDOPLASMIC_RETICULUM_STRESS	0.0230062	0.192404	0.352488	-0.547918	-1.52964	25
WP_FOXA2_PATHWAY	0.0230928	0.192606	0.352488	-0.633978	-1.64091	18
WP_GLYOXYLATE_METABOLISM	0.0231806	0.192818	0.352488	-0.766215	-1.59988	8
WP_METABOLISM_OF_ALPHALINOLENIC_ACID	0.023367	0.193747	0.352488	-0.852676	-1.5715	5
WP_2Q13_COPY_NUMBER_VARIATION_SYNDROME	0.023418	0.193747	0.352488	-0.479695	-1.47352	43
REACTOME_SIGNALING_BY_MRAS_COMPLEX_MUTANTS	0.0237298	0.195802	0.352488	0.770099	1.65408	8
PID_TCR_CALCIUM_PATHWAY	0.0239428	0.196601	0.352488	-0.630607	-1.63218	18
WP_PHOTODYNAMIC_THERAPYINDUCED_NFKB_SURVIVAL_SIGNALING	0.023954	0.196601	0.352488	-0.566287	-1.54154	23
KEGG_TYROSINE_METABOLISM	0.024054	0.196898	0.352488	-0.543844	-1.54967	28
REACTOME_CREB1_PHOSPHORYLATION_THROUGH_THE_ACTIVATION_OF_CAMKII_CAMKK_CAMKIV_CASCASDE	0.0243183	0.197544	0.352488	-0.765307	-1.59799	8
REACTOME_SYNTHESIS_OF_PROSTAGLANDINS_PG_AND_THROMBOXANES_TX	0.0242567	0.197544	0.352488	-0.698033	-1.58539	11
WP_ARYL_HYDROCARBON_RECEPTOR_PATHWAY_WP2873	0.024332	0.197544	0.352488	-0.542179	-1.54493	28
REACTOME_SUMOYLATION_OF_CHROMATIN_ORGANIZATION_PROTEINS	0.024389	0.197544	0.352488	0.442256	1.47585	56
BIOCARTA_EPHA4_PATHWAY	0.0246496	0.199132	0.352488	-0.760503	-1.52677	7
WP_UREA_CYCLE_AND_RELATED_DISEASES	0.025031	0.200146	0.352488	-0.794653	-1.54968	6
BIOCARTA_IFNA_PATHWAY	0.0249345	0.200146	0.352488	-0.759829	-1.52541	7
REACTOME_SEROTONIN_AND_MELATONIN_BIOSYNTHESIS	0.0250345	0.200146	0.352488	-0.987546	-1.32896	1
REACTOME_RAB_GERANYLGERANYLATION	0.0249905	0.200146	0.352488	0.41568	1.40608	62
REACTOME_METABOLISM_OF_NUCLEOTIDES	0.0253282	0.201971	0.352488	-0.402355	-1.40296	87
WP_CONSTITUTIVE_ANDROSTANE_RECEPTOR_PATHWAY	0.0260846	0.20535	0.352488	-0.587414	-1.54523	19
PID_IFNG_PATHWAY	0.0259772	0.20535	0.352488	-0.510629	-1.52745	36
REACTOME_CLASS_A_1_RHODOPSIN_LIKE_RECEPTORS	0.025825	0.20535	0.352488	-0.365935	-1.35887	131
WP_INTRAFLAGELLAR_TRANSPORT_PROTEINS_BINDING_TO_DYNEIN	0.0260534	0.20535	0.352488	0.54535	1.51536	23
REACTOME_NONCANONICAL_ACTIVATION_OF_NOTCH3	0.0259298	0.20535	0.352488	0.76792	1.6494	8
KEGG_GLYCEROLIPID_METABOLISM	0.0263467	0.206886	0.352488	-0.49196	-1.50685	41
WP_EFFECT_OF_INTESTINAL_MICROBIOME_ON_ANTICOAGULANT_RESPONSE_OF_VITAMIN_K_ANTAGONISTS	0.0267262	0.207751	0.352488	-0.86253	-1.47957	4
REACTOME_VLDL_ASSEMBLY	0.0267262	0.207751	0.352488	-0.862221	-1.47904	4
REACTOME_M_PHASE	0.0266093	0.207751	0.352488	0.293911	1.26909	343
REACTOME_SHC1_EVENTS_IN_ERBB4_SIGNALING	0.0266612	0.207751	0.352488	0.668008	1.59294	12
REACTOME_MET_ACTIVATES_PI3K_AKT_SIGNALING	0.0270566	0.209079	0.352488	-0.792194	-1.54489	6
WP_PREIMPLANTATION_EMBRYO	0.0271163	0.209079	0.352488	-0.498391	-1.51775	40
REACTOME_LDL_REMODELING	0.0270249	0.209079	0.352488	-0.861735	-1.4782	4
REACTOME_SPHINGOLIPID_METABOLISM	0.0271681	0.209079	0.352488	-0.410834	-1.42589	81
REACTOME_HYALURONAN_UPTAKE_AND_DEGRADATION	0.0273208	0.20959	0.352488	-0.728147	-1.60202	10
REACTOME_ABERRANT_REGULATION_OF_MITOTIC_EXIT_IN_CANCER_DUE_TO_RB1_DEFECTS	0.0273909	0.20959	0.352488	-0.580423	-1.53459	20
REACTOME_DISEASES_ASSOCIATED_WITH_SURFACTANT_METABOLISM	0.0274382	0.20959	0.352488	0.941316	1.37946	2
WP_VITAMIN_K_METABOLISM_AND_ACTIVATION_OF_DEPENDENT_PROTEINS	0.0283237	0.213417	0.352488	-0.690853	-1.56908	11
REACTOME_PHOSPHATE_BOND_HYDROLYSIS_BY_NTPDASE_PROTEINS	0.0283541	0.213417	0.352488	-0.752412	-1.51052	7
REACTOME_SIGNALING_BY_MST1	0.0282193	0.213417	0.352488	-0.860335	-1.4758	4
KEGG_VIBRIO_CHOLERAE_INFECTION	0.0281902	0.213417	0.352488	-0.451357	-1.43859	50
PID_AVB3_INTEGRIN_PATHWAY	0.0282727	0.213417	0.352488	-0.419537	-1.42671	72
REACTOME_SYNTHESIS_OF_SUBSTRATES_IN_N_GLYCAN_BIOSYTHESIS	0.028054	0.213417	0.352488	-0.424358	-1.3994	60
BIOCARTA_FIBRINOLYSIS_PATHWAY	0.0284896	0.213915	0.352488	-0.726558	-1.59853	10
REACTOME_ACYL_CHAIN_REMODELING_OF_DAG_AND_TAG	0.0286576	0.214653	0.352488	-0.842899	-1.55348	5
REACTOME_ANTIGEN_PROCESSING_CROSS_PRESENTATION	0.0287506	0.214829	0.352488	-0.399838	-1.39418	87
WP_LIPID_METABOLISM_IN_SENESCENT_CELLS	0.0289515	0.215736	0.352488	-0.663284	-1.56905	13
REACTOME_SUMOYLATION_OF_DNA_METHYLATION_PROTEINS	0.0290119	0.215736	0.352488	0.6051	1.54128	16
KEGG_GLYOXYLATE_AND_DICARBOXYLATE_METABOLISM	0.0292021	0.216092	0.352488	-0.658505	-1.58616	14
REACTOME_NUCLEOTIDE_CATABOLISM	0.0293562	0.216092	0.352488	-0.529152	-1.54241	31
REACTOME_HIGHLY_CALCIUM_PERMEABLE_NICOTINIC_ACETYLCHOLINE_RECEPTORS	0.0292249	0.216092	0.352488	-0.922382	-1.46538	3
WP_TCELL_ACTIVATION_SARSCOV2	0.0294098	0.216092	0.352488	-0.435631	-1.42437	58
REACTOME_ACTIVATION_OF_THE_MRNA_UPON_BINDING_OF_THE_CAP_BINDING_COMPLEX_AND_EIFS_AND_SUBSEQUENT_BINDING_TO_43S	0.0294098	0.216092	0.352488	-0.434885	-1.42193	58
WP_G1_TO_S_CELL_CYCLE_CONTROL	0.0296882	0.217335	0.352488	-0.421136	-1.38877	60
REACTOME_CLASS_I_MHC_MEDIATED_ANTIGEN_PROCESSING_PRESENTATION	0.0297198	0.217335	0.352488	-0.30503	-1.25587	342
BIOCARTA_ERBB4_PATHWAY	0.0299528	0.218521	0.352488	0.751307	1.54935	7
REACTOME_SIGNALING_BY_INSULIN_RECEPTOR	0.0304937	0.221924	0.352488	-0.43047	-1.44152	64
REACTOME_PKMTS_METHYLATE_HISTONE_LYSINES	0.0305631	0.221924	0.352488	0.457336	1.4529	43
WP_ONCOSTATIN_M_SIGNALING_PATHWAY	0.0306665	0.222152	0.352488	-0.431329	-1.42472	61
KEGG_BETA_ALANINE_METABOLISM	0.0310196	0.223139	0.352488	-0.573174	-1.51542	20
BIOCARTA_CTL_PATHWAY	0.0309098	0.223139	0.352488	-0.858049	-1.47188	4
WP_EXRNA_MECHANISM_OF_ACTION_AND_BIOGENESIS	0.0310011	0.223139	0.352488	0.774831	1.51453	6
WP_PHOTODYNAMIC_THERAPYINDUCED_AP1_SURVIVAL_SIGNALING	0.031468	0.225838	0.321776	-0.466797	-1.4339	43
REACTOME_COMPLEMENT_CASCADE	0.0315785	0.226105	0.321776	-0.526917	-1.50144	28
REACTOME_GAMMA_CARBOXYLATION_TRANSPORT_AND_AMINO_TERMINAL_CLEAVAGE_OF_PROTEINS	0.031815	0.226267	0.321776	-0.744208	-1.5977	9
REACTOME_TFAP2_AP_2_FAMILY_REGULATES_TRANSCRIPTION_OF_GROWTH_FACTORS_AND_THEIR_RECEPTORS	0.0318211	0.226267	0.321776	-0.686409	-1.55899	11
WP_MIR124_PREDICTED_INTERACTIONS_WITH_CELL_CYCLE_AND_DIFFERENTIATION	0.031698	0.226267	0.321776	-0.78319	-1.52733	6
REACTOME_HEPARAN_SULFATE_HEPARIN_HS_GAG_METABOLISM	0.0321208	0.227873	0.321776	-0.461517	-1.458	48
REACTOME_HISTIDINE_CATABOLISM	0.0321962	0.227884	0.321776	-0.839106	-1.54649	5
WP_PHOSPHOINOSITIDES_METABOLISM	0.0331899	0.23438	0.321776	0.449559	1.42669	44
REACTOME_PROPIONYL_COA_CATABOLISM	0.0333105	0.234694	0.321776	-0.852396	-1.46218	4
KEGG_ANTIGEN_PROCESSING_AND_PRESENTATION	0.0336196	0.236333	0.321776	-0.467936	-1.47206	47
WP_NONCLASSICAL_ROLE_OF_VITAMIN_D	0.0340244	0.238635	0.321776	-0.780275	-1.52164	6
KEGG_OTHER_GLYCAN_DEGRADATION	0.0344063	0.240766	0.321776	-0.650999	-1.56808	14
REACTOME_GPCR_LIGAND_BINDING	0.0347723	0.242777	0.321776	-0.33373	-1.29768	199
WP_RENINANGIOTENSINALDOSTERONE_SYSTEM_RAAS	0.0349319	0.24334	0.321776	-0.494048	-1.44283	33
BIOCARTA_AMI_PATHWAY	0.035024	0.243433	0.321776	-0.60932	-1.57709	18
REACTOME_HDL_CLEARANCE	0.0357406	0.247497	0.321776	-0.83431	-1.53765	5
BIOCARTA_CTLA4_PATHWAY	0.0357692	0.247497	0.321776	-0.776515	-1.51431	6
WP_NONSMALL_CELL_LUNG_CANCER	0.0364557	0.251683	0.321776	-0.409181	-1.38394	70
WP_CHOLESTASIS	0.0367193	0.252501	0.321776	-0.648815	-1.56282	14
REACTOME_SARS_COV_2_MODULATES_AUTOPHAGY	0.0367378	0.252501	0.321776	0.682797	1.60157	11
REACTOME_PI3K_AKT_ACTIVATION	0.0368721	0.252712	0.321776	-0.744051	-1.55361	8
REACTOME_ACTIVATED_NTRK2_SIGNALS_THROUGH_PI3K	0.0369324	0.252712	0.321776	-0.772856	-1.50718	6
REACTOME_PROTEIN_METHYLATION	0.0370912	0.252729	0.321776	-0.604834	-1.54564	17
WP_OXIDATION_BY_CYTOCHROME_P450	0.0370985	0.252729	0.321776	-0.492715	-1.43479	32
REACTOME_NUCLEAR_SIGNALING_BY_ERBB4	0.0372512	0.25321	0.321776	0.554808	1.56346	26
REACTOME_BINDING_AND_UPTAKE_OF_LIGANDS_BY_SCAVENGER_RECEPTORS	0.0375866	0.253774	0.321776	-0.517404	-1.50817	31
WP_DEVELOPMENT_OF_PULMONARY_DENDRITIC_CELLS_AND_MACROPHAGE_SUBSETS	0.037514	0.253774	0.321776	-0.771616	-1.50476	6
REACTOME_EICOSANOIDS	0.0376597	0.253774	0.321776	-0.937785	-1.36848	2
REACTOME_HDMS_DEMETHYLATE_HISTONES	0.0376659	0.253774	0.321776	0.54642	1.49521	21
REACTOME_SURFACTANT_METABOLISM	0.0377453	0.253774	0.321776	0.596803	1.57102	18
WP_SEROTONIN_AND_ANXIETYRELATED_EVENTS	0.0380154	0.255017	0.321776	-0.742822	-1.55104	8
WP_STEROID_BIOSYNTHESIS	0.0380956	0.255017	0.321776	-0.771065	-1.50368	6
REACTOME_ZINC_INFLUX_INTO_CELLS_BY_THE_SLC39_GENE_FAMILY	0.0384676	0.256395	0.321776	-0.712363	-1.5673	10
KEGG_PHENYLALANINE_METABOLISM	0.038454	0.256395	0.321776	-0.64601	-1.55607	14
WP_TCA_CYCLE_NUTRIENT_USE_AND_INVASIVENESS_OF_OVARIAN_CANCER	0.0392851	0.261269	0.321776	-0.828614	-1.52715	5
REACTOME_RHOG_GTPASE_CYCLE	0.0393701	0.261269	0.321776	-0.404958	-1.37713	72
REACTOME_REGULATION_OF_TP53_ACTIVITY	0.0394528	0.261269	0.321776	0.324846	1.28609	151
WP_THYROID_STIMULATING_HORMONE_TSH_SIGNALING_PATHWAY	0.0397499	0.262672	0.321776	-0.417418	-1.38363	62
REACTOME_REMOVAL_OF_AMINOTERMINAL_PROPEPTIDES_FROM_GAMMA_CARBOXYLATED_PROTEINS	0.040302	0.265752	0.321776	-0.73591	-1.53661	8
WP_DRUG_INDUCTION_OF_BILE_ACID_PATHWAY	0.040422	0.265975	0.321776	-0.767851	-1.49742	6
REACTOME_SODIUM_COUPLED_SULPHATE_DI_AND_TRI_CARBOXYLATE_TRANSPORTERS	0.0405126	0.266004	0.321776	-0.847099	-1.4531	4
WP_EICOSANOID_SYNTHESIS	0.041055	0.268232	0.321776	-0.598247	-1.52881	17
REACTOME_ANDROGEN_BIOSYNTHESIS	0.0410036	0.268232	0.321776	-0.767075	-1.4959	6
REACTOME_PROSTANOID_LIGAND_RECEPTORS	0.0411127	0.268232	0.321776	0.854171	1.48242	4
WP_DISORDERS_IN_KETONE_BODY_SYNTHESIS	0.0422388	0.274419	0.321776	-0.825488	-1.52139	5
REACTOME_HYDROLYSIS_OF_LPC	0.0421668	0.274419	0.321776	-0.764726	-1.49132	6
REACTOME_HYALURONAN_METABOLISM	0.0425018	0.275547	0.321776	-0.637339	-1.53518	14
WP_TH17_CELL_DIFFERENTIATION_PATHWAY	0.0432245	0.279646	0.321776	-0.456034	-1.43137	46
WP_KININKALLIKREIN_PATHWAY	0.0435134	0.280926	0.321776	-0.842531	-1.44526	4
REACTOME_CELL_CYCLE_CHECKPOINTS	0.0436491	0.281156	0.321776	0.292837	1.21712	247
REACTOME_SYNAPTIC_ADHESION_LIKE_MOLECULES	0.0437314	0.281156	0.321776	0.582223	1.50032	17
REACTOME_HS_GAG_BIOSYNTHESIS	0.0438625	0.281413	0.321776	-0.534837	-1.51542	27
WP_SOMITOGENESIS_IN_THE_CONTEXT_OF_SPONDYLOCOSTAL_DYSOSTOSIS	0.044011	0.28178	0.321776	-0.823023	-1.51685	5
REACTOME_P75_NTR_RECEPTOR_MEDIATED_SIGNALLING	0.0447915	0.286184	0.321776	0.374411	1.37705	95
SA_MMP_CYTOKINE_CONNECTION	0.0453291	0.28783	0.321776	-0.723747	-1.55377	9
REACTOME_SUMOYLATION	0.0453148	0.28783	0.321776	0.322392	1.29156	163
PID_IL8_CXCR1_PATHWAY	0.0452622	0.28783	0.321776	0.540319	1.47851	21
WP_PROSTAGLANDIN_SYNTHESIS_AND_REGULATION	0.0456506	0.289276	0.321776	-0.48737	-1.45787	36
REACTOME_SIGNALING_BY_PDGF	0.0457875	0.28955	0.287857	-0.432084	-1.39061	55
REACTOME_GLUCURONIDATION	0.0466895	0.290361	0.321776	-0.703249	-1.54725	10
REACTOME_SIGNALING_BY_KIT_IN_DISEASE	0.0461255	0.290361	0.287857	-0.574708	-1.5118	19
WP_PYRIMIDINE_METABOLISM_AND_RELATED_DISEASES	0.0461255	0.290361	0.287857	-0.571201	-1.50258	19
REACTOME_NUCLEAR_RECEPTOR_TRANSCRIPTION_PATHWAY	0.0464462	0.290361	0.321776	-0.471006	-1.43435	40
WP_IL6_SIGNALING_PATHWAY	0.0464462	0.290361	0.321776	-0.470959	-1.43421	40
WP_ENDOCHONDRAL_OSSIFICATION	0.0467626	0.290361	0.282013	-0.438764	-1.41136	53
WP_ENDOCHONDRAL_OSSIFICATION_WITH_SKELETAL_DYSPLASIAS	0.0467626	0.290361	0.282013	-0.438764	-1.41136	53
WP_TROP2_REGULATORY_SIGNALING	0.0465116	0.290361	0.282013	-0.445323	-1.40092	47
REACTOME_CYCLIN_D_ASSOCIATED_EVENTS_IN_G1	0.0465116	0.290361	0.282013	-0.447593	-1.39841	45
REACTOME_INTERFERON_SIGNALING	0.0472175	0.292011	0.271289	-0.346531	-1.31545	158
REACTOME_G_ALPHA_Q_SIGNALLING_EVENTS	0.047138	0.292011	0.271289	-0.347878	-1.30199	136
BIOCARTA_TEL_PATHWAY	0.047619	0.293379	0.287857	-0.598631	-1.50019	16
REACTOME_INTEGRIN_SIGNALING	0.0477064	0.293379	0.282013	-0.527454	-1.4945	27
BIOCARTA_PRC2_PATHWAY	0.047724	0.293379	0.321776	0.605856	1.50344	14
WP_SARSCOV2_AND_ACE2_RECEPTOR_MOLECULAR_MECHANISMS	0.0481462	0.295126	0.321776	-0.818582	-1.50866	5
REACTOME_SYNTHESIS_OF_15_EICOSATETRAENOIC_ACID_DERIVATIVES	0.0483559	0.295126	0.287857	-0.757204	-1.47665	6
REACTOME_ATORVASTATIN_ADME	0.0483908	0.295126	0.321776	-0.899425	-1.42891	3
WP_PKCGAMMA_CALCIUM_SIGNALING_PATHWAY_IN_ATAXIA	0.0482002	0.295126	0.321776	0.576807	1.48637	17
BIOCARTA_LDL_PATHWAY	0.0485644	0.295601	0.321776	-0.760291	-1.48267	6
REACTOME_SYNDECAN_INTERACTIONS	0.0487365	0.296064	0.276501	-0.526202	-1.48285	26
REACTOME_KETONE_BODY_METABOLISM	0.049626	0.297627	0.321776	-0.699005	-1.53791	10
REACTOME_CHYLOMICRON_CLEARANCE	0.0493277	0.297627	0.321776	-0.816682	-1.50516	5
BIOCARTA_ERBB3_PATHWAY	0.0491159	0.297627	0.287857	-0.788799	-1.45377	5
WP_ARYL_HYDROCARBON_RECEPTOR_PATHWAY_WP2586	0.049307	0.297627	0.321776	-0.474375	-1.43282	38
REACTOME_AMYLOID_FIBER_FORMATION	0.0495575	0.297627	0.271289	-0.455567	-1.39539	41
REACTOME_SIGNALING_BY_NUCLEAR_RECEPTORS	0.0496689	0.297627	0.261664	-0.320658	-1.25097	202
REACTOME_CELL_DEATH_SIGNALLING_VIA_NRAGE_NRIF_AND_NADE	0.0494242	0.297627	0.321776	0.386122	1.34742	75
REACTOME_A_TETRASACCHARIDE_LINKER_SEQUENCE_IS_REQUIRED_FOR_GAG_SYNTHESIS	0.0499076	0.298478	0.276501	-0.543479	-1.49645	24
REACTOME_MITOCHONDRIAL_FATTY_ACID_BETA_OXIDATION	0.0501859	0.299562	0.276501	-0.480224	-1.40246	33
REACTOME_PI_3K_CASCADE_FGFR4	0.0504854	0.300768	0.282013	-0.674344	-1.53159	11
BIOCARTA_MHC_PATHWAY	0.0513308	0.301155	0.276501	-0.713545	-1.48991	8
WP_BIOGENIC_AMINE_SYNTHESIS	0.0514286	0.301155	0.276501	-0.741536	-1.48869	7
REACTOME_SCAVENGING_OF_HEME_FROM_PLASMA	0.0513308	0.301155	0.276501	-0.712535	-1.4878	8
PID_EPHA_FWDPATHWAY	0.0513761	0.301155	0.271289	-0.524458	-1.48602	27
REACTOME_INSULIN_RECEPTOR_SIGNALLING_CASCADE	0.0509236	0.301155	0.321776	-0.471352	-1.42369	38
WP_P53_TRANSCRIPTIONAL_GENE_NETWORK	0.0510563	0.301155	0.266351	-0.392399	-1.35514	79
REACTOME_PTEN_REGULATION	0.051205	0.301155	0.321776	0.329692	1.27447	134
WP_EV_RELEASE_FROM_CARDIAC_CELLS_AND_THEIR_FUNCTIONAL_EFFECTS	0.0507099	0.301155	0.287857	0.792794	1.47501	5
WP_RALA_DOWNSTREAM_REGULATED_GENES	0.0509165	0.301155	0.287857	0.629491	1.50109	12
REACTOME_ACTIVATION_OF_CASPASES_THROUGH_APOPTOSOME_MEDIATED_CLEAVAGE	0.0515464	0.301273	0.287857	0.763734	1.49284	6
KEGG_TERPENOID_BACKBONE_BIOSYNTHESIS	0.0519231	0.302901	0.276501	-0.632244	-1.52291	14
REACTOME_IRON_UPTAKE_AND_TRANSPORT	0.0521583	0.303127	0.266351	-0.427348	-1.37464	53
REACTOME_DOWNREGULATION_OF_ERBB2_ERBB3_SIGNALING	0.0521484	0.303127	0.321776	0.632903	1.54299	13
REACTOME_SODIUM_PROTON_EXCHANGERS	0.052521	0.304661	0.287857	0.680514	1.46167	8
WP_IL10_ANTIINFLAMMATORY_SIGNALING_PATHWAY	0.0527344	0.304837	0.276501	-0.685751	-1.50875	10
REACTOME_DISINHIBITION_OF_SNARE_FORMATION	0.0530452	0.304837	0.276501	-0.7812	-1.43977	5
REACTOME_SYNTHESIS_OF_GDP_MANNOSE	0.0530452	0.304837	0.276501	-0.779806	-1.4372	5
KEGG_ALDOSTERONE_REGULATED_SODIUM_REABSORPTION	0.0529197	0.304837	0.266351	-0.491608	-1.43298	31
NABA_CORE_MATRISOME	0.0528926	0.304837	0.252961	-0.319283	-1.24107	198
BIOCARTA_FXR_PATHWAY	0.0538922	0.307984	0.276501	-0.833409	-1.42961	4
REACTOME_SIGNALING_BY_TYPE_1_INSULIN_LIKE_GROWTH_FACTOR_1_RECEPTOR_IGF1R	0.0537634	0.307984	0.261664	-0.461973	-1.39536	38
REACTOME_HATS_ACETYLATE_HISTONES	0.0538191	0.307984	0.321776	0.378863	1.34724	80
REACTOME_GLYCOSPHINGOLIPID_METABOLISM	0.0544815	0.310776	0.257206	-0.456945	-1.39198	39
KEGG_GLYCOSAMINOGLYCAN_DEGRADATION	0.0549242	0.31123	0.266351	-0.578667	-1.49775	18
WP_GLYCOSAMINOGLYCAN_DEGRADATION	0.0548204	0.31123	0.266351	-0.599796	-1.4791	15
REACTOME_FOXO_MEDIATED_TRANSCRIPTION_OF_CELL_DEATH_GENES	0.0548204	0.31123	0.266351	-0.599207	-1.47765	15
REACTOME_EARLY_SARS_COV_2_INFECTION_EVENTS	0.0549645	0.31123	0.257206	-0.456158	-1.37798	37
REACTOME_GASTRIN_CREB_SIGNALLING_PATHWAY_VIA_PKC_AND_MAPK	0.0552381	0.312207	0.266351	-0.589043	-1.47616	16
PID_FGF_PATHWAY	0.0554562	0.312285	0.257206	-0.44119	-1.37841	45
REACTOME_NOTCH2_ACTIVATION_AND_TRANSMISSION_OF_SIGNAL_TO_THE_NUCLEUS	0.0554371	0.312285	0.282013	0.526314	1.44637	22
REACTOME_ACETYLCHOLINE_REGULATES_INSULIN_SECRETION	0.0555556	0.312285	0.282013	0.669218	1.46885	9
REACTOME_ELECTRIC_TRANSMISSION_ACROSS_GAP_JUNCTIONS	0.0558882	0.313584	0.271289	0.831869	1.44371	4
REACTOME_CAMK_IV_MEDIATED_PHOSPHORYLATION_OF_CREB	0.0571539	0.314398	0.321776	-0.707075	-1.51798	9
REACTOME_SYNTHESIS_OF_KETONE_BODIES	0.0570342	0.314398	0.261664	-0.710563	-1.48368	8
WP_NAD_BIOSYNTHESIS_II_FROM_TRYPTOPHAN	0.0571429	0.314398	0.261664	-0.735924	-1.47742	7
WP_TRANSCRIPTIONAL_ACTIVATION_BY_NRF2_IN_RESPONSE_TO_PHYTOCHEMICALS	0.0567108	0.314398	0.261664	-0.597545	-1.47355	15
WP_KYNURENINE_PATHWAY_AND_LINKS_TO_CELL_SENESCENCE	0.0571429	0.314398	0.261664	-0.585217	-1.46657	16
REACTOME_DEGRADATION_OF_CYSTEINE_AND_HOMOCYSTEINE	0.0567108	0.314398	0.261664	-0.592249	-1.46049	15
REACTOME_MRNA_EDITING_C_TO_U_CONVERSION	0.0569123	0.314398	0.321776	-0.893421	-1.41937	3
REACTOME_FGFR1B_LIGAND_BINDING_AND_ACTIVATION	0.0566802	0.314398	0.271289	-0.875817	-1.3914	3
KEGG_MELANOMA	0.0567766	0.314398	0.257206	-0.420787	-1.35425	55
REACTOME_PI3K_AKT_SIGNALING_IN_CANCER	0.056338	0.314398	0.252961	-0.386263	-1.33395	79
REACTOME_GRB7_EVENTS_IN_ERBB2_SIGNALING	0.0567951	0.314398	0.271289	0.787834	1.46578	5
WP_CALCIUM_REGULATION_IN_CARDIAC_CELLS	0.0576025	0.316301	0.321776	0.340373	1.3064	125
REACTOME_G_ALPHA_12_13_SIGNALLING_EVENTS	0.0577367	0.316475	0.287857	0.377246	1.31402	74
WP_ACE_INHIBITOR_PATHWAY	0.0578479	0.316523	0.321776	-0.689741	-1.51753	10
REACTOME_PASSIVE_TRANSPORT_BY_AQUAPORINS	0.0580271	0.316941	0.261664	-0.74606	-1.45492	6
REACTOME_ORGANIC_ANION_TRANSPORT	0.0582524	0.31761	0.261664	-0.922259	-1.34582	2
KEGG_ASCORBATE_AND_ALDARATE_METABOLISM	0.0585938	0.318539	0.261664	-0.682904	-1.50248	10
WP_CANCER_IMMUNOTHERAPY_BY_PD1_BLOCKADE	0.0589391	0.318539	0.261664	-0.629531	-1.4892	13
REACTOME_MET_ACTIVATES_PTPN11	0.0589391	0.318539	0.261664	-0.769813	-1.41878	5
KEGG_SPHINGOLIPID_METABOLISM	0.0587877	0.318539	0.321776	-0.473856	-1.41745	36
REACTOME_EPIGENETIC_REGULATION_OF_GENE_EXPRESSION	0.0586854	0.318539	0.287857	0.364053	1.30223	85
REACTOME_PI5P_REGULATES_TP53_ACETYLATION	0.0590645	0.318659	0.321776	0.71088	1.52689	8
PID_IL8_CXCR2_PATHWAY	0.0594001	0.319911	0.321776	0.530351	1.49454	26
REACTOME_CONSTITUTIVE_SIGNALING_BY_AKT1_E17K_IN_CANCER	0.0595668	0.320249	0.248911	-0.516869	-1.45655	26
REACTOME_P75NTR_NEGATIVELY_REGULATES_CELL_CYCLE_VIA_SC1	0.0597938	0.320911	0.266351	0.751728	1.46937	6
PID_LYMPH_ANGIOGENESIS_PATHWAY	0.0599251	0.321057	0.252961	-0.540511	-1.47137	23
WP_MEVALONATE_ARM_OF_CHOLESTEROL_BIOSYNTHESIS_PATHWAY	0.0606654	0.321121	0.257206	-0.652613	-1.51629	12
KEGG_NITROGEN_METABOLISM	0.0602637	0.321121	0.252961	-0.583942	-1.49225	17
BIOCARTA_INTRINSIC_PATHWAY	0.0606061	0.321121	0.252961	-0.575311	-1.48906	18
BIOCARTA_MET_PATHWAY	0.060219	0.321121	0.248911	-0.485027	-1.41379	31
REACTOME_PEPTIDE_HORMONE_METABOLISM	0.0605505	0.321121	0.248911	-0.420653	-1.35841	56
PID_P53_DOWNSTREAM_PATHWAY	0.0606061	0.321121	0.237794	-0.347375	-1.28387	124
WP_BREAST_CANCER_PATHWAY	0.0601002	0.321121	0.237794	-0.343652	-1.27667	127
WP_PHYSIOLOGICAL_AND_PATHOLOGICAL_HYPERTROPHY_OF_THE_HEART	0.0609982	0.322035	0.248911	-0.533358	-1.46858	24
KEGG_P53_SIGNALING_PATHWAY	0.0611511	0.322035	0.245042	-0.401929	-1.33228	62
KEGG_LYSOSOME	0.061082	0.322035	0.24134	-0.365236	-1.32551	111
KEGG_PENTOSE_PHOSPHATE_PATHWAY	0.0619137	0.324113	0.248911	-0.542596	-1.46339	22
WP_PROSTAGLANDIN_AND_LEUKOTRIENE_METABOLISM_IN_SENESCENCE	0.0617978	0.324113	0.248911	-0.525021	-1.4292	23
WP_CODEINE_AND_MORPHINE_METABOLISM	0.0618762	0.324113	0.257206	-0.821071	-1.40845	4
REACTOME_DSCAM_INTERACTIONS	0.0619658	0.324113	0.266351	0.659082	1.44661	9
WP_FBXL10_ENHANCEMENT_OF_MAPERK_SIGNALING_IN_DIFFUSE_LARGE_BCELL_LYMPHOMA	0.0621359	0.324453	0.252961	-0.66392	-1.50791	11
REACTOME_NICOTINATE_METABOLISM	0.0623853	0.325205	0.245042	-0.505817	-1.4332	27
BIOCARTA_EDG1_PATHWAY	0.0626186	0.32587	0.248911	-0.535055	-1.41617	21
KEGG_CELL_ADHESION_MOLECULES_CAMS	0.0630473	0.327549	0.237794	-0.382346	-1.3522	94
WP_MICRORNAS_IN_CARDIOMYOCYTE_HYPERTROPHY	0.0633803	0.328725	0.237794	-0.38171	-1.31823	79
REACTOME_FATTY_ACIDS_BOUND_TO_GPR40_FFAR1_REGULATE_INSULIN_SECRETION	0.0639175	0.330956	0.257206	0.75081	1.46758	6
REACTOME_WNT5A_DEPENDENT_INTERNALIZATION_OF_FZD4	0.0642722	0.331679	0.245042	-0.587575	-1.44896	15
REACTOME_FOXO_MEDIATED_TRANSCRIPTION_OF_CELL_CYCLE_GENES	0.0642722	0.331679	0.245042	-0.587172	-1.44797	15
REACTOME_RIBAVIRIN_ADME	0.0644531	0.332057	0.248911	-0.677247	-1.49004	10
REACTOME_CLATHRIN_MEDIATED_ENDOCYTOSIS	0.0646259	0.332392	0.231127	-0.340899	-1.26971	134
BIOCARTA_DICER_PATHWAY	0.0649087	0.333292	0.252961	0.78107	1.4532	5
BIOCARTA_HSWI_SNF_PATHWAY	0.0651731	0.334093	0.252961	0.611312	1.45774	12
BIOCARTA_DC_PATHWAY	0.0654519	0.334966	0.287805	-0.887917	-1.41063	3
REACTOME_CLEC7A_DECTIN_1_INDUCES_NFAT_ACTIVATION	0.0660194	0.336463	0.245042	-0.662606	-1.50493	11
REACTOME_TRANSCRIPTIONAL_REGULATION_OF_GRANULOPOIESIS	0.066055	0.336463	0.237794	-0.50287	-1.42485	27
WP_METABOLIC_REPROGRAMMING_IN_COLON_CANCER	0.0660714	0.336463	0.234393	-0.447632	-1.36317	40
WP_MIRNA_TARGETS_IN_ECM_AND_MEMBRANE_RECEPTORS	0.0664207	0.337684	0.237794	-0.54772	-1.44081	19
BIOCARTA_SODD_PATHWAY	0.0665399	0.337734	0.24134	-0.692394	-1.44574	8
REACTOME_PTK6_PROMOTES_HIF1A_STABILIZATION	0.067085	0.3378	0.287805	-0.799983	-1.47439	5
PID_HNF3A_PATHWAY	0.0667904	0.3378	0.237794	-0.475028	-1.38328	32
WP_INTERFERON_TYPE_I_SIGNALING_PATHWAYS	0.0671506	0.3378	0.234393	-0.422179	-1.34824	52
WP_SOMATIC_SEX_DETERMINATION	0.0669371	0.3378	0.248911	0.77474	1.44142	5
REACTOME_UNWINDING_OF_DNA	0.0672098	0.3378	0.248911	0.607131	1.44777	12
REACTOME_SIGNALING_BY_BMP	0.0667831	0.3378	0.287805	0.521835	1.47054	26
WP_COPPER_HOMEOSTASIS	0.0678571	0.340111	0.231127	-0.446081	-1.35845	40
PID_RB_1PATHWAY	0.0678899	0.340111	0.234393	-0.411147	-1.32771	56
REACTOME_THE_RETINOID_CYCLE_IN_CONES_DAYLIGHT_VISION	0.0681363	0.340792	0.245042	-0.965425	-1.2992	1
REACTOME_GABA_SYNTHESIS_RELEASE_REUPTAKE_AND_DEGRADATION	0.0684932	0.342022	0.24134	-0.641169	-1.4897	12
REACTOME_NEGATIVE_REGULATORS_OF_DDX58_IFIH1_SIGNALING	0.0689655	0.343825	0.252961	0.46795	1.40859	33
WP_NRP1TRIGGERED_SIGNALING_PATHWAYS_IN_PANCREATIC_CANCER	0.069395	0.344852	0.227987	-0.418288	-1.33784	51
WP_CARDIAC_HYPERTROPHIC_RESPONSE	0.069395	0.344852	0.227987	-0.417649	-1.33579	51
KEGG_ONE_CARBON_POOL_BY_FOLATE	0.0696798	0.345711	0.234393	-0.569654	-1.45574	17
WP_ANGIOPOIETINLIKE_PROTEIN_8_REGULATORY_PATHWAY	0.0699301	0.346395	0.224966	-0.348027	-1.27067	119
BIOCARTA_AKT_PATHWAY	0.0701107	0.346733	0.231127	-0.544049	-1.43116	19
BIOCARTA_G1_PATHWAY	0.0703971	0.347593	0.227987	-0.506433	-1.42714	26
REACTOME_PRESYNAPTIC_DEPOLARIZATION_AND_CALCIUM_CHANNEL_OPENING	0.0705128	0.347608	0.248911	0.645324	1.41641	9
WP_NUCLEAR_RECEPTORS	0.070632	0.34764	0.231127	-0.492496	-1.40336	28
WP_LUNG_FIBROSIS	0.0709091	0.348448	0.227987	-0.4522	-1.35267	36
BIOCARTA_PTEN_PATHWAY	0.0715631	0.351103	0.231127	-0.56801	-1.45154	17
WP_MAMMALIAN_DISORDER_OF_SEXUAL_DEVELOPMENT	0.0718816	0.352106	0.245042	0.576604	1.44661	15
WP_DEGRADATION_PATHWAY_OF_SPHINGOLIPIDS_INCLUDING_DISEASES	0.073724	0.355189	0.227987	-0.582338	-1.43605	15
BIOCARTA_ARF_PATHWAY	0.073724	0.355189	0.227987	-0.579011	-1.42784	15
KEGG_STARCH_AND_SUCROSE_METABOLISM	0.0740072	0.355189	0.222056	-0.504548	-1.42183	26
WP_SPHINGOLIPID_METABOLISM_OVERVIEW	0.0731707	0.355189	0.227987	-0.526044	-1.41875	22
REACTOME_VEGFR2_MEDIATED_CELL_PROLIFERATION	0.0738007	0.355189	0.224966	-0.539279	-1.41861	19
WP_STEROID_HORMONE_PRECURSOR_BIOSYNTHESIS	0.0726916	0.355189	0.234393	-0.762985	-1.4062	5
REACTOME_HS_GAG_DEGRADATION	0.0740038	0.355189	0.227987	-0.525239	-1.39019	21
BIOCARTA_MTOR_PATHWAY	0.0740038	0.355189	0.227987	-0.523259	-1.38495	21
PID_ANGIOPOIETIN_RECEPTOR_PATHWAY	0.0732143	0.355189	0.222056	-0.427782	-1.34269	46
REACTOME_CELL_CELL_JUNCTION_ORGANIZATION	0.0732601	0.355189	0.224966	-0.409171	-1.31687	55
WP_FRAGILE_X_SYNDROME	0.0736842	0.355189	0.21925	-0.365617	-1.31276	107
REACTOME_CARGO_RECOGNITION_FOR_CLATHRIN_MEDIATED_ENDOCYTOSIS	0.0735552	0.355189	0.21925	-0.368271	-1.30242	94
WP_JOUBERT_SYNDROME	0.073903	0.355189	0.252961	0.370361	1.28461	72
PID_PI3K_PLC_TRK_PATHWAY	0.0742115	0.355616	0.224966	-0.466571	-1.35866	32
PID_BMP_PATHWAY	0.0746606	0.357214	0.248911	0.424456	1.32608	40
WP_HEPATITIS_C_AND_HEPATOCELLULAR_CARCINOMA	0.0751342	0.358923	0.21925	-0.432672	-1.35179	45
WP_FOCAL_ADHESION_PI3KAKTMTORSIGNALING_PATHWAY	0.0755034	0.359074	0.2114	-0.303048	-1.20763	252
REACTOME_CELL_CYCLE_MITOTIC	0.0754717	0.359074	0.271289	0.257553	1.13683	483
REACTOME_DUAL_INCISION_IN_GG_NER	0.0755149	0.359074	0.248911	0.425002	1.33509	41
NABA_PROTEOGLYCANS	0.0757576	0.359121	0.224966	-0.557462	-1.44286	18
REACTOME_LDL_CLEARANCE	0.0756458	0.359121	0.222056	-0.538277	-1.41597	19
BIOCARTA_TOB1_PATHWAY	0.0761719	0.3596	0.227987	-0.662789	-1.45823	10
REACTOME_EPHA_MEDIATED_GROWTH_CONE_COLLAPSE	0.0762082	0.3596	0.222056	-0.488949	-1.39325	28
REACTOME_MRNA_DECAY_BY_5_TO_3_EXORIBONUCLEASE	0.0761099	0.3596	0.237794	0.570867	1.43221	15
REACTOME_MATURATION_OF_SARS_COV_2_SPIKE_PROTEIN	0.0763636	0.359783	0.21925	-0.444976	-1.33106	36
REACTOME_CALCITONIN_LIKE_LIGAND_RECEPTORS	0.0765835	0.359896	0.287805	-0.789951	-1.4559	5
WP_MIR517_RELATIONSHIP_WITH_ARCN1_AND_USP1	0.0766208	0.359896	0.227987	-0.758192	-1.39736	5
REACTOME_TIGHT_JUNCTION_INTERACTIONS	0.076779	0.360091	0.222056	-0.513202	-1.39703	23
BIOCARTA_HCMV_PATHWAY	0.0780952	0.362407	0.222056	-0.571224	-1.4315	16
REACTOME_VLDLR_INTERNALISATION_AND_DEGRADATION	0.0780952	0.362407	0.222056	-0.570571	-1.42987	16
REACTOME_DOWNSTREAM_SIGNALING_OF_ACTIVATED_FGFR4	0.0776515	0.362407	0.222056	-0.552137	-1.42908	18
REACTOME_SIGNALING_BY_PDGFR_IN_DISEASE	0.0774908	0.362407	0.21925	-0.534825	-1.40689	19
REACTOME_DETOXIFICATION_OF_REACTIVE_OXYGEN_SPECIES	0.0782123	0.362407	0.21925	-0.47831	-1.37457	29
REACTOME_IRS_MEDIATED_SIGNALLING	0.0780669	0.362407	0.21925	-0.456876	-1.33427	33
REACTOME_DISEASES_ASSOCIATED_WITH_GLYCOSAMINOGLYCAN_METABOLISM	0.0781818	0.362407	0.216543	-0.443096	-1.32544	36
REACTOME_VESICLE_MEDIATED_TRANSPORT	0.0776398	0.362407	0.199915	-0.263842	-1.14102	613
REACTOME_CALCINEURIN_ACTIVATES_NFAT	0.0786517	0.363352	0.21925	-0.670171	-1.43875	9
REACTOME_ARACHIDONATE_PRODUCTION_FROM_DAG	0.0785855	0.363352	0.224966	-0.756363	-1.39399	5
REACTOME_SUMOYLATION_OF_UBIQUITINYLATION_PROTEINS	0.0788288	0.363626	0.24134	0.43233	1.33269	38
BIOCARTA_VDR_PATHWAY	0.0790598	0.364147	0.234393	0.504449	1.40171	23
PID_PDGFRB_PATHWAY	0.0794473	0.365387	0.208955	-0.341561	-1.25323	122
WP_OVERLAP_BETWEEN_SIGNAL_TRANSDUCTION_PATHWAYS_CONTRIBUTING_TO_LMNA_LAMINOPATHIES	0.079929	0.366509	0.2114	-0.421395	-1.34	49
WP_HEPATOCYTE_GROWTH_FACTOR_RECEPTOR_SIGNALING	0.0799257	0.366509	0.216543	-0.456142	-1.33213	33
WP_ANTIVIRAL_AND_ANTIINFLAMMATORY_EFFECTS_OF_NRF2_ON_SARSCOV2_PATHWAY	0.0805243	0.367601	0.216543	-0.509543	-1.38707	23
WP_INFLUENCE_OF_LAMINOPATHIES_ON_WNT_SIGNALING	0.080292	0.367601	0.213928	-0.46955	-1.36868	31
WP_TRANSLATION_INHIBITORS_IN_CHRONICALLY_ACTIVATED_PDGFRA_CELLS	0.0805009	0.367601	0.2114	-0.425584	-1.32965	45
REACTOME_DEFECTIVE_EXT2_CAUSES_EXOSTOSES_2	0.0807692	0.368174	0.21925	-0.602059	-1.4502	14
WP_MIRNA_REGULATION_OF_DNA_DAMAGE_RESPONSE	0.0810811	0.36905	0.2114	-0.385847	-1.28809	67
PID_IL4_2PATHWAY	0.0814159	0.370029	0.208955	-0.435768	-1.33474	41
WP_ARYLAMINE_METABOLISM	0.0815534	0.370109	0.21925	-0.907473	-1.32425	2
WP_SARSCOV2_MITOCHONDRIAL_CHRONIC_OXIDATIVE_STRESS_AND_ENDOTHELIAL_DYSFUNCTION	0.0817844	0.370215	0.213928	-0.523318	-1.38361	20
REACTOME_BETA_OXIDATION_OF_BUTANOYL_COA_TO_ACETYL_COA	0.0818363	0.370215	0.222056	-0.801813	-1.37541	4
REACTOME_DOWNSTREAM_SIGNAL_TRANSDUCTION	0.0819367	0.370215	0.213928	-0.477664	-1.37271	29
WP_NEUROINFLAMMATION_AND_GLUTAMATERGIC_SIGNALING	0.0824742	0.372099	0.204295	-0.348249	-1.27164	113
BIOCARTA_RHO_PATHWAY	0.0840517	0.378662	0.227987	0.522386	1.3947	20
REACTOME_PTK6_EXPRESSION	0.0844794	0.380034	0.216543	-0.75005	-1.38236	5
REACTOME_PTK6_REGULATES_RHO_GTPASES_RAS_GTPASE_AND_MAP_KINASES	0.0846154	0.380092	0.213928	-0.599365	-1.44371	14
REACTOME_INTRINSIC_PATHWAY_OF_FIBRIN_CLOT_FORMATION	0.0847458	0.380124	0.2114	-0.555529	-1.41964	17
REACTOME_CONSTITUTIVE_SIGNALING_BY_EGFRVIII	0.0850662	0.381008	0.2114	-0.57154	-1.40942	15
BIOCARTA_NTHI_PATHWAY	0.0855019	0.381851	0.208955	-0.518673	-1.37133	20
REACTOME_SIGNALING_BY_EGFR_IN_CANCER	0.085389	0.381851	0.2114	-0.508318	-1.34541	21
REACTOME_G2_M_DNA_DAMAGE_CHECKPOINT	0.0857143	0.382246	0.227987	0.382359	1.2852	58
PID_TRAIL_PATHWAY	0.0862385	0.383887	0.206588	-0.487403	-1.38102	27
REACTOME_ECM_PROTEOGLYCANS	0.0863309	0.383887	0.204295	-0.393044	-1.30283	62
REACTOME_HSF1_ACTIVATION	0.0866426	0.384534	0.204295	-0.487146	-1.37279	26
PID_ERBB1_DOWNSTREAM_PATHWAY	0.0867257	0.384534	0.202072	-0.359644	-1.28206	102
REACTOME_G_BETA_GAMMA_SIGNALLING_THROUGH_PI3KGAMMA	0.0869565	0.385004	0.224966	0.533396	1.40676	19
REACTOME_DEFECTIVE_B4GALT7_CAUSES_EDS_PROGEROID_TYPE	0.0871212	0.385181	0.208955	-0.544652	-1.40971	18
WP_CONGENITAL_GENERALIZED_LIPODYSTROPHY	0.087619	0.385934	0.208955	-0.564687	-1.41512	16
REACTOME_EXTRA_NUCLEAR_ESTROGEN_SIGNALING	0.0881295	0.385934	0.202072	-0.3922	-1.30004	62
WP_HEPATITIS_B_INFECTION	0.0881356	0.385934	0.195789	-0.330603	-1.22981	129
REACTOME_SIGNALING_BY_NOTCH1	0.0881671	0.385934	0.231127	0.36046	1.24845	71
REACTOME_SEMA3A_PAK_DEPENDENT_AXON_REPULSION	0.0880503	0.385934	0.21925	0.561105	1.42922	16
REACTOME_POST_TRANSCRIPTIONAL_SILENCING_BY_SMALL_RNAS	0.0880503	0.385934	0.21925	0.696033	1.43537	7
REACTOME_NETRIN_MEDIATED_REPULSION_SIGNALS	0.0880503	0.385934	0.21925	0.697322	1.43803	7
REACTOME_REGULATED_PROTEOLYSIS_OF_P75NTR	0.0882957	0.38595	0.216543	0.601745	1.41145	11
REACTOME_CONSTITUTIVE_SIGNALING_BY_LIGAND_RESPONSIVE_EGFR_CANCER_VARIANTS	0.0885609	0.386561	0.204295	-0.524103	-1.37869	19
WP_IL9_SIGNALING_PATHWAY	0.0888469	0.386716	0.206588	-0.564534	-1.39214	15
WP_TRANSLATION_FACTORS	0.0888099	0.386716	0.199915	-0.408044	-1.29754	49
WP_TYPE_I_COLLAGEN_SYNTHESIS_IN_THE_CONTEXT_OF_OSTEOGENESIS_IMPERFECTA	0.0892193	0.38779	0.204295	-0.479538	-1.36643	28
REACTOME_SIGNALING_BY_PDGFRA_TRANSMEMBRANE_JUXTAMEMBRANE_AND_KINASE_DOMAIN_MUTANTS	0.0900196	0.389626	0.208955	-0.61361	-1.42567	12
WP_NRF2ARE_REGULATION	0.0898876	0.389626	0.204295	-0.498337	-1.35656	23
REACTOME_SMAC_XIAP_REGULATED_APOPTOTIC_RESPONSE	0.0901468	0.389626	0.216543	0.69084	1.42466	7
KEGG_VALINE_LEUCINE_AND_ISOLEUCINE_BIOSYNTHESIS	0.0901468	0.389626	0.216543	0.692714	1.42852	7
REACTOME_METABOLISM_OF_STEROID_HORMONES	0.090573	0.390912	0.202072	-0.494615	-1.3619	24
REACTOME_RESOLUTION_OF_SISTER_CHROMATID_COHESION	0.0906977	0.390912	0.227987	0.319582	1.21835	119
REACTOME_SIGNALING_BY_MODERATE_KINASE_ACTIVITY_BRAF_MUTANTS	0.0912343	0.392677	0.197822	-0.427239	-1.31239	43
REACTOME_SENESCENCE_ASSOCIATED_SECRETORY_PHENOTYPE_SASP	0.0915619	0.393538	0.197822	-0.409747	-1.29445	48
WP_THYROXINE_THYROID_HORMONE_PRODUCTION	0.0917603	0.393842	0.202072	-0.497671	-1.35475	23
REACTOME_SODIUM_COUPLED_PHOSPHATE_COTRANSPORTERS	0.0931174	0.399112	0.208955	-0.846455	-1.34476	3
BIOCARTA_PCAF_PATHWAY	0.0939335	0.400114	0.204295	-0.610577	-1.41863	12
BIOCARTA_TERC_PATHWAY	0.0947776	0.400114	0.202072	-0.725	-1.41385	6
WP_TRANSCRIPTIONAL_CASCADE_REGULATING_ADIPOGENESIS	0.0943026	0.400114	0.204295	-0.596104	-1.41013	13
WP_GLUTATHIONE_METABOLISM	0.094697	0.400114	0.199915	-0.537424	-1.391	18
WP_LEUCINE_ISOLEUCINE_AND_VALINE_METABOLISM	0.093633	0.400114	0.199915	-0.494669	-1.34658	23
PID_AP1_PATHWAY	0.0935252	0.400114	0.195789	-0.405963	-1.30585	53
PID_MET_PATHWAY	0.0945709	0.400114	0.191892	-0.370317	-1.27779	78
WP_ANDROGEN_RECEPTOR_SIGNALING_PATHWAY	0.09375	0.400114	0.191892	-0.366056	-1.27597	85
REACTOME_G_ALPHA_I_SIGNALLING_EVENTS	0.0947547	0.400114	0.188204	-0.318859	-1.21647	169
REACTOME_MITOTIC_METAPHASE_AND_ANAPHASE	0.0940961	0.400114	0.287805	0.295417	1.21616	225
REACTOME_PI3K_EVENTS_IN_ERBB4_SIGNALING	0.0945378	0.400114	0.2114	0.652572	1.40165	8
PID_IL12_STAT4_PATHWAY	0.0952381	0.401509	0.199915	-0.558272	-1.39904	16
REACTOME_MICRORNA_MIRNA_BIOGENESIS	0.0954447	0.401831	0.213928	0.483251	1.34864	24
KEGG_PANTOTHENATE_AND_COA_BIOSYNTHESIS	0.0962672	0.404742	0.202072	-0.593197	-1.40325	13
WP_THYROID_HORMONES_PRODUCTION_AND_PERIPHERAL_DOWNSTREAM_SIGNALING_EFFECTS	0.0966608	0.405844	0.190023	-0.366245	-1.26927	80
REACTOME_TNFR1_INDUCED_NFKAPPAB_SIGNALING_PATHWAY	0.0969163	0.406364	0.213928	0.450213	1.32514	31
WP_TAMOXIFEN_METABOLISM	0.0976562	0.406402	0.199915	-0.645607	-1.42043	10
REACTOME_MITOCHONDRIAL_FATTY_ACID_BETA_OXIDATION_OF_SATURATED_FATTY_ACIDS	0.0976562	0.406402	0.199915	-0.645342	-1.41984	10
REACTOME_IRAK4_DEFICIENCY_TLR2_4	0.0978474	0.406402	0.199915	-0.607035	-1.4104	12
REACTOME_ERYTHROCYTES_TAKE_UP_OXYGEN_AND_RELEASE_CARBON_DIOXIDE	0.0978044	0.406402	0.202072	-0.79444	-1.36277	4
PID_RXR_VDR_PATHWAY	0.097561	0.406402	0.195789	-0.500851	-1.3508	22
REACTOME_INFECTION_WITH_MYCOBACTERIUM_TUBERCULOSIS	0.0971223	0.406402	0.191892	-0.476982	-1.33161	25
REACTOME_NOD1_2_SIGNALING_PATHWAY	0.0971922	0.406402	0.2114	0.454059	1.35527	32
WP_APOPTOSIS	0.0980736	0.406794	0.188204	-0.371838	-1.26361	71
REACTOME_O_GLYCOSYLATION_OF_TSR_DOMAIN_CONTAINING_PROTEINS	0.0985401	0.408181	0.191892	-0.43788	-1.30082	35
WP_MEVALONATE_PATHWAY	0.0990476	0.409733	0.195789	-0.693278	-1.39181	7
PID_GLYPICAN_1PATHWAY	0.0992509	0.409835	0.193813	-0.48989	-1.33357	23
REACTOME_SIGNALING_BY_INTERLEUKINS	0.0993377	0.409835	0.181383	-0.283643	-1.16746	337
REACTOME_PARACETAMOL_ADME	0.099631	0.409948	0.191892	-0.520214	-1.36845	19
REACTOME_IRAK1_RECRUITS_IKK_COMPLEX	0.0995851	0.409948	0.204295	0.558849	1.3868	14
REACTOME_RUNX2_REGULATES_OSTEOBLAST_DIFFERENTIATION	0.100569	0.412708	0.193813	-0.496664	-1.31456	21
REACTOME_PROCESSING_OF_DNA_DOUBLE_STRAND_BREAK_ENDS	0.100446	0.412708	0.2114	0.375286	1.26692	61
KEGG_ALPHA_LINOLENIC_ACID_METABOLISM	0.100971	0.413806	0.195789	-0.623234	-1.41551	11
REACTOME_COPI_DEPENDENT_GOLGI_TO_ER_RETROGRADE_TRAFFIC	0.101576	0.415184	0.184706	-0.358172	-1.25614	90
REACTOME_CELLULAR_RESPONSE_TO_HEAT_STRESS	0.101576	0.415184	0.184706	-0.351466	-1.24299	94
WP_DNA_DAMAGE_RESPONSE_ONLY_ATM_DEPENDENT	0.102888	0.41999	0.186433	-0.351416	-1.24152	97
REACTOME_NUCLEOTIDE_BINDING_DOMAIN_LEUCINE_RICH_REPEAT_CONTAINING_RECEPTOR_NLR_SIGNALING_PATHWAYS	0.103837	0.423306	0.208955	0.399784	1.27876	47
WP_PRIMARY_FOCAL_SEGMENTAL_GLOMERULOSCLEROSIS_FSGS	0.104317	0.424138	0.184706	-0.387751	-1.28529	62
REACTOME_SIGNALING_BY_ROBO_RECEPTORS	0.104218	0.424138	0.21925	0.285734	1.16889	203
REACTOME_NUCLEOTIDE_EXCISION_REPAIR	0.104895	0.425929	0.2114	0.317677	1.19605	110
BIOCARTA_FOSB_PATHWAY	0.105263	0.426137	0.195789	-0.840323	-1.33501	3
PID_SYNDECAN_2_PATHWAY	0.10536	0.426137	0.186433	-0.456325	-1.32279	30
REACTOME_TNF_SIGNALING	0.105263	0.426137	0.204295	0.375183	1.24306	55
REACTOME_GOLGI_CISTERNAE_PERICENTRIOLAR_STACK_REORGANIZATION	0.105769	0.42723	0.190023	-0.571393	-1.37633	14
WP_KIT_RECEPTOR_SIGNALING_PATHWAY	0.106033	0.427735	0.184706	-0.389578	-1.27379	58
REACTOME_MUCOPOLYSACCHARIDOSES	0.106796	0.429691	0.190023	-0.616889	-1.40109	11
KEGG_FOLATE_BIOSYNTHESIS	0.106742	0.429691	0.186433	-0.645287	-1.38533	9
WP_VITAMIN_D_RECEPTOR_PATHWAY	0.107143	0.430525	0.176694	-0.33903	-1.23888	114
REACTOME_NUCLEOTIDE_LIKE_PURINERGIC_RECEPTORS	0.108163	0.43406	0.193813	0.599434	1.37178	10
WP_HEMATOPOIETIC_STEM_CELL_DIFFERENTIATION	0.108929	0.436341	0.179782	-0.424608	-1.29306	40
REACTOME_AMPK_INHIBITS_CHREBP_TRANSCRIPTIONAL_ACTIVATION_ACTIVITY	0.109015	0.436341	0.195789	0.676282	1.39464	7
PID_ANTHRAX_PATHWAY	0.109589	0.437575	0.188204	-0.599553	-1.39301	12
WP_PANCREATIC_ADENOCARCINOMA_PATHWAY	0.109756	0.437575	0.176694	-0.360134	-1.2562	86
WP_ENDODERM_DIFFERENTIATION	0.109785	0.437575	0.208955	0.305791	1.18276	132
REACTOME_NRAGE_SIGNALS_DEATH_THROUGH_JNK	0.10989	0.437575	0.199915	0.371244	1.24784	58
REACTOME_SIGNALING_BY_GPCR	0.110211	0.437722	0.169571	-0.272231	-1.14153	407
PID_ATM_PATHWAY	0.110151	0.437722	0.197822	0.445045	1.32837	32
WP_RETT_SYNDROME_CAUSING_GENES	0.11036	0.437753	0.202072	0.403381	1.27629	42
WP_TRANSCRIPTION_FACTOR_REGULATION_IN_ADIPOGENESIS	0.110701	0.437979	0.181383	-0.511049	-1.34435	19
WP_HIPPOCAMPAL_SYNAPTOGENESIS_AND_NEUROGENESIS	0.110694	0.437979	0.183024	-0.49041	-1.32264	22
REACTOME_REGULATION_OF_PTEN_GENE_TRANSCRIPTION	0.111111	0.439038	0.199915	0.36875	1.2402	60
REACTOME_FOXO_MEDIATED_TRANSCRIPTION	0.111511	0.440054	0.17822	-0.393365	-1.26533	53
REACTOME_METHYLATION	0.111984	0.441358	0.186433	-0.579947	-1.37191	13
WP_FLUOROACETIC_ACID_TOXICITY	0.112186	0.441588	0.184706	-0.711424	-1.38737	6
REACTOME_INTERLEUKIN_12_FAMILY_SIGNALING	0.112701	0.442576	0.176694	-0.403849	-1.26174	45
REACTOME_FORMATION_OF_INCISION_COMPLEX_IN_GG_NER	0.112867	0.442576	0.199915	0.400597	1.27265	43
PID_RHOA_REG_PATHWAY	0.112867	0.442576	0.199915	0.402366	1.28374	45
PID_SYNDECAN_4_PATHWAY	0.113383	0.444035	0.179782	-0.461127	-1.31397	28
REACTOME_CHOLINE_CATABOLISM	0.113949	0.445686	0.184706	-0.733592	-1.35203	5
REACTOME_INTERLEUKIN_12_SIGNALING	0.114236	0.446241	0.173748	-0.41918	-1.27694	39
REACTOME_AFLATOXIN_ACTIVATION_AND_DETOXIFICATION	0.114563	0.446391	0.183024	-0.612804	-1.39182	11
REACTOME_FORMATION_OF_SENESCENCE_ASSOCIATED_HETEROCHROMATIN_FOCI_SAHF	0.114563	0.446391	0.183024	-0.610424	-1.38641	11
REACTOME_DAP12_INTERACTIONS	0.115108	0.447948	0.175204	-0.470711	-1.3141	25
PID_SYNDECAN_1_PATHWAY	0.116487	0.451608	0.173748	-0.414034	-1.26732	42
REACTOME_ACTIVATION_OF_BH3_ONLY_PROTEINS	0.116379	0.451608	0.191892	0.461713	1.32642	28
BIOCARTA_CFTR_PATHWAY	0.116327	0.451608	0.186433	0.596331	1.36468	10
REACTOME_SHC1_EVENTS_IN_EGFR_SIGNALING	0.117188	0.452876	0.181383	-0.631128	-1.38857	10
REACTOME_NEF_MEDIATED_CD8_DOWN_REGULATION	0.117988	0.452876	0.179782	-0.707554	-1.37983	6
WP_ROBO4_AND_VEGF_SIGNALING_PATHWAYS_CROSSTALK	0.117988	0.452876	0.179782	-0.706269	-1.37732	6
KEGG_LIMONENE_AND_PINENE_DEGRADATION	0.117978	0.452876	0.176694	-0.640082	-1.37416	9
REACTOME_PREDNISONE_ADME	0.117764	0.452876	0.183024	-0.784791	-1.34621	4
PID_HDAC_CLASSIII_PATHWAY	0.117978	0.452876	0.176694	-0.485333	-1.32116	23
REACTOME_CYTOCHROME_P450_ARRANGED_BY_SUBSTRATE_TYPE	0.117647	0.452876	0.175204	-0.436876	-1.28801	34
REACTOME_RHOF_GTPASE_CYCLE	0.117117	0.452876	0.195789	0.400084	1.26586	42
PID_P75_NTR_PATHWAY	0.118834	0.455555	0.193813	0.367712	1.24382	62
REACTOME_ROLE_OF_PHOSPHOLIPIDS_IN_PHAGOCYTOSIS	0.119318	0.455713	0.176694	-0.521348	-1.34939	18
PID_ALPHA_SYNUCLEIN_PATHWAY	0.119266	0.455713	0.173748	-0.463298	-1.31272	27
SIG_PIP3_SIGNALING_IN_B_LYMPHOCYTES	0.119306	0.455713	0.190023	0.443622	1.298	30
WP_CYTOKINES_AND_INFLAMMATORY_RESPONSE	0.119772	0.45688	0.176694	-0.662082	-1.38245	8
WP_METABOLISM_OF_SPHINGOLIPIDS_IN_ER_AND_GOLGI_APPARATUS	0.119926	0.456904	0.173748	-0.507847	-1.33592	19
WP_ESTROGEN_METABOLISM_WP697	0.120388	0.456938	0.17822	-0.606285	-1.37701	11
REACTOME_INTERLEUKIN_10_SIGNALING	0.120527	0.456938	0.175204	-0.525326	-1.34246	17
REACTOME_IRAK2_MEDIATED_ACTIVATION_OF_TAK1_COMPLEX	0.120408	0.456938	0.183024	0.587804	1.34517	10
REACTOME_TICAM1_TRAF6_DEPENDENT_INDUCTION_OF_TAK1_COMPLEX	0.120408	0.456938	0.183024	0.592416	1.35572	10
REACTOME_DNA_DAMAGE_TELOMERE_STRESS_INDUCED_SENESCENCE	0.121101	0.458549	0.172324	-0.463174	-1.31237	27
REACTOME_NR1H2_NR1H3_REGULATE_GENE_EXPRESSION_LINKED_TO_LIPOGENESIS	0.121673	0.459338	0.175204	-0.661153	-1.38051	8
WP_PENTOSE_PHOSPHATE_METABOLISM	0.121905	0.459338	0.175204	-0.679824	-1.3648	7
PID_A6B1_A6B4_INTEGRIN_PATHWAY	0.121864	0.459338	0.169571	-0.413112	-1.2645	42
REACTOME_ACTIVATION_OF_PUMA_AND_TRANSLOCATION_TO_MITOCHONDRIA	0.121849	0.459338	0.184706	0.632093	1.35766	8
REACTOME_GLYOXYLATE_METABOLISM_AND_GLYCINE_DEGRADATION	0.122302	0.459705	0.169571	-0.467994	-1.30651	25
REACTOME_PROCESSING_AND_ACTIVATION_OF_SUMO	0.122449	0.459705	0.181383	0.584588	1.3378	10
REACTOME_ALPHA_PROTEIN_KINASE_1_SIGNALING_PATHWAY	0.122449	0.459705	0.181383	0.58748	1.34442	10
REACTOME_EGFR_TRANSACTIVATION_BY_GASTRIN	0.123574	0.460888	0.173748	-0.659909	-1.37791	8
REACTOME_DERMATAN_SULFATE_BIOSYNTHESIS	0.123596	0.460888	0.172324	-0.63682	-1.36715	9
REACTOME_MODULATION_BY_MTB_OF_HOST_IMMUNE_SYSTEM	0.12381	0.460888	0.173748	-0.677352	-1.35984	7
WP_MRNA_PROTEIN_AND_METABOLITE_INDUCATION_PATHWAY_BY_CYCLOSPORIN_A	0.12381	0.460888	0.173748	-0.676423	-1.35797	7
REACTOME_REGULATION_OF_HMOX1_EXPRESSION_AND_ACTIVITY	0.123772	0.460888	0.176694	-0.727255	-1.34035	5
WP_INTEGRINMEDIATED_CELL_ADHESION	0.123264	0.460888	0.165657	-0.348922	-1.2243	89
WP_MACROPHAGE_MARKERS	0.123732	0.460888	0.179782	0.728837	1.35602	5
WP_REGULATORY_CIRCUITS_OF_THE_STAT3_SIGNALING_PATHWAY	0.124101	0.461415	0.168238	-0.379756	-1.25879	62
PID_IL2_PI3K_PATHWAY	0.124767	0.463335	0.170932	-0.449148	-1.29076	29
REACTOME_SIGNAL_ATTENUATION	0.125468	0.465378	0.170932	-0.634952	-1.36314	9
REACTOME_TRAF6_MEDIATED_INDUCTION_OF_TAK1_COMPLEX_WITHIN_TLR4_COMPLEX	0.125761	0.465903	0.17822	0.552591	1.34719	13
REACTOME_GROWTH_HORMONE_RECEPTOR_SIGNALING	0.126394	0.467688	0.169571	-0.492576	-1.30233	20
BIOCARTA_RANKL_PATHWAY	0.128155	0.470831	0.172324	-0.594773	-1.35086	11
PID_IL5_PATHWAY	0.128155	0.470831	0.172324	-0.592962	-1.34675	11
WP_SPHINGOLIPID_METABOLISM_INTEGRATED_PATHWAY	0.127698	0.470831	0.165657	-0.465755	-1.30026	25
PID_EPHRINB_REV_PATHWAY	0.128159	0.470831	0.165657	-0.458409	-1.2918	26
REACTOME_COLLAGEN_FORMATION	0.127434	0.470831	0.164406	-0.354303	-1.2179	77
REACTOME_DOWNREGULATION_OF_SMAD2_3_SMAD4_TRANSCRIPTIONAL_ACTIVITY	0.127983	0.470831	0.183024	0.43988	1.28705	30
WP_KENNEDY_PATHWAY_FROM_SPHINGOLIPIDS	0.128846	0.471672	0.170932	-0.557687	-1.34332	14
WP_MELANOMA	0.128748	0.471672	0.16318	-0.375812	-1.25849	64
REACTOME_MAP2K_AND_MAPK_ACTIVATION	0.128571	0.471672	0.164406	-0.413233	-1.25842	40
WP_LET7_INHIBITION_OF_ES_CELL_REPROGRAMMING	0.129666	0.472884	0.172324	-0.72279	-1.33212	5
REACTOME_EGFR_INTERACTS_WITH_PHOSPHOLIPASE_C_GAMMA	0.129666	0.472884	0.172324	-0.721957	-1.33058	5
REACTOME_TIE2_SIGNALING	0.129944	0.472884	0.168238	-0.518846	-1.3259	17
BIOCARTA_MRP_PATHWAY	0.129921	0.472884	0.172324	0.840908	1.3523	3
WP_MIRNA_BIOGENESIS	0.129897	0.472884	0.176694	0.702044	1.37226	6
WP_AEROBIC_GLYCOLYSIS	0.130346	0.473791	0.175204	0.56251	1.34137	12
REACTOME_ALPHA_OXIDATION_OF_PHYTANATE	0.131528	0.47679	0.169571	-0.699294	-1.36372	6
WP_SEROTONIN_RECEPTOR_2_AND_ELKSRFGATA4_SIGNALING	0.131635	0.47679	0.17822	0.510223	1.31479	17
REACTOME_REGULATION_OF_NPAS4_GENE_EXPRESSION	0.131417	0.47679	0.175204	0.566141	1.32794	11
REACTOME_ADAPTIVE_IMMUNE_SYSTEM	0.132193	0.47825	0.15017	-0.257099	-1.11102	600
REACTOME_BRANCHED_CHAIN_AMINO_ACID_CATABOLISM	0.132827	0.478302	0.166934	-0.489192	-1.29478	21
REACTOME_SIGNALING_BY_SCF_KIT	0.132616	0.478302	0.161979	-0.413309	-1.24837	38
PID_CERAMIDE_PATHWAY	0.132616	0.478302	0.161979	-0.406886	-1.24544	42
SA_CASPASE_CASCADE	0.13278	0.478302	0.175204	0.540198	1.34051	14
PID_HIV_NEF_PATHWAY	0.133087	0.478678	0.164406	-0.440238	-1.27616	30
REACTOME_ENDOGENOUS_STEROLS	0.133829	0.479114	0.164406	-0.491596	-1.29974	20
WP_BURN_WOUND_HEALING	0.133568	0.479114	0.159647	-0.356602	-1.23585	80
KEGG_CALCIUM_SIGNALING_PATHWAY	0.133663	0.479114	0.191892	0.301038	1.15669	128
WP_GASTRIC_ACID_PRODUCTION	0.133733	0.479114	0.170932	0.778877	1.35174	4
REACTOME_TRANSFERRIN_ENDOCYTOSIS_AND_RECYCLING	0.134078	0.47945	0.164406	-0.444607	-1.27771	29
REACTOME_CASPASE_ACTIVATION_VIA_DEPENDENCE_RECEPTORS_IN_THE_ABSENCE_OF_LIGAND	0.134615	0.480814	0.176694	0.607395	1.33316	9
REACTOME_SUMOYLATION_OF_SUMOYLATION_PROTEINS	0.135371	0.482954	0.17822	0.42016	1.2734	34
REACTOME_REGULATION_OF_BACH1_ACTIVITY	0.135922	0.484361	0.166934	-0.587802	-1.33503	11
REACTOME_ASPIRIN_ADME	0.136531	0.484851	0.161979	-0.496424	-1.30588	19
REACTOME_INSERTION_OF_TAIL_ANCHORED_PROTEINS_INTO_THE_ENDOPLASMIC_RETICULUM_MEMBRANE	0.136531	0.484851	0.161979	-0.496395	-1.3058	19
REACTOME_G2_M_CHECKPOINTS	0.136476	0.484851	0.190023	0.298397	1.14243	127
WP_BLOOD_CLOTTING_CASCADE	0.137996	0.48725	0.16318	-0.544081	-1.34171	15
SA_G1_AND_S_PHASES	0.137525	0.48725	0.166934	-0.566663	-1.34048	13
REACTOME_CYTOSOLIC_SULFONATION_OF_SMALL_MOLECULES	0.137546	0.48725	0.161979	-0.488769	-1.29226	20
PID_RET_PATHWAY	0.137993	0.48725	0.158514	-0.409178	-1.2359	38
PID_PLK1_PATHWAY	0.137698	0.48725	0.179782	0.38547	1.22983	45
REACTOME_RUNX3_REGULATES_P14_ARF	0.138783	0.489469	0.16318	-0.651136	-1.3596	8
REACTOME_LYSINE_CATABOLISM	0.138943	0.489474	0.165657	-0.581787	-1.35173	12
PID_PDGFRA_PATHWAY	0.139405	0.490541	0.160801	-0.487899	-1.28996	20
REACTOME_SIGNALING_BY_FLT3_FUSION_PROTEINS	0.140221	0.491173	0.159647	-0.493369	-1.29784	19
REACTOME_NONSENSE_MEDIATED_DECAY_NMD	0.13981	0.491173	0.183024	0.307441	1.16047	112
REACTOME_FGFR2_ALTERNATIVE_SPLICING	0.140044	0.491173	0.175204	0.44644	1.27188	27
BIOCARTA_CASPASE_PATHWAY	0.140127	0.491173	0.172324	0.50724	1.3071	17
REACTOME_TRIGLYCERIDE_BIOSYNTHESIS	0.140449	0.491414	0.160801	-0.625554	-1.34297	9
REACTOME_MASTL_FACILITATES_MITOTIC_PROGRESSION	0.140816	0.49214	0.168238	0.572682	1.31056	10
WP_PROSTAGLANDIN_SIGNALING	0.141454	0.493808	0.164406	-0.562519	-1.33068	13
REACTOME_SUMOYLATION_OF_TRANSCRIPTION_COFACTORS	0.141892	0.494778	0.176694	0.38978	1.23326	42
REACTOME_RECYCLING_OF_BILE_ACIDS_AND_SALTS	0.142322	0.495718	0.159647	-0.623333	-1.3382	9
REACTOME_PURINE_SALVAGE	0.142857	0.495902	0.16318	-0.579318	-1.346	12
PID_TAP63_PATHWAY	0.142857	0.495902	0.155242	-0.389306	-1.22193	46
REACTOME_INACTIVATION_OF_CDC42_AND_RAC1	0.142857	0.495902	0.169571	0.620349	1.33244	8
PID_ATF2_PATHWAY	0.143113	0.496231	0.155242	-0.389694	-1.22593	47
WP_PROSURVIVAL_SIGNALING_OF_NEUROPROTECTIN_D1	0.144814	0.501567	0.161979	-0.578787	-1.34476	12
WP_EICOSANOID_METABOLISM_VIA_CYTOCHROME_P450_MONOOXYGENASES_PATHWAY	0.145709	0.503535	0.16318	-0.75311	-1.29187	4
REACTOME_SCAVENGING_BY_CLASS_B_RECEPTORS	0.145709	0.503535	0.16318	-0.751944	-1.28987	4
REACTOME_HDR_THROUGH_SINGLE_STRAND_ANNEALING_SSA	0.146018	0.504039	0.172324	0.408665	1.24924	36
REACTOME_SIGNALING_BY_ERBB2	0.146691	0.505795	0.153159	-0.388225	-1.2213	47
REACTOME_MRNA_EDITING	0.147348	0.506929	0.160801	-0.717192	-1.3218	5
WP_PI3KAKTMTOR_VITAMIN_D3_SIGNALING	0.147303	0.506929	0.165657	0.531551	1.31905	14
REACTOME_VLDL_CLEARANCE	0.147705	0.507591	0.161979	-0.751496	-1.2891	4
WP_OVERVIEW_OF_PROINFLAMMATORY_AND_PROFIBROTIC_MEDIATORS	0.14794	0.507658	0.156312	-0.476444	-1.29697	23
WP_PHOTODYNAMIC_THERAPYINDUCED_NFE2L2_NRF2_SURVIVAL_SIGNALING	0.148218	0.507658	0.156312	-0.477486	-1.28779	22
WP_DNA_DAMAGE_RESPONSE	0.148148	0.507658	0.151149	-0.367574	-1.2309	64
BIOCARTA_FEEDER_PATHWAY	0.148571	0.508305	0.157403	-0.670356	-1.34579	7
REACTOME_RECYCLING_PATHWAY_OF_L1	0.148746	0.508337	0.152145	-0.401906	-1.2302	42
BIOCARTA_EGFR_SMRTE_PATHWAY	0.149515	0.5102	0.158514	-0.580526	-1.31851	11
REACTOME_NEF_MEDIATES_DOWN_MODULATION_OF_CELL_SURFACE_RECEPTORS_BY_RECRUITING_THEM_TO_CLATHRIN_ADAPTERS	0.149621	0.5102	0.156312	-0.503017	-1.30194	18
REACTOME_SUMOYLATION_OF_TRANSCRIPTION_FACTORS	0.149789	0.510209	0.165657	0.491707	1.29436	18
BIOCARTA_GSK3_PATHWAY	0.151515	0.514951	0.155242	-0.500241	-1.29476	18
REACTOME_ARACHIDONIC_ACID_METABOLISM	0.15146	0.514951	0.152145	-0.416396	-1.237	35
WP_CANONICAL_AND_NONCANONICAL_TGFB_SIGNALING	0.152542	0.517303	0.154191	-0.50404	-1.28807	17
WP_GALANIN_RECEPTOR_PATHWAY	0.152542	0.517303	0.154191	-0.503605	-1.28695	17
WP_PERTURBATIONS_TO_HOSTCELL_AUTOPHAGY_INDUCED_BY_SARSCOV2_PROTEINS	0.153409	0.517965	0.154191	-0.497921	-1.28875	18
REACTOME_ATTACHMENT_AND_ENTRY	0.153137	0.517965	0.152145	-0.477992	-1.25739	19
REACTOME_ASSEMBLY_OF_THE_HIV_VIRION	0.15304	0.517965	0.16318	0.512631	1.30575	16
WP_CALORIC_RESTRICTION_AND_AGING	0.153361	0.517965	0.16318	0.614484	1.31984	8
WP_BIOSYNTHESIS_AND_REGENERATION_OF_TETRAHYDROBIOPTERIN_AND_CATABOLISM_OF_PHENYLALANINE	0.154286	0.518091	0.154191	-0.668135	-1.34133	7
REACTOME_LTC4_CYSLTR_MEDIATED_IL4_PRODUCTION	0.153693	0.518091	0.158514	-0.748596	-1.28413	4
REACTOME_DAP12_SIGNALING	0.153846	0.518091	0.153159	-0.475081	-1.2813	22
WP_INSULIN_SIGNALING	0.154246	0.518091	0.146416	-0.309623	-1.17084	153
REACTOME_P38MAPK_EVENTS	0.154158	0.518091	0.159647	0.533978	1.30182	13
REACTOME_GLOBAL_GENOME_NUCLEOTIDE_EXCISION_REPAIR_GG_NER	0.154567	0.518471	0.172324	0.331989	1.18473	84
REACTOME_RHOD_GTPASE_CYCLE	0.154804	0.518704	0.148262	-0.384191	-1.22878	51
REACTOME_INTERLEUKIN_37_SIGNALING	0.154989	0.518761	0.16318	0.499917	1.28823	17
REACTOME_ADVANCED_GLYCOSYLATION_ENDPRODUCT_RECEPTOR_SIGNALING	0.15625	0.520721	0.155242	-0.601081	-1.32246	10
REACTOME_PYRIMIDINE_CATABOLISM	0.15625	0.520721	0.155242	-0.60091	-1.32209	10
REACTOME_SIGNALING_BY_ALK	0.155963	0.520721	0.15017	-0.446342	-1.26468	27
PID_P38_MK2_PATHWAY	0.156118	0.520721	0.161979	0.486439	1.2805	18
REACTOME_BIOSYNTHESIS_OF_SPECIALIZED_PRORESOLVING_MEDIATORS_SPMS	0.156556	0.521177	0.155242	-0.566315	-1.31579	12
REACTOME_GLUCONEOGENESIS	0.15704	0.522005	0.148262	-0.447444	-1.26091	26
WP_PDGF_PATHWAY	0.157143	0.522005	0.147331	-0.401613	-1.22303	40
REACTOME_NOTCH_HLH_TRANSCRIPTION_PATHWAY	0.157328	0.522057	0.16318	0.434404	1.24797	28
BIOCARTA_REELIN_PATHWAY	0.158095	0.522753	0.152145	-0.666482	-1.33801	7
WP_OLIGODENDROCYTE_SPECIFICATION_AND_DIFFERENTIATION_LEADING_TO_MYELIN_COMPONENTS_FOR_CNS	0.158095	0.522753	0.152145	-0.512763	-1.285	16
REACTOME_SIGNALING_BY_RETINOIC_ACID	0.158088	0.522753	0.149208	-0.417155	-1.22987	34
REACTOME_MITOTIC_TELOPHASE_CYTOKINESIS	0.158215	0.522753	0.157403	0.530405	1.2931	13
REACTOME_REGULATION_OF_TP53_ACTIVITY_THROUGH_ASSOCIATION_WITH_CO_FACTORS	0.158859	0.524321	0.157403	0.545499	1.3008	12
REACTOME_ACYL_CHAIN_REMODELLING_OF_PI	0.159696	0.526138	0.151149	-0.640562	-1.33752	8
BIOCARTA_SM_PATHWAY	0.159751	0.526138	0.158514	0.524404	1.30132	14
REACTOME_DISEASES_ASSOCIATED_WITH_GLYCOSYLATION_PRECURSOR_BIOSYNTHESIS	0.160681	0.527061	0.15017	-0.534358	-1.31773	15
REACTOME_CELLULAR_HEXOSE_TRANSPORT	0.160681	0.527061	0.15017	-0.532857	-1.31403	15
WP_MODULATION_OF_PI3KAKTMTOR_SIGNALING_BY_BIOACTIVE_SPHINGOLIPIDS	0.161538	0.527061	0.151149	-0.543743	-1.30973	14
WP_SEROTONIN_AND_ANXIETY	0.161165	0.527061	0.152145	-0.573982	-1.30364	11
REACTOME_HSP90_CHAPERONE_CYCLE_FOR_STEROID_HORMONE_RECEPTORS_SHR_IN_THE_PRESENCE_OF_LIGAND	0.161634	0.527061	0.144631	-0.384745	-1.22345	49
WP_NONGENOMIC_ACTIONS_OF_125_DIHYDROXYVITAMIN_D3	0.161232	0.527061	0.146416	-0.363695	-1.19935	60
WP_EGFR_TYROSINE_KINASE_INHIBITOR_RESISTANCE	0.161739	0.527061	0.142901	-0.342088	-1.18891	84
KEGG_PHOSPHATIDYLINOSITOL_SIGNALING_SYSTEM	0.161663	0.527061	0.166934	0.341199	1.1739	69
WP_COHESIN_COMPLEX_CORNELIA_DE_LANGE_SYNDROME	0.161638	0.527061	0.160801	0.415679	1.25125	33
BIOCARTA_RNAPOL3_PATHWAY	0.161426	0.527061	0.158514	0.650002	1.34044	7
WP_TRANSSULFURATION_PATHWAY	0.162109	0.52771	0.152145	-0.5966	-1.3126	10
REACTOME_UPTAKE_AND_FUNCTION_OF_ANTHRAX_TOXINS	0.163107	0.528726	0.151149	-0.573765	-1.30315	11
REACTOME_NUCLEAR_EVENTS_STIMULATED_BY_ALK_SIGNALING_IN_CANCER	0.162879	0.528726	0.149208	-0.486166	-1.25833	18
PID_ARF6_TRAFFICKING_PATHWAY	0.163082	0.528726	0.144631	-0.388152	-1.20237	44
REACTOME_TRANSLATION	0.163062	0.528726	0.138805	-0.282094	-1.1376	273
REACTOME_VITAMIN_B5_PANTOTHENATE_METABOLISM	0.163462	0.528766	0.15017	-0.54297	-1.30787	14
WP_EXTRACELLULAR_VESICLEMEDIATED_SIGNALING_IN_RECIPIENT_CELLS	0.163303	0.528766	0.146416	-0.440948	-1.24939	27
REACTOME_SEROTONIN_RECEPTORS	0.163673	0.528894	0.153159	-0.742042	-1.27288	4
WP_CYTOSINE_METHYLATION	0.163866	0.528963	0.157403	0.608496	1.30698	8
WP_IRON_METABOLISM_IN_PLACENTA	0.164062	0.529046	0.151149	-0.594452	-1.30788	10
REACTOME_MAPK1_ERK2_ACTIVATION	0.164794	0.53085	0.147331	-0.61406	-1.31829	9
REACTOME_NGF_INDEPENDANT_TRKA_ACTIVATION	0.165992	0.533595	0.153159	-0.801033	-1.2726	3
REACTOME_BUDDING_AND_MATURATION_OF_HIV_VIRION	0.165948	0.533595	0.158514	0.428165	1.23005	28
KEGG_NEUROACTIVE_LIGAND_RECEPTOR_INTERACTION	0.166667	0.53465	0.138805	-0.30723	-1.14087	131
BIOCARTA_ETC_PATHWAY	0.166667	0.53465	0.157403	0.589216	1.29326	9
WP_ARSENIC_METABOLISM_AND_REACTIVE_OXYGEN_SPECIES_GENERATION	0.16699	0.535132	0.149208	-0.567966	-1.28998	11
REACTOME_TRAIL_SIGNALING	0.167619	0.535479	0.147331	-0.662485	-1.32999	7
REACTOME_CHREBP_ACTIVATES_METABOLIC_GENE_EXPRESSION	0.167619	0.535479	0.147331	-0.65886	-1.32271	7
REACTOME_NEUROTRANSMITTER_RELEASE_CYCLE	0.167273	0.535479	0.143759	-0.407962	-1.22034	36
WP_SARS_CORONAVIRUS_AND_INNATE_IMMUNITY	0.168242	0.536913	0.146416	-0.526938	-1.29943	15
REACTOME_VITAMIN_C_ASCORBATE_METABOLISM	0.169202	0.537154	0.146416	-0.634514	-1.32489	8
WP_CLASSICAL_PATHWAY_OF_STEROIDOGENESIS_WITH_GLUCOCORTICOID_AND_MINERALOCORTICOID_METABOLISM	0.171103	0.537154	0.145516	-0.632622	-1.32094	8
WP_BILE_ACIDS_SYNTHESIS_AND_ENTEROHEPATIC_CIRCULATION	0.171103	0.537154	0.145516	-0.632252	-1.32017	8
REACTOME_SYNTHESIS_OF_5_EICOSATETRAENOIC_ACIDS	0.170213	0.537154	0.147331	-0.672935	-1.31232	6
WP_CELL_INTERACTIONS_OF_THE_PANCREATIC_CANCER_MICROENVIRONMENT	0.170923	0.537154	0.148262	-0.54854	-1.29761	13
REACTOME_REELIN_SIGNALLING_PATHWAY	0.170923	0.537154	0.148262	-0.701758	-1.29335	5
REACTOME_BETA_OXIDATION_OF_OCTANOYL_COA_TO_HEXANOYL_COA	0.170923	0.537154	0.148262	-0.701048	-1.29205	5
REACTOME_HEME_DEGRADATION	0.168932	0.537154	0.148262	-0.566158	-1.28587	11
WP_GLYCOLYSIS_IN_SENESCENCE	0.170874	0.537154	0.147331	-0.563938	-1.28083	11
REACTOME_SIGNAL_TRANSDUCTION_BY_L1	0.170778	0.537154	0.145516	-0.473494	-1.25323	21
REACTOME_ESTROGEN_DEPENDENT_NUCLEAR_EVENTS_DOWNSTREAM_OF_ESR_MEMBRANE_SIGNALING	0.169145	0.537154	0.144631	-0.473025	-1.25064	20
WP_FAMILIAL_PARTIAL_LIPODYSTROPHY	0.170863	0.537154	0.141225	-0.4435	-1.23813	25
WP_APOPTOSISRELATED_NETWORK_DUE_TO_ALTERED_NOTCH3_IN_OVARIAN_CANCER	0.169039	0.537154	0.141225	-0.379378	-1.21339	51
REACTOME_MEMBRANE_TRAFFICKING	0.169811	0.537154	0.131458	-0.252161	-1.08712	585
REACTOME_HCMV_LATE_EVENTS	0.170404	0.537154	0.159647	0.359633	1.18037	53
PID_ERBB_NETWORK_PATHWAY	0.171079	0.537154	0.151149	0.53932	1.28607	12
PID_HEDGEHOG_GLI_PATHWAY	0.171558	0.538035	0.159647	0.37827	1.20994	47
KEGG_SULFUR_METABOLISM	0.172211	0.53899	0.147331	-0.554189	-1.28761	12
REACTOME_SPHINGOLIPID_DE_NOVO_BIOSYNTHESIS	0.172043	0.53899	0.140406	-0.391803	-1.19928	42
WP_GABA_RECEPTOR_SIGNALING	0.172676	0.539349	0.144631	-0.471232	-1.24725	21
REACTOME_SIGNALING_BY_FGFR4	0.172542	0.539349	0.142901	-0.419131	-1.22051	32
REACTOME_DISEASES_OF_CARBOHYDRATE_METABOLISM	0.172862	0.539387	0.142901	-0.430318	-1.22618	28
REACTOME_TRANSPORT_OF_NUCLEOTIDE_SUGARS	0.174157	0.540915	0.142901	-0.604944	-1.29872	9
WP_MONOAMINE_TRANSPORT	0.174157	0.540915	0.142901	-0.469101	-1.27698	23
REACTOME_SIGNALING_BY_VEGF	0.174229	0.540915	0.140406	-0.328695	-1.16056	98
REACTOME_SIGNALING_BY_NOTCH1_PEST_DOMAIN_MUTANTS_IN_CANCER	0.174107	0.540915	0.157403	0.346794	1.15631	57
WP_PURINERGIC_SIGNALING	0.174098	0.540915	0.153159	0.488913	1.25987	17
REACTOME_ACYL_CHAIN_REMODELLING_OF_PC	0.175238	0.543502	0.143759	-0.503685	-1.26225	16
REACTOME_REGULATION_OF_HSF1_MEDIATED_HEAT_SHOCK_RESPONSE	0.175439	0.543578	0.137251	-0.344688	-1.18298	76
WP_NEUROTRANSMITTER_DISORDERS	0.176015	0.543814	0.144631	-0.669552	-1.30572	6
BIOCARTA_ACE2_PATHWAY	0.17603	0.543814	0.142057	-0.604123	-1.29696	9
WP_HIPPOMERLIN_SIGNALING_DYSREGULATION	0.176044	0.543814	0.1396	-0.328295	-1.16	99
PID_TELOMERASE_PATHWAY	0.176259	0.543935	0.138805	-0.360425	-1.19471	62
WP_CONVERSION_OF_ANGIOTENSINOGEN_TO_ANGIOTENSIN_II	0.176699	0.544205	0.144631	-0.847418	-1.23661	2
BIOCARTA_CARM1_PATHWAY	0.176591	0.544205	0.149208	0.543852	1.27566	11
REACTOME_PI_3K_CASCADE_FGFR3	0.177734	0.546303	0.144631	-0.587721	-1.29307	10
REACTOME_INTRINSIC_PATHWAY_FOR_APOPTOSIS	0.177677	0.546303	0.157403	0.369319	1.1889	49
REACTOME_NECTIN_NECL_TRANS_HETERODIMERIZATION	0.178197	0.54718	0.15017	0.640938	1.32175	7
REACTOME_GLI_PROTEINS_BIND_PROMOTERS_OF_HH_RESPONSIVE_GENES_TO_PROMOTE_TRANSCRIPTION	0.179048	0.54789	0.142057	-0.648392	-1.3017	7
WP_TYPE_III_INTERFERON_SIGNALING	0.179048	0.54789	0.142057	-0.648173	-1.30126	7
REACTOME_NR1H2_NR1H3_REGULATE_GENE_EXPRESSION_TO_LIMIT_CHOLESTEROL_UPTAKE	0.178782	0.54789	0.144631	-0.699478	-1.28915	5
REACTOME_GENE_SILENCING_BY_RNA	0.179138	0.54789	0.156312	0.338507	1.16461	68
REACTOME_METABOLISM_OF_ANGIOTENSINOGEN_TO_ANGIOTENSINS	0.179688	0.549025	0.143759	-0.584186	-1.28529	10
WP_GLYCEROPHOSPHOLIPID_BIOSYNTHETIC_PATHWAY	0.180297	0.5498	0.1396	-0.428918	-1.22219	28
REACTOME_DNA_DAMAGE_RECOGNITION_IN_GG_NER	0.18018	0.5498	0.155242	0.389551	1.20082	38
REACTOME_ORGANIC_ANION_TRANSPORTERS	0.180747	0.550083	0.143759	-0.697903	-1.28625	5
WP_NUCLEOTIDE_GPCRS	0.180672	0.550083	0.149208	0.600079	1.2889	8
REACTOME_INTRA_GOLGI_AND_RETROGRADE_GOLGI_TO_ER_TRAFFIC	0.181513	0.55187	0.131458	-0.292502	-1.13008	189
REACTOME_SIGNALING_BY_TGFB_FAMILY_MEMBERS	0.181818	0.552255	0.157403	0.299377	1.13643	117
NABA_BASEMENT_MEMBRANES	0.182819	0.553118	0.152145	0.403991	1.23074	35
REACTOME_ERBB2_REGULATES_CELL_MOTILITY	0.182556	0.553118	0.145516	0.510207	1.24386	13
WP_GPR40_PATHWAY	0.182556	0.553118	0.145516	0.514079	1.2533	13
REACTOME_CREB1_PHOSPHORYLATION_THROUGH_THE_ACTIVATION_OF_ADENYLATE_CYCLASE	0.182752	0.553118	0.146416	0.540765	1.26842	11
REACTOME_PHOSPHOLIPID_METABOLISM	0.183639	0.555055	0.130106	-0.292962	-1.12568	177
WP_MIRNAS_INVOLVED_IN_DNA_DAMAGE_RESPONSE	0.184615	0.556063	0.140406	-0.52449	-1.26336	14
BIOCARTA_ECM_PATHWAY	0.184557	0.556063	0.138805	-0.485737	-1.24129	17
REACTOME_RETROGRADE_TRANSPORT_AT_THE_TRANS_GOLGI_NETWORK	0.184725	0.556063	0.134273	-0.37422	-1.18999	49
REACTOME_REGULATION_OF_NPAS4_MRNA_TRANSLATION	0.184874	0.556063	0.147331	0.597069	1.28244	8
BIOCARTA_PLCD_PATHWAY	0.184584	0.556063	0.144631	0.695103	1.29325	5
BIOCARTA_EICOSANOID_PATHWAY	0.185255	0.556668	0.138805	-0.510388	-1.25862	15
REACTOME_THE_ROLE_OF_NEF_IN_HIV_1_REPLICATION_AND_DISEASE_PATHOGENESIS	0.185741	0.557043	0.138022	-0.45969	-1.23979	22
BIOCARTA_GATA3_PATHWAY	0.185714	0.557043	0.144631	0.551335	1.26171	10
REACTOME_INTESTINAL_ABSORPTION	0.186235	0.557068	0.143759	-0.790934	-1.25655	3
WP_NAD_METABOLISM_IN_ONCOGENEINDUCED_SENESCENCE_AND_MITOCHONDRIAL_DYSFUNCTIONASSOCIATED_SENESCENCE	0.185958	0.557068	0.138805	-0.467115	-1.23635	21
WP_IMATINIB_AND_CHRONIC_MYELOID_LEUKEMIA	0.186347	0.557068	0.13649	-0.465497	-1.22452	19
WP_HAIR_FOLLICLE_DEVELOPMENT_CYTODIFFERENTIATION_PART_3_OF_3	0.186472	0.557068	0.135741	-0.361976	-1.18354	58
REACTOME_PRESYNAPTIC_FUNCTION_OF_KAINATE_RECEPTORS	0.186837	0.557618	0.147331	0.482528	1.24342	17
REACTOME_ER_QUALITY_CONTROL_COMPARTMENT_ERQC	0.187732	0.559751	0.13649	-0.469234	-1.24062	20
REACTOME_INTERLEUKIN_36_PATHWAY	0.18835	0.560948	0.1396	-0.842869	-1.22997	2
REACTOME_SUMO_IS_TRANSFERRED_FROM_E1_TO_E2_UBE2I_UBC9	0.188679	0.560948	0.145516	0.630152	1.29951	7
REACTOME_P2Y_RECEPTORS	0.188679	0.560948	0.145516	0.630213	1.29963	7
BIOCARTA_ACH_PATHWAY	0.189139	0.561773	0.13649	-0.596757	-1.28114	9
BIOCARTA_P53HYPOXIA_PATHWAY	0.189591	0.56179	0.135741	-0.46856	-1.23883	20
WP_4HYDROXYTAMOXIFEN_DEXAMETHASONE_AND_RETINOIC_ACIDS_REGULATION_OF_P27_EXPRESSION	0.189394	0.56179	0.137251	-0.474122	-1.22716	18
REACTOME_ARYL_HYDROCARBON_RECEPTOR_SIGNALLING	0.189691	0.56179	0.143759	0.665208	1.30026	6
REACTOME_DOWNSTREAM_SIGNALING_OF_ACTIVATED_FGFR3	0.190207	0.562237	0.13649	-0.481102	-1.22945	17
PID_ARF6_PATHWAY	0.190388	0.562237	0.135002	-0.412444	-1.19559	30
REACTOME_EPH_EPHRIN_MEDIATED_REPULSION_OF_CELLS	0.190053	0.562237	0.132147	-0.371852	-1.18246	49
WP_MITOCHONDRIAL_BETAOXIDATION	0.191011	0.562581	0.135741	-0.594139	-1.27552	9
REACTOME_CASPASE_MEDIATED_CLEAVAGE_OF_CYTOSKELETAL_PROTEINS	0.191781	0.562581	0.138805	-0.536745	-1.24708	12
NABA_SECRETED_FACTORS	0.19171	0.562581	0.129443	-0.300632	-1.13384	150
REACTOME_DNA_DOUBLE_STRAND_BREAK_REPAIR	0.190931	0.562581	0.155242	0.288965	1.11767	132
BIOCARTA_PROTEASOME_PATHWAY	0.191304	0.562581	0.147331	0.473711	1.24935	19
REACTOME_SIGNALLING_TO_RAS	0.191304	0.562581	0.147331	0.474271	1.25082	19
REACTOME_MECP2_REGULATES_TRANSCRIPTION_FACTORS	0.191617	0.562581	0.140406	0.743641	1.29059	4
REACTOME_LINOLEIC_ACID_LA_METABOLISM	0.192381	0.563271	0.13649	-0.638136	-1.28111	7
WP_CHOLESTEROL_BIOSYNTHESIS_WITH_SKELETAL_DYSPLASIAS	0.192381	0.563271	0.13649	-0.63789	-1.28061	7
WP_INTERLEUKIN11_SIGNALING_PATHWAY	0.19292	0.56414	0.130777	-0.387665	-1.1874	41
REACTOME_SRP_DEPENDENT_COTRANSLATIONAL_PROTEIN_TARGETING_TO_MEMBRANE	0.193043	0.56414	0.129443	-0.317273	-1.14694	109
REACTOME_PHOSPHOLIPASE_C_MEDIATED_CASCADE_FGFR4	0.193424	0.564183	0.137251	-0.66063	-1.28832	6
REACTOME_MOLYBDENUM_COFACTOR_BIOSYNTHESIS	0.193424	0.564183	0.137251	-0.660416	-1.2879	6
WP_ESTROGEN_METABOLISM_WP5276	0.194286	0.565628	0.135741	-0.493418	-1.23652	16
REACTOME_MINERALOCORTICOID_BIOSYNTHESIS	0.194175	0.565628	0.137251	-0.841162	-1.22748	2
WP_PI3KAKTMTOR_SIGNALING_PATHWAY_AND_THERAPEUTIC_OPPORTUNITIES	0.195531	0.567646	0.133555	-0.415557	-1.19423	29
REACTOME_DECTIN_2_FAMILY	0.195519	0.567646	0.140406	0.527374	1.25758	12
REACTOME_ABC_TRANSPORTERS_IN_LIPID_HOMEOSTASIS	0.195519	0.567646	0.140406	0.534584	1.27477	12
REACTOME_NR1H2_AND_NR1H3_MEDIATED_SIGNALING	0.197133	0.571759	0.130106	-0.393328	-1.18802	38
REACTOME_RUNX3_REGULATES_WNT_SIGNALING	0.198095	0.574011	0.134273	-0.636406	-1.27763	7
KEGG_GLYCOSAMINOGLYCAN_BIOSYNTHESIS_HEPARAN_SULFATE	0.198502	0.574268	0.132846	-0.453617	-1.23483	23
PID_TRKR_PATHWAY	0.198556	0.574268	0.130106	-0.35744	-1.16777	57
REACTOME_INTERCONVERSION_OF_NUCLEOTIDE_DI_AND_TRIPHOSPHATES	0.2	0.577903	0.130777	-0.425409	-1.20537	27
REACTOME_FORMATION_OF_XYLULOSE_5_PHOSPHATE	0.200393	0.578122	0.135741	-0.682012	-1.25696	5
REACTOME_HOMOLOGOUS_DNA_PAIRING_AND_STRAND_EXCHANGE	0.20045	0.578122	0.146416	0.37362	1.18213	42
WP_AGERAGE_PATHWAY	0.201087	0.579367	0.129443	-0.353288	-1.16503	60
REACTOME_TRANSCRIPTION_OF_E2F_TARGETS_UNDER_NEGATIVE_CONTROL_BY_P107_RBL1_AND_P130_RBL2_IN_COMPLEX_WITH_HDAC1	0.201258	0.579367	0.140406	0.485553	1.23677	16
BIOCARTA_BARD1_PATHWAY	0.201681	0.580043	0.140406	0.585229	1.25701	8
WP_INTEGRATED_CANCER_PATHWAY	0.202509	0.581883	0.128143	-0.377341	-1.16888	44
REACTOME_RECEPTOR_TYPE_TYROSINE_PROTEIN_PHOSPHATASES	0.20339	0.583328	0.131458	-0.47695	-1.21884	17
REACTOME_TRANSCRIPTIONAL_ACTIVATION_OF_MITOCHONDRIAL_BIOGENESIS	0.203237	0.583328	0.128143	-0.361139	-1.16167	53
BIOCARTA_SUMO_PATHWAY	0.204124	0.584889	0.138022	0.657657	1.2855	6
REACTOME_INITIATION_OF_NUCLEAR_ENVELOPE_NE_REFORMATION	0.204348	0.584988	0.142057	0.465036	1.22647	19
REACTOME_DIGESTION_OF_DIETARY_CARBOHYDRATE	0.204724	0.585523	0.134273	0.791952	1.27358	3
WP_KREBS_CYCLE_DISORDERS	0.205479	0.587139	0.133555	-0.530701	-1.23304	12
REACTOME_HOMOLOGY_DIRECTED_REPAIR	0.20595	0.587938	0.145516	0.305169	1.13575	102
REACTOME_CD28_DEPENDENT_PI3K_AKT_SIGNALING	0.206439	0.588791	0.130777	-0.468544	-1.21272	18
REACTOME_SUMO_IS_CONJUGATED_TO_E1_UBA2_SAE1	0.206897	0.58955	0.135741	0.677005	1.25958	5
REACTOME_SEPARATION_OF_SISTER_CHROMATIDS	0.2075	0.590724	0.152145	0.27347	1.10003	180
WP_SLEEP_REGULATION	0.207865	0.591218	0.129443	-0.447493	-1.21816	23
REACTOME_TRANSCRIPTIONAL_REGULATION_BY_MECP2	0.208145	0.591469	0.143759	0.355669	1.14943	50
REACTOME_REGULATION_OF_MECP2_EXPRESSION_AND_ACTIVITY	0.208602	0.592223	0.1396	0.410881	1.19436	29
REACTOME_BMAL1_CLOCK_NPAS2_ACTIVATES_CIRCADIAN_GENE_EXPRESSION	0.208872	0.592445	0.128143	-0.433494	-1.19361	24
BIOCARTA_ERK5_PATHWAY	0.209393	0.592833	0.132147	-0.528536	-1.22801	12
BIOCARTA_RB_PATHWAY	0.209393	0.592833	0.132147	-0.528321	-1.22751	12
KEGG_GLYCOSPHINGOLIPID_BIOSYNTHESIS_GANGLIO_SERIES	0.209615	0.592918	0.130777	-0.51174	-1.23265	14
WP_INSULIN_SIGNALING_IN_ADIPOCYTES_DIABETIC_CONDITION	0.211027	0.593027	0.129443	-0.612065	-1.27801	8
WP_INSULIN_SIGNALING_IN_ADIPOCYTES_NORMAL_CONDITION	0.211027	0.593027	0.129443	-0.612065	-1.27801	8
REACTOME_INTERLEUKIN_RECEPTOR_SHC_SIGNALING	0.210332	0.593027	0.127505	-0.456597	-1.20111	19
WP_SPHINGOLIPID_PATHWAY	0.211191	0.593027	0.12564	-0.426103	-1.20077	26
BIOCARTA_VEGF_PATHWAY	0.211191	0.593027	0.12564	-0.426026	-1.20055	26
WP_MITOCHONDRIAL_IMMUNE_RESPONSE_TO_SARSCOV2	0.210432	0.593027	0.12564	-0.429515	-1.19909	25
WP_B_CELL_RECEPTOR_SIGNALING_PATHWAY	0.210648	0.593027	0.144631	0.316857	1.12782	81
PID_WNT_CANONICAL_PATHWAY	0.21087	0.593027	0.1396	0.462544	1.21989	19
REACTOME_REVERSIBLE_HYDRATION_OF_CARBON_DIOXIDE	0.212928	0.593046	0.128789	-0.608754	-1.2711	8
REACTOME_ATF6_ATF6_ALPHA_ACTIVATES_CHAPERONE_GENES	0.212891	0.593046	0.130777	-0.56731	-1.24816	10
REACTOME_FICOLINS_BIND_TO_REPETITIVE_CARBOHYDRATE_STRUCTURES_ON_THE_TARGET_CELL_SURFACE	0.212551	0.593046	0.133555	-0.782471	-1.2431	3
REACTOME_ZINC_EFFLUX_AND_COMPARTMENTALIZATION_BY_THE_SLC30_FAMILY	0.212551	0.593046	0.133555	-0.780305	-1.23966	3
REACTOME_TP53_REGULATES_TRANSCRIPTION_OF_GENES_INVOLVED_IN_G1_CELL_CYCLE_ARREST	0.212181	0.593046	0.131458	-0.515794	-1.22015	13
WP_IL17_SIGNALING_PATHWAY	0.212844	0.593046	0.126254	-0.420304	-1.1909	27
WP_SARSCOV2_INNATE_IMMUNITY_EVASION_AND_CELLSPECIFIC_IMMUNE_RESPONSE	0.2125	0.593046	0.124434	-0.387318	-1.1795	40
REACTOME_INTERACTIONS_OF_VPR_WITH_HOST_CELLULAR_PROTEINS	0.212389	0.593046	0.140406	0.383425	1.17209	36
WP_EFFECTS_OF_NITRIC_OXIDE	0.212185	0.593046	0.13649	0.57746	1.24032	8
WP_WHITE_FAT_CELL_DIFFERENTIATION	0.213755	0.594812	0.126876	-0.415522	-1.18402	28
WP_MICRORNA_NETWORK_ASSOCIATED_WITH_CHRONIC_LYMPHOCYTIC_LEUKEMIA	0.214145	0.595363	0.130777	-0.672136	-1.23876	5
REACTOME_ESTROGEN_BIOSYNTHESIS	0.2147	0.59623	0.129443	-0.648969	-1.26558	6
WP_CANCER_IMMUNOTHERAPY_BY_CTLA4_BLOCKADE	0.214844	0.59623	0.130106	-0.566539	-1.24646	10
REACTOME_EPHRIN_SIGNALING	0.215217	0.59673	0.138022	0.459542	1.21198	19
PID_IL23_PATHWAY	0.215909	0.598111	0.127505	-0.462304	-1.19657	18
REACTOME_COENZYME_A_BIOSYNTHESIS	0.21673	0.598991	0.127505	-0.608055	-1.26964	8
BIOCARTA_IRES_PATHWAY	0.217143	0.598991	0.127505	-0.627923	-1.2606	7
REACTOME_ORGANIC_CATION_ANION_ZWITTERION_TRANSPORT	0.21875	0.598991	0.128789	-0.564708	-1.24244	10
REACTOME_FORMYL_PEPTIDE_RECEPTORS_BIND_FORMYL_PEPTIDES_AND_MANY_OTHER_LIGANDS	0.216599	0.598991	0.132147	-0.777764	-1.23563	3
REACTOME_TERMINAL_PATHWAY_OF_COMPLEMENT	0.218623	0.598991	0.131458	-0.775672	-1.2323	3
REACTOME_SIGNALING_BY_FLT3_ITD_AND_TKD_MUTANTS	0.217391	0.598991	0.126876	-0.494681	-1.21989	15
WP_MTHFR_DEFICIENCY	0.218216	0.598991	0.126876	-0.452398	-1.1974	21
REACTOME_RET_SIGNALING	0.21875	0.598991	0.124434	-0.401154	-1.18269	34
REACTOME_CYCLIN_A_CDK2_ASSOCIATED_EVENTS_AT_S_PHASE_ENTRY	0.218531	0.598991	0.120985	-0.323244	-1.12035	82
REACTOME_EXTENSION_OF_TELOMERES	0.218679	0.598991	0.140406	0.357417	1.15059	49
WP_TRANSCRIPTION_COFACTORS_SKI_AND_SKIL_PROTEIN_PARTNERS	0.2173	0.598991	0.135002	0.460499	1.21221	18
REACTOME_GP1B_IX_V_ACTIVATION_SIGNALLING	0.218367	0.598991	0.132147	0.539298	1.23416	10
WP_PTDINS45P2_IN_CYTOKINESIS_PATHWAY	0.218367	0.598991	0.132147	0.540257	1.23635	10
BIOCARTA_TPO_PATHWAY	0.219512	0.600482	0.12564	-0.446031	-1.20295	22
REACTOME_RAC2_GTPASE_CYCLE	0.219684	0.600482	0.120985	-0.325671	-1.12865	80
REACTOME_GRB2_EVENTS_IN_ERBB2_SIGNALING	0.219917	0.600588	0.132846	0.48653	1.20733	14
REACTOME_CARBOXYTERMINAL_POST_TRANSLATIONAL_MODIFICATIONS_OF_TUBULIN	0.220524	0.601181	0.13649	0.38739	1.17408	34
REACTOME_DEFECTIVE_C1GALT1C1_CAUSES_TNPS	0.220408	0.601181	0.131458	0.538849	1.23313	10
REACTOME_DISEASES_OF_IMMUNE_SYSTEM	0.220974	0.601876	0.125033	-0.438332	-1.19322	23
WP_15Q112_COPY_NUMBER_VARIATION_SYNDROME	0.222222	0.604742	0.134273	0.569063	1.24903	9
BIOCARTA_STAT3_PATHWAY	0.222433	0.604784	0.12564	-0.603211	-1.25953	8
WP_ECTODERM_DIFFERENTIATION	0.223039	0.605364	0.144631	0.287863	1.10154	124
REACTOME_NETRIN_1_SIGNALING	0.222973	0.605364	0.138022	0.361152	1.14613	44
REACTOME_DEGRADATION_OF_THE_EXTRACELLULAR_MATRIX	0.223386	0.605772	0.119348	-0.309665	-1.12383	111
PID_CD8_TCR_PATHWAY	0.224956	0.609495	0.119348	-0.382018	-1.16373	39
REACTOME_RETINOID_CYCLE_DISEASE_EVENTS	0.226236	0.611699	0.124434	-0.602091	-1.25719	8
REACTOME_ACTIVATION_OF_THE_AP_1_FAMILY_OF_TRANSCRIPTION_FACTORS	0.226562	0.611699	0.126254	-0.557918	-1.2275	10
REACTOME_BETA_DEFENSINS	0.226453	0.611699	0.128143	-0.883765	-1.1893	1
REACTOME_REGULATION_OF_PTEN_MRNA_TRANSLATION	0.226496	0.611699	0.132846	0.565679	1.2416	9
REACTOME_SYNTHESIS_SECRETION_AND_DEACYLATION_OF_GHRELIN	0.227006	0.61236	0.126254	-0.523549	-1.21642	12
REACTOME_SIGNALING_BY_NOTCH	0.227941	0.614346	0.142901	0.271989	1.08759	168
REACTOME_PREVENTION_OF_PHAGOSOMAL_LYSOSOMAL_FUSION	0.228464	0.615219	0.122679	-0.575364	-1.23522	9
BIOCARTA_ACETAMINOPHEN_PATHWAY	0.228745	0.615438	0.128143	-0.768773	-1.22134	3
WP_PROLACTIN_SIGNALING_PATHWAY	0.229682	0.617011	0.118288	-0.335471	-1.14346	73
REACTOME_BASE_EXCISION_REPAIR	0.22973	0.617011	0.135741	0.358937	1.1391	44
REACTOME_NOTCH1_INTRACELLULAR_DOMAIN_REGULATES_TRANSCRIPTION	0.230248	0.61733	0.135741	0.359644	1.15037	47
REACTOME_PROCESSING_OF_CAPPED_INTRONLESS_PRE_MRNA	0.230108	0.61733	0.132147	0.400913	1.16538	29
REACTOME_MITOTIC_SPINDLE_CHECKPOINT	0.230769	0.618189	0.138022	0.294581	1.1091	110
REACTOME_MITOCHONDRIAL_FATTY_ACID_BETA_OXIDATION_OF_UNSATURATED_FATTY_ACIDS	0.232108	0.618647	0.123842	-0.641695	-1.25139	6
REACTOME_BETA_OXIDATION_OF_DECANOYL_COA_TO_OCTANOYL_COA_COA	0.232108	0.618647	0.123842	-0.640435	-1.24894	6
BIOCARTA_GH_PATHWAY	0.232014	0.618647	0.118815	-0.423364	-1.18192	25
KEGG_GLIOMA	0.231752	0.618647	0.119888	-0.347238	-1.14005	59
WP_PARKINUBIQUITIN_PROTEASOMAL_SYSTEM_PATHWAY	0.232143	0.618647	0.118288	-0.34097	-1.13624	63
REACTOME_SIGNALING_BY_NOTCH2	0.232104	0.618647	0.132147	0.400823	1.17277	30
WP_NAD_METABOLISM_SIRTUINS_AND_AGING	0.232653	0.619471	0.127505	0.532786	1.21926	10
WP_APOPTOSIS_MODULATION_BY_HSP70	0.233522	0.620859	0.121543	-0.461471	-1.17928	17
WP_MBDNF_AND_PROBDNF_REGULATION_OF_GABA_NEUROTRANSMISSION	0.233577	0.620859	0.119348	-0.399609	-1.16481	31
REACTOME_MRNA_CAPPING	0.234409	0.622534	0.130777	0.398149	1.15735	29
REACTOME_DAG_AND_IP3_SIGNALING	0.234767	0.62295	0.117766	-0.383701	-1.15894	38
REACTOME_RRNA_MODIFICATION_IN_THE_MITOCHONDRION	0.235294	0.623277	0.128789	0.56909	1.22234	8
REACTOME_NEUROTOXICITY_OF_CLOSTRIDIUM_TOXINS	0.235294	0.623277	0.128789	0.571089	1.22663	8
BIOCARTA_TSP1_PATHWAY	0.235977	0.624014	0.122679	-0.637984	-1.24416	6
REACTOME_MET_PROMOTES_CELL_MOTILITY	0.235816	0.624014	0.116739	-0.386417	-1.1673	37
WP_HYPOTHESIZED_PATHWAYS_IN_PATHOGENESIS_OF_CARDIOVASCULAR_DISEASE	0.236599	0.624736	0.119348	-0.424666	-1.1693	24
KEGG_ENDOMETRIAL_CANCER	0.236655	0.624736	0.116739	-0.359341	-1.14931	51
REACTOME_G_BETA_GAMMA_SIGNALLING_THROUGH_CDC42	0.236897	0.624842	0.128143	0.472703	1.20405	16
REACTOME_IONOTROPIC_ACTIVITY_OF_KAINATE_RECEPTORS	0.237643	0.625397	0.120985	-0.597495	-1.24759	8
KEGG_ABC_TRANSPORTERS	0.237918	0.625397	0.119348	-0.400633	-1.17002	33
REACTOME_CD28_CO_STIMULATION	0.237918	0.625397	0.119348	-0.405292	-1.15487	28
REACTOME_JNK_C_JUN_KINASES_PHOSPHORYLATION_AND_ACTIVATION_MEDIATED_BY_ACTIVATED_HUMAN_TAK1	0.237895	0.625397	0.128143	0.437458	1.19704	21
WP_SEROTONIN_HTR1_GROUP_AND_FOS_PATHWAY	0.239051	0.62776	0.117766	-0.397759	-1.15942	31
KEGG_BASE_EXCISION_REPAIR	0.239224	0.62776	0.129443	0.388607	1.16976	33
WP_CIRCADIAN_RHYTHM_GENES	0.23946	0.627846	0.112379	-0.288722	-1.09689	159
REACTOME_MET_RECEPTOR_RECYCLING	0.240234	0.628304	0.122108	-0.551685	-1.21378	10
REACTOME_INSULIN_RECEPTOR_RECYCLING	0.240367	0.628304	0.117766	-0.410021	-1.16177	27
REACTOME_RNA_POLYMERASE_I_TRANSCRIPTION	0.240449	0.628304	0.132147	0.35455	1.14037	48
PID_TOLL_ENDOGENOUS_PATHWAY	0.239915	0.628304	0.128143	0.464836	1.19783	17
REACTOME_RUNX2_REGULATES_BONE_DEVELOPMENT	0.241636	0.629923	0.118288	-0.405144	-1.15445	28
WP_CORTICOTROPINRELEASING_HORMONE_SIGNALING_PATHWAY	0.241681	0.629923	0.114267	-0.325402	-1.12281	78
WP_GLIOBLASTOMA_SIGNALING_PATHWAYS	0.241681	0.629923	0.114267	-0.324395	-1.11933	78
REACTOME_ASSEMBLY_AND_CELL_SURFACE_PRESENTATION_OF_NMDA_RECEPTORS	0.242647	0.631906	0.11725	-0.388258	-1.14467	34
REACTOME_NPAS4_REGULATES_EXPRESSION_OF_TARGET_GENES	0.242938	0.63213	0.118815	-0.458577	-1.17188	17
WP_LIPID_METABOLISM_PATHWAY	0.244395	0.635385	0.130777	0.416106	1.16119	25
BIOCARTA_CBL_PATHWAY	0.244618	0.635431	0.120985	-0.518858	-1.20553	12
REACTOME_SYNTHESIS_OF_LIPOXINS_LX	0.244939	0.63573	0.123257	-0.765569	-1.21625	3
REACTOME_KERATAN_SULFATE_DEGRADATION	0.248047	0.637971	0.119888	-0.546769	-1.20297	10
WP_TGFBETA_SIGNALING_IN_THYROID_CELLS_FOR_EPITHELIALMESENCHYMAL_TRANSITION	0.247619	0.637971	0.118288	-0.470822	-1.17989	16
KEGG_GLYCOSAMINOGLYCAN_BIOSYNTHESIS_CHONDROITIN_SULFATE	0.247655	0.637971	0.11725	-0.43718	-1.17908	22
KEGG_LINOLEIC_ACID_METABOLISM	0.248077	0.637971	0.118815	-0.487209	-1.17356	14
REACTOME_METABOLISM_OF_COFACTORS	0.247232	0.637971	0.116234	-0.440675	-1.15922	19
REACTOME_REGULATION_OF_TP53_ACTIVITY_THROUGH_PHOSPHORYLATION	0.247685	0.637971	0.132147	0.30462	1.09958	87
REACTOME_RNA_POLYMERASE_I_TRANSCRIPTION_INITIATION	0.247748	0.637971	0.130106	0.353137	1.12069	44
REACTOME_NRIF_SIGNALS_CELL_DEATH_FROM_THE_NUCLEUS	0.247379	0.637971	0.125033	0.465918	1.18676	16
REACTOME_REGULATION_OF_PTEN_LOCALIZATION	0.247863	0.637971	0.126254	0.548277	1.2034	9
REACTOME_COHESIN_LOADING_ONTO_CHROMATIN	0.246939	0.637971	0.123257	0.528657	1.20981	10
REACTOME_ACTIVATION_OF_PPARGC1A_PGC_1ALPHA_BY_PHOSPHORYLATION	0.247863	0.637971	0.126254	0.551354	1.21016	9
PID_RANBP2_PATHWAY	0.24846	0.638424	0.123257	0.51064	1.19776	11
REACTOME_DEFECTS_IN_BIOTIN_BTN_METABOLISM	0.249049	0.638536	0.117766	-0.592777	-1.23774	8
REACTOME_NFE2L2_REGULATES_PENTOSE_PHOSPHATE_PATHWAY_GENES	0.249049	0.638536	0.117766	-0.592657	-1.23749	8
KEGG_PRION_DISEASES	0.249538	0.638536	0.115734	-0.422107	-1.16226	24
PID_AVB3_OPN_PATHWAY	0.249538	0.638536	0.115734	-0.395769	-1.14725	30
REACTOME_PRE_NOTCH_PROCESSING_IN_THE_ENDOPLASMIC_RETICULUM	0.249485	0.638536	0.123257	0.625374	1.2224	6
WP_SMALL_CELL_LUNG_CANCER	0.25	0.638659	0.111463	-0.313178	-1.09888	89
REACTOME_POU5F1_OCT4_SOX2_NANOG_REPRESS_GENES_RELATED_TO_DIFFERENTIATION	0.25	0.638659	0.124434	0.564192	1.21182	8
WP_INTERLEUKIN1_IL1_STRUCTURAL_PATHWAY	0.250444	0.639264	0.112843	-0.353426	-1.12386	49
REACTOME_SIGNALING_BY_TGF_BETA_RECEPTOR_COMPLEX_IN_CANCER	0.250951	0.639499	0.11725	-0.590323	-1.23261	8
REACTOME_DEFECTS_IN_VITAMIN_AND_COFACTOR_METABOLISM	0.250929	0.639499	0.115734	-0.449059	-1.18727	20
REACTOME_ACTIVATED_NTRK3_SIGNALS_THROUGH_PI3K	0.251451	0.63979	0.118288	-0.630749	-1.23005	6
WP_ROLES_OF_CERAMIDES_IN_DEVELOPMENT_OF_INSULIN_RESISTANCE	0.251894	0.63979	0.116739	-0.449189	-1.16262	18
REACTOME_TRAFFICKING_OF_AMPA_RECEPTORS	0.251799	0.63979	0.113313	-0.416007	-1.16138	25
REACTOME_SYNTHESIS_OF_ACTIVE_UBIQUITIN_ROLES_OF_E1_AND_E2_ENZYMES	0.251627	0.63979	0.126254	0.393989	1.15278	30
REACTOME_CONSTITUTIVE_SIGNALING_BY_ABERRANT_PI3K_IN_CANCER	0.252269	0.640215	0.113787	-0.352747	-1.12651	52
WP_BIOSYNTHESIS_AND_TURNOVER_OF_1DEOXYSPHINGOID_BASES	0.252852	0.640405	0.116739	-0.588255	-1.2283	8
REACTOME_CHONDROITIN_SULFATE_BIOSYNTHESIS	0.253788	0.640405	0.116234	-0.447974	-1.15948	18
REACTOME_GAMMA_CARBOXYLATION_HYPUSINE_FORMATION_AND_ARYLSULFATASE_ACTIVATION	0.253546	0.640405	0.111918	-0.377989	-1.14184	37
WP_16P112_PROXIMAL_DELETION_SYNDROME	0.253076	0.640405	0.111463	-0.332494	-1.12255	69
REACTOME_SEMA4D_IN_SEMAPHORIN_SIGNALING	0.253796	0.640405	0.12564	0.412833	1.15212	24
REACTOME_ACTIVATED_TAK1_MEDIATES_P38_MAPK_ACTIVATION	0.253731	0.640405	0.124434	0.426833	1.17299	22
WP_PATHOGENESIS_OF_SARSCOV2_MEDIATED_BY_NSP9NSP10_COMPLEX	0.253669	0.640405	0.123257	0.594536	1.22606	7
REACTOME_OPSINS	0.254509	0.641679	0.119888	-0.86062	-1.15816	1
WP_COVID19_ADVERSE_OUTCOME_PATHWAY	0.255403	0.643406	0.118288	-0.658538	-1.2137	5
BIOCARTA_GHRELIN_PATHWAY	0.255765	0.643794	0.122679	0.590964	1.21869	7
REACTOME_ION_CHANNEL_TRANSPORT	0.256499	0.645115	0.109684	-0.290204	-1.08382	141
REACTOME_DOPAMINE_CLEARANCE_FROM_THE_SYNAPTIC_CLEFT	0.257485	0.646002	0.118815	-0.702912	-1.20576	4
REACTOME_UPTAKE_OF_DIETARY_COBALAMINS_INTO_ENTEROCYTES	0.257485	0.646002	0.118815	-0.702452	-1.20497	4
REACTOME_PI_3K_CASCADE_FGFR1	0.258317	0.646002	0.11725	-0.514663	-1.19578	12
REACTOME_BETA_OXIDATION_OF_VERY_LONG_CHAIN_FATTY_ACIDS	0.257812	0.646002	0.11725	-0.543112	-1.19492	10
REACTOME_TRISTETRAPROLIN_TTP_ZFP36_BINDS_AND_DESTABILIZES_MRNA	0.258004	0.646002	0.114751	-0.452281	-1.15579	17
PID_ARF_3PATHWAY	0.258303	0.646002	0.113313	-0.437035	-1.14965	19
KEGG_T_CELL_RECEPTOR_SIGNALING_PATHWAY	0.257895	0.646002	0.110122	-0.314161	-1.09037	81
REACTOME_ERYTHROCYTES_TAKE_UP_CARBON_DIOXIDE_AND_RELEASE_OXYGEN	0.258555	0.646074	0.11524	-0.583363	-1.21808	8
REACTOME_GLUTAMATE_AND_GLUTAMINE_METABOLISM	0.259332	0.646788	0.11725	-0.499537	-1.18169	13
REACTOME_MITOCHONDRIAL_IRON_SULFUR_CLUSTER_BIOGENESIS	0.259332	0.646788	0.11725	-0.499317	-1.18117	13
WP_ETHER_LIPID_BIOSYNTHESIS	0.25947	0.646788	0.114751	-0.444499	-1.15048	18
REACTOME_BASIGIN_INTERACTIONS	0.259962	0.647492	0.114751	-0.44178	-1.1693	21
KEGG_INOSITOL_PHOSPHATE_METABOLISM	0.260181	0.647515	0.126876	0.347777	1.12393	50
REACTOME_CD163_MEDIATING_AN_ANTI_INFLAMMATORY_RESPONSE	0.260456	0.647678	0.114751	-0.582138	-1.21552	8
REACTOME_ROBO_RECEPTORS_BIND_AKAP5	0.262357	0.650534	0.114267	-0.577555	-1.20596	8
BIOCARTA_TCRA_PATHWAY	0.263473	0.650534	0.11725	-0.699244	-1.19947	4
BIOCARTA_VOBESITY_PATHWAY	0.263473	0.650534	0.11725	-0.698959	-1.19898	4
REACTOME_REGULATION_OF_KIT_SIGNALING	0.26276	0.650534	0.113787	-0.475954	-1.1737	15
BIOCARTA_EGF_PATHWAY	0.262385	0.650534	0.111918	-0.403728	-1.14393	27
NABA_COLLAGENS	0.26362	0.650534	0.10882	-0.370839	-1.12968	39
REACTOME_COLLAGEN_CHAIN_TRIMERIZATION	0.26362	0.650534	0.10882	-0.370839	-1.12968	39
KEGG_GAP_JUNCTION	0.263158	0.650534	0.10882	-0.321042	-1.10183	76
REACTOME_TRANSCRIPTIONAL_REGULATION_BY_SMALL_RNAS	0.262443	0.650534	0.126254	0.350962	1.11993	46
PID_HIF1A_PATHWAY	0.263713	0.650534	0.120985	0.441318	1.16172	18
WP_MAMMARY_GLAND_DEVELOPMENT_PATHWAY_INVOLUTION_STAGE_4_OF_4	0.264045	0.650665	0.112843	-0.558108	-1.19817	9
BIOCARTA_RAB_PATHWAY	0.264188	0.650665	0.115734	-0.511052	-1.18739	12
WP_DOPAMINE_METABOLISM	0.265625	0.652988	0.11524	-0.536914	-1.18129	10
WP_REGUCALCIN_IN_PROXIMAL_TUBULE_EPITHELIAL_KIDNEY_CELLS	0.265343	0.652988	0.110122	-0.40545	-1.14257	26
REACTOME_TRANSPORT_OF_MATURE_MRNAS_DERIVED_FROM_INTRONLESS_TRANSCRIPTS	0.265766	0.652988	0.125033	0.354048	1.1202	42
WP_FATTY_ACID_OMEGAOXIDATION	0.266925	0.654039	0.114267	-0.615072	-1.19948	6
REACTOME_VITAMINS	0.267465	0.654039	0.116234	-0.695173	-1.19249	4
WP_AMPLIFICATION_AND_EXPANSION_OF_ONCOGENIC_PATHWAYS_AS_METASTATIC_TRAITS	0.267308	0.654039	0.113787	-0.47957	-1.15516	14
WP_H19_ACTION_RBE2F1_SIGNALING_AND_CDKBETACATENIN_ACTIVITY	0.267308	0.654039	0.113787	-0.479499	-1.15499	14
WP_PREGNANE_X_RECEPTOR_PATHWAY	0.267045	0.654039	0.112843	-0.441276	-1.14214	18
PID_ECADHERIN_NASCENT_AJ_PATHWAY	0.267025	0.654039	0.10925	-0.377168	-1.13921	38
REACTOME_RUNX3_REGULATES_YAP1_MEDIATED_TRANSCRIPTION	0.268041	0.654929	0.118288	0.61747	1.20694	6
WP_FOLATEALCOHOL_AND_CANCER_PATHWAY_HYPOTHESES	0.269962	0.655103	0.112379	-0.574675	-1.19994	8
REACTOME_PI_3K_CASCADE_FGFR2	0.269903	0.655103	0.113787	-0.521308	-1.18401	11
WP_AMPACTIVATED_PROTEIN_KINASE_SIGNALING	0.268739	0.655103	0.110122	-0.337295	-1.10285	58
REACTOME_DNA_REPAIR	0.269036	0.655103	0.132846	0.250885	1.05766	284
WP_MESODERMAL_COMMITMENT_PATHWAY	0.26988	0.655103	0.128789	0.279	1.07945	135
WP_ENDOPLASMIC_RETICULUM_STRESS_RESPONSE_IN_CORONAVIRUS_INFECTION	0.270023	0.655103	0.125033	0.355241	1.11595	41
REACTOME_RNA_POLYMERASE_III_TRANSCRIPTION_INITIATION_FROM_TYPE_3_PROMOTER	0.269397	0.655103	0.120985	0.389831	1.11992	28
REACTOME_SEMA4D_INDUCED_CELL_MIGRATION_AND_GROWTH_CONE_COLLAPSE	0.269397	0.655103	0.120985	0.428582	1.14425	20
REACTOME_CLASS_I_PEROXISOMAL_MEMBRANE_PROTEIN_IMPORT	0.269565	0.655103	0.121543	0.439229	1.15841	19
REACTOME_DRUG_MEDIATED_INHIBITION_OF_CDK4_CDK6_ACTIVITY	0.27112	0.656216	0.114267	-0.65242	-1.20242	5
REACTOME_SYNTHESIS_OF_PI	0.27112	0.656216	0.114267	-0.651983	-1.20162	5
REACTOME_UPTAKE_AND_FUNCTION_OF_DIPHTHERIA_TOXIN	0.270793	0.656216	0.113313	-0.610635	-1.19082	6
REACTOME_RESOLUTION_OF_ABASIC_SITES_AP_SITES	0.271689	0.65708	0.124434	0.364868	1.11186	37
KEGG_FOCAL_ADHESION	0.272269	0.657965	0.103958	-0.281827	-1.08238	179
REACTOME_CRISTAE_FORMATION	0.273834	0.661144	0.115734	0.471117	1.14856	13
WP_PILOCYTIC_ASTROCYTOMA	0.274227	0.661144	0.116739	0.613388	1.19897	6
REACTOME_PHOSPHORYLATION_OF_EMI1	0.274227	0.661144	0.116739	0.614256	1.20066	6
BIOCARTA_EOSINOPHILS_PATHWAY	0.274549	0.661404	0.114751	-0.854421	-1.14982	1
BIOCARTA_NFKB_PATHWAY	0.275093	0.662197	0.109684	-0.440926	-1.16577	20
BIOCARTA_CREM_PATHWAY	0.277445	0.667339	0.113787	0.70269	1.21952	4
REACTOME_EXTRINSIC_PATHWAY_OF_FIBRIN_CLOT_FORMATION	0.279441	0.668556	0.113313	-0.689569	-1.18287	4
REACTOME_REACTIONS_SPECIFIC_TO_THE_COMPLEX_N_GLYCAN_SYNTHESIS_PATHWAY	0.279468	0.668556	0.110122	-0.56421	-1.17809	8
WP_CEREBRAL_ORGANIC_ACIDURIAS_INCLUDING_DISEASES	0.279468	0.668556	0.110122	-0.564103	-1.17787	8
BIOCARTA_RNA_PATHWAY	0.279297	0.668556	0.111918	-0.531291	-1.16891	10
REACTOME_EFFECTS_OF_PIP2_HYDROLYSIS	0.278777	0.668556	0.10673	-0.402929	-1.12487	25
REACTOME_REGULATION_OF_GENE_EXPRESSION_IN_BETA_CELLS	0.279261	0.668556	0.11524	0.49963	1.17193	11
REACTOME_NADE_MODULATES_DEATH_SIGNALLING	0.278351	0.668556	0.115734	0.608888	1.19017	6
REACTOME_CRMPS_IN_SEMA3A_SIGNALING	0.280922	0.670996	0.116234	0.451211	1.1493	16
REACTOME_POLO_LIKE_KINASE_MEDIATED_EVENTS	0.280922	0.670996	0.116234	0.452015	1.15135	16
REACTOME_COSTIMULATION_BY_THE_CD28_FAMILY	0.281867	0.672732	0.10592	-0.349478	-1.10405	48
BIOCARTA_CCR3_PATHWAY	0.282158	0.672905	0.11524	0.461685	1.14568	14
REACTOME_DEFECTIVE_CHST3_CAUSES_SEDCJD	0.282398	0.672959	0.110565	-0.605072	-1.17997	6
REACTOME_WNT5A_DEPENDENT_INTERNALIZATION_OF_FZD2_FZD5_AND_ROR2	0.282908	0.673452	0.111463	-0.489958	-1.15903	13
REACTOME_ACTIVATION_OF_AMPK_DOWNSTREAM_OF_NMDARS	0.283302	0.673452	0.108394	-0.42621	-1.14949	22
PID_INTEGRIN1_PATHWAY	0.283394	0.673452	0.10592	-0.333821	-1.10264	61
REACTOME_NEUROTRANSMITTER_RECEPTORS_AND_POSTSYNAPTIC_SIGNAL_TRANSMISSION	0.283478	0.673452	0.103576	-0.282996	-1.06934	154
REACTOME_DIGESTION_AND_ABSORPTION	0.284644	0.673629	0.107972	-0.542287	-1.1642	9
WP_ENERGY_METABOLISM	0.284436	0.673629	0.105125	-0.356889	-1.11503	45
REACTOME_TELOMERE_C_STRAND_SYNTHESIS_INITIATION	0.283976	0.673629	0.113313	0.466236	1.13666	13
REACTOME_ACTIVATION_OF_MATRIX_METALLOPROTEINASES	0.284501	0.673629	0.116234	0.449262	1.1577	17
WP_TYPE_II_DIABETES_MELLITUS	0.284501	0.673629	0.116234	0.44949	1.15828	17
REACTOME_SEROTONIN_NEUROTRANSMITTER_RELEASE_CYCLE	0.285115	0.674227	0.11524	0.449281	1.14439	16
REACTOME_SLBP_DEPENDENT_PROCESSING_OF_REPLICATION_DEPENDENT_HISTONE_PRE_MRNAS	0.285421	0.674433	0.113787	0.496573	1.16476	11
REACTOME_TFAP2_AP_2_FAMILY_REGULATES_TRANSCRIPTION_OF_CELL_CYCLE_FACTORS	0.286004	0.675293	0.112843	0.640492	1.19165	5
REACTOME_BETA_OXIDATION_OF_HEXANOYL_COA_TO_BUTANOYL_COA	0.286837	0.675709	0.110565	-0.640792	-1.18099	5
REACTOME_ACTIVATED_NTRK2_SIGNALS_THROUGH_CDK5	0.286837	0.675709	0.110565	-0.640137	-1.17979	5
REACTOME_BETA_OXIDATION_OF_LAUROYL_COA_TO_DECANOYL_COA_COA	0.286837	0.675709	0.110565	-0.64006	-1.17965	5
REACTOME_GLYCOLYSIS	0.28733	0.676355	0.119888	0.321211	1.08951	63
WP_EFFECT_OF_PROGERIN_ON_GENES_INVOLVED_IN_HUTCHINSONGILFORD_PROGERIA_SYNDROME	0.287846	0.677054	0.115734	0.415596	1.14211	22
REACTOME_METALLOTHIONEINS_BIND_METALS	0.288577	0.678255	0.111463	-0.846289	-1.13887	1
REACTOME_LOSS_OF_FUNCTION_OF_SMAD2_3_IN_CANCER	0.289524	0.679445	0.107972	-0.592459	-1.18941	7
REACTOME_SIGNALLING_TO_P38_VIA_RIT_AND_RIN	0.28937	0.679445	0.110122	0.745063	1.19817	3
REACTOME_RUNX1_REGULATES_TRANSCRIPTION_OF_GENES_INVOLVED_IN_DIFFERENTIATION_OF_MYELOID_CELLS	0.290135	0.679846	0.10882	-0.600276	-1.17062	6
REACTOME_FCGAMMA_RECEPTOR_FCGR_DEPENDENT_PHAGOCYTOSIS	0.289982	0.679846	0.102822	-0.319306	-1.09121	74
WP_METABOLIC_REPROGRAMMING_IN_PANCREATIC_CANCER	0.292035	0.682869	0.102822	-0.362422	-1.11009	41
REACTOME_NEGATIVE_EPIGENETIC_REGULATION_OF_RRNA_EXPRESSION	0.291855	0.682869	0.118815	0.340916	1.08788	46
REACTOME_LECTIN_PATHWAY_OF_COMPLEMENT_ACTIVATION	0.292089	0.682869	0.111463	0.637907	1.18684	5
REACTOME_HDL_ASSEMBLY	0.295238	0.689187	0.10673	-0.589948	-1.18436	7
WP_OSTEOBLAST_SIGNALING	0.295238	0.689187	0.10673	-0.588543	-1.18154	7
PID_HEDGEHOG_2PATHWAY	0.295539	0.689194	0.105125	-0.434243	-1.1481	20
REACTOMEMATURATION_OF__SARS_COV_1_NUCLEOPROTEIN	0.295688	0.689194	0.111463	0.492287	1.15471	11
REACTOME_GENE_AND_PROTEIN_EXPRESSION_BY_JAK_STAT_SIGNALING_AFTER_INTERLEUKIN_12_STIMULATION	0.295956	0.689298	0.104344	-0.374429	-1.1039	34
WP_SULFATION_BIOTRANSFORMATION_REACTION	0.29666	0.690417	0.108394	-0.48276	-1.142	13
REACTOME_RRNA_PROCESSING_IN_THE_MITOCHONDRION	0.297741	0.692411	0.111011	0.491227	1.15222	11
REACTOME_MITOCHONDRIAL_CALCIUM_ION_TRANSPORT	0.298311	0.692693	0.105125	-0.422395	-1.1392	22
WP_IL7_SIGNALING_PATHWAY	0.298311	0.692693	0.105125	-0.422326	-1.13902	22
REACTOME_N_GLYCAN_TRIMMING_AND_ELONGATION_IN_THE_CIS_GOLGI	0.298625	0.692885	0.107972	-0.632821	-1.1663	5
REACTOME_METHIONINE_SALVAGE_PATHWAY	0.301741	0.692885	0.106323	-0.595004	-1.16034	6
WP_GLYCOSPHINGOLIPID_METABOLISM	0.301136	0.692885	0.105125	-0.430409	-1.11402	18
REACTOME_MAPK_TARGETS_NUCLEAR_EVENTS_MEDIATED_BY_MAP_KINASES	0.301095	0.692885	0.102822	-0.382158	-1.11394	31
WP_INTERACTIONS_BETWEEN_IMMUNE_CELLS_AND_MICRORNAS_IN_TUMOR_MICROENVIRONMENT	0.301136	0.692885	0.105125	-0.429877	-1.11264	18
REACTOME_SIGNALING_BY_ALK_IN_CANCER	0.30036	0.692885	0.10208	-0.339551	-1.09223	53
PID_P73PATHWAY	0.300527	0.692885	0.100633	-0.323374	-1.09176	69
REACTOME_CYTOPROTECTION_BY_HMOX1	0.301444	0.692885	0.10208	-0.330445	-1.0915	61
WP_CHROMOSOMAL_AND_MICROSATELLITE_INSTABILITY_IN_COLORECTAL_CANCER	0.301226	0.692885	0.100279	-0.320152	-1.08796	71
REACTOME_NON_INTEGRIN_MEMBRANE_ECM_INTERACTIONS	0.300917	0.692885	0.103197	-0.335398	-1.0831	56
KEGG_DNA_REPLICATION	0.301762	0.692885	0.114751	0.364434	1.11023	35
REACTOME_DNA_STRAND_ELONGATION	0.300216	0.692885	0.113787	0.374557	1.11797	32
PID_S1P_META_PATHWAY	0.299578	0.692885	0.112379	0.433231	1.14043	18
REACTOME_ACTIVATION_OF_SMO	0.299363	0.692885	0.112843	0.443565	1.14302	17
PID_P38_GAMMA_DELTA_PATHWAY	0.299795	0.692885	0.110565	0.489695	1.14863	11
WP_GPCRS_CLASS_A_RHODOPSINLIKE	0.302752	0.694521	0.11725	0.292633	1.0755	92
REACTOME_SUMO_IS_PROTEOLYTICALLY_PROCESSED	0.303093	0.694521	0.110122	0.597303	1.16752	6
REACTOME_INTERACTION_WITH_CUMULUS_CELLS_AND_THE_ZONA_PELLUCIDA	0.30315	0.694521	0.10714	0.737397	1.18584	3
REACTOME_ACYL_CHAIN_REMODELLING_OF_PS	0.303846	0.695533	0.105521	-0.465342	-1.12088	14
WP_APOPTOSIS_MODULATION_AND_SIGNALING	0.304042	0.695533	0.0999277	-0.315045	-1.07665	74
REACTOME_FIBRONECTIN_MATRIX_FORMATION	0.304519	0.696107	0.10673	-0.627747	-1.15695	5
WP_BENZOAPYRENE_METABOLISM	0.304762	0.696147	0.104733	-0.581866	-1.16814	7
WP_LDLRAD4_AND_WHAT_WE_KNOW_ABOUT_IT	0.306667	0.698725	0.104344	-0.579382	-1.16315	7
BIOCARTA_COMP_PATHWAY	0.306796	0.698725	0.105521	-0.505809	-1.14881	11
REACTOME_SHC_MEDIATED_CASCADE_FGFR4	0.306796	0.698725	0.105521	-0.505087	-1.14717	11
WP_PARKINSONS_DISEASE_PATHWAY	0.306569	0.698725	0.101714	-0.367947	-1.09307	35
REACTOME_ION_HOMEOSTASIS	0.307965	0.699802	0.0995791	-0.359112	-1.09995	41
REACTOME_CELL_CELL_COMMUNICATION	0.307826	0.699802	0.09855	-0.296216	-1.06798	108
WP_PHOTODYNAMIC_THERAPYINDUCED_HIF1_SURVIVAL_SIGNALING	0.307522	0.699802	0.113787	0.359018	1.09748	36
REACTOME_NITRIC_OXIDE_STIMULATES_GUANYLATE_CYCLASE	0.308176	0.699802	0.110122	0.436002	1.11056	16
REACTOME_BINDING_OF_TCF_LEF_CTNNB1_TO_TARGET_GENE_PROMOTERS	0.308571	0.699934	0.103958	-0.578188	-1.16076	7
REACTOME_SIGNALING_BY_FGFR1_IN_DISEASE	0.308688	0.699934	0.10208	-0.381393	-1.10558	30
BIOCARTA_TRKA_PATHWAY	0.309198	0.700062	0.105521	-0.492027	-1.14318	12
REACTOME_GAP_JUNCTION_ASSEMBLY	0.308989	0.700062	0.102822	-0.412522	-1.12296	23
REACTOME_LYSOSPHINGOLIPID_AND_LPA_RECEPTORS	0.311155	0.700077	0.105125	-0.490998	-1.14079	12
WP_VALPROIC_ACID_PATHWAY	0.311787	0.700077	0.103197	-0.544107	-1.13611	8
REACTOME_NUCLEOTIDE_SALVAGE	0.310409	0.700077	0.10208	-0.428847	-1.13383	20
REACTOME_DIGESTION_OF_DIETARY_LIPID	0.310621	0.700077	0.10673	-0.834347	-1.1228	1
WP_ERK_PATHWAY_IN_HUNTINGTONS_DISEASE	0.311538	0.700077	0.103958	-0.463871	-1.11734	14
PID_INTEGRIN5_PATHWAY	0.311538	0.700077	0.103958	-0.463067	-1.1154	14
REACTOME_SIALIC_ACID_METABOLISM	0.311688	0.700077	0.101714	-0.378224	-1.10139	32
WP_CAMKK2_PATHWAY	0.310409	0.700077	0.10208	-0.373885	-1.0919	33
KEGG_ADIPOCYTOKINE_SIGNALING_PATHWAY	0.311927	0.700077	0.100991	-0.333688	-1.07757	56
WP_MYOMETRIAL_RELAXATION_AND_CONTRACTION_PATHWAYS	0.311594	0.700077	0.118815	0.273902	1.05881	134
REACTOME_E3_UBIQUITIN_LIGASES_UBIQUITINATE_TARGET_PROTEINS	0.311512	0.700077	0.114267	0.338941	1.07678	43
BIOCARTA_CHREBP_PATHWAY	0.310782	0.700077	0.110122	0.441192	1.10688	15
REACTOME_VITAMIN_B2_RIBOFLAVIN_METABOLISM	0.312373	0.70057	0.10714	0.629012	1.17029	5
REACTOME_UB_SPECIFIC_PROCESSING_PROTEASES	0.312941	0.700825	0.116739	0.26718	1.05927	153
REACTOME_RUNX1_REGULATES_GENES_INVOLVED_IN_MEGAKARYOCYTE_DIFFERENTIATION_AND_PLATELET_FUNCTION	0.312775	0.700825	0.112379	0.3629	1.10556	35
REACTOME_METABOLISM_OF_PORPHYRINS	0.313321	0.701166	0.10208	-0.417659	-1.12643	22
REACTOME_INTERLEUKIN_23_SIGNALING	0.314342	0.701644	0.104733	-0.623054	-1.1483	5
REACTOME_VITAMIN_B1_THIAMIN_METABOLISM	0.314342	0.701644	0.104733	-0.622283	-1.14688	5
REACTOME_TACHYKININ_RECEPTORS_BIND_TACHYKININS	0.314563	0.701644	0.103958	-0.785771	-1.14665	2
REACTOME_NEF_MEDIATED_DOWNREGULATION_OF_MHC_CLASS_I_COMPLEX_CELL_SURFACE_EXPRESSION	0.314453	0.701644	0.104344	-0.519464	-1.14289	10
PID_ER_NONGENOMIC_PATHWAY	0.315068	0.701644	0.114267	0.356561	1.08655	37
REACTOME_NUCLEAR_PORE_COMPLEX_NPC_DISASSEMBLY	0.314978	0.701644	0.111918	0.359679	1.09575	35
REACTOME_TRNA_MODIFICATION_IN_THE_MITOCHONDRION	0.315126	0.701644	0.10882	0.531115	1.14077	8
BIOCARTA_INFLAM_PATHWAY	0.316406	0.702203	0.103958	-0.518066	-1.13982	10
REACTOME_ACYL_CHAIN_REMODELLING_OF_PE	0.31569	0.702203	0.10208	-0.454734	-1.12138	15
REACTOME_B_WICH_COMPLEX_POSITIVELY_REGULATES_RRNA_EXPRESSION	0.315985	0.702203	0.100991	-0.384701	-1.0962	28
REACTOME_TELOMERE_MAINTENANCE	0.316742	0.702203	0.113313	0.315255	1.06931	63
REACTOME_BICARBONATE_TRANSPORTERS	0.316562	0.702203	0.108394	0.555341	1.14523	7
REACTOME_RUNX1_REGULATES_TRANSCRIPTION_OF_GENES_INVOLVED_IN_DIFFERENTIATION_OF_KERATINOCYTES	0.316562	0.702203	0.108394	0.556041	1.14667	7
REACTOME_PHOSPHATE_BOND_HYDROLYSIS_BY_NUDT_PROTEINS	0.318095	0.704696	0.10208	-0.573632	-1.15161	7
REACTOME_BASE_EXCISION_REPAIR_AP_SITE_FORMATION	0.318471	0.705023	0.10882	0.433626	1.11741	17
PID_AR_NONGENOMIC_PATHWAY	0.318872	0.705404	0.110122	0.371631	1.08736	30
WP_NEPHROTIC_SYNDROME	0.319343	0.70594	0.0992333	-0.364231	-1.08203	35
BIOCARTA_CTCF_PATHWAY	0.321561	0.708361	0.0999277	-0.424651	-1.12274	20
KEGG_MTOR_SIGNALING_PATHWAY	0.321364	0.708361	0.0978773	-0.340938	-1.07707	48
REACTOME_GOLGI_ASSOCIATED_VESICLE_BIOGENESIS	0.321101	0.708361	0.0992333	-0.331186	-1.0695	56
REACTOME_ONCOGENE_INDUCED_SENESCENCE	0.321586	0.708361	0.110565	0.371157	1.09245	31
REACTOME_APEX1_INDEPENDENT_RESOLUTION_OF_AP_SITES_VIA_THE_SINGLE_NUCLEOTIDE_REPLACEMENT_PATHWAY	0.320755	0.708361	0.107554	0.554407	1.14331	7
WP_IL4_SIGNALING_PATHWAY	0.322064	0.708908	0.0972151	-0.335621	-1.07344	51
REACTOME_GOLGI_TO_ER_RETROGRADE_TRANSPORT	0.324232	0.713172	0.0943564	-0.286426	-1.05485	123
WP_MITOCHONDRIAL_FATTY_ACID_SYNTHESIS_PATHWAY	0.330754	0.713856	0.100633	-0.586044	-1.14287	6
WP_LNCRNAMEDIATED_MECHANISMS_OF_THERAPEUTIC_RESISTANCE	0.330754	0.713856	0.100633	-0.586019	-1.14282	6
REACTOME_SIGNALING_BY_NOTCH1_T_7_9_NOTCH1_M1580_K2555_TRANSLOCATION_MUTANT	0.329524	0.713856	0.0999277	-0.568477	-1.14126	7
BIOCARTA_RARRXR_PATHWAY	0.333333	0.713856	0.0992333	-0.565612	-1.13551	7
REACTOME_AKT_PHOSPHORYLATES_TARGETS_IN_THE_NUCLEUS	0.332031	0.713856	0.100991	-0.512117	-1.12673	10
REACTOME_ROLE_OF_LAT2_NTAL_LAB_ON_CALCIUM_MOBILIZATION	0.330724	0.713856	0.101351	-0.482453	-1.12094	12
REACTOME_REGULATION_BY_C_FLIP	0.330798	0.713856	0.0995791	-0.536714	-1.12068	8
REACTOME_PHYSIOLOGICAL_FACTORS	0.326214	0.713856	0.101714	-0.492408	-1.11837	11
WP_ID_SIGNALING_PATHWAY	0.330059	0.713856	0.101714	-0.470749	-1.11359	13
WP_DOPAMINERGIC_NEUROGENESIS	0.327619	0.713856	0.100279	-0.443687	-1.11189	16
BIOCARTA_EIF_PATHWAY	0.333333	0.713856	0.0992333	-0.442667	-1.10933	16
REACTOME_INHIBITION_OF_REPLICATION_INITIATION_OF_DAMAGED_DNA_BY_RB1_E2F1	0.332024	0.713856	0.101351	-0.467103	-1.10497	13
PID_LPA4_PATHWAY	0.328846	0.713856	0.100633	-0.455349	-1.09681	14
REACTOME_FGFR1_MUTANT_RECEPTOR_ACTIVATION	0.333333	0.713856	0.0982123	-0.401465	-1.09286	23
REACTOME_DEADENYLATION_OF_MRNA	0.333333	0.713856	0.0982123	-0.401279	-1.09235	23
WP_LEPTININSULIN_SIGNALING_OVERLAP	0.330769	0.713856	0.100279	-0.451863	-1.08842	14
PID_RETINOIC_ACID_PATHWAY	0.325279	0.713856	0.0992333	-0.381363	-1.08669	28
REACTOME_DOWNSTREAM_SIGNALING_OF_ACTIVATED_FGFR2	0.333333	0.713856	0.0988903	-0.419285	-1.08522	18
REACTOME_SIGNALING_BY_NTRK2_TRKB	0.332717	0.713856	0.0975449	-0.393945	-1.08471	24
KEGG_BASAL_CELL_CARCINOMA	0.326786	0.713856	0.096563	-0.343042	-1.07672	46
WP_NEURODEGENERATION_WITH_BRAIN_IRON_ACCUMULATION_NBIA_SUBTYPES_PATHWAY	0.329159	0.713856	0.0962406	-0.348826	-1.07152	43
REACTOME_MITOCHONDRIAL_PROTEIN_IMPORT	0.326715	0.713856	0.0972151	-0.324395	-1.07151	61
REACTOME_TRANSLATION_OF_SARS_COV_2_STRUCTURAL_PROTEINS	0.326606	0.713856	0.0982123	-0.330066	-1.06588	56
REACTOME_SARS_COV_2_ACTIVATES_MODULATES_INNATE_AND_ADAPTIVE_IMMUNE_RESPONSES	0.328494	0.713856	0.0972151	-0.301618	-1.06574	99
WP_CLEAR_CELL_RENAL_CELL_CARCINOMA_PATHWAYS	0.325664	0.713856	0.0962406	-0.308642	-1.06094	77
WP_MALE_INFERTILITY	0.332155	0.713856	0.0949752	-0.300538	-1.05519	92
REACTOME_TRANSCRIPTIONAL_REGULATION_BY_RUNX1	0.32619	0.713856	0.114751	0.264966	1.05184	156
REACTOME_VIRAL_MESSENGER_RNA_SYNTHESIS	0.329571	0.713856	0.110565	0.334985	1.06421	43
WP_CARDIAC_PROGENITOR_DIFFERENTIATION	0.329571	0.713856	0.110565	0.335058	1.06444	43
KEGG_LONG_TERM_DEPRESSION	0.328947	0.713856	0.10882	0.322225	1.0676	55
REACTOME_TRANSCRIPTIONAL_ACTIVITY_OF_SMAD2_SMAD3_SMAD4_HETEROTRIMER	0.332579	0.713856	0.110122	0.331987	1.0729	50
BIOCARTA_MEF2D_PATHWAY	0.324841	0.713856	0.107554	0.429952	1.10794	17
REACTOME_CGMP_EFFECTS	0.325866	0.713856	0.104733	0.470607	1.12221	12
REACTOME_DNA_REPLICATION_INITIATION	0.331933	0.713856	0.105521	0.523879	1.12523	8
WP_CELL_DIFFERENTIATION_INDEX	0.331933	0.713856	0.105521	0.524174	1.12587	8
WP_IRINOTECAN_PATHWAY	0.331237	0.713856	0.105521	0.546265	1.12651	7
REACTOME_TYPE_I_HEMIDESMOSOME_ASSEMBLY	0.32906	0.713856	0.10714	0.517779	1.13646	9
REACTOME_FLT3_SIGNALING_BY_CBL_MUTANTS	0.3286	0.713856	0.103958	0.622813	1.15876	5
WP_ASPIRIN_AND_MIRNAS	0.333984	0.714124	0.100633	-0.509576	-1.12114	10
WP_15Q133_COPY_NUMBER_VARIATION_SYNDROME	0.334615	0.714124	0.0995791	-0.450536	-1.08522	14
REACTOME_CA_DEPENDENT_EVENTS	0.334559	0.714124	0.0968878	-0.366159	-1.07952	34
PID_REELIN_PATHWAY	0.334572	0.714124	0.0975449	-0.378595	-1.0788	28
KEGG_ECM_RECEPTOR_INTERACTION	0.334501	0.714124	0.0940503	-0.311595	-1.05889	71
KEGG_AMINO_SUGAR_AND_NUCLEOTIDE_SUGAR_METABOLISM	0.335677	0.715399	0.0940503	-0.356859	-1.08709	39
REACTOME_CELL_JUNCTION_ORGANIZATION	0.335677	0.715399	0.0940503	-0.303321	-1.0512	80
REACTOME_FGFR2B_LIGAND_BINDING_AND_ACTIVATION	0.335953	0.715494	0.100633	-0.611417	-1.12685	5
REACTOME_NTRK2_ACTIVATES_RAC1	0.337325	0.717649	0.101351	-0.66656	-1.1434	4
REACTOME_SIGNALING_BY_FGFR3	0.337662	0.717649	0.0968878	-0.371003	-1.08036	32
REACTOME_RHO_GTPASES_ACTIVATE_IQGAPS	0.337545	0.717649	0.095288	-0.380906	-1.0734	26
PID_FRA_PATHWAY	0.338262	0.718429	0.096563	-0.374894	-1.08674	30
REACTOME_TELOMERE_EXTENSION_BY_TELOMERASE	0.338947	0.719389	0.104344	0.398464	1.09034	21
PID_EPHB_FWD_PATHWAY	0.339192	0.719412	0.0934449	-0.354469	-1.07981	39
REACTOME_DEFENSINS	0.339806	0.719465	0.0992333	-0.775121	-1.13111	2
REACTOME_OTHER_INTERLEUKIN_SIGNALING	0.340149	0.719465	0.096563	-0.416831	-1.10206	20
WP_TRIACYLGLYCERIDE_SYNTHESIS	0.340149	0.719465	0.096563	-0.416757	-1.10187	20
WP_OVARIAN_INFERTILITY	0.33945	0.719465	0.0959207	-0.382327	-1.0833	27
PID_VEGF_VEGFR_PATHWAY	0.340824	0.719906	0.0968878	-0.521882	-1.1204	9
REACTOME_NOTCH3_ACTIVATION_AND_TRANSMISSION_OF_SIGNAL_TO_THE_NUCLEUS	0.340807	0.719906	0.107972	0.386941	1.0798	25
WP_PURINE_METABOLISM_AND_RELATED_DISORDERS	0.341328	0.720478	0.0959207	-0.416237	-1.09494	19
BIOCARTA_IL10_PATHWAY	0.341797	0.720482	0.0992333	-0.507809	-1.11725	10
REACTOME_ERYTHROPOIETIN_ACTIVATES_PHOSPHOINOSITIDE_3_KINASE_PI3K	0.341748	0.720482	0.0988903	-0.486698	-1.1054	11
REACTOME_VEGF_LIGAND_RECEPTOR_INTERACTIONS	0.342857	0.721372	0.0975449	-0.561627	-1.12751	7
REACTOME_SCAVENGING_BY_CLASS_A_RECEPTORS	0.342857	0.721372	0.0975449	-0.438502	-1.0989	16
REACTOME_ACTIVATION_OF_ATR_IN_RESPONSE_TO_REPLICATION_STRESS	0.34292	0.721372	0.10673	0.349323	1.06784	36
REACTOME_NEPHRIN_FAMILY_INTERACTIONS	0.343173	0.721412	0.0956031	-0.41517	-1.09213	19
REACTOME_BIOSYNTHESIS_OF_MARESINS	0.347305	0.721489	0.0995791	-0.657691	-1.12819	4
REACTOME_IRS_ACTIVATION	0.347305	0.721489	0.0995791	-0.657245	-1.12742	4
REACTOME_DOPAMINE_RECEPTORS	0.345631	0.721489	0.0982123	-0.770768	-1.12476	2
REACTOME_SENSORY_PERCEPTION_OF_SALTY_TASTE	0.345631	0.721489	0.0982123	-0.770075	-1.12375	2
WP_HYPOTHETICAL_CRANIOFACIAL_DEVELOPMENT_PATHWAY	0.343811	0.721489	0.0992333	-0.607514	-1.11966	5
WP_GENES_TARGETED_BY_MIRNAS_IN_ADIPOCYTES	0.344423	0.721489	0.0988903	-0.477637	-1.10975	12
BIOCARTA_RECK_PATHWAY	0.347909	0.721489	0.096563	-0.52989	-1.10643	8
WP_CELLTYPE_DEPENDENT_SELECTIVITY_OF_CCK2R_SIGNALING	0.345631	0.721489	0.0982123	-0.485755	-1.10326	11
REACTOME_ADENYLATE_CYCLASE_INHIBITORY_PATHWAY	0.345776	0.721489	0.0988903	-0.463657	-1.09682	13
REACTOME_SYNTHESIS_OF_PIPS_AT_THE_EARLY_ENDOSOME_MEMBRANE	0.346667	0.721489	0.0968878	-0.43717	-1.09556	16
PID_S1P_S1P1_PATHWAY	0.345351	0.721489	0.0968878	-0.410936	-1.08766	21
WP_RELATIONSHIP_BETWEEN_INFLAMMATION_COX2_AND_EGFR	0.347249	0.721489	0.096563	-0.4099	-1.08491	21
BIOCARTA_RELA_PATHWAY	0.348077	0.721489	0.0972151	-0.447828	-1.0787	14
BIOCARTA_VIP_PATHWAY	0.343808	0.721489	0.0956031	-0.390905	-1.07634	24
REACTOME_TRANSCRIPTIONAL_REGULATION_BY_RUNX2	0.344348	0.721489	0.0919686	-0.290424	-1.0471	108
NABA_ECM_GLYCOPROTEINS	0.348354	0.721489	0.0911073	-0.278752	-1.04105	141
REACTOME_HIV_LIFE_CYCLE	0.346062	0.721489	0.111011	0.264023	1.03226	144
REACTOME_DOWNREGULATION_OF_ERBB2_SIGNALING	0.348214	0.721489	0.106323	0.380579	1.07248	26
REACTOME_TRANSPORT_OF_THE_SLBP_DEPENDANT_MATURE_MRNA	0.348018	0.721489	0.105521	0.352096	1.07264	35
REACTOME_FLT3_SIGNALING	0.347732	0.721489	0.104344	0.362658	1.08246	32
REACTOME_TRANSLESION_SYNTHESIS_BY_POLK	0.343949	0.721489	0.103958	0.422407	1.08849	17
BIOCARTA_AKAP95_PATHWAY	0.346939	0.721489	0.100991	0.487127	1.11477	10
WP_ULCERATIVE_COLITIS_SIGNALING	0.34898	0.722301	0.100633	0.484745	1.10932	10
REACTOME_SIGNALING_BY_FGFR4_IN_DISEASE	0.349515	0.722924	0.0975449	-0.482957	-1.0969	11
REACTOME_EXPORT_OF_VIRAL_RIBONUCLEOPROTEINS_FROM_NUCLEUS	0.349892	0.72322	0.103958	0.361585	1.07926	32
REACTOME_ADRENOCEPTORS	0.350515	0.723539	0.100991	0.566137	1.10661	6
REACTOME_BH3_ONLY_PROTEINS_ASSOCIATE_WITH_AND_INACTIVATE_ANTI_APOPTOTIC_BCL_2_MEMBERS	0.350427	0.723539	0.103197	0.510427	1.12033	9
REACTOME_MAPK3_ERK1_ACTIVATION	0.351562	0.723798	0.0975449	-0.502222	-1.10496	10
REACTOME_BIOTIN_TRANSPORT_AND_METABOLISM	0.351456	0.723798	0.0972151	-0.48276	-1.09646	11
REACTOME_FCERI_MEDIATED_CA_2_MOBILIZATION	0.351201	0.723798	0.0943564	-0.389678	-1.07296	24
REACTOME_RHO_GTPASES_ACTIVATE_PAKS	0.351579	0.723798	0.10208	0.393068	1.07558	21
BIOCARTA_SARS_PATHWAY	0.353965	0.72508	0.096563	-0.573307	-1.11803	6
BIOCARTA_PARKIN_PATHWAY	0.354286	0.72508	0.0956031	-0.555367	-1.11494	7
REACTOME_CREB_PHOSPHORYLATION	0.354286	0.72508	0.0956031	-0.554705	-1.11361	7
KEGG_TAURINE_AND_HYPOTAURINE_METABOLISM	0.354286	0.72508	0.0956031	-0.554266	-1.11273	7
REACTOME_RUNX2_REGULATES_CHONDROCYTE_MATURATION	0.353635	0.72508	0.0975449	-0.603566	-1.11238	5
WP_GENETIC_CAUSES_OF_PORTOSINUSOIDAL_VASCULAR_DISEASE	0.354317	0.72508	0.0922597	-0.379609	-1.05977	25
PID_HDAC_CLASSI_PATHWAY	0.35426	0.72508	0.105521	0.311465	1.05357	62
REACTOME_NOTCH4_ACTIVATION_AND_TRANSMISSION_OF_SIGNAL_TO_THE_NUCLEUS	0.353183	0.72508	0.100279	0.470748	1.10419	11
REACTOME_FLT3_SIGNALING_THROUGH_SRC_FAMILY_KINASES	0.352459	0.72508	0.100279	0.780921	1.14441	2
WP_VITAMIN_D_IN_INFLAMMATORY_DISEASES	0.355019	0.726007	0.0940503	-0.412604	-1.09089	20
REACTOME_G_PROTEIN_MEDIATED_EVENTS	0.35524	0.726007	0.0913924	-0.330633	-1.05138	49
REACTOME_CHEMOKINE_RECEPTORS_BIND_CHEMOKINES	0.356164	0.726453	0.0968878	-0.473324	-1.09973	12
REACTOME_INTERLEUKIN_7_SIGNALING	0.356089	0.726453	0.0934449	-0.411452	-1.08235	19
REACTOME_CELLULAR_RESPONSE_TO_STARVATION	0.355786	0.726453	0.0897105	-0.275806	-1.04021	150
REACTOME_MET_INTERACTS_WITH_TNS_PROTEINS	0.357285	0.727297	0.0978773	-0.651627	-1.11779	4
REACTOME_VASOPRESSIN_LIKE_RECEPTORS	0.357285	0.727297	0.0978773	-0.650603	-1.11603	4
REACTOME_PROTON_COUPLED_MONOCARBOXYLATE_TRANSPORT	0.356998	0.727297	0.0988903	0.596991	1.11071	5
REACTOME_SYNTHESIS_OF_WYBUTOSINE_AT_G37_OF_TRNA_PHE	0.357834	0.727454	0.0959207	-0.571104	-1.11373	6
REACTOME_COOPERATION_OF_PDCL_PHLP1_AND_TRIC_CCT_IN_G_PROTEIN_BETA_FOLDING	0.357759	0.727454	0.102449	0.353707	1.0647	33
REACTOME_MHC_CLASS_II_ANTIGEN_PRESENTATION	0.358261	0.727843	0.0897105	-0.288188	-1.03903	108
PID_WNT_NONCANONICAL_PATHWAY	0.359031	0.728927	0.103576	0.362477	1.0669	31
REACTOME_APOPTOTIC_CLEAVAGE_OF_CELL_ADHESION_PROTEINS	0.359316	0.729026	0.0946646	-0.526181	-1.09869	8
REACTOME_EPITHELIAL_MESENCHYMAL_TRANSITION_EMT_DURING_GASTRULATION	0.359768	0.729464	0.0956031	-0.570524	-1.1126	6
REACTOME_TNFR1_INDUCED_PROAPOPTOTIC_SIGNALING	0.360341	0.730146	0.101351	0.382866	1.05216	22
WP_CELLULAR_PROTEOSTASIS	0.360825	0.730646	0.0992333	0.559676	1.09398	6
WP_GAMMAGLUTAMYL_CYCLE_FOR_THE_BIOSYNTHESIS_AND_DEGRADATION_OF_GLUTATHIONE_INCLUDING_DISEASES	0.361702	0.730984	0.095288	-0.567942	-1.10757	6
WP_NICOTINE_EFFECT_ON_DOPAMINERGIC_NEURONS	0.361493	0.730984	0.0962406	-0.459381	-1.0867	13
REACTOME_LIPOPHAGY	0.361345	0.730984	0.100279	0.516498	1.10938	8
REACTOME_ASPARTATE_AND_ASPARAGINE_METABOLISM	0.363281	0.733695	0.0956031	-0.49639	-1.09213	10
WP_2Q112_COPY_NUMBER_VARIATION_SYNDROME	0.364312	0.734336	0.0925529	-0.3663	-1.06975	33
KEGG_OXIDATIVE_PHOSPHORYLATION	0.364121	0.734336	0.0899861	-0.288743	-1.03121	104
REACTOME_DISEASES_OF_SIGNAL_TRANSDUCTION_BY_GROWTH_FACTOR_RECEPTORS_AND_SECOND_MESSENGERS	0.364217	0.734336	0.0840746	-0.244939	-1.02423	390
REACTOME_NEF_MEDIATED_CD4_DOWN_REGULATION	0.365019	0.73472	0.0937465	-0.523978	-1.09408	8
REACTOME_KERATAN_SULFATE_KERATIN_METABOLISM	0.364991	0.73472	0.0925529	-0.37113	-1.06656	29
REACTOME_REGULATION_OF_TP53_ACTIVITY_THROUGH_METHYLATION	0.365217	0.73472	0.101714	0.40718	1.07388	19
REACTOME_ACTIVATION_OF_THE_PHOTOTRANSDUCTION_CASCADE	0.369352	0.735447	0.0949752	-0.596894	-1.10009	5
REACTOME_FGFR1C_LIGAND_BINDING_AND_ACTIVATION	0.369352	0.735447	0.0949752	-0.596282	-1.09896	5
REACTOME_BIOSYNTHESIS_OF_EPA_DERIVED_SPMS	0.367505	0.735447	0.0943564	-0.562783	-1.09751	6
BIOCARTA_LYMPHOCYTE_PATHWAY	0.369352	0.735447	0.0949752	-0.595389	-1.09731	5
BIOCARTA_MONOCYTE_PATHWAY	0.369352	0.735447	0.0949752	-0.595389	-1.09731	5
REACTOME_RETROGRADE_NEUROTROPHIN_SIGNALLING	0.367387	0.735447	0.095288	-0.454458	-1.07505	13
KEGG_PYRUVATE_METABOLISM	0.369888	0.735447	0.0916795	-0.36365	-1.06201	33
KEGG_NON_SMALL_CELL_LUNG_CANCER	0.370107	0.735447	0.0891647	-0.328126	-1.04947	51
KEGG_PANCREATIC_CANCER	0.369369	0.735447	0.0899861	-0.313506	-1.04659	67
REACTOME_NEURONAL_SYSTEM	0.366501	0.735447	0.0857844	-0.251674	-1.0246	304
REACTOME_PROTEIN_UBIQUITINATION	0.366516	0.735447	0.103958	0.303765	1.03034	63
REACTOME_RIPK1_MEDIATED_REGULATED_NECROSIS	0.367615	0.735447	0.101714	0.365475	1.04122	27
REACTOME_REGULATION_OF_INSULIN_SECRETION	0.368304	0.735447	0.102822	0.309665	1.04539	61
REACTOME_RMTS_METHYLATE_HISTONE_ARGININES	0.369892	0.735447	0.100279	0.360526	1.04799	29
REACTOME_ACTIVATION_OF_THE_PRE_REPLICATIVE_COMPLEX	0.367171	0.735447	0.100991	0.35484	1.05912	32
REACTOME_GLYCOGEN_STORAGE_DISEASES	0.36714	0.735447	0.0972151	0.441985	1.07754	13
WP_FTO_OBESITY_VARIANT_MECHANISM	0.369072	0.735447	0.0978773	0.552515	1.07998	6
REACTOME_CONDENSATION_OF_PROMETAPHASE_CHROMOSOMES	0.367556	0.735447	0.0978773	0.46456	1.08967	11
REACTOME_DEFECTIVE_GALNT3_CAUSES_HFTC	0.369658	0.735447	0.0999277	0.500318	1.09814	9
REACTOME_TNF_RECEPTOR_SUPERFAMILY_TNFSF_MEMBERS_MEDIATING_NON_CANONICAL_NF_KB_PATHWAY	0.371094	0.736934	0.0943564	-0.49056	-1.0793	10
WP_ARACHIDONATE_EPOXYGENASE_EPOXIDE_HYDROLASE	0.371373	0.737015	0.0937465	-0.557816	-1.08782	6
BIOCARTA_PLC_PATHWAY	0.372624	0.739021	0.0925529	-0.519688	-1.08513	8
REACTOME_LIPID_PARTICLE_ORGANIZATION	0.372951	0.739195	0.0968878	0.770838	1.12963	2
WP_OSTEOPONTIN_SIGNALING	0.373777	0.740357	0.0940503	-0.464354	-1.07889	12
REACTOME_ATF6_ATF6_ALPHA_ACTIVATES_CHAPERONES	0.375734	0.740616	0.0937465	-0.462804	-1.07529	12
REACTOME_CARDIAC_CONDUCTION	0.374781	0.740616	0.0875697	-0.293759	-1.03024	90
REACTOME_METABOLISM_OF_POLYAMINES	0.375458	0.740616	0.0899861	-0.31984	-1.02936	55
WP_MET_IN_TYPE_1_PAPILLARY_RENAL_CELL_CARCINOMA	0.375458	0.740616	0.0899861	-0.319477	-1.0282	55
KEGG_MAPK_SIGNALING_PATHWAY	0.375828	0.740616	0.0843144	-0.260873	-1.0272	219
REACTOME_INOSITOL_PHOSPHATE_METABOLISM	0.374718	0.740616	0.102449	0.325866	1.03967	45
REACTOME_ERBB2_ACTIVATES_PTK6_SIGNALING	0.37577	0.740616	0.096563	0.460554	1.08028	11
REACTOME_NEGATIVE_REGULATION_OF_FLT3	0.374745	0.740616	0.0962406	0.453228	1.08077	12
REACTOME_TGF_BETA_RECEPTOR_SIGNALING_IN_EMT_EPITHELIAL_TO_MESENCHYMAL_TRANSITION	0.376181	0.74084	0.0916795	-0.432796	-1.06728	15
WP_OSTEOCLAST_SIGNALING	0.376699	0.741386	0.0931455	-0.467902	-1.06271	11
REACTOME_NICOTINAMIDE_SALVAGING	0.377143	0.741786	0.0919686	-0.428545	-1.07395	16
WP_DRAVET_SYNDROME	0.377609	0.74223	0.0916795	-0.403132	-1.067	21
WP_NANOMATERIAL_INDUCED_APOPTOSIS	0.378531	0.743569	0.0911073	-0.416034	-1.06317	17
BIOCARTA_MCM_PATHWAY	0.378788	0.7436	0.0913924	-0.401268	-1.03859	18
REACTOME_REGULATION_OF_GENE_EXPRESSION_IN_EARLY_PANCREATIC_PRECURSOR_CELLS	0.379381	0.744292	0.0962406	0.54479	1.06488	6
WP_GASTRIC_CANCER_NETWORK_2	0.380645	0.746297	0.09855	0.358101	1.04094	29
KEGG_UBIQUITIN_MEDIATED_PROTEOLYSIS	0.381068	0.746651	0.10592	0.264236	1.0187	129
REACTOME_FGFR3B_LIGAND_BINDING_AND_ACTIVATION	0.382524	0.749029	0.0922597	-0.747728	-1.09114	2
REACTOME_TP53_REGULATES_TRANSCRIPTION_OF_CELL_CYCLE_GENES	0.382826	0.749146	0.0875697	-0.33175	-1.04364	47
REACTOME_OXIDATIVE_STRESS_INDUCED_SENESCENCE	0.383929	0.749914	0.100279	0.307213	1.03711	61
WP_S1P_RECEPTOR_SIGNAL_TRANSDUCTION	0.383948	0.749914	0.09855	0.378257	1.05563	24
WP_CANNABINOID_RECEPTOR_SIGNALING	0.383948	0.749914	0.09855	0.378302	1.05575	24
REACTOME_RHO_GTPASES_ACTIVATE_FORMINS	0.384248	0.749943	0.104344	0.265834	1.02821	132
REACTOME_RAF_ACTIVATION	0.384449	0.749943	0.0982123	0.349315	1.04263	32
REACTOME_GLUTATHIONE_CONJUGATION	0.385036	0.750614	0.0883594	-0.359737	-1.04859	31
REACTOME_PROCESSING_OF_SMDT1	0.385633	0.750829	0.0902635	-0.429476	-1.05909	15
REACTOME_TRNA_PROCESSING_IN_THE_MITOCHONDRION	0.385567	0.750829	0.095288	0.539509	1.05456	6
REACTOME_FATTY_ACIDS	0.386408	0.751389	0.0916795	-0.743744	-1.08532	2
BIOCARTA_PTC1_PATHWAY	0.386408	0.751389	0.0916795	-0.463188	-1.052	11
REACTOME_ADRENALINE_NORADRENALINE_INHIBITS_INSULIN_SECRETION	0.386752	0.751509	0.0972151	0.378085	1.05058	23
REACTOME_TRANSCRIPTION_OF_E2F_TARGETS_UNDER_NEGATIVE_CONTROL_BY_DREAM_COMPLEX	0.386957	0.751509	0.0982123	0.400606	1.05654	19
REACTOME_TRANSPORT_OF_CONNEXONS_TO_THE_PLASMA_MEMBRANE	0.387524	0.752137	0.0899861	-0.429169	-1.05833	15
REACTOME_SIGNALING_BY_MAPK_MUTANTS	0.388571	0.752142	0.0902635	-0.539412	-1.08291	7
REACTOME_NR1H2_NR1H3_REGULATE_GENE_EXPRESSION_TO_CONTROL_BILE_ACID_HOMEOSTASIS	0.388571	0.752142	0.0902635	-0.538137	-1.08035	7
WP_RIBOFLAVIN_AND_COQ_DISORDERS	0.390963	0.752142	0.0916795	-0.445156	-1.05305	13
BIOCARTA_VITCB_PATHWAY	0.390625	0.752142	0.0913924	-0.478513	-1.0528	10
REACTOME_INTRA_GOLGI_TRAFFIC	0.389381	0.752142	0.0860347	-0.341582	-1.04625	41
WP_IL1_SIGNALING_PATHWAY	0.392086	0.752142	0.08654	-0.324405	-1.0435	53
BIOCARTA_AT1R_PATHWAY	0.390826	0.752142	0.0878313	-0.367457	-1.04116	27
PID_FAK_PATHWAY	0.389397	0.752142	0.0878313	-0.318363	-1.04094	58
PID_LYSOPHOSPHOLIPID_PATHWAY	0.388087	0.752142	0.0873098	-0.314894	-1.04013	61
REACTOME_SCF_SKP2_MEDIATED_DEGRADATION_OF_P27_P21	0.389892	0.752142	0.0870516	-0.3156	-1.03108	57
KEGG_JAK_STAT_SIGNALING_PATHWAY	0.389474	0.752142	0.0855357	-0.292594	-1.02023	87
REACTOME_RHO_GTPASE_EFFECTORS	0.392157	0.752142	0.104733	0.244814	1.01857	241
PID_AJDISS_2PATHWAY	0.390519	0.752142	0.0999277	0.325729	1.03481	43
WP_TYPE_2_PAPILLARY_RENAL_CELL_CARCINOMA	0.387931	0.752142	0.0975449	0.344194	1.03607	33
PID_THROMBIN_PAR1_PATHWAY	0.391403	0.752142	0.0999277	0.332338	1.03828	40
REACTOME_PHASE_0_RAPID_DEPOLARISATION	0.391026	0.752142	0.096563	0.376422	1.04596	23
KEGG_BASAL_TRANSCRIPTION_FACTORS	0.39207	0.752142	0.0982123	0.35612	1.04819	31
BIOCARTA_MITOCHONDRIA_PATHWAY	0.390295	0.752142	0.0959207	0.398547	1.04913	18
REACTOME_LOSS_OF_MECP2_BINDING_ABILITY_TO_THE_NCOR_SMRT_COMPLEX	0.392034	0.752142	0.095288	0.521539	1.07552	7
REACTOME_SELENOAMINO_ACID_METABOLISM	0.39254	0.752409	0.0857844	-0.285867	-1.02094	104
REACTOME_NR1H2_NR1H3_REGULATE_GENE_EXPRESSION_LINKED_TO_TRIGLYCERIDE_LIPOLYSIS_IN_ADIPOSE	0.393214	0.753232	0.0922597	-0.638924	-1.096	4
REACTOME_FGFR1_LIGAND_BINDING_AND_ACTIVATION	0.39619	0.756105	0.0891647	-0.53349	-1.07102	7
BIOCARTA_NDKDYNAMIN_PATHWAY	0.39548	0.756105	0.0886261	-0.408233	-1.04323	17
KEGG_PORPHYRIN_AND_CHLOROPHYLL_METABOLISM	0.395131	0.756105	0.0883594	-0.381837	-1.03943	23
REACTOME_AGGREPHAGY	0.39539	0.756105	0.0852885	-0.342943	-1.03597	37
REACTOME_SIGNALING_BY_FGFR_IN_DISEASE	0.396429	0.756105	0.0855357	-0.323075	-1.02973	50
REACTOME_DNA_DOUBLE_STRAND_BREAK_RESPONSE	0.396396	0.756105	0.0988903	0.324691	1.03042	44
REACTOME_SYNTHESIS_OF_PYROPHOSPHATES_IN_THE_CYTOSOL	0.395918	0.756105	0.0931455	0.471012	1.07789	10
WP_DUAL_HIJACK_MODEL_OF_VIF_IN_HIV_INFECTION	0.397338	0.756905	0.0888945	-0.506633	-1.05787	8
BIOCARTA_CDC42RAC_PATHWAY	0.397338	0.756905	0.0888945	-0.506168	-1.0569	8
PID_INTEGRIN_CS_PATHWAY	0.39777	0.757259	0.0875697	-0.397618	-1.05127	20
REACTOME_CONSTITUTIVE_SIGNALING_BY_OVEREXPRESSED_ERBB2	0.398058	0.757341	0.0899861	-0.457844	-1.03987	11
BIOCARTA_ASBCELL_PATHWAY	0.40081	0.758503	0.0919686	-0.688916	-1.09448	3
BIOCARTA_BBCELL_PATHWAY	0.40081	0.758503	0.0919686	-0.688916	-1.09448	3
BIOCARTA_PELP1_PATHWAY	0.40668	0.758503	0.0894367	-0.583569	-1.07553	5
REACTOME_PHASE_4_RESTING_MEMBRANE_POTENTIAL	0.406367	0.758503	0.086795	-0.49503	-1.06275	9
REACTOME_ESTROGEN_STIMULATED_SIGNALING_THROUGH_PRKCZ	0.402321	0.758503	0.0891647	-0.544885	-1.0626	6
REACTOME_CYTOSOLIC_TRNA_AMINOACYLATION	0.404255	0.758503	0.0888945	-0.544408	-1.06167	6
REACTOME_TRANSPORT_AND_SYNTHESIS_OF_PAPS	0.40619	0.758503	0.0886261	-0.542611	-1.05817	6
REACTOME_RECYCLING_OF_EIF2_GDP	0.39924	0.758503	0.0886261	-0.50546	-1.05542	8
WP_BONE_MORPHOGENIC_PROTEIN_SIGNALING_AND_REGULATION	0.401174	0.758503	0.0899861	-0.4528	-1.05204	12
BIOCARTA_TNFR1_PATHWAY	0.399628	0.758503	0.0873098	-0.367062	-1.04594	28
WP_FIBRIN_COMPLEMENT_RECEPTOR_3_SIGNALING_PATHWAY	0.404806	0.758503	0.0862866	-0.359344	-1.04167	30
REACTOME_PROLONGED_ERK_ACTIVATION_EVENTS	0.404715	0.758503	0.0897105	-0.440198	-1.04132	13
REACTOME_TRANSPORT_OF_VITAMINS_NUCLEOSIDES_AND_RELATED_MOLECULES	0.401487	0.758503	0.0870516	-0.356126	-1.04004	33
WP_MFAP5_EFFECT_ON_PERMEABILITY_AND_MOTILITY_OF_ENDOTHELIAL_CELLS_VIA_CYTOSKELETON_REARRANGEMENT	0.403013	0.758503	0.0875697	-0.406743	-1.03942	17
REACTOME_PD_1_SIGNALING	0.40625	0.758503	0.0891647	-0.472386	-1.03932	10
WP_MAJOR_RECEPTORS_TARGETED_BY_EPINEPHRINE_AND_NOREPINEPHRINE	0.403846	0.758503	0.0886261	-0.431206	-1.03866	14
WP_2Q211_COPY_NUMBER_VARIATION_SYNDROME	0.40668	0.758503	0.0894367	-0.43861	-1.03756	13
REACTOME_PROLACTIN_RECEPTOR_SIGNALING	0.403883	0.758503	0.0891647	-0.456649	-1.03715	11
REACTOME_GLUTATHIONE_SYNTHESIS_AND_RECYCLING	0.403883	0.758503	0.0891647	-0.455744	-1.0351	11
WP_AMYOTROPHIC_LATERAL_SCLEROSIS_ALS	0.40625	0.758503	0.0857844	-0.350962	-1.03471	34
WP_PROTEOGLYCAN_BIOSYNTHESIS	0.40678	0.758503	0.0870516	-0.404583	-1.0339	17
BIOCARTA_HER2_PATHWAY	0.404175	0.758503	0.0878313	-0.390395	-1.03329	21
REACTOME_WNT_LIGAND_BIOGENESIS_AND_TRAFFICKING	0.40678	0.758503	0.0870516	-0.404304	-1.03319	17
KEGG_THYROID_CANCER	0.400722	0.758503	0.0855357	-0.364761	-1.0279	26
REACTOME_TRANSMISSION_ACROSS_CHEMICAL_SYNAPSES	0.402318	0.758503	0.0806388	-0.260481	-1.01621	202
REACTOME_TRANSCRIPTIONAL_REGULATION_OF_WHITE_ADIPOCYTE_DIFFERENTIATION	0.40636	0.758503	0.0835991	-0.29794	-1.01554	73
REACTOME_STIMULI_SENSING_CHANNELS	0.401408	0.758503	0.0840746	-0.294023	-1.0154	79
REACTOME_SIGNALING_BY_ERBB4	0.402715	0.758503	0.0982123	0.316142	1.02169	50
REACTOME_SIGNALING_BY_NOTCH3	0.401806	0.758503	0.0982123	0.31975	1.02276	47
REACTOME_NOTCH3_INTRACELLULAR_DOMAIN_REGULATES_TRANSCRIPTION	0.403846	0.758503	0.0946646	0.370819	1.03039	23
REACTOME_SHC1_EVENTS_IN_ERBB2_SIGNALING	0.403017	0.758503	0.095288	0.391257	1.0446	20
REACTOME_AMINO_ACID_CONJUGATION	0.403689	0.758503	0.0922597	0.754038	1.10501	2
REACTOME_CONJUGATION_OF_BENZOATE_WITH_GLYCINE	0.403689	0.758503	0.0922597	0.754038	1.10501	2
REACTOME_ACROSOME_REACTION_AND_SPERM_OOCYTE_MEMBRANE_BINDING	0.407767	0.758971	0.0886261	-0.735672	-1.07354	2
BIOCARTA_MELANOCYTE_PATHWAY	0.409524	0.758971	0.0873098	-0.529456	-1.06292	7
REACTOME_TRANSLATION_OF_SARS_COV_1_STRUCTURAL_PROTEINS	0.407821	0.758971	0.0862866	-0.36133	-1.03839	29
REACTOME_SIGNALING_BY_ERBB2_IN_CANCER	0.408503	0.758971	0.0857844	-0.375601	-1.0342	24
KEGG_REGULATION_OF_ACTIN_CYTOSKELETON	0.408859	0.758971	0.0813027	-0.267335	-1.02296	172
REACTOME_MUSCLE_CONTRACTION	0.409012	0.758971	0.0822055	-0.270547	-1.0149	146
KEGG_NOTCH_SIGNALING_PATHWAY	0.407658	0.758971	0.0972151	0.32168	1.01779	42
KEGG_FRUCTOSE_AND_MANNOSE_METABOLISM	0.409483	0.758971	0.0943564	0.358721	1.03054	28
WP_MATRIX_METALLOPROTEINASES	0.409283	0.758971	0.0931455	0.391745	1.03123	18
PID_INTEGRIN4_PATHWAY	0.408624	0.758971	0.0916795	0.447378	1.04937	11
REACTOME_REPRESSION_OF_WNT_TARGET_GENES	0.409736	0.758971	0.0908241	0.430456	1.04943	13
BIOCARTA_NEUTROPHIL_PATHWAY	0.411178	0.759886	0.0897105	-0.630541	-1.08162	4
REACTOME_APOPTOSIS	0.411215	0.759886	0.0988903	0.254264	1.0092	152
WP_HISTONE_MODIFICATIONS	0.411085	0.759886	0.0982123	0.335012	1.03201	39
WP_NOTCH_SIGNALING	0.411085	0.759886	0.0982123	0.335451	1.03336	39
WP_NANOPARTICLE_TRIGGERED_AUTOPHAGIC_CELL_DEATH	0.411514	0.759983	0.0934449	0.366748	1.00787	22
WP_BIOTIN_METABOLISM_INCLUDING_IMDS	0.411985	0.760398	0.0860347	-0.490633	-1.05331	9
BIOCARTA_MPR_PATHWAY	0.413502	0.762682	0.0925529	0.386051	1.01624	18
WP_NEURAL_CREST_CELL_MIGRATION_IN_CANCER	0.413717	0.762682	0.095288	0.334143	1.02144	36
REACTOME_RUNX3_REGULATES_NOTCH_SIGNALING	0.414538	0.76374	0.0883594	-0.434222	-1.02718	13
BIOCARTA_RAN_PATHWAY	0.418468	0.766593	0.0878313	-0.572781	-1.05565	5
REACTOME_DEFECTIVE_CHST14_CAUSES_EDS_MUSCULOCONTRACTURAL_TYPE	0.417795	0.766593	0.0870516	-0.538696	-1.05053	6
BIOCARTA_IGF1MTOR_PATHWAY	0.418819	0.766593	0.0843144	-0.391998	-1.03118	19
WP_PRION_DISEASE_PATHWAY	0.416514	0.766593	0.0843144	-0.362503	-1.02713	27
PID_P38_ALPHA_BETA_PATHWAY	0.418773	0.766593	0.0831291	-0.361802	-1.01956	26
WP_7Q1123_COPY_NUMBER_VARIATION_SYNDROME	0.416667	0.766593	0.0813027	-0.29105	-1.01452	85
WP_2Q37_COPY_NUMBER_VARIATION_SYNDROME	0.418278	0.766593	0.0817516	-0.285957	-1.01286	95
WP_EGFEGFR_SIGNALING_PATHWAY	0.417657	0.766593	0.0799859	-0.266334	-1.00938	157
REACTOME_SULFIDE_OXIDATION_TO_SULFATE	0.418557	0.766593	0.0905429	0.521662	1.01967	6
REACTOME_ENERGY_DEPENDENT_REGULATION_OF_MTOR_BY_LKB1_AMPK	0.418103	0.766593	0.0931455	0.356828	1.02511	28
REACTOME_ROLE_OF_SECOND_MESSENGERS_IN_NETRIN_1_SIGNALING	0.418067	0.766593	0.0916795	0.488269	1.04875	8
REACTOME_BLOOD_GROUP_SYSTEMS_BIOSYNTHESIS	0.41966	0.767167	0.0855357	-0.420533	-1.03704	15
REACTOME_HEDGEHOG_OFF_STATE	0.419725	0.767167	0.096563	0.270444	1.015	106
WP_INTERACTIONS_OF_NATURAL_KILLER_CELLS_IN_PANCREATIC_CANCER	0.419878	0.767167	0.0894367	0.424538	1.03501	13
WP_COMPLEMENT_ACTIVATION	0.420432	0.767311	0.0875697	-0.431911	-1.02172	13
REACTOME_STABILIZATION_OF_P53	0.420455	0.767311	0.0959207	0.312306	1.00951	51
REACTOME_TNFS_BIND_THEIR_PHYSIOLOGICAL_RECEPTORS	0.420744	0.767385	0.0873098	-0.442291	-1.02763	12
BIOCARTA_TOLL_PATHWAY	0.421348	0.7676	0.0847985	-0.375168	-1.02128	23
WP_GANGLIO_SPHINGOLIPID_METABOLISM	0.421359	0.7676	0.086795	-0.449523	-1.02097	11
BIOCARTA_NOS1_PATHWAY	0.421739	0.767839	0.0931455	0.392023	1.03391	19
SA_B_CELL_RECEPTOR_COMPLEXES	0.423221	0.768736	0.0845557	-0.374127	-1.01844	23
KEGG_AXON_GUIDANCE	0.423143	0.768736	0.0802023	-0.273695	-1.00422	122
BIOCARTA_CARM_ER_PATHWAY	0.423077	0.768736	0.0919686	0.366282	1.01779	23
REACTOME_SPERM_MOTILITY_AND_TAXES	0.423228	0.768736	0.0873098	0.676765	1.08834	3
WP_SOMATROPH_AXIS_GH_AND_ITS_RELATIONSHIP_TO_DIETARY_RESTRICTION_AND_AGING	0.423598	0.768954	0.0862866	-0.536166	-1.0456	6
BIOCARTA_CIRCADIAN_PATHWAY	0.423935	0.769114	0.0888945	0.565133	1.05144	5
REACTOME_RSK_ACTIVATION	0.424762	0.769142	0.0852885	-0.521689	-1.04733	7
REACTOME_DEFECTIVE_FACTOR_VIII_CAUSES_HEMOPHILIA_A	0.424742	0.769142	0.0897105	0.516708	1.00999	6
REACTOME_RHO_GTPASES_ACTIVATE_NADPH_OXIDASES	0.424947	0.769142	0.0911073	0.408204	1.02412	15
WP_TCA_CYCLE_IN_SENESCENCE	0.42449	0.769142	0.0891647	0.461092	1.05519	10
REACTOME_PI3K_EVENTS_IN_ERBB2_SIGNALING	0.425311	0.76935	0.0899861	0.405656	1.00664	14
REACTOME_DEFECTIVE_LFNG_CAUSES_SCDO3	0.425963	0.770078	0.0886261	0.562326	1.04622	5
REACTOME_SYNTHESIS_OF_12_EICOSATETRAENOIC_ACID_DERIVATIVES	0.427146	0.770957	0.0875697	-0.625299	-1.07263	4
KEGG_INSULIN_SIGNALING_PATHWAY	0.427208	0.770957	0.0978773	0.266501	1.01329	120
KEGG_CIRCADIAN_RHYTHM_MAMMAL	0.427699	0.770957	0.0886261	0.432017	1.03019	12
BIOCARTA_TERT_PATHWAY	0.427673	0.770957	0.0902635	0.502519	1.0363	7
REACTOME_REGULATION_OF_SIGNALING_BY_NODAL	0.427673	0.770957	0.0902635	0.503705	1.03875	7
REACTOME_GENERATION_OF_SECOND_MESSENGER_MOLECULES	0.428261	0.77152	0.0922597	0.388032	1.02338	19
REACTOME_TRANSPORT_OF_FATTY_ACIDS	0.429142	0.772608	0.0873098	-0.622238	-1.06737	4
REACTOME_POST_TRANSLATIONAL_MODIFICATION_SYNTHESIS_OF_GPI_ANCHORED_PROTEINS	0.429616	0.772608	0.0824344	-0.309205	-1.011	58
BIOCARTA_STATHMIN_PATHWAY	0.429461	0.772608	0.0894367	0.403607	1.00156	14
REACTOME_SARS_COV_2_INFECTION	0.43	0.772633	0.0774768	-0.25176	-1.00944	266
REACTOME_TELOMERE_C_STRAND_LAGGING_STRAND_SYNTHESIS	0.430131	0.772633	0.0922597	0.331208	1.00381	34
REACTOME_STAT5_ACTIVATION_DOWNSTREAM_OF_FLT3_ITD_MUTANTS	0.430712	0.773226	0.0835991	-0.479407	-1.02921	9
REACTOME_SIGNALING_BY_FGFR1	0.432143	0.773726	0.0808589	-0.335432	-1.02149	40
PID_MTOR_4PATHWAY	0.432432	0.773726	0.0813027	-0.302622	-1.01025	67
WP_CELL_CYCLE	0.431973	0.773726	0.0782955	-0.274761	-1.00403	114
REACTOME_TRIGLYCERIDE_METABOLISM	0.431655	0.773726	0.0813027	-0.359619	-1.00396	25
REACTOME_RND1_GTPASE_CYCLE	0.432494	0.773726	0.0946646	0.322671	1.01363	41
REACTOME_TAK1_DEPENDENT_IKK_AND_NF_KAPPA_B_ACTIVATION	0.432432	0.773726	0.0937465	0.332298	1.02433	38
REACTOME_EPH_EPHRIN_SIGNALING	0.434028	0.775121	0.0791317	-0.287271	-1.00798	89
WP_INFLAMMATORY_RESPONSE_PATHWAY	0.433712	0.775121	0.0838361	-0.387783	-1.00369	18
SIG_REGULATION_OF_THE_ACTIN_CYTOSKELETON_BY_RHO_GTPASES	0.433839	0.775121	0.0913924	0.345461	1.01079	30
PID_NFAT_3PATHWAY	0.435572	0.77625	0.0813027	-0.318983	-1.01868	52
WP_HIPPO_SIGNALING_REGULATION_PATHWAYS	0.43554	0.77625	0.0791317	-0.289153	-1.00861	86
KEGG_VIRAL_MYOCARDITIS	0.435666	0.77625	0.0934449	0.313734	1.00352	47
REACTOME_MATURATION_OF_SARS_COV_2_NUCLEOPROTEIN	0.435518	0.77625	0.0897105	0.405387	1.01705	15
WP_SECRETION_OF_HYDROCHLORIC_ACID_IN_PARIETAL_CELLS	0.436893	0.776435	0.0847985	-0.722519	-1.05435	2
WP_FATTY_ACID_TRANSPORTERS	0.4375	0.776435	0.0850427	-0.460814	-1.01386	10
PID_VEGFR1_2_PATHWAY	0.43672	0.776435	0.0802023	-0.301118	-1.00849	68
REACTOME_GAP_JUNCTION_TRAFFICKING_AND_REGULATION	0.436364	0.776435	0.0813027	-0.336544	-1.0067	36
REACTOME_FRS_MEDIATED_FGFR4_SIGNALING	0.436149	0.776435	0.0855357	-0.425475	-1.00649	13
REACTOME_THE_CITRIC_ACID_TCA_CYCLE_AND_RESPIRATORY_ELECTRON_TRANSPORT	0.437931	0.776435	0.0782955	-0.26574	-1.00385	155
PID_CIRCADIAN_PATHWAY	0.437759	0.776435	0.0883594	0.401708	0.996846	14
WP_HEART_DEVELOPMENT	0.437071	0.776435	0.0940503	0.321066	1.00859	41
WP_THIAMINE_METABOLIC_PATHWAYS	0.438034	0.776435	0.0899861	0.474295	1.04102	9
PID_LIS1_PATHWAY	0.438532	0.776487	0.0815265	-0.357929	-1.01417	27
WP_FACTORS_AND_PATHWAYS_AFFECTING_INSULINLIKE_GROWTH_FACTOR_IGF1AKT_SIGNALING	0.438662	0.776487	0.0822055	-0.346118	-1.01081	33
REACTOME_PLATELET_CALCIUM_HOMEOSTASIS	0.438819	0.776487	0.0891647	0.377989	0.995014	18
REACTOME_TRNA_PROCESSING	0.440367	0.778781	0.0937465	0.267557	1.00417	106
REACTOME_UBIQUINOL_BIOSYNTHESIS	0.441065	0.779122	0.0831291	-0.489526	-1.02215	8
REACTOME_GPVI_MEDIATED_ACTIVATION_CASCADE	0.44086	0.779122	0.0899861	0.344273	1.00074	29
WP_SARSCOV2_AND_COVID19_PATHWAY	0.441948	0.779789	0.0822055	-0.476124	-1.02216	9
REACTOME_STRIATED_MUSCLE_CONTRACTION	0.441774	0.779789	0.0815265	-0.364384	-1.00332	24
REACTOME_TYROSINE_CATABOLISM	0.44332	0.780363	0.0862866	-0.668605	-1.06221	3
WP_TYROSINE_METABOLISM_AND_RELATED_DISORDERS	0.44332	0.780363	0.0862866	-0.668605	-1.06221	3
WP_SCFA_AND_SKELETAL_MUSCLE_SUBSTRATE_METABOLISM	0.442718	0.780363	0.0840746	-0.721034	-1.05218	2
PID_VEGFR1_PATHWAY	0.444043	0.780363	0.0799859	-0.355283	-1.0012	26
REACTOME_OPIOID_SIGNALLING	0.443662	0.780363	0.0787114	-0.287849	-0.994081	79
REACTOME_DUAL_INCISION_IN_TC_NER	0.443936	0.780363	0.0931455	0.289935	0.989019	65
BIOCARTA_PITX2_PATHWAY	0.443975	0.780363	0.0886261	0.401111	1.00632	15
PID_INSULIN_GLUCOSE_PATHWAY	0.444653	0.780545	0.0819779	-0.369447	-0.996404	22
REACTOME_AZATHIOPRINE_ADME	0.444653	0.780545	0.0819779	-0.369141	-0.995578	22
REACTOME_SIGNALING_BY_MET	0.446208	0.782385	0.0785029	-0.294145	-1.00669	75
REACTOME_SYNTHESIS_SECRETION_AND_INACTIVATION_OF_GLUCAGON_LIKE_PEPTIDE_1_GLP_1	0.445972	0.782385	0.0843144	-0.421001	-0.995908	13
WP_MITOCHONDRIAL_COMPLEX_II_ASSEMBLY	0.446768	0.782478	0.0824344	-0.487988	-1.01894	8
BIOCARTA_PLK3_PATHWAY	0.446768	0.782478	0.0824344	-0.487952	-1.01886	8
WP_SEROTONIN_TRANSPORTER_ACTIVITY	0.447566	0.782998	0.0815265	-0.47378	-1.01713	9
WP_HEREDITARY_LEIOMYOMATOSIS_AND_RENAL_CELL_CARCINOMA_PATHWAY	0.447826	0.782998	0.0897105	0.38012	1.00251	19
REACTOME_SUMOYLATION_OF_IMMUNE_RESPONSE_PROTEINS	0.447639	0.782998	0.08654	0.433198	1.01611	11
REACTOME_ANCHORING_FIBRIL_FORMATION	0.448276	0.78334	0.0857844	0.415628	1.01328	13
WP_FOCAL_ADHESION	0.448739	0.783707	0.0756946	-0.260985	-1.0023	176
REACTOME_ENDOSOMAL_VACUOLAR_PATHWAY	0.449438	0.784483	0.0813027	-0.47221	-1.01376	9
BIOCARTA_HIVNEF_PATHWAY	0.450091	0.784747	0.0795565	-0.315607	-1.0079	52
REACTOME_REGULATION_OF_IFNA_IFNB_SIGNALING	0.450098	0.784747	0.0835991	-0.429407	-0.997693	12
WP_NICOTINE_EFFECT_ON_CHROMAFFIN_CELLS	0.450485	0.784785	0.0831291	-0.716804	-1.04601	2
PID_IL2_1PATHWAY	0.450628	0.784785	0.078921	-0.318351	-1.00571	48
WP_PEROXIREDOXIN_2_INDUCED_OVARIAN_FAILURE	0.451429	0.785735	0.0819779	-0.508886	-1.02163	7
REACTOME_METALLOPROTEASE_DUBS	0.45203	0.786338	0.0802023	-0.381687	-1.00405	19
BIOCARTA_S1P_PATHWAY	0.452471	0.786444	0.0817516	-0.485498	-1.01374	8
WP_NAD_METABOLISM	0.453686	0.786444	0.0813027	-0.410564	-1.01245	15
REACTOME_NEUROTRANSMITTER_CLEARANCE	0.453184	0.786444	0.0808589	-0.469247	-1.0074	9
WP_MITOCHONDRIAL_GENE_EXPRESSION	0.453875	0.786444	0.0799859	-0.381293	-1.00301	19
WP_BASE_EXCISION_REPAIR	0.453744	0.786444	0.0897105	0.342474	1.00802	31
REACTOME_FERTILIZATION	0.453782	0.786444	0.0870516	0.477669	1.02598	8
REACTOME_PYRIMIDINE_SALVAGE	0.452991	0.786444	0.0880945	0.470439	1.03256	9
PID_TGFBR_PATHWAY	0.454545	0.786723	0.0913924	0.306085	0.989403	51
REACTOME_INTERLEUKIN_1_FAMILY_SIGNALING	0.454327	0.786723	0.0946646	0.260959	0.999783	123
REACTOME_ADENYLATE_CYCLASE_ACTIVATING_PATHWAY	0.455078	0.786804	0.0828962	-0.455572	-1.00232	10
REACTOME_REGULATION_OF_GLYCOLYSIS_BY_FRUCTOSE_2_6_BISPHOSPHATE_METABOLISM	0.455102	0.786804	0.0852885	0.44765	1.02443	10
KEGG_LONG_TERM_POTENTIATION	0.455947	0.787824	0.0894367	0.298545	1.00348	59
REACTOME_ERK_MAPK_TARGETS	0.457786	0.789439	0.08042	-0.365102	-0.984685	22
WP_GASTRIC_CANCER_NETWORK_1	0.457265	0.789439	0.0875697	0.353069	0.981073	23
WP_PATHWAYS_AFFECTED_IN_ADENOID_CYSTIC_CARCINOMA	0.457589	0.789439	0.0899861	0.296702	1.00163	61
BIOCARTA_MYOSIN_PATHWAY	0.457906	0.789439	0.0852885	0.428962	1.00618	11
KEGG_LEUKOCYTE_TRANSENDOTHELIAL_MIGRATION	0.458554	0.789992	0.0770737	-0.281673	-0.993186	93
REACTOME_REGULATION_OF_EXPRESSION_OF_SLITS_AND_ROBOS	0.458738	0.789992	0.0946646	0.251751	0.999212	160
REACTOME_SYNTHESIS_OF_PG	0.459119	0.790208	0.0862866	0.490464	1.01144	7
BIOCARTA_PEPI_PATHWAY	0.460922	0.791156	0.0835991	-0.758829	-1.02117	1
BIOCARTA_ALTERNATIVE_PATHWAY	0.460348	0.791156	0.0817516	-0.519938	-1.01395	6
KEGG_AUTOIMMUNE_THYROID_DISEASE	0.460952	0.791156	0.0808589	-0.395922	-0.992191	16
BIOCARTA_STRESS_PATHWAY	0.460674	0.791156	0.0799859	-0.360926	-0.982505	23
REACTOME_RAF_INDEPENDENT_MAPK1_3_ACTIVATION	0.460674	0.791156	0.0799859	-0.360856	-0.982315	23
BIOCARTA_NKCELLS_PATHWAY	0.461248	0.791223	0.08042	-0.408409	-1.00714	15
REACTOME_GDP_FUCOSE_BIOSYNTHESIS	0.463074	0.791428	0.0831291	-0.608407	-1.04365	4
WP_ESTRADIOL_REGULATION_IN_PORTOSINUSOIDAL_VASCULAR_DISEASE	0.463563	0.791428	0.0838361	-0.64953	-1.0319	3
REACTOME_FGFR3_LIGAND_BINDING_AND_ACTIVATION	0.463654	0.791428	0.0822055	-0.55458	-1.0221	5
REACTOME_REGULATION_OF_RUNX1_EXPRESSION_AND_ACTIVITY	0.462845	0.791428	0.08654	0.379762	0.978603	17
REACTOME_ACTIVATION_OF_NMDA_RECEPTORS_AND_POSTSYNAPTIC_EVENTS	0.463134	0.791428	0.0911073	0.28013	0.993333	79
REACTOME_MISCELLANEOUS_TRANSPORT_AND_BINDING_EVENTS	0.463362	0.791428	0.0873098	0.373344	0.996777	20
REACTOME_ASYMMETRIC_LOCALIZATION_OF_PCP_PROTEINS	0.462555	0.791428	0.0886261	0.297909	1.00134	59
REACTOME_SEMAPHORIN_INTERACTIONS	0.462222	0.791428	0.0891647	0.299217	1.00635	60
BIOCARTA_PLCE_PATHWAY	0.463675	0.791428	0.086795	0.463896	1.0182	9
BIOCARTA_CXCR4_PATHWAY	0.464015	0.79157	0.0802023	-0.381249	-0.986776	18
WP_ESTROGEN_RECEPTOR_PATHWAY	0.464419	0.791822	0.0795565	-0.460443	-0.988497	9
WP_ALLOGRAFT_REJECTION	0.465487	0.793204	0.0764767	-0.326092	-0.998808	41
REACTOME_SIGNALING_BY_BRAF_AND_RAF1_FUSIONS	0.466071	0.793344	0.0768737	-0.299909	-0.99941	63
PID_P53_REGULATION_PATHWAY	0.466083	0.793344	0.0878313	0.298976	0.997711	56
PID_EPHA2_FWD_PATHWAY	0.468635	0.795798	0.0782955	-0.376517	-0.990451	19
WP_RAS_SIGNALING	0.469072	0.795798	0.0745501	-0.261459	-0.988592	156
REACTOME_CHAPERONE_MEDIATED_AUTOPHAGY	0.468401	0.795798	0.0787114	-0.373499	-0.987498	20
WP_ALPHA_6_BETA_4_SIGNALING_PATHWAY	0.468401	0.795798	0.0787114	-0.337669	-0.986137	33
REACTOME_N_GLYCAN_ANTENNAE_ELONGATION	0.46888	0.795798	0.0845557	0.395342	0.981049	14
REACTOME_INTERLEUKIN_2_SIGNALING	0.468487	0.795798	0.0852885	0.469597	1.00864	8
REACTOME_TOLL_LIKE_RECEPTOR_CASCADES	0.469697	0.795983	0.0734381	-0.264622	-0.990387	136
REACTOME_SUPPRESSION_OF_PHAGOSOMAL_MATURATION	0.469548	0.795983	0.0815265	-0.410696	-0.971532	13
WP_OVERVIEW_OF_NANOPARTICLE_EFFECTS	0.470699	0.79637	0.0793435	-0.40421	-0.996785	15
KEGG_DRUG_METABOLISM_OTHER_ENZYMES	0.47026	0.79637	0.0785029	-0.348879	-0.994124	28
REACTOME_HEME_SIGNALING	0.470483	0.79637	0.0764767	-0.32342	-0.993474	43
REACTOME_MAPK_FAMILY_SIGNALING_CASCADES	0.471074	0.796567	0.0723571	-0.245934	-0.994255	277
REACTOME_DNA_DAMAGE_REVERSAL	0.471483	0.796822	0.0795565	-0.47524	-0.992318	8
REACTOME_ESTROGEN_DEPENDENT_GENE_EXPRESSION	0.471831	0.796973	0.0911073	0.275878	0.98682	85
WP_NODLIKE_RECEPTOR_NLR_SIGNALING_PATHWAY	0.472222	0.797198	0.0857844	0.458649	1.00668	9
BIOCARTA_MAPK_PATHWAY	0.472759	0.797243	0.0753094	-0.283245	-0.981622	80
WP_IL1_AND_MEGAKARYOCYTES_IN_OBESITY	0.473573	0.797243	0.0850427	0.387481	0.972128	15
KEGG_HYPERTROPHIC_CARDIOMYOPATHY_HCM	0.473684	0.797243	0.0894367	0.285555	0.974079	65
WP_GLYCOLYSIS_AND_GLUCONEOGENESIS	0.473799	0.797243	0.086795	0.322022	0.975968	34
REACTOME_INTERACTION_BETWEEN_L1_AND_ANKYRINS	0.472885	0.797243	0.08654	0.350598	0.978435	24
REACTOME_FORMATION_OF_TC_NER_PRE_INCISION_COMPLEX	0.473094	0.797243	0.0883594	0.302386	0.992474	53
REACTOME_PURINE_CATABOLISM	0.47448	0.797504	0.078921	-0.40334	-0.994638	15
KEGG_OOCYTE_MEIOSIS	0.474729	0.797504	0.0764767	-0.279059	-0.985891	97
REACTOME_RESPONSE_OF_MTB_TO_PHAGOCYTOSIS	0.474672	0.797504	0.0785029	-0.360185	-0.971422	22
REACTOME_ACTIVATED_NOTCH1_TRANSMITS_SIGNAL_TO_THE_NUCLEUS	0.475269	0.797976	0.0857844	0.336568	0.978343	29
REACTOME_GLUCOCORTICOID_BIOSYNTHESIS	0.475709	0.79806	0.0824344	-0.643768	-1.02275	3
KEGG_CITRATE_CYCLE_TCA_CYCLE	0.475836	0.79806	0.077884	-0.347511	-0.990226	28
BIOCARTA_HIF_PATHWAY	0.476371	0.798437	0.0787114	-0.400894	-0.988608	15
REACTOME_TP53_REGULATES_TRANSCRIPTION_OF_SEVERAL_ADDITIONAL_CELL_DEATH_GENES_WHOSE_SPECIFIC_ROLES_IN_P53_DEPENDENT_APOPTOSIS_REMAIN_UNCERTAIN	0.476578	0.798437	0.0826646	0.415511	0.99083	12
KEGG_NEUROTROPHIN_SIGNALING_PATHWAY	0.478185	0.798483	0.0743625	-0.269914	-0.983659	118
KEGG_CELL_CYCLE	0.478185	0.798483	0.0743625	-0.269236	-0.981189	118
REACTOME_SYNTHESIS_OF_GLYCOSYLPHOSPHATIDYLINOSITOL_GPI	0.478343	0.798483	0.0782955	-0.381371	-0.974587	17
WP_T_CELL_MODULATION_IN_PANCREATIC_CANCER	0.478417	0.798483	0.0758887	-0.348531	-0.973006	25
WP_KALLMANN_SYNDROME	0.477801	0.798483	0.0845557	0.386792	0.970399	15
WP_P38_MAPK_SIGNALING_PATHWAY	0.478166	0.798483	0.0862866	0.320905	0.972581	34
REACTOME_SARS_COV_2_MODULATES_HOST_TRANSLATION_MACHINERY	0.47836	0.798483	0.0886261	0.308221	0.992217	49
REACTOME_MITOCHONDRIAL_UNCOUPLING	0.479042	0.798662	0.0813027	-0.601723	-1.03218	4
REACTOME_TANDEM_PORE_DOMAIN_POTASSIUM_CHANNELS	0.479042	0.798662	0.0813027	0.583719	1.01305	4
REACTOME_RUNX3_REGULATES_CDKN1A_TRANSCRIPTION	0.479691	0.799312	0.0795565	-0.512407	-0.999264	6
KEGG_NOD_LIKE_RECEPTOR_SIGNALING_PATHWAY	0.480549	0.799879	0.0886261	0.313278	0.984126	41
SIG_BCR_SIGNALING_PATHWAY	0.48037	0.799879	0.0891647	0.324473	0.999544	39
WP_MAPK_SIGNALING_PATHWAY	0.481728	0.800976	0.0714786	-0.252476	-0.985916	204
REACTOME_MYOGENESIS	0.481562	0.800976	0.0855357	0.34491	0.962564	24
REACTOME_RHOU_GTPASE_CYCLE	0.482679	0.802126	0.0888945	0.324128	0.998481	39
PID_INSULIN_PATHWAY	0.483871	0.803674	0.0751182	-0.321577	-0.98432	42
WP_MAP3K1_ROLE_IN_PROMOTING_AND_BLOCKING_GONADAL_DETERMINATION	0.484615	0.804477	0.0787114	-0.405403	-0.976507	14
REACTOME_ACTIVATION_OF_RAC1_DOWNSTREAM_OF_NMDARS	0.485714	0.805525	0.0780892	-0.493008	-0.989751	7
REACTOME_FORMATION_OF_TUBULIN_FOLDING_INTERMEDIATES_BY_CCT_TRIC	0.485769	0.805525	0.077884	-0.367494	-0.972675	21
REACTOME_AMINO_ACIDS_REGULATE_MTORC1	0.486388	0.805935	0.0755015	-0.308394	-0.984863	52
REACTOME_AKT_PHOSPHORYLATES_TARGETS_IN_THE_CYTOSOL	0.486538	0.805935	0.0785029	-0.404224	-0.973669	14
REACTOME_DOWNSTREAM_SIGNALING_OF_ACTIVATED_FGFR1	0.487805	0.807167	0.0770737	-0.357725	-0.964788	22
REACTOME_DEGRADATION_OF_DVL	0.487805	0.807167	0.0860347	0.299638	0.980572	52
WP_HFE_EFFECT_ON_HEPCIDIN_PRODUCTION	0.488844	0.808452	0.0810802	0.530131	0.986321	5
REACTOME_DISSOLUTION_OF_FIBRIN_CLOT	0.489237	0.808669	0.0791317	-0.41928	-0.974163	12
REACTOME_SYNTHESIS_OF_IP3_AND_IP4_IN_THE_CYTOSOL	0.490239	0.809891	0.0845557	0.340953	0.95152	24
KEGG_ACUTE_MYELOID_LEUKEMIA	0.491007	0.810264	0.0745501	-0.305909	-0.984012	53
REACTOME_ACYL_CHAIN_REMODELLING_OF_PG	0.491262	0.810264	0.0785029	-0.429244	-0.97491	11
REACTOME_RESPONSE_OF_EIF2AK4_GCN2_TO_AMINO_ACID_DEFICIENCY	0.491833	0.810264	0.0749279	-0.276054	-0.974695	98
REACTOME_ASSOCIATION_OF_TRIC_CCT_WITH_TARGET_PROTEINS_DURING_BIOSYNTHESIS	0.490876	0.810264	0.0753094	-0.32747	-0.972822	35
REACTOME_STAT3_NUCLEAR_EVENTS_DOWNSTREAM_OF_ALK_SIGNALING	0.492188	0.810264	0.0787114	-0.440653	-0.969498	10
REACTOME_NR1H3_NR1H2_REGULATE_GENE_EXPRESSION_LINKED_TO_CHOLESTEROL_TRANSPORT_AND_EFFLUX	0.492565	0.810264	0.0760837	-0.331355	-0.967697	33
BIOCARTA_AKAP13_PATHWAY	0.492188	0.810264	0.0787114	-0.439361	-0.966655	10
REACTOME_INTERLEUKIN_27_SIGNALING	0.492509	0.810264	0.0764767	-0.449349	-0.964681	9
REACTOME_RESPIRATORY_ELECTRON_TRANSPORT_ATP_SYNTHESIS_BY_CHEMIOSMOTIC_COUPLING_AND_HEAT_PRODUCTION_BY_UNCOUPLING_PROTEINS	0.493913	0.811616	0.0725352	-0.270506	-0.977873	109
KEGG_PROGESTERONE_MEDIATED_OOCYTE_MATURATION	0.49387	0.811616	0.0728939	-0.282116	-0.97345	78
REACTOME_RAC3_GTPASE_CYCLE	0.495682	0.81409	0.0720033	-0.282685	-0.98234	83
WP_CILIARY_LANDSCAPE	0.496278	0.814635	0.0913924	0.241053	0.986105	203
WP_INTERACTIONS_BETWEEN_LOXL4_AND_OXIDATIVE_STRESS_PATHWAY	0.497175	0.814807	0.0762797	-0.377187	-0.963894	17
BIOCARTA_SPRY_PATHWAY	0.497175	0.814807	0.0762797	-0.376644	-0.962507	17
REACTOME_RUNX3_REGULATES_BCL2L11_BIM_TRANSCRIPTION	0.497006	0.814807	0.0793435	0.575749	0.999215	4
PID_PS1_PATHWAY	0.5	0.818134	0.0732559	-0.320438	-0.975831	40
REACTOME_NUCLEAR_IMPORT_OF_REV_PROTEIN	0.5	0.818134	0.0831291	0.324428	0.97657	33
BIOCARTA_BOTULIN_PATHWAY	0.5	0.818134	0.08042	0.700808	1.027	2
REACTOME_ION_TRANSPORT_BY_P_TYPE_ATPASES	0.501792	0.81979	0.0732559	-0.317674	-0.972373	42
BIOCARTA_LAIR_PATHWAY	0.501953	0.81979	0.0776799	-0.435843	-0.958916	10
WP_CELLS_AND_MOLECULES_INVOLVED_IN_LOCAL_ACUTE_INFLAMMATORY_RESPONSE	0.501953	0.81979	0.0776799	-0.435843	-0.958916	10
REACTOME_TRAFFICKING_OF_GLUR2_CONTAINING_AMPA_RECEPTORS	0.502075	0.81979	0.0808589	0.385017	0.955427	14
BIOCARTA_MITR_PATHWAY	0.502994	0.819989	0.0787114	-0.59185	-1.01525	4
BIOCARTA_BLYMPHOCYTE_PATHWAY	0.502994	0.819989	0.0787114	-0.59165	-1.0149	4
WP_MAMMARY_GLAND_DEVELOPMENT_PATHWAY_PREGNANCY_AND_LACTATION_STAGE_3_OF_4	0.502752	0.819989	0.0743625	-0.342052	-0.969182	27
PID_ERBB2_ERBB3_PATHWAY	0.504472	0.821531	0.0728939	-0.317196	-0.974355	43
BIOCARTA_RAC1_PATHWAY	0.504219	0.821531	0.0815265	0.363352	0.956485	18
REACTOME_HYALURONAN_BIOSYNTHESIS_AND_EXPORT	0.508982	0.822402	0.0780892	-0.589659	-1.01149	4
REACTOME_SIGNALING_BY_EGFR	0.508929	0.822402	0.0723571	-0.312794	-0.981776	46
WP_TGFBETA_SIGNALING_PATHWAY	0.509338	0.822402	0.0697793	-0.263978	-0.975659	126
REACTOME_LATE_SARS_COV_2_INFECTION_EVENTS	0.509804	0.822402	0.0721798	-0.291016	-0.974656	68
BIOCARTA_BIOPEPTIDES_PATHWAY	0.509294	0.822402	0.0743625	-0.340126	-0.969181	28
PID_HES_HEY_PATHWAY	0.507168	0.822402	0.0727141	-0.316236	-0.967971	42
PID_PI3KCI_AKT_PATHWAY	0.509191	0.822402	0.0738053	-0.32804	-0.967134	34
BIOCARTA_EPONFKB_PATHWAY	0.509766	0.822402	0.0768737	-0.434169	-0.955234	10
WP_AIRWAY_SMOOTH_MUSCLE_CELL_CONTRACTION	0.507099	0.822402	0.0791317	0.39463	0.962091	13
PID_THROMBIN_PAR4_PATHWAY	0.507099	0.822402	0.0791317	0.395725	0.96476	13
WP_NETRINUNC5B_SIGNALING_PATHWAY	0.506757	0.822402	0.0847985	0.305966	0.970993	44
WP_CYTOPLASMIC_RIBOSOMAL_PROTEINS	0.507009	0.822402	0.086795	0.271677	0.973883	86
WP_INITIATION_OF_TRANSCRIPTION_AND_TRANSLATION_ELONGATION_AT_THE_HIV1_LTR	0.508811	0.822402	0.0833634	0.331287	0.975097	31
BIOCARTA_RANBP2_PATHWAY	0.507187	0.822402	0.0797706	0.416168	0.976166	11
WP_GLUCOSE_METABOLISM_IN_TRIPLENEGATIVE_BREAST_CANCER_CELLS	0.508403	0.822402	0.0808589	0.456546	0.980609	8
BIOCARTA_CPSF_PATHWAY	0.508163	0.822402	0.0793435	0.42974	0.983442	10
BIOCARTA_AGPCR_PATHWAY	0.508163	0.822402	0.0793435	0.431606	0.987712	10
REACTOME_XENOBIOTICS	0.506122	0.822402	0.0795565	0.432515	0.989793	10
REACTOME_ACTIVATION_OF_TRKA_RECEPTORS	0.510978	0.823005	0.077884	-0.58812	-1.00885	4
KEGG_VASOPRESSIN_REGULATED_WATER_REABSORPTION	0.510714	0.823005	0.0721798	-0.317808	-0.96782	40
WP_HOSTPATHOGEN_INTERACTION_OF_HUMAN_CORONAVIRUSES_AUTOPHAGY	0.51087	0.823005	0.0824344	0.362744	0.956687	19
REACTOME_RUNX1_REGULATES_TRANSCRIPTION_OF_GENES_INVOLVED_IN_WNT_SIGNALING	0.512974	0.823551	0.0776799	-0.585151	-1.00376	4
WP_NEOVASCULARISATION_PROCESSES	0.512727	0.823551	0.0728939	-0.322983	-0.966141	36
REACTOME_SARS_COV_1_MODULATES_HOST_TRANSLATION_MACHINERY	0.512774	0.823551	0.0730744	-0.324142	-0.962938	35
REACTOME_TFAP2A_ACTS_AS_A_TRANSCRIPTIONAL_REPRESSOR_DURING_RETINOIC_ACID_INDUCED_CELL_DIFFERENTIATION	0.513185	0.823551	0.0785029	0.515997	0.960023	5
REACTOME_POSITIVE_EPIGENETIC_REGULATION_OF_RRNA_EXPRESSION	0.512415	0.823551	0.0843144	0.302951	0.962442	43
REACTOME_FORMATION_OF_THE_EARLY_ELONGATION_COMPLEX	0.512931	0.823551	0.0817516	0.322281	0.970108	33
BIOCARTA_EIF2_PATHWAY	0.512245	0.823551	0.078921	0.42654	0.976118	10
REACTOME_POST_CHAPERONIN_TUBULIN_FOLDING_PATHWAY	0.514124	0.824201	0.0745501	-0.371327	-0.948919	17
REACTOME_SIGNALING_BY_TGF_BETA_RECEPTOR_COMPLEX	0.513889	0.824201	0.0855357	0.265557	0.971249	91
KEGG_PARKINSONS_DISEASE	0.515098	0.824661	0.0714786	-0.271268	-0.968798	104
WP_ACETYLCHOLINE_SYNTHESIS	0.515213	0.824661	0.0782955	0.515634	0.959349	5
REACTOME_ELEVATION_OF_CYTOSOLIC_CA2_LEVELS	0.514957	0.824661	0.0810802	0.445077	0.976891	9
REACTOME_ACETYLCHOLINE_INHIBITS_CONTRACTION_OF_OUTER_HAIR_CELLS	0.516194	0.825124	0.0780892	-0.629529	-1.00013	3
NABA_ECM_AFFILIATED	0.515901	0.825124	0.0711327	-0.276598	-0.971135	92
KEGG_COLORECTAL_CANCER	0.516304	0.825124	0.0723571	-0.292043	-0.963065	60
WP_MAMMARY_GLAND_DEVELOPMENT_PATHWAY_PUBERTY_STAGE_2_OF_4	0.516854	0.825575	0.0739901	-0.439209	-0.942912	9
WP_AUTOPHAGY	0.517691	0.826484	0.0736213	-0.336548	-0.967173	29
WP_VITAMIN_D_METABOLISM	0.518095	0.826679	0.0747385	-0.481147	-0.965939	7
WNT_SIGNALING	0.518349	0.826679	0.0845557	0.281321	0.978279	73
WP_INHIBITION_OF_EXOSOME_BIOGENESIS_AND_SECRETION_BY_MANUMYCIN_A_IN_CRPC_CELLS	0.518987	0.82727	0.0799859	0.360455	0.948859	18
REACTOME_RECEPTOR_MEDIATED_MITOPHAGY	0.519507	0.827671	0.0785029	0.411364	0.964897	11
REACTOME_POSTMITOTIC_NUCLEAR_PORE_COMPLEX_NPC_REFORMATION	0.520788	0.829283	0.0817516	0.333726	0.950768	27
KEGG_ETHER_LIPID_METABOLISM	0.521257	0.829602	0.0728939	-0.346892	-0.955153	24
REACTOME_ABACAVIR_TRANSMEMBRANE_TRANSPORT	0.521654	0.829806	0.0760837	0.632387	1.01697	3
BIOCARTA_CDMAC_PATHWAY	0.523077	0.831641	0.0747385	-0.393816	-0.948598	14
WP_PHASE_I_BIOTRANSFORMATIONS_NON_P450	0.526112	0.835324	0.0747385	-0.496507	-0.968258	6
REACTOME_POLB_DEPENDENT_LONG_PATCH_BASE_EXCISION_REPAIR	0.526205	0.835324	0.078921	0.463836	0.956528	7
REACTOME_TRANSPORT_OF_RCBL_WITHIN_THE_BODY	0.526205	0.835324	0.078921	0.463912	0.956684	7
REACTOME_DISORDERS_OF_TRANSMEMBRANE_TRANSPORTERS	0.527682	0.836869	0.0689567	-0.259797	-0.97157	140
REACTOME_FORMATION_OF_APOPTOSOME	0.527721	0.836869	0.0776799	0.407676	0.956247	11
REACTOME_NEGATIVE_REGULATION_OF_FGFR4_SIGNALING	0.529081	0.838594	0.0728939	-0.347879	-0.938233	22
REACTOME_SYNTHESIS_OF_LEUKOTRIENES_LT_AND_EOXINS_EX	0.529915	0.838624	0.0795565	0.43654	0.958153	9
WP_NUCLEOTIDE_EXCISION_REPAIR_IN_XERODERMA_PIGMENTOSUM	0.52967	0.838624	0.0810802	0.285783	0.960583	58
REACTOME_RNA_POLYMERASE_III_TRANSCRIPTION	0.529412	0.838624	0.0826646	0.30985	0.96803	40
REACTOME_NR1H2_NR1H3_REGULATE_GENE_EXPRESSION_LINKED_TO_GLUCONEOGENESIS	0.530938	0.839813	0.0758887	-0.575278	-0.98682	4
WP_PENTOSE_PHOSPHATE_PATHWAY_IN_SENESCENT_CELLS	0.531429	0.840158	0.0734381	-0.472878	-0.949339	7
WP_GLYCOGEN_SYNTHESIS_AND_DEGRADATION	0.531963	0.840573	0.0828962	0.312567	0.952488	37
BIOCARTA_SPPA_PATHWAY	0.532495	0.840982	0.0782955	0.37063	0.944051	16
REACTOME_ACTIVATED_NTRK2_SIGNALS_THROUGH_FYN	0.533849	0.84138	0.0739901	-0.491958	-0.959386	6
WP_PDGFRBETA_PATHWAY	0.536313	0.84138	0.0718276	-0.33354	-0.958529	29
REACTOME_PROTEIN_REPAIR	0.535783	0.84138	0.0738053	-0.491227	-0.95796	6
PID_FCER1_PATHWAY	0.533929	0.84138	0.0699459	-0.299724	-0.955301	50
WP_HOSTPATHOGEN_INTERACTION_OF_HUMAN_CORONAVIRUSES_MAPK_SIGNALING	0.536364	0.84138	0.0706196	-0.319285	-0.955077	36
REACTOME_CASPASE_ACTIVATION_VIA_DEATH_RECEPTORS_IN_THE_PRESENCE_OF_LIGAND	0.533203	0.84138	0.0745501	-0.42606	-0.937392	10
REACTOME_REGULATION_OF_GENE_EXPRESSION_BY_HYPOXIA_INDUCIBLE_FACTOR	0.537109	0.84138	0.0741759	-0.424894	-0.934827	10
REACTOME_INFLAMMASOMES	0.536998	0.84138	0.0782955	0.373676	0.937493	15
BIOCARTA_CSK_PATHWAY	0.533881	0.84138	0.0770737	0.404918	0.949778	11
WP_INTERLEUKIN1_INDUCED_ACTIVATION_OF_NFKB	0.536735	0.84138	0.0764767	0.415717	0.951351	10
REACTOME_EICOSANOID_LIGAND_BINDING_RECEPTORS	0.536325	0.84138	0.078921	0.433444	0.951358	9
WP_SILDENAFIL_TREATMENT	0.534483	0.84138	0.0795565	0.357773	0.955204	20
WP_GPCRS_CLASS_C_METABOTROPIC_GLUTAMATE_PHEROMONE	0.534188	0.84138	0.0791317	0.435799	0.956527	9
REACTOME_HIV_ELONGATION_ARREST_AND_RECOVERY	0.535637	0.84138	0.0795565	0.32092	0.957878	32
REACTOME_BETA_CATENIN_INDEPENDENT_WNT_SIGNALING	0.536232	0.84138	0.0855357	0.251854	0.97283	133
REACTOME_DEUBIQUITINATION	0.536341	0.84138	0.0875697	0.236722	0.976398	226
BIOCARTA_CTBP1_PATHWAY	0.537815	0.842059	0.077884	0.448575	0.963487	8
PID_NEPHRIN_NEPH1_PATHWAY	0.53945	0.844189	0.0707899	-0.333984	-0.94632	27
REACTOME_TP53_REGULATES_TRANSCRIPTION_OF_CASPASE_ACTIVATORS_AND_CASPASES	0.541199	0.846497	0.0716527	-0.433786	-0.93127	9
KEGG_PATHWAYS_IN_CANCER	0.544408	0.846655	0.0649408	-0.238766	-0.967646	283
REACTOME_NEGATIVE_REGULATION_OF_THE_PI3K_AKT_NETWORK	0.544348	0.846655	0.067676	-0.275869	-0.958764	84
WP_STRIATED_MUSCLE_CONTRACTION_PATHWAY	0.543119	0.846655	0.0704501	-0.333132	-0.943908	27
WP_ESTROGEN_SIGNALING_PATHWAY	0.544592	0.846655	0.0720033	-0.354986	-0.939571	21
BIOCARTA_CDK5_PATHWAY	0.544031	0.846655	0.0736213	-0.40392	-0.938476	12
PID_ARF6_DOWNSTREAM_PATHWAY	0.542533	0.846655	0.0720033	-0.378752	-0.934005	15
REACTOME_INDUCTION_OF_CELL_CELL_FUSION	0.543788	0.846655	0.0756946	0.391089	0.932593	12
REACTOME_LOSS_OF_FUNCTION_OF_MECP2_IN_RETT_SYNDROME	0.543788	0.846655	0.0756946	0.391379	0.933284	12
PID_ERBB4_PATHWAY	0.54185	0.846655	0.0799859	0.30885	0.9409	35
REACTOME_REGULATION_OF_COMMISSURAL_AXON_PATHFINDING_BY_SLIT_AND_ROBO	0.542735	0.846655	0.0782955	0.431562	0.947228	9
REACTOME_TRANSPORT_OF_NUCLEOSIDES_AND_FREE_PURINE_AND_PYRIMIDINE_BASES_ACROSS_THE_PLASMA_MEMBRANE	0.542857	0.846655	0.0758887	0.414592	0.948776	10
REACTOME_MELANIN_BIOSYNTHESIS	0.543033	0.846655	0.0760837	0.678401	0.994167	2
WP_HORMONAL_CONTROL_OF_PUBERTAL_GROWTH_SPURT	0.547094	0.847131	0.0745501	-0.717088	-0.965003	1
PID_MYC_ACTIV_PATHWAY	0.546737	0.847131	0.0681513	-0.278001	-0.951442	75
BIOCARTA_CALCINEURIN_PATHWAY	0.545455	0.847131	0.0718276	-0.35983	-0.931338	18
REACTOME_SIGNAL_REGULATORY_PROTEIN_FAMILY_INTERACTIONS	0.546875	0.847131	0.0732559	-0.422984	-0.930624	10
REACTOME_RECOGNITION_OF_DNA_DAMAGE_BY_PCNA_CONTAINING_REPLICATION_COMPLEX	0.546638	0.847131	0.0787114	0.32121	0.939832	30
REACTOME_INTERACTIONS_OF_REV_WITH_HOST_CELLULAR_PROTEINS	0.54646	0.847131	0.0797706	0.30811	0.941858	36
WP_NEURAL_CREST_CELL_MIGRATION_DURING_DEVELOPMENT	0.545259	0.847131	0.0785029	0.316103	0.95151	33
REACTOME_SIGNALING_BY_HEDGEHOG	0.546099	0.847131	0.0833634	0.245961	0.962159	142
WP_THYMIC_STROMAL_LYMPHOPOIETIN_TSLP_SIGNALING_PATHWAY	0.548214	0.84844	0.0686326	-0.310332	-0.945054	40
KEGG_GRAFT_VERSUS_HOST_DISEASE	0.550476	0.84981	0.0716527	-0.367677	-0.921409	16
REACTOME_SIGNALING_BY_NTRK3_TRKC	0.550476	0.84981	0.0716527	-0.367646	-0.921331	16
BIOCARTA_NKT_PATHWAY	0.550308	0.84981	0.0755015	0.395752	0.928277	11
WP_SELECTIVE_EXPRESSION_OF_CHEMOKINE_RECEPTORS_DURING_TCELL_POLARIZATION	0.550308	0.84981	0.0755015	0.395752	0.928277	11
REACTOME_PROCESSING_OF_INTRONLESS_PRE_MRNAS	0.549569	0.84981	0.0780892	0.353887	0.94483	20
[truncated: 1,087 more rows]

## Sheet: CP_gsea_Canonical_pathways
pathway	pval	padj	log2err	ES	NES	size
REACTOME_SYNTHESIS_OF_DNA	6.46976e-11	2.85132e-08	0.839089	-0.629218	-2.30243	116
REACTOME_DNA_REPLICATION	3.25544e-11	1.67384e-08	0.851339	-0.621604	-2.27345	122
REACTOME_S_PHASE	9.03965e-12	5.57746e-09	0.875325	-0.584289	-2.20396	158
REACTOME_G2_M_CHECKPOINTS	3.83846e-10	1.31574e-07	0.814036	-0.598358	-2.20168	128
REACTOME_COOPERATION_OF_PREFOLDIN_AND_TRIC_CCT_IN_ACTIN_AND_TUBULIN_FOLDING	1.07749e-06	0.000138503	0.643552	-0.793773	-2.19798	26
WP_RETINOBLASTOMA_GENE_IN_CANCER	2.47042e-08	5.08084e-06	0.733762	-0.62591	-2.18113	86
WP_DNA_REPLICATION	9.04567e-07	0.00012133	0.659444	-0.718906	-2.17969	41
REACTOME_CHROMOSOME_MAINTENANCE	2.25437e-08	5.0169e-06	0.733762	-0.61734	-2.17771	91
REACTOME_TELOMERE_MAINTENANCE	1.69425e-07	2.75093e-05	0.690132	-0.660057	-2.17587	64
REACTOME_CELL_CYCLE_CHECKPOINTS	1.10159e-13	8.49602e-11	0.954542	-0.544917	-2.16995	248
REACTOME_DNA_STRAND_ELONGATION	4.97906e-06	0.000495497	0.610527	-0.740841	-2.15725	32
REACTOME_FORMATION_OF_TUBULIN_FOLDING_INTERMEDIATES_BY_CCT_TRIC	7.367e-06	0.000710224	0.610527	-0.819322	-2.13713	19
KEGG_CELL_CYCLE	3.61627e-08	6.97263e-06	0.719513	-0.572256	-2.09644	117
REACTOME_MITOTIC_G1_PHASE_AND_G1_S_TRANSITION	2.61353e-09	8.06274e-07	0.774939	-0.560791	-2.09416	143
REACTOME_ACTIVATION_OF_THE_PRE_REPLICATIVE_COMPLEX	2.19844e-05	0.00165419	0.57561	-0.717253	-2.08857	32
REACTOME_EXTENSION_OF_TELOMERES	1.00721e-05	0.00094159	0.593325	-0.661773	-2.08546	50
REACTOME_G2_M_DNA_DAMAGE_CHECKPOINT	2.99121e-06	0.000318203	0.627257	-0.637122	-2.08397	59
WP_CELL_CYCLE	1.38668e-07	2.37662e-05	0.690132	-0.571422	-2.07523	113
REACTOME_ACTIVATION_OF_ATR_IN_RESPONSE_TO_REPLICATION_STRESS	2.06101e-05	0.00158955	0.57561	-0.699406	-2.06531	36
REACTOME_DNA_REPLICATION_PRE_INITIATION	2.47065e-07	3.81098e-05	0.674963	-0.579409	-2.0618	97
REACTOME_CELL_CYCLE	4.69664e-21	1.44891e-17	1.18665	-0.479095	-2.05761	599
REACTOME_LAGGING_STRAND_SYNTHESIS	5.74252e-05	0.00340686	0.557332	-0.776095	-2.05509	20
REACTOME_TP53_REGULATES_TRANSCRIPTION_OF_GENES_INVOLVED_IN_G2_CELL_CYCLE_ARREST	8.98192e-05	0.0045425	0.538434	-0.799057	-2.05091	18
REACTOME_SWITCHING_OF_ORIGINS_TO_A_POST_REPLICATIVE_STATE	4.39744e-07	6.46005e-05	0.674963	-0.581599	-2.03578	87
REACTOME_CYCLIN_A_B1_B2_ASSOCIATED_EVENTS_DURING_G2_M_TRANSITION	5.71049e-05	0.00340686	0.557332	-0.75042	-2.03326	24
REACTOME_PROCESSING_OF_DNA_DOUBLE_STRAND_BREAK_ENDS	1.3977e-05	0.00123705	0.593325	-0.613491	-2.01503	61
REACTOME_TP53_REGULATES_TRANSCRIPTION_OF_CELL_CYCLE_GENES	1.40346e-05	0.00123705	0.593325	-0.641054	-2.00371	47
REACTOME_DNA_DOUBLE_STRAND_BREAK_REPAIR	1.13452e-07	2.05882e-05	0.704976	-0.542919	-1.99723	131
REACTOME_CELL_CYCLE_MITOTIC	2.50761e-15	2.57866e-12	1.00732	-0.470275	-1.99591	480
REACTOME_CHOLESTEROL_BIOSYNTHESIS	0.00011582	0.00549698	0.538434	-0.719975	-1.99363	26
REACTOME_REGULATION_OF_TP53_ACTIVITY_THROUGH_PHOSPHORYLATION	2.04857e-06	0.000234068	0.627257	-0.566635	-1.9834	87
REACTOME_MITOTIC_G2_G2_M_PHASES	2.27671e-08	5.0169e-06	0.733762	-0.516044	-1.98054	185
REACTOME_TRANSCRIPTIONAL_REGULATION_BY_SMALL_RNAS	6.29002e-05	0.00359346	0.538434	-0.632226	-1.97548	46
REACTOME_SUMOYLATION_OF_DNA_REPLICATION_PROTEINS	3.54721e-05	0.00227982	0.557332	-0.635461	-1.97217	45
REACTOME_RESOLUTION_OF_AP_SITES_VIA_THE_MULTIPLE_NUCLEOTIDE_PATCH_REPLACEMENT_PATHWAY	0.0001848	0.00780971	0.518848	-0.727069	-1.96999	24
PID_ATR_PATHWAY	8.20573e-05	0.0043646	0.538434	-0.650222	-1.96189	38
REACTOME_APC_C_MEDIATED_DEGRADATION_OF_CELL_CYCLE_PROTEINS	2.39629e-05	0.0017192	0.57561	-0.560681	-1.95483	83
WP_CHOLESTEROL_SYNTHESIS_DISORDERS	0.000340193	0.0119261	0.498493	-0.7606	-1.95357	17
REACTOME_GLUCONEOGENESIS	0.000237927	0.00941033	0.518848	-0.705469	-1.95346	26
REACTOME_G1_S_SPECIFIC_TRANSCRIPTION	0.000223034	0.00917415	0.518848	-0.687079	-1.94924	28
REACTOME_PCNA_DEPENDENT_LONG_PATCH_BASE_EXCISION_REPAIR	0.000282422	0.0106253	0.498493	-0.732748	-1.94397	21
REACTOME_HOMOLOGY_DIRECTED_REPAIR	4.3872e-06	0.00045115	0.610527	-0.542259	-1.94297	102
REACTOME_CELL_CELL_JUNCTION_ORGANIZATION	4.33648e-05	0.00273021	0.557332	-0.607948	-1.9421	53
BIOCARTA_TEL_PATHWAY	0.000463898	0.0143113	0.498493	-0.755976	-1.94169	17
REACTOME_GLUCOSE_METABOLISM	1.75054e-05	0.00142116	0.57561	-0.565312	-1.93738	78
KEGG_MISMATCH_REPAIR	0.000379105	0.0129949	0.498493	-0.722254	-1.93595	22
REACTOME_ORC1_REMOVAL_FROM_CHROMATIN	1.98016e-05	0.00156636	0.57561	-0.581168	-1.93332	66
REACTOME_TIGHT_JUNCTION_INTERACTIONS	0.000419813	0.0136329	0.498493	-0.720117	-1.93022	22
KEGG_BIOSYNTHESIS_OF_UNSATURATED_FATTY_ACIDS	0.000389282	0.0131971	0.498493	-0.727525	-1.93011	21
REACTOME_FOLDING_OF_ACTIN_BY_CCT_TRIC	0.000456347	0.0142213	0.498493	-0.868133	-1.92271	10
REACTOME_INTERACTIONS_OF_REV_WITH_HOST_CELLULAR_PROTEINS	0.00032092	0.0113799	0.498493	-0.649984	-1.91937	36
REACTOME_FGFR2_ALTERNATIVE_SPLICING	0.000699022	0.0184315	0.477271	-0.680709	-1.91786	27
REACTOME_HIV_LIFE_CYCLE	1.25336e-06	0.000154665	0.643552	-0.513542	-1.91449	144
WP_MRNA_PROCESSING	1.62999e-06	0.000193404	0.643552	-0.518336	-1.90676	125
REACTOME_PROCESSIVE_SYNTHESIS_ON_THE_LAGGING_STRAND	0.000641155	0.0173721	0.477271	-0.769733	-1.90561	15
REACTOME_HCMV_EARLY_EVENTS	3.41581e-05	0.00224208	0.557332	-0.571866	-1.90237	66
REACTOME_THE_ROLE_OF_GTSE1_IN_G2_M_PROGRESSION_AFTER_G2_CHECKPOINT	3.41581e-05	0.00224208	0.557332	-0.57168	-1.90176	66
REACTOME_TELOMERE_C_STRAND_LAGGING_STRAND_SYNTHESIS	0.000270426	0.0104283	0.498493	-0.645811	-1.89859	34
REACTOME_POLO_LIKE_KINASE_MEDIATED_EVENTS	0.00103262	0.0237733	0.45506	-0.748023	-1.89624	16
WP_G1_TO_S_CELL_CYCLE_CONTROL	0.000120922	0.00565217	0.538434	-0.576987	-1.89513	61
REACTOME_NFE2L2_REGULATING_ANTI_OXIDANT_DETOXIFICATION_ENZYMES	0.000817348	0.0203909	0.477271	-0.765172	-1.89432	15
REACTOME_HSP90_CHAPERONE_CYCLE_FOR_STEROID_HORMONE_RECEPTORS_SHR_IN_THE_PRESENCE_OF_LIGAND	8.10439e-05	0.0043646	0.538434	-0.605474	-1.8925	47
WP_TUMOR_SUPPRESSOR_ACTIVITY_OF_SMARCB1	0.00119985	0.0268227	0.45506	-0.670001	-1.88769	27
REACTOME_RHOBTB2_GTPASE_CYCLE	0.000499502	0.0147759	0.477271	-0.704164	-1.88546	23
REACTOME_TRANSCRIPTIONAL_REGULATION_BY_TP53	3.78761e-10	1.31574e-07	0.814036	-0.458921	-1.88317	345
WP_CHOLESTEROL_BIOSYNTHESIS_PATHWAY	0.00115093	0.0259169	0.45506	-0.760143	-1.88187	15
REACTOME_TP53_REGULATES_TRANSCRIPTION_OF_GENES_INVOLVED_IN_G1_CELL_CYCLE_ARREST	0.00127903	0.0274014	0.45506	-0.791525	-1.87946	13
REACTOME_REGULATION_OF_TP53_ACTIVITY	8.31572e-07	0.000116609	0.659444	-0.502689	-1.87689	151
WP_OMEGA9_FATTY_ACID_SYNTHESIS	0.00148367	0.0311368	0.45506	-0.788112	-1.87135	13
REACTOME_DISEASES_OF_MITOTIC_CELL_CYCLE	0.000413742	0.0136329	0.498493	-0.620083	-1.87096	38
KEGG_DILATED_CARDIOMYOPATHY	7.33098e-05	0.00403858	0.538434	-0.545559	-1.86969	78
REACTOME_POLYMERASE_SWITCHING	0.00123227	0.0269507	0.45506	-0.762792	-1.8667	14
KEGG_DNA_REPLICATION	0.000596977	0.0165916	0.477271	-0.631331	-1.8638	35
REACTOME_VIRAL_MESSENGER_RNA_SYNTHESIS	0.000183557	0.00780971	0.518848	-0.610807	-1.86211	43
REACTOME_NS1_MEDIATED_EFFECTS_ON_HOST_PATHWAYS	0.000555185	0.0157133	0.477271	-0.618225	-1.86122	39
REACTOME_HOMOLOGOUS_DNA_PAIRING_AND_STRAND_EXCHANGE	0.000311355	0.0113004	0.498493	-0.614843	-1.85983	42
REACTOME_CELL_JUNCTION_ORGANIZATION	7.29231e-05	0.00403858	0.538434	-0.543316	-1.8587	76
WP_STRIATED_MUSCLE_CONTRACTION_PATHWAY	0.000793088	0.0200547	0.477271	-0.637245	-1.85738	31
REACTOME_SUMOYLATION_OF_RNA_BINDING_PROTEINS	0.000456373	0.0142213	0.498493	-0.593113	-1.85326	46
KEGG_HYPERTROPHIC_CARDIOMYOPATHY_HCM	6.23665e-05	0.00359346	0.538434	-0.551913	-1.84951	70
REACTOME_GLYCOLYSIS	0.000211407	0.00881338	0.518848	-0.561304	-1.84897	63
KEGG_PROTEASOME	0.00063521	0.0173721	0.477271	-0.613772	-1.84781	39
REACTOME_NUCLEAR_IMPORT_OF_REV_PROTEIN	0.00144158	0.0304608	0.45506	-0.63055	-1.84385	33
PID_MYC_ACTIV_PATHWAY	0.000113532	0.0054738	0.538434	-0.536673	-1.83924	78
REACTOME_G0_AND_EARLY_G1	0.0012426	0.0269507	0.45506	-0.663313	-1.83673	26
KEGG_TIGHT_JUNCTION	2.83308e-05	0.00194223	0.57561	-0.505566	-1.83606	113
REACTOME_SUMOYLATION_OF_SUMOYLATION_PROTEINS	0.000980362	0.0235656	0.45506	-0.622331	-1.82956	34
REACTOME_HSF1_DEPENDENT_TRANSACTIVATION	0.00100068	0.0235656	0.45506	-0.621601	-1.82741	34
REACTOME_AGGREPHAGY	0.00105158	0.0240305	0.45506	-0.620264	-1.82348	34
REACTOME_TRANSPORT_OF_MATURE_MRNAS_DERIVED_FROM_INTRONLESS_TRANSCRIPTS	0.000496621	0.0147759	0.477271	-0.602649	-1.82294	42
REACTOME_E2F_MEDIATED_REGULATION_OF_DNA_REPLICATION	0.00270616	0.0477057	0.431708	-0.67976	-1.82205	22
KEGG_CARDIAC_MUSCLE_CONTRACTION	0.000289457	0.0107076	0.498493	-0.552437	-1.8211	64
BIOCARTA_REELIN_PATHWAY	0.000433099	0.0139178	0.498493	-0.907269	-1.8203	7
REACTOME_DNA_REPAIR	1.87509e-08	5.0169e-06	0.733762	-0.452236	-1.81633	283
REACTOME_TRANSPORT_OF_THE_SLBP_DEPENDANT_MATURE_MRNA	0.00122036	0.0269507	0.45506	-0.614856	-1.81517	35
REACTOME_CELLULAR_RESPONSE_TO_HEAT_STRESS	8.60751e-05	0.0044257	0.538434	-0.510695	-1.81093	96
REACTOME_STRIATED_MUSCLE_CONTRACTION	0.00143833	0.0304608	0.45506	-0.638273	-1.81077	28
WP_CHOLESTEROL_METABOLISM_WITH_BLOCH_AND_KANDUTSCHRUSSELL_PATHWAYS	0.000650923	0.0174617	0.477271	-0.588522	-1.80589	44
REACTOME_APC_C_CDH1_MEDIATED_DEGRADATION_OF_CDC20_AND_OTHER_APC_C_CDH1_TARGETED_PROTEINS_IN_LATE_MITOSIS_EARLY_G1	0.000140827	0.0062964	0.518848	-0.538419	-1.80429	70
REACTOME_SIGNALING_BY_FGFR2	0.000406899	0.0136329	0.498493	-0.547495	-1.8042	62
REACTOME_DISEASES_OF_DNA_REPAIR	0.00100859	0.023572	0.45506	-0.572038	-1.80267	50
REACTOME_CELL_CELL_COMMUNICATION	4.57853e-05	0.00282495	0.557332	-0.500071	-1.79644	104
PID_NFAT_3PATHWAY	0.000493927	0.0147759	0.477271	-0.562338	-1.7964	53
WP_DNA_MISMATCH_REPAIR	0.00170736	0.0337149	0.45506	-0.670854	-1.79627	23
REACTOME_GENE_SILENCING_BY_RNA	0.000235355	0.00941033	0.518848	-0.537845	-1.79598	69
REACTOME_REGULATION_OF_GLUCOKINASE_BY_GLUCOKINASE_REGULATORY_PROTEIN	0.00250908	0.0459375	0.431708	-0.620703	-1.78738	30
PID_E2F_PATHWAY	0.000266246	0.0103971	0.498493	-0.535027	-1.78657	69
REACTOME_TRANSCRIPTION_OF_THE_HIV_GENOME	0.000502908	0.0147759	0.477271	-0.536209	-1.78456	67
REACTOME_TRANSPORT_OF_MATURE_TRANSCRIPT_TO_CYTOPLASM	0.000158595	0.00689107	0.518848	-0.513552	-1.77926	81
REACTOME_RHO_GTPASES_ACTIVATE_FORMINS	2.2587e-05	0.00165907	0.57561	-0.48358	-1.77628	129
REACTOME_CYCLIN_A_CDK2_ASSOCIATED_EVENTS_AT_S_PHASE_ENTRY	0.000362818	0.0125763	0.498493	-0.512419	-1.77618	82
REACTOME_SNRNP_ASSEMBLY	0.000758552	0.0195011	0.477271	-0.554388	-1.771	53
PID_FANCONI_PATHWAY	0.000826213	0.0203909	0.477271	-0.570214	-1.76967	45
REACTOME_RHOBTB_GTPASE_CYCLE	0.00220544	0.0416112	0.431708	-0.598735	-1.76758	35
REACTOME_RHO_GTPASES_ACTIVATE_IQGAPS	0.00251651	0.0459375	0.431708	-0.659517	-1.76591	23
REACTOME_RRNA_MODIFICATION_IN_THE_NUCLEUS_AND_CYTOSOL	0.00075695	0.0195011	0.477271	-0.537999	-1.75975	59
REACTOME_NGF_STIMULATED_TRANSCRIPTION	0.00215458	0.0412849	0.431708	-0.597884	-1.75769	34
REACTOME_NUCLEAR_EVENTS_MEDIATED_BY_NFE2L2	0.000641951	0.0173721	0.477271	-0.515939	-1.75417	74
REACTOME_RNA_POLYMERASE_II_TRANSCRIPTION	6.93541e-19	1.06979e-15	1.12391	-0.388926	-1.74377	1209
REACTOME_RESOLUTION_OF_ABASIC_SITES_AP_SITES	0.00267083	0.0477057	0.431708	-0.583806	-1.73652	37
REACTOME_HDR_THROUGH_HOMOLOGOUS_RECOMBINATION_HRR	0.000886379	0.0217022	0.477271	-0.521552	-1.73578	67
REACTOME_KINESINS	0.00246357	0.0455096	0.431708	-0.552303	-1.72575	46
REACTOME_MITOTIC_SPINDLE_CHECKPOINT	0.000282324	0.0106253	0.498493	-0.47425	-1.72339	110
REACTOME_AURKA_ACTIVATION_BY_TPX2	0.000519123	0.0151084	0.477271	-0.511465	-1.72144	71
REACTOME_UPTAKE_AND_FUNCTION_OF_DIPHTHERIA_TOXIN	0.00194502	0.0377384	0.45506	-0.896555	-1.71545	6
REACTOME_REGULATION_OF_PLK1_ACTIVITY_AT_G2_M_TRANSITION	0.000418073	0.0136329	0.498493	-0.4917	-1.71344	86
REACTOME_NUCLEAR_EVENTS_KINASE_AND_TRANSCRIPTION_FACTOR_ACTIVATION	0.00157827	0.0328984	0.45506	-0.529843	-1.70962	56
WP_HEART_DEVELOPMENT	0.00204773	0.0394828	0.431708	-0.563354	-1.70408	42
REACTOME_RNA_POLYMERASE_II_PRE_TRANSCRIPTION_EVENTS	0.00101659	0.0235803	0.45506	-0.500293	-1.70368	77
REACTOME_REGULATION_OF_MRNA_STABILITY_BY_PROTEINS_THAT_BIND_AU_RICH_ELEMENTS	0.00124925	0.0269507	0.45506	-0.48806	-1.70163	83
REACTOME_SIGNALING_BY_FGFR	0.00165827	0.0336564	0.45506	-0.501902	-1.69472	73
WP_DNA_IRDAMAGE_AND_CELLULAR_RESPONSE_VIA_ATR	0.000579159	0.0162428	0.477271	-0.48949	-1.69453	80
REACTOME_SCF_SKP2_MEDIATED_DEGRADATION_OF_P27_P21	0.00269313	0.0477057	0.431708	-0.522954	-1.69366	57
REACTOME_REGULATION_OF_HSF1_MEDIATED_HEAT_SHOCK_RESPONSE	0.00111161	0.0252155	0.45506	-0.49082	-1.68209	78
REACTOME_RHO_GTPASE_EFFECTORS	1.58918e-05	0.00132503	0.57561	-0.4235	-1.68199	238
WP_DNA_REPAIR_PATHWAYS_FULL_NETWORK	0.000486726	0.0147759	0.498493	-0.458185	-1.68195	119
WP_DNA_DAMAGE_RESPONSE	0.00160752	0.0332044	0.45506	-0.508441	-1.68171	65
REACTOME_TP53_REGULATES_TRANSCRIPTION_OF_DNA_REPAIR_GENES	0.00217623	0.0414424	0.431708	-0.510484	-1.6767	61
REACTOME_MITOTIC_METAPHASE_AND_ANAPHASE	1.58918e-05	0.00132503	0.57561	-0.422333	-1.66101	222
REACTOME_SEPARATION_OF_SISTER_CHROMATIDS	9.24244e-05	0.00459886	0.538434	-0.431821	-1.64917	177
REACTOME_HCMV_INFECTION	0.00221207	0.0416112	0.431708	-0.469536	-1.64812	90
REACTOME_M_PHASE	2.21948e-06	0.000244539	0.627257	-0.401872	-1.64754	340
REACTOME_SUMOYLATION_OF_DNA_DAMAGE_RESPONSE_AND_REPAIR_PROTEINS	0.00191962	0.0374812	0.45506	-0.483941	-1.64538	74
KEGG_ARRHYTHMOGENIC_RIGHT_VENTRICULAR_CARDIOMYOPATHY_ARVC	0.00169588	0.0337149	0.45506	-0.494189	-1.64397	66
WP_ARRHYTHMOGENIC_RIGHT_VENTRICULAR_CARDIOMYOPATHY	0.00169588	0.0337149	0.45506	-0.494189	-1.64397	66
WP_MIRNA_REGULATION_OF_DNA_DAMAGE_RESPONSE	0.00170592	0.0337149	0.45506	-0.492542	-1.64219	68
REACTOME_KEAP1_NFE2L2_PATHWAY	0.00123627	0.0269507	0.45506	-0.456271	-1.6338	100
KEGG_SPLICEOSOME	0.000553198	0.0157133	0.477271	-0.442007	-1.62597	125
REACTOME_METABOLISM_OF_CARBOHYDRATES	2.45977e-05	0.00172464	0.57561	-0.407845	-1.62274	254
WP_SECRETION_OF_HYDROCHLORIC_ACID_IN_PARIETAL_CELLS	0.00100068	0.0235656	0.45506	-0.979086	-1.57761	3
REACTOME_HIV_INFECTION	0.000291553	0.0107076	0.498493	-0.40268	-1.57529	217
REACTOME_METABOLISM_OF_RNA	1.98008e-08	5.0169e-06	0.733762	-0.361692	-1.56104	686
WP_CIRCADIAN_RHYTHM_GENES	0.000735166	0.0192202	0.477271	-0.41157	-1.56038	160
REACTOME_MUSCLE_CONTRACTION	0.000821529	0.0203909	0.477271	-0.40957	-1.55727	161
REACTOME_SIGNALING_BY_TGFB_FAMILY_MEMBERS	0.0025455	0.0461933	0.431708	-0.415666	-1.521	116
REACTOME_PROCESSING_OF_CAPPED_INTRON_CONTAINING_PRE_MRNA	0.000124249	0.00572102	0.518848	-0.379774	-1.52057	277
REACTOME_METABOLISM_OF_AMINO_ACIDS_AND_DERIVATIVES	0.00270091	0.0477057	0.431708	-0.343751	-1.39664	300
WP_VEGFAVEGFR2_SIGNALING	0.000930215	0.0225962	0.477271	-0.327231	-1.37	410
REACTOME_INNATE_IMMUNE_SYSTEM	0.000545104	0.0157133	0.477271	0.321508	1.33529	733
REACTOME_DEATH_RECEPTOR_SIGNALING	0.00228442	0.0427117	0.431708	0.422239	1.51398	143
BIOCARTA_CTL_PATHWAY	0.000780834	0.019908	0.477271	0.961387	1.5971	4
WP_BARDETBIEDL_SYNDROME	0.000990925	0.0235656	0.45506	0.518694	1.6964	77
WP_NOVEL_INTRACELLULAR_COMPONENTS_OF_RIGILIKE_RECEPTOR_PATHWAY	0.00162333	0.0332044	0.45506	0.577322	1.7408	48
REACTOME_TRAF3_DEPENDENT_IRF_ACTIVATION_PATHWAY	0.00237817	0.0441966	0.431708	0.762693	1.74463	13
REACTOME_INTERLEUKIN_10_SIGNALING	0.0017158	0.0337149	0.45506	0.759037	1.74836	14
REACTOME_TRAF6_MEDIATED_IRF7_ACTIVATION	0.00262992	0.0474462	0.431708	0.75049	1.75118	15
KEGG_PRIMARY_IMMUNODEFICIENCY	0.000673363	0.017908	0.477271	0.757918	1.79751	17
REACTOME_TNF_SIGNALING	0.000441845	0.0140525	0.498493	0.584155	1.79756	55
REACTOME_NF_KB_ACTIVATION_THROUGH_FADD_RIP_1_PATHWAY_MEDIATED_BY_CASPASE_8_AND_10	0.00162524	0.0332044	0.45506	0.808216	1.81467	12
KEGG_RIG_I_LIKE_RECEPTOR_SIGNALING_PATHWAY	0.000320924	0.0113799	0.498493	0.614486	1.83029	45
REACTOME_ACETYLCHOLINE_REGULATES_INSULIN_SECRETION	0.000113557	0.0054738	0.538434	0.895219	1.84855	9
WP_TYROBP_CAUSAL_NETWORK_IN_MICROGLIA	0.000226547	0.00919602	0.518848	0.629763	1.8701	43
WP_NCRNAS_INVOLVED_IN_STAT3_SIGNALING_IN_HEPATOCELLULAR_CARCINOMA	0.000153981	0.00678616	0.518848	0.854453	1.88553	11
REACTOME_OVARIAN_TUMOR_DOMAIN_PROTEASES	8.55386e-05	0.0044257	0.538434	0.68538	1.93369	35
WP_TOLLLIKE_RECEPTOR_SIGNALING_RELATED_TO_MYD88	0.000133955	0.00607725	0.518848	0.735123	1.93685	25
NABA_ECM_AFFILIATED	0.00287313	0.0503615	0.431708	0.46816	1.56372	88
REACTOME_MITOTIC_PROPHASE	0.00291928	0.0508812	0.431708	-0.461473	-1.59883	81
REACTOME_SUMOYLATION	0.00300131	0.0515964	0.431708	-0.379955	-1.44283	162
REACTOME_PEPTIDE_HORMONE_BIOSYNTHESIS	0.00300353	0.0515964	0.431708	-0.986215	-1.46651	2
REACTOME_FORMATION_OF_RNA_POL_II_ELONGATION_COMPLEX	0.00301049	0.0515964	0.431708	-0.511829	-1.65149	56
REACTOME_NUCLEOTIDE_BINDING_DOMAIN_LEUCINE_RICH_REPEAT_CONTAINING_RECEPTOR_NLR_SIGNALING_PATHWAYS	0.00304839	0.0519573	0.431708	0.550536	1.64833	47
REACTOME_TRANSCRIPTION_OF_E2F_TARGETS_UNDER_NEGATIVE_CONTROL_BY_P107_RBL1_AND_P130_RBL2_IN_COMPLEX_WITH_HDAC1	0.00308403	0.052276	0.431708	-0.711354	-1.80328	16
REACTOME_INHIBITION_OF_REPLICATION_INITIATION_OF_DAMAGED_DNA_BY_RB1_E2F1	0.00310538	0.0523502	0.431708	-0.764734	-1.81584	13
REACTOME_ANTIGEN_PRESENTATION_FOLDING_ASSEMBLY_AND_PEPTIDE_LOADING_OF_CLASS_I_MHC	0.0031911	0.0532138	0.431708	0.64856	1.71775	26
REACTOME_CHK1_CHK2_CDS1_MEDIATED_INACTIVATION_OF_CYCLIN_B_CDK1_COMPLEX	0.00318764	0.0532138	0.431708	-0.76369	-1.81336	13
NABA_MATRISOME	0.00357452	0.0592871	0.431708	0.32509	1.328	555
PID_P53_DOWNSTREAM_PATHWAY	0.00382741	0.0631421	0.431708	-0.422689	-1.54605	120
PID_RAS_PATHWAY	0.00385359	0.0632358	0.431708	0.627391	1.68956	29
REACTOME_NUCLEAR_PORE_COMPLEX_NPC_DISASSEMBLY	0.00397799	0.0649318	0.407018	-0.583586	-1.72285	35
REACTOME_DEFECTIVE_INTRINSIC_PATHWAY_FOR_APOPTOSIS	0.00406954	0.0660765	0.407018	-0.666469	-1.78643	22
KEGG_OOCYTE_MEIOSIS	0.00420747	0.0679583	0.407018	-0.429402	-1.52801	97
REACTOME_RESOLUTION_OF_SISTER_CHROMATID_COHESION	0.00430253	0.0687737	0.407018	-0.404376	-1.47969	116
REACTOME_BASE_EXCISION_REPAIR	0.00430169	0.0687737	0.407018	-0.527518	-1.6187	44
REACTOME_INITIAL_TRIGGERING_OF_COMPLEMENT	0.00451242	0.0717568	0.407018	0.746316	1.70717	13
REACTOME_ANTIGEN_ACTIVATES_B_CELL_RECEPTOR_BCR_LEADING_TO_GENERATION_OF_SECOND_MESSENGERS	0.00460456	0.0727054	0.407018	0.652967	1.69746	24
REACTOME_G1_S_DNA_DAMAGE_CHECKPOINTS	0.00461921	0.0727054	0.407018	-0.489245	-1.60694	61
REACTOME_SCF_BETA_TRCP_MEDIATED_DEGRADATION_OF_EMI1	0.0047323	0.0741074	0.407018	-0.511548	-1.62225	51
PID_CD8_TCR_PATHWAY	0.00493582	0.0769041	0.407018	0.571906	1.68106	41
WP_CILIOPATHIES	0.00506127	0.0772971	0.407018	0.405667	1.47467	150
REACTOME_CELLULAR_RESPONSES_TO_STIMULI	0.00500722	0.0772971	0.407018	-0.285247	-1.23158	687
KEGG_RNA_DEGRADATION	0.00505028	0.0772971	0.407018	-0.527151	-1.67876	52
REACTOME_POSTMITOTIC_NUCLEAR_PORE_COMPLEX_NPC_REFORMATION	0.00501262	0.0772971	0.407018	-0.628565	-1.77095	27
REACTOME_POTASSIUM_CHANNELS	0.00520017	0.0779577	0.407018	-0.464895	-1.55001	68
REACTOME_ASYMMETRIC_LOCALIZATION_OF_PCP_PROTEINS	0.00518173	0.0779577	0.407018	-0.48994	-1.60255	59
REACTOME_EXPORT_OF_VIRAL_RIBONUCLEOPROTEINS_FROM_NUCLEUS	0.00518993	0.0779577	0.407018	-0.590665	-1.71996	32
WP_CELL_DIFFERENTIATION_EXPANDED_INDEX	0.00520561	0.0779577	0.407018	-0.719687	-1.78171	15
WP_T_CELL_MODULATION_IN_PANCREATIC_CANCER	0.00533333	0.0794847	0.407018	0.649699	1.68897	24
WP_EXERCISEINDUCED_CIRCADIAN_REGULATION	0.00536684	0.0795995	0.407018	-0.522247	-1.60252	44
REACTOME_NOD1_2_SIGNALING_PATHWAY	0.00542872	0.080132	0.407018	0.594157	1.64697	32
REACTOME_RHO_GTPASES_ACTIVATE_ROCKS	0.00545573	0.0801473	0.407018	-0.681983	-1.77889	19
BIOCARTA_STAT3_PATHWAY	0.0054854	0.0802012	0.407018	0.835621	1.67596	8
REACTOME_ACTIVATION_OF_BH3_ONLY_PROTEINS	0.00560774	0.0816031	0.407018	-0.590978	-1.70178	30
REACTOME_FANCONI_ANEMIA_PATHWAY	0.00564463	0.0817544	0.407018	-0.55713	-1.67729	39
REACTOME_METABOLISM_OF_VITAMINS_AND_COFACTORS	0.00572365	0.0825115	0.407018	-0.380092	-1.43393	157
REACTOME_MITOTIC_PROMETAPHASE	0.00575354	0.0825566	0.407018	-0.369465	-1.4258	192
BIOCARTA_MCM_PATHWAY	0.00584139	0.0834292	0.407018	-0.701201	-1.79974	18
PID_BCR_5PATHWAY	0.00591059	0.0840284	0.407018	0.525997	1.6186	55
WP_MAMMARY_GLAND_DEVELOPMENT_PATHWAY_INVOLUTION_STAGE_4_OF_4	0.00594927	0.0841904	0.407018	-0.799198	-1.71913	9
REACTOME_TRNA_PROCESSING_IN_THE_NUCLEUS	0.00598261	0.0842756	0.407018	-0.501085	-1.62283	57
REACTOME_SARS_COV_1_TARGETS_HOST_INTRACELLULAR_SIGNALLING_AND_REGULATORY_PATHWAYS	0.00604259	0.0847335	0.407018	-0.689926	-1.74896	16
BIOCARTA_BCR_PATHWAY	0.00609481	0.0850791	0.407018	0.589795	1.63488	32
REACTOME_TRANSLESION_SYNTHESIS_BY_Y_FAMILY_DNA_POLYMERASES_BYPASSES_LESIONS_ON_DNA_TEMPLATE	0.00613193	0.0852117	0.407018	-0.553818	-1.66732	39
WP_PARKINUBIQUITIN_PROTEASOMAL_SYSTEM_PATHWAY	0.00623876	0.0863075	0.407018	-0.488725	-1.60641	60
REACTOME_HDR_THROUGH_SINGLE_STRAND_ANNEALING_SSA	0.00632615	0.0871258	0.407018	-0.564642	-1.66736	36
REACTOME_FGFR2_MUTANT_RECEPTOR_ACTIVATION	0.00639547	0.087689	0.407018	-0.636321	-1.72411	24
REACTOME_NEGATIVE_REGULATORS_OF_DDX58_IFIH1_SIGNALING	0.00644808	0.0880191	0.407018	0.601572	1.68087	33
REACTOME_DNA_DOUBLE_STRAND_BREAK_RESPONSE	0.00651853	0.0885888	0.407018	-0.519494	-1.58374	43
REACTOME_DEFECTS_OF_CONTACT_ACTIVATION_SYSTEM_CAS_AND_KALLIKREIN_KININ_SYSTEM_KKS	0.00683333	0.0918884	0.407018	0.757328	1.67121	11
REACTOME_RNA_POLYMERASE_II_TRANSCRIPTION_TERMINATION	0.00685068	0.0918884	0.407018	-0.461923	-1.53664	66
REACTOME_ATTENUATION_PHASE	0.00679976	0.0918884	0.407018	-0.631377	-1.71834	25
REACTOME_VOLTAGE_GATED_POTASSIUM_CHANNELS	0.00689707	0.0921102	0.407018	-0.589421	-1.67218	28
REACTOME_CYTOSOLIC_SULFONATION_OF_SMALL_MOLECULES	0.00701318	0.0932571	0.407018	0.688467	1.66258	18
WP_TLR4_SIGNALING_AND_TOLERANCE	0.00725725	0.0932858	0.407018	0.642055	1.66909	24
PID_IL1_PATHWAY	0.00725725	0.0932858	0.407018	0.611986	1.64793	28
WP_MYOMETRIAL_RELAXATION_AND_CONTRACTION_PATHWAYS	0.00713306	0.0932858	0.407018	-0.389918	-1.43818	132
WP_ENDOCHONDRAL_OSSIFICATION	0.00720575	0.0932858	0.407018	-0.495962	-1.60016	55
WP_ENDOCHONDRAL_OSSIFICATION_WITH_SKELETAL_DYSPLASIAS	0.00720575	0.0932858	0.407018	-0.495962	-1.60016	55
PID_RB_1PATHWAY	0.00712214	0.0932858	0.407018	-0.496007	-1.60639	57
WP_BASE_EXCISION_REPAIR	0.00707907	0.0932858	0.407018	-0.576515	-1.68037	31
BIOCARTA_P27_PATHWAY	0.00723343	0.0932858	0.407018	-0.73393	-1.7427	13
WP_GLYCOLYSIS_AND_GLUCONEOGENESIS	0.00733162	0.0938508	0.407018	-0.583552	-1.70642	33
PID_LIS1_PATHWAY	0.00749816	0.0955861	0.407018	-0.61547	-1.73406	27
REACTOME_ANTIVIRAL_MECHANISM_BY_IFN_STIMULATED_GENES	0.00768416	0.0971542	0.407018	-0.450531	-1.53743	75
REACTOME_HIV_TRANSCRIPTION_INITIATION	0.00767213	0.0971542	0.407018	-0.518985	-1.61068	45
REACTOME_TRNA_PROCESSING	0.00781853	0.0984497	0.38073	-0.409022	-1.47302	106
REACTOME_MITOCHONDRIAL_TRANSLATION	0.00787327	0.0987359	0.38073	-0.422746	-1.49906	96
REACTOME_UCH_PROTEINASES	0.00803121	0.0991051	0.38073	-0.435474	-1.50875	81
REACTOME_HIV_TRANSCRIPTION_ELONGATION	0.0079361	0.0991051	0.38073	-0.525826	-1.59056	42
PID_PI3KCI_AKT_PATHWAY	0.00799528	0.0991051	0.38073	-0.561044	-1.6563	35
WP_MEVALONATE_PATHWAY	0.00801506	0.0991051	0.38073	-0.831837	-1.66896	7
REACTOME_TRANSCRIPTIONAL_REGULATION_BY_RUNX3	0.0081286	0.0999073	0.38073	-0.431088	-1.50641	89
REACTOME_G_PROTEIN_BETA_GAMMA_SIGNALLING	0.00826337	0.100761	0.38073	0.619487	1.64075	26
REACTOME_MINERALOCORTICOID_BIOSYNTHESIS	0.00826247	0.100761	0.38073	-0.97626	-1.4517	2
PID_IL4_2PATHWAY	0.00832335	0.100807	0.38073	0.545009	1.58859	40
BIOCARTA_P35ALZHEIMERS_PATHWAY	0.00833248	0.100807	0.38073	-0.829082	-1.66343	7
REACTOME_MRNA_SPLICING	0.00851211	0.101863	0.38073	-0.341567	-1.32935	209
REACTOME_MRNA_SPLICING_MINOR_PATHWAY	0.00851888	0.101863	0.38073	-0.510373	-1.60835	50
PID_BARD1_PATHWAY	0.00851401	0.101863	0.38073	-0.596824	-1.71668	29
PID_ARF_3PATHWAY	0.00894068	0.10478	0.38073	0.678869	1.65796	19
REACTOME_REGULATION_OF_RUNX3_EXPRESSION_AND_ACTIVITY	0.0088497	0.10478	0.38073	-0.494823	-1.56921	51
WP_CARDIAC_PROGENITOR_DIFFERENTIATION	0.00896146	0.10478	0.38073	-0.512735	-1.59129	45
BIOCARTA_ALK_PATHWAY	0.00886941	0.10478	0.38073	-0.559494	-1.64483	34
WP_FATTY_ACID_BIOSYNTHESIS	0.00898094	0.10478	0.38073	-0.637961	-1.68931	20
WP_REGULATION_OF_APOPTOSIS_BY_PARATHYROID_HORMONERELATED_PROTEIN	0.00897296	0.10478	0.38073	-0.666171	-1.71103	17
REACTOME_RMTS_METHYLATE_HISTONE_ARGININES	0.00900051	0.10478	0.38073	-0.595764	-1.71363	29
WP_HYPOTHESIZED_PATHWAYS_IN_PATHOGENESIS_OF_CARDIOVASCULAR_DISEASE	0.00912144	0.105086	0.38073	0.647505	1.68145	23
WP_TP53_NETWORK	0.00912901	0.105086	0.38073	-0.66249	-1.70158	17
REACTOME_ABERRANT_REGULATION_OF_MITOTIC_G1_S_TRANSITION_IN_CANCER_DUE_TO_RB1_DEFECTS	0.00912901	0.105086	0.38073	-0.662847	-1.70249	17
REACTOME_ATF4_ACTIVATES_GENES_IN_RESPONSE_TO_ENDOPLASMIC_RETICULUM_STRESS	0.00919715	0.105477	0.38073	-0.620574	-1.68894	25
REACTOME_DIGESTION	0.00923406	0.105508	0.38073	0.894156	1.59432	5
REACTOME_METABOLISM_OF_POLYAMINES	0.00946639	0.107676	0.38073	-0.488099	-1.57479	55
BIOCARTA_G2_PATHWAY	0.00949361	0.107676	0.38073	-0.621385	-1.68364	24
REACTOME_TRANSLOCATION_OF_SLC2A4_GLUT4_TO_THE_PLASMA_MEMBRANE	0.00953253	0.107721	0.38073	-0.466254	-1.53648	62
REACTOME_HSF1_ACTIVATION	0.00966163	0.108782	0.38073	-0.57885	-1.64219	28
REACTOME_SIGNALING_BY_FGFR2_IN_DISEASE	0.00986408	0.109463	0.38073	-0.553178	-1.62626	34
REACTOME_MISMATCH_REPAIR	0.0098237	0.109463	0.38073	-0.691561	-1.71208	15
REACTOME_ACTIVATION_OF_AMPK_DOWNSTREAM_OF_NMDARS	0.00984482	0.109463	0.38073	-0.657902	-1.71608	19
REACTOME_TFAP2_AP_2_FAMILY_REGULATES_TRANSCRIPTION_OF_GROWTH_FACTORS_AND_THEIR_RECEPTORS	0.00984482	0.109463	0.38073	-0.786627	-1.74219	10
REACTOME_SEMA3A_PLEXIN_REPULSION_SIGNALING_BY_INHIBITING_INTEGRIN_ADHESION	0.00991097	0.109589	0.38073	0.703073	1.61945	14
REACTOME_NEURONAL_SYSTEM	0.0100957	0.109684	0.38073	-0.319393	-1.29616	312
KEGG_TGF_BETA_SIGNALING_PATHWAY	0.00996462	0.109684	0.38073	-0.443919	-1.50931	74
REACTOME_COPI_INDEPENDENT_GOLGI_TO_ER_RETROGRADE_TRAFFIC	0.0100973	0.109684	0.38073	-0.49751	-1.51672	43
REACTOME_DISEASES_OF_PROGRAMMED_CELL_DEATH	0.0100391	0.109684	0.38073	-0.540749	-1.62797	39
REACTOME_INHIBITION_OF_THE_PROTEOLYTIC_ACTIVITY_OF_APC_C_REQUIRED_FOR_THE_ONSET_OF_ANAPHASE_BY_MITOTIC_SPINDLE_CHECKPOINT_COMPONENTS	0.0100973	0.109684	0.38073	-0.62897	-1.66865	21
WP_TCELL_RECEPTOR_SIGNALING_PATHWAY	0.0102284	0.110085	0.38073	0.463784	1.48667	68
REACTOME_2_LTR_CIRCLE_FORMATION	0.010237	0.110085	0.38073	-0.822238	-1.6497	7
REACTOME_RESOLUTION_OF_D_LOOP_STRUCTURES_THROUGH_SYNTHESIS_DEPENDENT_STRAND_ANNEALING_SDSA	0.0102413	0.110085	0.38073	-0.604383	-1.70282	27
WP_2Q211_COPY_NUMBER_VARIATION_SYNDROME	0.0102786	0.110103	0.38073	0.709865	1.62379	13
PID_RHOA_REG_PATHWAY	0.0106811	0.113187	0.38073	0.525618	1.55732	42
NABA_MATRISOME_ASSOCIATED	0.0107838	0.113187	0.38073	0.323072	1.28039	362
REACTOME_RHO_GTPASES_ACTIVATE_PKNS	0.0107649	0.113187	0.38073	-0.564963	-1.64512	32
REACTOME_POST_CHAPERONIN_TUBULIN_FOLDING_PATHWAY	0.0106224	0.113187	0.38073	-0.688212	-1.70379	15
WP_AEROBIC_GLYCOLYSIS	0.0107867	0.113187	0.38073	-0.743245	-1.73013	12
REACTOME_UNWINDING_OF_DNA	0.0107867	0.113187	0.38073	-0.745909	-1.73633	12
BIOCARTA_FCER1_PATHWAY	0.0108331	0.113289	0.38073	0.558418	1.59922	36
REACTOME_DEGRADATION_OF_GLI1_BY_THE_PROTEASOME	0.0109227	0.11384	0.38073	-0.48515	-1.56528	55
WP_GLYCOLYSIS_IN_SENESCENCE	0.0110557	0.114838	0.38073	-0.749762	-1.68524	11
REACTOME_DEPOSITION_OF_NEW_CENPA_CONTAINING_NUCLEOSOMES_AT_THE_CENTROMERE	0.0111739	0.115676	0.38073	-0.574191	-1.62898	28
REACTOME_THE_ROLE_OF_NEF_IN_HIV_1_REPLICATION_AND_DISEASE_PATHOGENESIS	0.011252	0.115859	0.38073	0.640213	1.66251	23
PID_CD40_PATHWAY	0.0113042	0.115859	0.38073	0.604553	1.6012	26
REACTOME_TOLL_LIKE_RECEPTOR_CASCADES	0.011269	0.115859	0.38073	0.385075	1.37471	133
REACTOME_FATTY_ACIDS_BOUND_TO_GPR40_FFAR1_REGULATE_INSULIN_SECRETION	0.0113819	0.116269	0.38073	0.858485	1.59725	6
REACTOME_INTRINSIC_PATHWAY_FOR_APOPTOSIS	0.0114963	0.11705	0.38073	-0.486424	-1.54258	51
WP_APOE_AND_MIR146_IN_INFLAMMATION_AND_ATHEROSCLEROSIS	0.0116612	0.118338	0.38073	0.825544	1.61712	7
WP_SULFATION_BIOTRANSFORMATION_REACTION	0.0117426	0.118385	0.38073	0.738925	1.6306	11
WP_DNA_IRDOUBLE_STRAND_BREAKS_AND_CELLULAR_RESPONSE_VIA_ATM	0.0117137	0.118385	0.38073	-0.469523	-1.4999	53
REACTOME_AUF1_HNRNP_D0_BINDS_AND_DESTABILIZES_MRNA	0.0118271	0.118849	0.38073	-0.484725	-1.53719	51
WP_STING_PATHWAY_IN_KAWASAKILIKE_DISEASE_AND_COVID19	0.0120125	0.12032	0.38073	0.699725	1.63273	15
REACTOME_NUCLEAR_ENVELOPE_NE_REASSEMBLY	0.0120959	0.120763	0.38073	-0.451353	-1.50215	67
REACTOME_NEGATIVE_REGULATION_OF_ACTIVITY_OF_TFAP2_AP_2_FAMILY_TRANSCRIPTION_FACTORS	0.0121415	0.120828	0.38073	-0.816548	-1.63828	7
PID_TNF_PATHWAY	0.0125188	0.123985	0.38073	0.532067	1.58509	44
WP_INTERACTIONS_BETWEEN_LOXL4_AND_OXIDATIVE_STRESS_PATHWAY	0.0125391	0.123985	0.38073	-0.66795	-1.7144	18
WP_ATM_SIGNALING_IN_DEVELOPMENT_AND_DISEASE	0.0125982	0.12417	0.38073	-0.497328	-1.52606	44
REACTOME_NEGATIVE_REGULATION_OF_NOTCH4_SIGNALING	0.0127911	0.125272	0.38073	-0.495484	-1.57792	52
BIOCARTA_PARKIN_PATHWAY	0.0127764	0.125272	0.38073	-0.814455	-1.63408	7
REACTOME_INFLUENZA_INFECTION	0.0128572	0.12552	0.38073	-0.35709	-1.33327	151
WP_GASTRIC_CANCER_NETWORK_1	0.0129345	0.125877	0.38073	-0.618382	-1.65753	22
WP_OSTEOBLAST_SIGNALING	0.0130577	0.126279	0.38073	0.819879	1.60603	7
SA_G1_AND_S_PHASES	0.0130429	0.126279	0.38073	-0.707705	-1.68043	13
WP_AMINO_ACID_METABOLISM	0.01322	0.126576	0.38073	-0.451502	-1.49338	65
REACTOME_SUMOYLATION_OF_CHROMATIN_ORGANIZATION_PROTEINS	0.0131406	0.126576	0.38073	-0.471978	-1.5229	56
REACTOME_APOPTOSIS_INDUCED_DNA_FRAGMENTATION	0.0132525	0.126576	0.38073	-0.810784	-1.62672	7
REACTOME_ACTIVATION_OF_PUMA_AND_TRANSLOCATION_TO_MITOCHONDRIA	0.0132243	0.126576	0.38073	-0.77116	-1.65882	9
PID_TCR_PATHWAY	0.013687	0.128941	0.38073	0.509416	1.54097	50
REACTOME_PROTEIN_FOLDING	0.0136327	0.128941	0.38073	-0.41439	-1.43454	80
REACTOME_RUNX3_REGULATES_BCL2L11_BIM_TRANSCRIPTION	0.0137361	0.128941	0.38073	-0.886565	-1.53863	4
REACTOME_ACTIVATION_OF_GENE_EXPRESSION_BY_SREBF_SREBP	0.0135875	0.128941	0.38073	-0.514095	-1.55508	42
BIOCARTA_CELLCYCLE_PATHWAY	0.0136736	0.128941	0.38073	-0.621569	-1.6459	20
BIOCARTA_CDK5_PATHWAY	0.0137509	0.128941	0.38073	-0.733306	-1.70699	12
REACTOME_TERMINATION_OF_TRANSLESION_DNA_SYNTHESIS	0.0139359	0.13028	0.38073	-0.55578	-1.61838	32
BIOCARTA_PTC1_PATHWAY	0.0140068	0.130547	0.38073	-0.764467	-1.69311	10
REACTOME_DISEASES_OF_SIGNAL_TRANSDUCTION_BY_GROWTH_FACTOR_RECEPTORS_AND_SECOND_MESSENGERS	0.0142801	0.131505	0.38073	-0.301621	-1.25764	388
WP_INTEGRATED_CANCER_PATHWAY	0.0142627	0.131505	0.38073	-0.512588	-1.55052	42
SA_G2_AND_M_PHASES	0.0142722	0.131505	0.38073	-0.795204	-1.64109	8
BIOCARTA_DNAFRAGMENT_PATHWAY	0.0141745	0.131505	0.38073	-0.768488	-1.65307	9
KEGG_TOLL_LIKE_RECEPTOR_SIGNALING_PATHWAY	0.0143958	0.131783	0.38073	0.474686	1.50678	63
BIOCARTA_THELPER_PATHWAY	0.0143586	0.131783	0.38073	0.943046	1.48577	3
WP_ANGIOTENSIN_II_RECEPTOR_TYPE_1_PATHWAY	0.0146649	0.133062	0.38073	0.634403	1.60291	21
BIOCARTA_EFP_PATHWAY	0.0146157	0.133062	0.38073	-0.676031	-1.67364	15
BIOCARTA_RANMS_PATHWAY	0.0146471	0.133062	0.38073	-0.76348	-1.69093	10
REACTOME_ENDOSOMAL_VACUOLAR_PATHWAY	0.0148197	0.134073	0.38073	0.800652	1.60583	8
REACTOME_NEF_MEDIATES_DOWN_MODULATION_OF_CELL_SURFACE_RECEPTORS_BY_RECRUITING_THEM_TO_CLATHRIN_ADAPTERS	0.014933	0.134702	0.38073	0.65803	1.58908	18
REACTOME_ERYTHROCYTES_TAKE_UP_CARBON_DIOXIDE_AND_RELEASE_OXYGEN	0.015102	0.13527	0.38073	0.79963	1.60378	8
REACTOME_TNFR1_INDUCED_NFKAPPAB_SIGNALING_PATHWAY	0.0151274	0.13527	0.38073	0.556081	1.51838	31
WP_ARSENIC_METABOLISM_AND_REACTIVE_OXYGEN_SPECIES_GENERATION	0.0151066	0.13527	0.38073	-0.740385	-1.66417	11
REACTOME_RECRUITMENT_OF_NUMA_TO_MITOTIC_CENTROSOMES	0.0152449	0.135656	0.38073	-0.41158	-1.43545	85
REACTOME_CYCLIN_D_ASSOCIATED_EVENTS_IN_G1	0.0152586	0.135656	0.38073	-0.498641	-1.54754	45
KEGG_PARKINSONS_DISEASE	0.0153089	0.135713	0.38073	-0.39262	-1.41043	104
REACTOME_RECRUITMENT_OF_MITOTIC_CENTROSOME_PROTEINS_AND_COMPLEXES	0.0156399	0.137855	0.352488	-0.411047	-1.42297	80
REACTOME_RHO_GTPASES_ACTIVATE_PAKS	0.0156049	0.137855	0.38073	-0.611399	-1.62203	21
REACTOME_MRNA_CAPPING	0.0158116	0.138183	0.352488	-0.571277	-1.6432	29
KEGG_TERPENOID_BACKBONE_BIOSYNTHESIS	0.0157676	0.138183	0.352488	-0.67508	-1.65205	14
REACTOME_PROCESSIVE_SYNTHESIS_ON_THE_C_STRAND_OF_THE_TELOMERE	0.0157676	0.138183	0.352488	-0.638564	-1.66563	19
REACTOME_ANCHORING_OF_THE_BASAL_BODY_TO_THE_PLASMA_MEMBRANE	0.0159254	0.138785	0.352488	-0.38035	-1.34418	95
REACTOME_DEFECTIVE_FACTOR_VIII_CAUSES_HEMOPHILIA_A	0.0161397	0.139488	0.352488	0.84338	1.56915	6
WP_COMPLEMENT_SYSTEM	0.016068	0.139488	0.352488	0.488407	1.49689	53
REACTOME_DEGRADATION_OF_BETA_CATENIN_BY_THE_DESTRUCTION_COMPLEX	0.0161417	0.139488	0.352488	-0.409621	-1.41804	80
WP_EXTRAFOLLICULAR_AND_FOLLICULAR_B_CELL_ACTIVATION_BY_SARSCOV2	0.0162376	0.139925	0.352488	0.553146	1.51036	31
REACTOME_TP53_REGULATES_METABOLIC_GENES	0.0163252	0.140287	0.352488	-0.422885	-1.47485	84
WP_CELL_DIFFERENTIATION_INDEX	0.0163933	0.140482	0.352488	-0.762667	-1.64055	9
BIOCARTA_CD40_PATHWAY	0.0165767	0.14166	0.352488	0.678921	1.56382	14
REACTOME_FOXO_MEDIATED_TRANSCRIPTION	0.0167497	0.142742	0.352488	-0.469939	-1.5162	55
REACTOME_TNFR1_INDUCED_PROAPOPTOTIC_SIGNALING	0.0168175	0.142925	0.352488	0.621792	1.59373	22
WP_HEPATITIS_B_INFECTION	0.0169111	0.142934	0.352488	0.383584	1.36321	128
SA_REG_CASCADE_OF_CYCLIN_EXPR	0.0168913	0.142934	0.352488	-0.756838	-1.67622	10
REACTOME_PERK_REGULATES_GENE_EXPRESSION	0.0171121	0.144237	0.352488	-0.55592	-1.60082	30
KEGG_STEROID_BIOSYNTHESIS	0.0171761	0.144382	0.352488	-0.668166	-1.65416	15
REACTOME_TRISTETRAPROLIN_TTP_ZFP36_BINDS_AND_DESTABILIZES_MRNA	0.0174073	0.145928	0.352488	-0.631643	-1.62235	17
REACTOME_CA2_PATHWAY	0.0175279	0.146541	0.352488	0.491853	1.51353	55
WP_PHOTODYNAMIC_THERAPYINDUCED_NFKB_SURVIVAL_SIGNALING	0.0176247	0.146556	0.352488	0.628755	1.58864	21
REACTOME_TRANSCRIPTIONAL_REGULATION_BY_THE_AP_2_TFAP2_FAMILY_OF_TRANSCRIPTION_FACTORS	0.0176105	0.146556	0.352488	-0.532347	-1.55163	31
WP_HEMATOPOIETIC_STEM_CELL_DIFFERENTIATION	0.0178169	0.147756	0.352488	0.521544	1.5202	40
REACTOME_TACHYKININ_RECEPTORS_BIND_TACHYKININS	0.0178846	0.147919	0.352488	-0.930071	-1.49863	3
REACTOME_ORGANIC_ANION_TRANSPORTERS	0.0180455	0.148852	0.352488	-0.878955	-1.52542	4
REACTOME_NUCLEAR_ENVELOPE_BREAKDOWN	0.0184108	0.15146	0.352488	-0.480368	-1.52978	52
REACTOME_RESOLUTION_OF_D_LOOP_STRUCTURES	0.0185755	0.152408	0.352488	-0.535664	-1.58138	35
WP_ARYL_HYDROCARBON_RECEPTOR_PATHWAY_WP2586	0.018659	0.152687	0.352488	-0.52323	-1.55634	37
WP_ARYL_HYDROCARBON_RECEPTOR_PATHWAY_WP2873	0.0187433	0.152971	0.352488	-0.558594	-1.58473	28
REACTOME_SIGNALING_BY_FGFR_IN_DISEASE	0.018868	0.153583	0.352488	-0.452637	-1.44596	53
REACTOME_ANCHORING_FIBRIL_FORMATION	0.0193626	0.155796	0.352488	0.751113	1.58403	10
REACTOME_SCAVENGING_BY_CLASS_A_RECEPTORS	0.0193988	0.155796	0.352488	0.676032	1.57744	15
WP_ACETYLCHOLINE_SYNTHESIS	0.0194093	0.155796	0.352488	0.868609	1.54877	5
REACTOME_BUTYRATE_RESPONSE_FACTOR_1_BRF1_BINDS_AND_DESTABILIZES_MRNA	0.0192891	0.155796	0.352488	-0.623129	-1.60048	17
BIOCARTA_P53HYPOXIA_PATHWAY	0.0192881	0.155796	0.352488	-0.603441	-1.60092	21
REACTOME_FORMATION_OF_THE_EARLY_ELONGATION_COMPLEX	0.0194626	0.155796	0.352488	-0.550443	-1.6096	33
BIOCARTA_KREB_PATHWAY	0.0194934	0.155796	0.352488	-0.783134	-1.61618	8
REACTOME_HORMONE_LIGAND_BINDING_RECEPTORS	0.0195986	0.156232	0.352488	-0.963303	-1.43243	2
REACTOME_INTERLEUKIN_7_SIGNALING	0.019957	0.158679	0.352488	0.649957	1.56958	18
KEGG_PROGESTERONE_MEDIATED_OOCYTE_MATURATION	0.0200941	0.159212	0.352488	-0.422868	-1.44665	76
REACTOME_SYNTHESIS_SECRETION_AND_INACTIVATION_OF_GLUCOSE_DEPENDENT_INSULINOTROPIC_POLYPEPTIDE_GIP	0.0201273	0.159212	0.352488	-0.779761	-1.60922	8
REACTOME_INTEGRATION_OF_PROVIRUS	0.020213	0.159481	0.352488	-0.752414	-1.61849	9
REACTOME_G2_M_DNA_REPLICATION_CHECKPOINT	0.020358	0.160216	0.352488	-0.841533	-1.54219	5
WP_NANOPARTICLE_TRIGGERED_REGULATED_NECROSIS	0.020477	0.160742	0.352488	0.74935	1.58031	10
REACTOME_ACTIVATION_OF_NMDA_RECEPTORS_AND_POSTSYNAPTIC_EVENTS	0.0205582	0.160969	0.352488	-0.414117	-1.41922	78
REACTOME_ANTIMICROBIAL_PEPTIDES	0.0209507	0.163628	0.352488	0.756959	1.56305	9
REACTOME_SYNTHESIS_OF_BILE_ACIDS_AND_BILE_SALTS_VIA_27_HYDROXYCHOLESTEROL	0.0210342	0.16376	0.352488	0.747128	1.57562	10
BIOCARTA_SM_PATHWAY	0.0210738	0.16376	0.352488	-0.663198	-1.62297	14
BIOCARTA_NFKB_PATHWAY	0.0213128	0.165201	0.352488	0.638952	1.56047	19
REACTOME_IL_6_TYPE_CYTOKINE_RECEPTOR_LIGAND_INTERACTIONS	0.0214689	0.165994	0.352488	0.675161	1.54441	13
REACTOME_FGFR2_LIGAND_BINDING_AND_ACTIVATION	0.0221228	0.170197	0.352488	-0.745403	-1.60341	9
REACTOME_BH3_ONLY_PROTEINS_ASSOCIATE_WITH_AND_INACTIVATE_ANTI_APOPTOTIC_BCL_2_MEMBERS	0.0221228	0.170197	0.352488	-0.746404	-1.60557	9
REACTOME_FATTY_ACYL_COA_BIOSYNTHESIS	0.0224573	0.17234	0.352488	-0.523544	-1.52597	31
REACTOME_NR1H3_NR1H2_REGULATE_GENE_EXPRESSION_LINKED_TO_CHOLESTEROL_TRANSPORT_AND_EFFLUX	0.0226215	0.17317	0.352488	0.539097	1.472	31
REACTOME_DECTIN_1_MEDIATED_NONCANONICAL_NF_KB_SIGNALING	0.0231301	0.175755	0.352488	-0.451091	-1.45551	56
REACTOME_DNA_DAMAGE_BYPASS	0.0230795	0.175755	0.352488	-0.474539	-1.48637	48
REACTOME_SUMOYLATION_OF_UBIQUITINYLATION_PROTEINS	0.023127	0.175755	0.352488	-0.493842	-1.49005	38
REACTOME_REGULATION_OF_RAS_BY_GAPS	0.0233133	0.176711	0.352488	-0.44016	-1.44991	63
WP_ETHANOL_EFFECTS_ON_HISTONE_MODIFICATIONS	0.0235173	0.177821	0.352488	0.574804	1.5224	26
KEGG_CYSTEINE_AND_METHIONINE_METABOLISM	0.0236677	0.178085	0.352488	-0.578356	-1.57404	25
KEGG_GLYOXYLATE_AND_DICARBOXYLATE_METABOLISM	0.0236477	0.178085	0.352488	-0.656091	-1.60558	14
BIOCARTA_NEUTROPHIL_PATHWAY	0.0239428	0.178182	0.352488	0.858945	1.53153	5
WP_BURN_WOUND_HEALING	0.0238371	0.178182	0.352488	0.445386	1.44019	73
WP_NEURAL_CREST_DIFFERENTIATION	0.0239636	0.178182	0.352488	0.412862	1.36861	86
REACTOME_REELIN_SIGNALLING_PATHWAY	0.0238299	0.178182	0.352488	-0.834358	-1.52904	5
REACTOME_RHO_GTPASES_ACTIVATE_CIT	0.0239694	0.178182	0.352488	-0.61925	-1.61526	19
REACTOME_PRESYNAPTIC_FUNCTION_OF_KAINATE_RECEPTORS	0.0240797	0.178571	0.352488	0.643773	1.5268	17
REACTOME_COMPLEMENT_CASCADE	0.0242208	0.179019	0.352488	0.602312	1.56578	24
REACTOME_TRANSPORT_OF_CONNEXONS_TO_THE_PLASMA_MEMBRANE	0.0242561	0.179019	0.352488	-0.721521	-1.62177	11
WP_AUTOSOMAL_RECESSIVE_OSTEOPETROSIS_PATHWAYS	0.0246559	0.179789	0.352488	0.738066	1.55651	10
REACTOME_DDX58_IFIH1_MEDIATED_INDUCTION_OF_INTERFERON_ALPHA_BETA	0.0244836	0.179789	0.352488	0.449752	1.41943	62
REACTOME_G_ALPHA_12_13_SIGNALLING_EVENTS	0.024758	0.179789	0.352488	0.433757	1.39371	70
REACTOME_ESTROGEN_DEPENDENT_GENE_EXPRESSION	0.0244781	0.179789	0.352488	-0.401945	-1.40067	86
REACTOME_NEUREXINS_AND_NEUROLIGINS	0.0247684	0.179789	0.352488	-0.461345	-1.46304	51
REACTOME_METABOLISM_OF_FOLATE_AND_PTERINES	0.02456	0.179789	0.352488	-0.645219	-1.59735	15
WP_MEVALONATE_ARM_OF_CHOLESTEROL_BIOSYNTHESIS_PATHWAY	0.0246588	0.179789	0.352488	-0.709631	-1.65188	12
WP_B_CELL_RECEPTOR_SIGNALING_PATHWAY	0.0252876	0.181737	0.352488	0.410847	1.36193	86
REACTOME_GLOBAL_GENOME_NUCLEOTIDE_EXCISION_REPAIR_GG_NER	0.0253313	0.181737	0.352488	-0.410906	-1.43307	84
WP_STEROL_REGULATORY_ELEMENTBINDING_PROTEINS_SREBP_SIGNALING	0.0253259	0.181737	0.352488	-0.436806	-1.43886	63
REACTOME_ASSOCIATION_OF_TRIC_CCT_WITH_TARGET_PROTEINS_DURING_BIOSYNTHESIS	0.0252693	0.181737	0.352488	-0.522184	-1.54158	35
PID_ATM_PATHWAY	0.0253259	0.181737	0.352488	-0.534421	-1.55618	32
KEGG_DRUG_METABOLISM_OTHER_ENZYMES	0.0254278	0.182007	0.352488	0.606515	1.55457	22
KEGG_ADHERENS_JUNCTION	0.0255131	0.182194	0.352488	-0.42137	-1.41559	72
WP_OSTEOBLAST_DIFFERENTIATION_AND_RELATED_DISEASES	0.0256003	0.182395	0.352488	-0.383098	-1.36965	101
SIG_BCR_SIGNALING_PATHWAY	0.0257052	0.18272	0.352488	0.509049	1.48378	40
BIOCARTA_GRANULOCYTES_PATHWAY	0.0259637	0.182863	0.352488	0.827748	1.54007	6
WP_COMPLEMENT_ACTIVATION	0.0260597	0.182863	0.352488	0.667879	1.52775	13
REACTOME_DEGRADATION_OF_AXIN	0.0260982	0.182863	0.352488	-0.458449	-1.45386	51
WP_CHOLESTEROL_METABOLISM	0.0261402	0.182863	0.352488	-0.455175	-1.47415	57
REACTOME_TRANSLESION_SYNTHESIS_BY_POLK	0.0258755	0.182863	0.352488	-0.606404	-1.55752	17
REACTOME_SYNTHESIS_OF_WYBUTOSINE_AT_G37_OF_TRNA_PHE	0.0259979	0.182863	0.352488	-0.822127	-1.57304	6
REACTOME_INTERCONVERSION_OF_NUCLEOTIDE_DI_AND_TRIPHOSPHATES	0.0259124	0.182863	0.352488	-0.552136	-1.58814	29
KEGG_NOD_LIKE_RECEPTOR_SIGNALING_PATHWAY	0.0266295	0.184714	0.352488	0.513726	1.51004	41
PID_IL12_STAT4_PATHWAY	0.0266443	0.184714	0.352488	0.636698	1.51002	17
KEGG_LEUKOCYTE_TRANSENDOTHELIAL_MIGRATION	0.0266162	0.184714	0.352488	-0.387581	-1.37327	94
REACTOME_SENESCENCE_ASSOCIATED_SECRETORY_PHENOTYPE_SASP	0.0265065	0.184714	0.352488	-0.471704	-1.4739	46
REACTOME_GAP_FILLING_DNA_REPAIR_SYNTHESIS_AND_LIGATION_IN_GG_NER	0.0267773	0.18522	0.352488	-0.5742	-1.56273	25
REACTOME_THROMBIN_SIGNALLING_THROUGH_PROTEINASE_ACTIVATED_RECEPTORS_PARS	0.0269718	0.186148	0.352488	0.56887	1.50669	26
REACTOME_DISEASES_ASSOCIATED_WITH_SURFACTANT_METABOLISM	0.0272155	0.18741	0.352488	-0.913459	-1.47186	3
PID_FOXO_PATHWAY	0.0277471	0.19041	0.352488	-0.454518	-1.42066	47
REACTOME_POLYMERASE_SWITCHING_ON_THE_C_STRAND_OF_THE_TELOMERE	0.0277745	0.19041	0.352488	-0.559486	-1.54923	26
REACTOME_SODIUM_COUPLED_PHOSPHATE_COTRANSPORTERS	0.0281486	0.192546	0.352488	-0.910415	-1.46696	3
REACTOME_SIGNALING_BY_RHO_GTPASES_MIRO_GTPASES_AND_RHOBTB3	0.0287343	0.195581	0.352488	-0.267346	-1.14996	615
REACTOME_REGULATION_OF_CHOLESTEROL_BIOSYNTHESIS_BY_SREBP_SREBF	0.0287831	0.195581	0.352488	-0.443863	-1.43207	55
WP_AMINO_ACID_METABOLISM_PATHWAY_EXCERPT_HISTIDINE_CATABOLISM_EXTENSION	0.0287706	0.195581	0.352488	-0.906642	-1.46088	3
WP_FATTY_ACID_BETAOXIDATION	0.0288458	0.195581	0.352488	-0.546369	-1.57155	29
WP_GENE_REGULATORY_NETWORK_MODELLING_SOMITOGENESIS	0.0292185	0.196381	0.352488	0.772525	1.54942	8
WP_NEURODEGENERATION_WITH_BRAIN_IRON_ACCUMULATION_NBIA_SUBTYPES_PATHWAY	0.0292119	0.196381	0.352488	0.493848	1.46319	42
REACTOME_APC_CDC20_MEDIATED_DEGRADATION_OF_NEK2A	0.0291376	0.196381	0.352488	-0.557884	-1.5448	26
BIOCARTA_CHREBP_PATHWAY	0.0290546	0.196381	0.352488	-0.634137	-1.56992	15
BIOCARTA_DC_PATHWAY	0.0293552	0.196871	0.352488	0.951957	1.38526	2
WP_GENES_RELATED_TO_PRIMARY_CILIUM_DEVELOPMENT_BASED_ON_CRISPR	0.0294851	0.196886	0.352488	0.40655	1.36376	92
BIOCARTA_G1_PATHWAY	0.0294784	0.196886	0.352488	-0.557415	-1.5435	26
REACTOME_SYNTHESIS_OF_UDP_N_ACETYL_GLUCOSAMINE	0.0297858	0.197433	0.352488	0.7704	1.54515	8
REACTOME_DEVELOPMENTAL_BIOLOGY	0.0297764	0.197433	0.352488	-0.258229	-1.12977	813
KEGG_PATHWAYS_IN_CANCER	0.0296354	0.197433	0.352488	-0.310752	-1.25501	287
REACTOME_PROTEIN_PROTEIN_INTERACTIONS_AT_SYNAPSES	0.0298869	0.197433	0.352488	-0.403061	-1.38133	78
REACTOME_METALLOTHIONEINS_BIND_METALS	0.0298267	0.197433	0.352488	-0.826498	-1.51464	5
WP_COMMON_PATHWAYS_UNDERLYING_DRUG_ADDICTION	0.0299553	0.197462	0.352488	-0.530358	-1.55087	33
REACTOME_SELECTIVE_AUTOPHAGY	0.0300934	0.197949	0.352488	-0.413906	-1.39309	71
REACTOME_TRANSCRIPTION_OF_E2F_TARGETS_UNDER_NEGATIVE_CONTROL_BY_DREAM_COMPLEX	0.0307258	0.201679	0.352488	-0.604965	-1.578	19
REACTOME_SIGNALING_BY_BMP	0.0308416	0.202009	0.352488	-0.556677	-1.54146	26
BIOCARTA_IL7_PATHWAY	0.0314362	0.202465	0.321776	0.710888	1.59614	12
REACTOME_HOST_INTERACTIONS_OF_HIV_FACTORS	0.0313693	0.202465	0.321776	-0.362415	-1.32848	121
KEGG_NUCLEOTIDE_EXCISION_REPAIR	0.0313638	0.202465	0.321776	-0.460885	-1.40506	43
WP_PROTEASOME_DEGRADATION	0.031385	0.202465	0.321776	-0.454768	-1.4657	54
PID_REELIN_PATHWAY	0.0312385	0.202465	0.352488	-0.530908	-1.50618	28
WP_LINOLEIC_ACID_METABOLISM_AFFECTED_BY_SARSCOV2	0.0310892	0.202465	0.352488	-0.822597	-1.50749	5
WP_PEPTIDE_GPCRS	0.0313638	0.202465	0.321776	-0.583613	-1.54832	21
REACTOME_UBIQUINOL_BIOSYNTHESIS	0.031221	0.202465	0.352488	-0.758753	-1.56587	8
WP_NUCLEOTIDE_EXCISION_REPAIR	0.0316095	0.203157	0.321776	-0.458372	-1.40652	44
BIOCARTA_IL2_PATHWAY	0.0316963	0.203291	0.321776	0.626652	1.5133	18
PID_NFKAPPAB_CANONICAL_PATHWAY	0.0319002	0.203752	0.321776	0.60624	1.49693	20
REACTOME_DNA_REPLICATION_INITIATION	0.0318549	0.203752	0.321776	-0.7572	-1.56266	8
WP_NODLIKE_RECEPTOR_NLR_SIGNALING_PATHWAY	0.0324998	0.206797	0.321776	0.736958	1.52175	9
WP_INITIATION_OF_TRANSCRIPTION_AND_TRANSLATION_ELONGATION_AT_THE_HIV1_LTR	0.0326356	0.206797	0.321776	0.52532	1.43439	31
BIOCARTA_ACETAMINOPHEN_PATHWAY	0.0326451	0.206797	0.321776	0.950445	1.38306	2
KEGG_CELL_ADHESION_MOLECULES_CAMS	0.0325309	0.206797	0.321776	-0.38233	-1.35466	94
NABA_BASEMENT_MEMBRANES	0.0328969	0.206931	0.321776	0.540878	1.51051	34
BIOCARTA_CALCINEURIN_PATHWAY	0.0328183	0.206931	0.321776	0.624293	1.5076	18
REACTOME_PROGRAMMED_CELL_DEATH	0.0329676	0.206931	0.321776	-0.328507	-1.25696	179
REACTOME_INTERACTIONS_OF_VPR_WITH_HOST_CELLULAR_PROTEINS	0.0330016	0.206931	0.321776	-0.499738	-1.4757	36
WP_ONECARBON_METABOLISM	0.0329965	0.206931	0.321776	-0.564027	-1.53504	25
[truncated: 2,593 more rows]

## Sheet: NE_gseGO_Gene_ontology
ONTOLOGY	ID	Description	setSize	enrichmentScore	NES	pvalue	p.adjust	qvalue	rank	leading_edge	core_enrichment
[truncated: 1,649 more rows]

## Sheet: HEP_gseGO_Gene_ontology
ONTOLOGY	ID	Description	setSize	enrichmentScore	NES	pvalue	p.adjust	qvalue	rank	leading_edge	core_enrichment
[truncated: 1,913 more rows]

[truncated: 1 more sheets: CP_gseGO_Gene_ontology]
